# Supplementary material for: A new yeast strain for valorisation of vinasse, a rum distillery waste product
Source: Biotechnol Biofuels Bioprod. 2025 Jul 18;18:76. doi: 10.1186/s13068-025-02671-0 (PMC12273314; doi:10.1186/s13068-025-02671-0)
Supplement: Supplementary file 2 — Supplementary Material 2. [file 13068_2025_2671_MOESM2_ESM.xlsx]

## Sheet: 1_Panel orthologs
Source	Function	Orthogroup	Scerevisiae orthologs	V1 orthologs	Pichia kudriavzevii ref orthologs	Yarrowia lipolytica orthologs
LIST1	Complex lipids	OG0001996	ERG10	g2011	BOH78_0422	YALI0B08536p
LIST1	Complex lipids	OG0003012	ERG13	g4119	BOH78_1273	YALI0F30481p
LIST1	Complex lipids	OG0001387	LCB1	g807	BOH78_2930	YALI0C03179p
LIST1	Complex lipids	OG0002785	LCB2	g3640	BOH78_0164	YALI0F15345p
LIST1	Complex lipids	N/A	TSC3	N/A	N/A	N/A
LIST1	De novo	OG0000668	ACC1, HFA1	g1541	BOH78_1078	YALI0C11407p
LIST1	De novo	OG0000130	ELO1, ELO2, ELO3	g1495, g1666	BOH78_0456, BOH78_1875	YALI0B20196p
LIST1	De novo	OG0002544	FAS1	g3143	BOH78_2482	YALI0B15059p
LIST1	De novo	OG0001037	FAS2	g75	BOH78_1417	YALI0B19382p
LIST1	Degradation	OG0000525	FOX2	g165	BOH78_1320	YALI0E15378p
LIST1	External uptake	OG0000458	FAA1, FAA3, FAA4	g3553	BOH78_0754	YALI0D17864p
LIST1	External uptake	N/A	FAA2	N/A	N/A	N/A
LIST1	External uptake	OG0002592	FAT1	g3239	BOH78_4620	YALI0E16016p
LIST1	External uptake	OG0000394	YPK1, YPK2	g1884	BOH78_2763	YALI0C04158p, YALI0E06501p
LIST1	Lipid Degrad	OG0003561	AYR1	g3794	BOH78_3464	N/A
LIST1	Lipid Degrad	OG0002234	TGL2	g2524	BOH78_2616	YALI0E31515p
LIST1	Lipid Degrad	OG0000759	YDC1, YPC1	g2291	BOH78_1210	YALI0D20262p
LIST1	Lipid Degrad	OG0003184	YEH1, YEH2	YES	BOH78_4105	YALI0E00528p
LIST1	Lipid Degrad	OG0001044	YJU3	g87	BOH78_1406	YALI0C14520p
LIST2		N/A	GUT1	N/A	N/A	N/A
LIST2		OG0000461	GPD1, GPD2	g3633	BOH78_0171	YALI0B02948p
LIST2		N/A	GUT2	N/A	N/A	N/A
LIST2	Complex lipids	OG0000395	SCT1	g2455	BOH78_3328	YALI0C00209p
LIST2	Complex lipids	N/A	GPT2	N/A	N/A	N/A
LIST2		OG0000165	SLC1, SWS2	g3360,YES	BOH78_2572, BOH78_2573	YALI0B06578p, YALI0E18964p
LIST2	Storage	OG0000943	DGA1	g4166	BOH78_4317	YALI0E32769p
LIST2	Storage	N/A	LRO1	N/A	N/A	N/A
LIST2	Lipid Degrad	OG0000886	TGL3	g3722	BOH78_0712	YALI0D17534p
LIST2	Lipid Degrad	OG0000362	TGL4, TGL5,	g1052	BOH78_0638	YALI0F10010p
LIST2	Storage	OG0000384	ARE1, ARE2	g1616	BOH78_4880	YALI0F06578p
LIST2	Lipid Degrad	OG0000084	TGL1	g1357, g1746, g4472	BOH78_1108, BOH78_3203, BOH78_5157	YALI0E32035p
LIST2		OG0000038	POX1	g1920	BOH78_2802	YALI0E32835g
LIST2		N/A	POX2/3/4/5	N/A	N/A	YALI0C23859p, YALI0D24750p, YALI0E27654p, YALI0F10857p
LIST2		N/A	POX6	N/A	N/A	YALI0E06567g
LIST2		OG0000525	MFE1(FOX2)	g165	BOH78_1320	YALI0E15378p
LIST2		OG0001424	POT1	g869	BOH78_3388	YALI0E18568p

## Sheet: 2_SNPS ALL
Pk ref ID	Position	ref	V1	Type	Significance	Lipid	Scerevisiae ID	Pk ref ID (orthogroups)	PK ref genes	Type
BOH78_Sc001	346486	T	C	downstream_gene_variant	MODIFIER	L	GPD1, GPD2	BOH78_0171	BOH78_0171	transcript	ONH77843	protein_coding	c.*70T>C	70	,C	intergenic_region	MODIFIER	BOH78_0171-BOH78_0172	BOH78_0171-BOH78_0172	intergenic_region	BOH78_0171-BOH78_0172	n.346486T>C
BOH78_Sc001	346426	A	G	downstream_gene_variant	MODIFIER	L	GPD1, GPD2	BOH78_0171	BOH78_0171	transcript	ONH77843	protein_coding	c.*10A>G	10	,G	intergenic_region	MODIFIER	BOH78_0171-BOH78_0172	BOH78_0171-BOH78_0172	intergenic_region	BOH78_0171-BOH78_0172	n.346426A>G
BOH78_Sc002	143464	C	T	downstream_gene_variant	MODIFIER	L	ERG10	BOH78_0422	BOH78_0422	transcript	ONH77180	protein_coding	c.*477C>T	477	,T	intergenic_region	MODIFIER	BOH78_0422-BOH78_0423	BOH78_0422-BOH78_0423	intergenic_region	BOH78_0422-BOH78_0423	n.143464C>T
BOH78_Sc002	143385	T	C	downstream_gene_variant	MODIFIER	L	ERG10	BOH78_0422	BOH78_0422	transcript	ONH77180	protein_coding	c.*398T>C	398	,C	intergenic_region	MODIFIER	BOH78_0422-BOH78_0423	BOH78_0422-BOH78_0423	intergenic_region	BOH78_0422-BOH78_0423	n.143385T>C
BOH78_Sc002	143058	A	T	downstream_gene_variant	MODIFIER	L	ERG10	BOH78_0422	BOH78_0422	transcript	ONH77180	protein_coding	c.*71A>T	71	,T	intergenic_region	MODIFIER	BOH78_0422-BOH78_0423	BOH78_0422-BOH78_0423	intergenic_region	BOH78_0422-BOH78_0423	n.143058A>T
BOH78_Sc002	143405	G	T	downstream_gene_variant	MODIFIER	L	ERG10	BOH78_0422	BOH78_0422	transcript	ONH77180	protein_coding	c.*418G>T	418	,T	intergenic_region	MODIFIER	BOH78_0422-BOH78_0423	BOH78_0422-BOH78_0423	intergenic_region	BOH78_0422-BOH78_0423	n.143405G>T
BOH78_Sc002	143082	A	T	downstream_gene_variant	MODIFIER	L	ERG10	BOH78_0422	BOH78_0422	transcript	ONH77180	protein_coding	c.*95A>T	95	,T	intergenic_region	MODIFIER	BOH78_0422-BOH78_0423	BOH78_0422-BOH78_0423	intergenic_region	BOH78_0422-BOH78_0423	n.143082A>T
BOH78_Sc002	143124	C	T	downstream_gene_variant	MODIFIER	L	ERG10	BOH78_0422	BOH78_0422	transcript	ONH77180	protein_coding	c.*137C>T	137	,T	intergenic_region	MODIFIER	BOH78_0422-BOH78_0423	BOH78_0422-BOH78_0423	intergenic_region	BOH78_0422-BOH78_0423	n.143124C>T
BOH78_Sc002	143469	T	A	downstream_gene_variant	MODIFIER	L	ERG10	BOH78_0422	BOH78_0422	transcript	ONH77180	protein_coding	c.*482T>A	482	,A	intergenic_region	MODIFIER	BOH78_0422-BOH78_0423	BOH78_0422-BOH78_0423	intergenic_region	BOH78_0422-BOH78_0423	n.143469T>A
BOH78_Sc002	143137	C	G	downstream_gene_variant	MODIFIER	L	ERG10	BOH78_0422	BOH78_0422	transcript	ONH77180	protein_coding	c.*150C>G	150	,G	intergenic_region	MODIFIER	BOH78_0422-BOH78_0423	BOH78_0422-BOH78_0423	intergenic_region	BOH78_0422-BOH78_0423	n.143137C>G
BOH78_Sc002	143075	C	T	downstream_gene_variant	MODIFIER	L	ERG10	BOH78_0422	BOH78_0422	transcript	ONH77180	protein_coding	c.*88C>T	88	,T	intergenic_region	MODIFIER	BOH78_0422-BOH78_0423	BOH78_0422-BOH78_0423	intergenic_region	BOH78_0422-BOH78_0423	n.143075C>T
BOH78_Sc002	143081	G	T	downstream_gene_variant	MODIFIER	L	ERG10	BOH78_0422	BOH78_0422	transcript	ONH77180	protein_coding	c.*94G>T	94	,T	intergenic_region	MODIFIER	BOH78_0422-BOH78_0423	BOH78_0422-BOH78_0423	intergenic_region	BOH78_0422-BOH78_0423	n.143081G>T
BOH78_Sc002	219137	T	A	downstream_gene_variant	MODIFIER	L	ELO1, ELO2, ELO3	BOH78_0456, BOH78_1875	BOH78_0456	transcript	ONH77331	protein_coding	c.*100T>A	100	,A	downstream_gene_variant	MODIFIER	BOH78_0457	BOH78_0457	transcript	ONH77330	protein_coding	c.*138A>T	138	,A	intergenic_region	MODIFIER	BOH78_0456-BOH78_0457	BOH78_0456-BOH78_0457	intergenic_region	BOH78_0456-BOH78_0457	n.219137T>A
BOH78_Sc002	219086	C	T	downstream_gene_variant	MODIFIER	L	ELO1, ELO2, ELO3	BOH78_0456, BOH78_1875	BOH78_0456	transcript	ONH77331	protein_coding	c.*49C>T	49	,T	downstream_gene_variant	MODIFIER	BOH78_0457	BOH78_0457	transcript	ONH77330	protein_coding	c.*189G>A	189	,T	intergenic_region	MODIFIER	BOH78_0456-BOH78_0457	BOH78_0456-BOH78_0457	intergenic_region	BOH78_0456-BOH78_0457	n.219086C>T
BOH78_Sc002	591596	A	G	downstream_gene_variant	MODIFIER	L	TGL4, TGL5,	BOH78_0638	BOH78_0638	transcript	ONH77074	protein_coding	c.*471T>C	471	,G	intergenic_region	MODIFIER	BOH78_0637-BOH78_0638	BOH78_0637-BOH78_0638	intergenic_region	BOH78_0637-BOH78_0638	n.591596A>G
BOH78_Sc003	22611	G	A	downstream_gene_variant	MODIFIER	L	TGL3	BOH78_0712	BOH78_0712	transcript	ONH76835	protein_coding	c.*275C>T	275	,A	intergenic_region	MODIFIER	BOH78_0711-BOH78_0712	BOH78_0711-BOH78_0712	intergenic_region	BOH78_0711-BOH78_0712	n.22611G>A
BOH78_Sc003	22824	G	A	downstream_gene_variant	MODIFIER	L	TGL3	BOH78_0712	BOH78_0712	transcript	ONH76835	protein_coding	c.*62C>T	62	,A	intergenic_region	MODIFIER	BOH78_0711-BOH78_0712	BOH78_0711-BOH78_0712	intergenic_region	BOH78_0711-BOH78_0712	n.22824G>A
BOH78_Sc005	199572	C	T	downstream_gene_variant	MODIFIER	L	YJU3	BOH78_1406	BOH78_1406	transcript	ONH76030	protein_coding	c.*227C>T	227	,T	intergenic_region	MODIFIER	BOH78_1406-BOH78_1407	BOH78_1406-BOH78_1407	intergenic_region	BOH78_1406-BOH78_1407	n.199572C>T
BOH78_Sc005	199560	C	A	downstream_gene_variant	MODIFIER	L	YJU3	BOH78_1406	BOH78_1406	transcript	ONH76030	protein_coding	c.*215C>A	215	,A	intergenic_region	MODIFIER	BOH78_1406-BOH78_1407	BOH78_1406-BOH78_1407	intergenic_region	BOH78_1406-BOH78_1407	n.199560C>A
BOH78_Sc005	199576	T	C	downstream_gene_variant	MODIFIER	L	YJU3	BOH78_1406	BOH78_1406	transcript	ONH76030	protein_coding	c.*231T>C	231	,C	intergenic_region	MODIFIER	BOH78_1406-BOH78_1407	BOH78_1406-BOH78_1407	intergenic_region	BOH78_1406-BOH78_1407	n.199576T>C
BOH78_Sc005	199839	T	A	downstream_gene_variant	MODIFIER	L	YJU3	BOH78_1406	BOH78_1406	transcript	ONH76030	protein_coding	c.*494T>A	494	,A	intergenic_region	MODIFIER	BOH78_1406-BOH78_1407	BOH78_1406-BOH78_1407	intergenic_region	BOH78_1406-BOH78_1407	n.199839T>A
BOH78_Sc005	199695	G	A	downstream_gene_variant	MODIFIER	L	YJU3	BOH78_1406	BOH78_1406	transcript	ONH76030	protein_coding	c.*350G>A	350	,A	intergenic_region	MODIFIER	BOH78_1406-BOH78_1407	BOH78_1406-BOH78_1407	intergenic_region	BOH78_1406-BOH78_1407	n.199695G>A
BOH78_Sc005	199745	C	A	downstream_gene_variant	MODIFIER	L	YJU3	BOH78_1406	BOH78_1406	transcript	ONH76030	protein_coding	c.*400C>A	400	,A	intergenic_region	MODIFIER	BOH78_1406-BOH78_1407	BOH78_1406-BOH78_1407	intergenic_region	BOH78_1406-BOH78_1407	n.199745C>A
BOH78_Sc005	199783	G	C	downstream_gene_variant	MODIFIER	L	YJU3	BOH78_1406	BOH78_1406	transcript	ONH76030	protein_coding	c.*438G>C	438	,C	intergenic_region	MODIFIER	BOH78_1406-BOH78_1407	BOH78_1406-BOH78_1407	intergenic_region	BOH78_1406-BOH78_1407	n.199783G>C
BOH78_Sc005	199793	A	C	downstream_gene_variant	MODIFIER	L	YJU3	BOH78_1406	BOH78_1406	transcript	ONH76030	protein_coding	c.*448A>C	448	,C	intergenic_region	MODIFIER	BOH78_1406-BOH78_1407	BOH78_1406-BOH78_1407	intergenic_region	BOH78_1406-BOH78_1407	n.199793A>C
BOH78_Sc005	199365	T	C	downstream_gene_variant	MODIFIER	L	YJU3	BOH78_1406	BOH78_1406	transcript	ONH76030	protein_coding	c.*20T>C	20	,C	intergenic_region	MODIFIER	BOH78_1406-BOH78_1407	BOH78_1406-BOH78_1407	intergenic_region	BOH78_1406-BOH78_1407	n.199365T>C
BOH78_Sc005	199366	A	G	downstream_gene_variant	MODIFIER	L	YJU3	BOH78_1406	BOH78_1406	transcript	ONH76030	protein_coding	c.*21A>G	21	,G	intergenic_region	MODIFIER	BOH78_1406-BOH78_1407	BOH78_1406-BOH78_1407	intergenic_region	BOH78_1406-BOH78_1407	n.199366A>G
BOH78_Sc005	230358	T	C	downstream_gene_variant	MODIFIER	L	FAS2	BOH78_1417	BOH78_1417	transcript	ONH75911	protein_coding	c.*38T>C	38	,C	downstream_gene_variant	MODIFIER	BOH78_1418	BOH78_1418	transcript	ONH75915	protein_coding	c.*274A>G	274	,C	intergenic_region	MODIFIER	BOH78_1417-BOH78_1418	BOH78_1417-BOH78_1418	intergenic_region	BOH78_1417-BOH78_1418	n.230358T>C
BOH78_Sc005	230484	T	G	downstream_gene_variant	MODIFIER	L	FAS2	BOH78_1417	BOH78_1417	transcript	ONH75911	protein_coding	c.*164T>G	164	,G	downstream_gene_variant	MODIFIER	BOH78_1418	BOH78_1418	transcript	ONH75915	protein_coding	c.*148A>C	148	,G	intergenic_region	MODIFIER	BOH78_1417-BOH78_1418	BOH78_1417-BOH78_1418	intergenic_region	BOH78_1417-BOH78_1418	n.230484T>G
BOH78_Sc012	151872	A	G	downstream_gene_variant	MODIFIER	L	POX1	BOH78_2802	BOH78_2802	transcript	ONH73865	protein_coding	c.*262T>C	262	,G	intergenic_region	MODIFIER	BOH78_2801-BOH78_2802	BOH78_2801-BOH78_2802	intergenic_region	BOH78_2801-BOH78_2802	n.151872A>G
BOH78_Sc017	122258	A	G	downstream_gene_variant	MODIFIER	L	AYR1	BOH78_3464	BOH78_3464	transcript	ONH72945	protein_coding	c.*14T>C	14	,G	intergenic_region	MODIFIER	BOH78_3463-BOH78_3464	BOH78_3463-BOH78_3464	intergenic_region	BOH78_3463-BOH78_3464	n.122258A>G
BOH78_Sc029	73292	A	G	downstream_gene_variant	MODIFIER	L	DGA1	BOH78_4317	BOH78_4317	transcript	ONH71739	protein_coding	c.*422A>G	422	,G	intergenic_region	MODIFIER	BOH78_4317-BOH78_4318	BOH78_4317-BOH78_4318	intergenic_region	BOH78_4317-BOH78_4318	n.73292A>G
BOH78_Sc029	73365	G	T	downstream_gene_variant	MODIFIER	L	DGA1	BOH78_4317	BOH78_4317	transcript	ONH71739	protein_coding	c.*495G>T	495	,T	intergenic_region	MODIFIER	BOH78_4317-BOH78_4318	BOH78_4317-BOH78_4318	intergenic_region	BOH78_4317-BOH78_4318	n.73365G>T
BOH78_Sc029	73141	G	A	downstream_gene_variant	MODIFIER	L	DGA1	BOH78_4317	BOH78_4317	transcript	ONH71739	protein_coding	c.*271G>A	271	,A	intergenic_region	MODIFIER	BOH78_4317-BOH78_4318	BOH78_4317-BOH78_4318	intergenic_region	BOH78_4317-BOH78_4318	n.73141G>A
BOH78_Sc029	73245	G	A	downstream_gene_variant	MODIFIER	L	DGA1	BOH78_4317	BOH78_4317	transcript	ONH71739	protein_coding	c.*375G>A	375	,A	intergenic_region	MODIFIER	BOH78_4317-BOH78_4318	BOH78_4317-BOH78_4318	intergenic_region	BOH78_4317-BOH78_4318	n.73245G>A
BOH78_Sc029	73224	C	T	downstream_gene_variant	MODIFIER	L	DGA1	BOH78_4317	BOH78_4317	transcript	ONH71739	protein_coding	c.*354C>T	354	,T	intergenic_region	MODIFIER	BOH78_4317-BOH78_4318	BOH78_4317-BOH78_4318	intergenic_region	BOH78_4317-BOH78_4318	n.73224C>T
BOH78_Sc029	73125	C	T	downstream_gene_variant	MODIFIER	L	DGA1	BOH78_4317	BOH78_4317	transcript	ONH71739	protein_coding	c.*255C>T	255	,T	intergenic_region	MODIFIER	BOH78_4317-BOH78_4318	BOH78_4317-BOH78_4318	intergenic_region	BOH78_4317-BOH78_4318	n.73125C>T
BOH78_Sc029	73126	G	A	downstream_gene_variant	MODIFIER	L	DGA1	BOH78_4317	BOH78_4317	transcript	ONH71739	protein_coding	c.*256G>A	256	,A	intergenic_region	MODIFIER	BOH78_4317-BOH78_4318	BOH78_4317-BOH78_4318	intergenic_region	BOH78_4317-BOH78_4318	n.73126G>A
BOH78_Sc048	26297	G	A	downstream_gene_variant	MODIFIER	L	ARE1, ARE2	BOH78_4880	BOH78_4880	transcript	ONH70915	protein_coding	c.*98G>A	98	,A	intergenic_region	MODIFIER	BOH78_4880-BOH78_4881	BOH78_4880-BOH78_4881	intergenic_region	BOH78_4880-BOH78_4881	n.26297G>A
BOH78_Sc007	98489	G	A	intergenic_region	MODIFIER	L	ELO1, ELO2, ELO3	BOH78_0456, BOH78_1875	BOH78_1875-BOH78_1876	intergenic_region	BOH78_1875-BOH78_1876	n.98489G>A
BOH78_Sc007	98777	T	A	intergenic_region	MODIFIER	L	ELO1, ELO2, ELO3	BOH78_0456, BOH78_1875	BOH78_1875-BOH78_1876	intergenic_region	BOH78_1875-BOH78_1876	n.98777T>A
BOH78_Sc007	98804	T	C	intergenic_region	MODIFIER	L	ELO1, ELO2, ELO3	BOH78_0456, BOH78_1875	BOH78_1875-BOH78_1876	intergenic_region	BOH78_1875-BOH78_1876	n.98804T>C
BOH78_Sc007	99005	T	C	intergenic_region	MODIFIER	L	ELO1, ELO2, ELO3	BOH78_0456, BOH78_1875	BOH78_1875-BOH78_1876	intergenic_region	BOH78_1875-BOH78_1876	n.99005T>C
BOH78_Sc007	99235	T	C	intergenic_region	MODIFIER	L	ELO1, ELO2, ELO3	BOH78_0456, BOH78_1875	BOH78_1875-BOH78_1876	intergenic_region	BOH78_1875-BOH78_1876	n.99235T>C
BOH78_Sc007	98541	C	T	intergenic_region	MODIFIER	L	ELO1, ELO2, ELO3	BOH78_0456, BOH78_1875	BOH78_1875-BOH78_1876	intergenic_region	BOH78_1875-BOH78_1876	n.98541C>T
BOH78_Sc007	98779	C	T	intergenic_region	MODIFIER	L	ELO1, ELO2, ELO3	BOH78_0456, BOH78_1875	BOH78_1875-BOH78_1876	intergenic_region	BOH78_1875-BOH78_1876	n.98779C>T
BOH78_Sc007	98782	C	T	intergenic_region	MODIFIER	L	ELO1, ELO2, ELO3	BOH78_0456, BOH78_1875	BOH78_1875-BOH78_1876	intergenic_region	BOH78_1875-BOH78_1876	n.98782C>T
BOH78_Sc007	98792	C	T	intergenic_region	MODIFIER	L	ELO1, ELO2, ELO3	BOH78_0456, BOH78_1875	BOH78_1875-BOH78_1876	intergenic_region	BOH78_1875-BOH78_1876	n.98792C>T
BOH78_Sc007	99004	C	T	intergenic_region	MODIFIER	L	ELO1, ELO2, ELO3	BOH78_0456, BOH78_1875	BOH78_1875-BOH78_1876	intergenic_region	BOH78_1875-BOH78_1876	n.99004C>T
BOH78_Sc007	98566	C	T	intergenic_region	MODIFIER	L	ELO1, ELO2, ELO3	BOH78_0456, BOH78_1875	BOH78_1875-BOH78_1876	intergenic_region	BOH78_1875-BOH78_1876	n.98566C>T
BOH78_Sc007	99122	C	T	intergenic_region	MODIFIER	L	ELO1, ELO2, ELO3	BOH78_0456, BOH78_1875	BOH78_1875-BOH78_1876	intergenic_region	BOH78_1875-BOH78_1876	n.99122C>T
BOH78_Sc003	107241	T	G	intergenic_region	MODIFIER	L	FAA1, FAA3, FAA4	BOH78_0754	BOH78_0754-BOH78_0755	intergenic_region	BOH78_0754-BOH78_0755	n.107241T>G
BOH78_Sc004	556793	A	G	intergenic_region	MODIFIER	L	ERG13	BOH78_1273	BOH78_1272-BOH78_1273	intergenic_region	BOH78_1272-BOH78_1273	n.556793A>G
BOH78_Sc004	556797	G	C	intergenic_region	MODIFIER	L	ERG13	BOH78_1273	BOH78_1272-BOH78_1273	intergenic_region	BOH78_1272-BOH78_1273	n.556797G>C
BOH78_Sc004	556658	C	T	intergenic_region	MODIFIER	L	ERG13	BOH78_1273	BOH78_1272-BOH78_1273	intergenic_region	BOH78_1272-BOH78_1273	n.556658C>T
BOH78_Sc004	556723	C	T	intergenic_region	MODIFIER	L	ERG13	BOH78_1273	BOH78_1272-BOH78_1273	intergenic_region	BOH78_1272-BOH78_1273	n.556723C>T
BOH78_Sc005	199920	G	A	intergenic_region	MODIFIER	L	YJU3	BOH78_1406	BOH78_1406-BOH78_1407	intergenic_region	BOH78_1406-BOH78_1407	n.199920G>A
BOH78_Sc005	199994	C	T	intergenic_region	MODIFIER	L	YJU3	BOH78_1406	BOH78_1406-BOH78_1407	intergenic_region	BOH78_1406-BOH78_1407	n.199994C>T
BOH78_Sc012	77718	T	C	intergenic_region	MODIFIER	L	YPK1, YPK2	BOH78_2763	BOH78_2763-BOH78_2764	intergenic_region	BOH78_2763-BOH78_2764	n.77718T>C
BOH78_Sc013	125699	G	A	intergenic_region	MODIFIER	L	LCB1	BOH78_2930	BOH78_2930-BOH78_2931	intergenic_region	BOH78_2930-BOH78_2931	n.125699G>A
BOH78_Sc013	125701	G	A	intergenic_region	MODIFIER	L	LCB1	BOH78_2930	BOH78_2930-BOH78_2931	intergenic_region	BOH78_2930-BOH78_2931	n.125701G>A
BOH78_Sc013	125912	G	A	intergenic_region	MODIFIER	L	LCB1	BOH78_2930	BOH78_2930-BOH78_2931	intergenic_region	BOH78_2930-BOH78_2931	n.125912G>A
BOH78_Sc013	126253	T	A	intergenic_region	MODIFIER	L	LCB1	BOH78_2930	BOH78_2930-BOH78_2931	intergenic_region	BOH78_2930-BOH78_2931	n.126253T>A
BOH78_Sc013	126671	G	A	intergenic_region	MODIFIER	L	LCB1	BOH78_2930	BOH78_2930-BOH78_2931	intergenic_region	BOH78_2930-BOH78_2931	n.126671G>A
BOH78_Sc013	126720	G	A	intergenic_region	MODIFIER	L	LCB1	BOH78_2930	BOH78_2930-BOH78_2931	intergenic_region	BOH78_2930-BOH78_2931	n.126720G>A
BOH78_Sc013	127072	T	A	intergenic_region	MODIFIER	L	LCB1	BOH78_2930	BOH78_2930-BOH78_2931	intergenic_region	BOH78_2930-BOH78_2931	n.127072T>A
BOH78_Sc013	126159	T	C	intergenic_region	MODIFIER	L	LCB1	BOH78_2930	BOH78_2930-BOH78_2931	intergenic_region	BOH78_2930-BOH78_2931	n.126159T>C
BOH78_Sc013	126227	T	C	intergenic_region	MODIFIER	L	LCB1	BOH78_2930	BOH78_2930-BOH78_2931	intergenic_region	BOH78_2930-BOH78_2931	n.126227T>C
BOH78_Sc013	127931	T	C	intergenic_region	MODIFIER	L	LCB1	BOH78_2930	BOH78_2930-BOH78_2931	intergenic_region	BOH78_2930-BOH78_2931	n.127931T>C
BOH78_Sc013	126136	T	G	intergenic_region	MODIFIER	L	LCB1	BOH78_2930	BOH78_2930-BOH78_2931	intergenic_region	BOH78_2930-BOH78_2931	n.126136T>G
BOH78_Sc013	126676	A	G	intergenic_region	MODIFIER	L	LCB1	BOH78_2930	BOH78_2930-BOH78_2931	intergenic_region	BOH78_2930-BOH78_2931	n.126676A>G
BOH78_Sc013	127834	A	G	intergenic_region	MODIFIER	L	LCB1	BOH78_2930	BOH78_2930-BOH78_2931	intergenic_region	BOH78_2930-BOH78_2931	n.127834A>G
BOH78_Sc013	125819	A	T	intergenic_region	MODIFIER	L	LCB1	BOH78_2930	BOH78_2930-BOH78_2931	intergenic_region	BOH78_2930-BOH78_2931	n.125819A>T
BOH78_Sc013	126472	C	T	intergenic_region	MODIFIER	L	LCB1	BOH78_2930	BOH78_2930-BOH78_2931	intergenic_region	BOH78_2930-BOH78_2931	n.126472C>T
BOH78_Sc013	127280	A	T	intergenic_region	MODIFIER	L	LCB1	BOH78_2930	BOH78_2930-BOH78_2931	intergenic_region	BOH78_2930-BOH78_2931	n.127280A>T
BOH78_Sc013	127602	C	T	intergenic_region	MODIFIER	L	LCB1	BOH78_2930	BOH78_2930-BOH78_2931	intergenic_region	BOH78_2930-BOH78_2931	n.127602C>T
BOH78_Sc013	127801	A	T	intergenic_region	MODIFIER	L	LCB1	BOH78_2930	BOH78_2930-BOH78_2931	intergenic_region	BOH78_2930-BOH78_2931	n.127801A>T
BOH78_Sc013	126348	C	A	intergenic_region	MODIFIER	L	LCB1	BOH78_2930	BOH78_2930-BOH78_2931	intergenic_region	BOH78_2930-BOH78_2931	n.126348C>A
BOH78_Sc017	124248	G	A	intergenic_region	MODIFIER	L	AYR1	BOH78_3464	BOH78_3464-BOH78_3465	intergenic_region	BOH78_3464-BOH78_3465	n.124248G>A
BOH78_Sc017	124890	C	A	intergenic_region	MODIFIER	L	AYR1	BOH78_3464	BOH78_3464-BOH78_3465	intergenic_region	BOH78_3464-BOH78_3465	n.124890C>A
BOH78_Sc017	126183	G	A	intergenic_region	MODIFIER	L	AYR1	BOH78_3464	BOH78_3464-BOH78_3465	intergenic_region	BOH78_3464-BOH78_3465	n.126183G>A
BOH78_Sc017	126217	C	A	intergenic_region	MODIFIER	L	AYR1	BOH78_3464	BOH78_3464-BOH78_3465	intergenic_region	BOH78_3464-BOH78_3465	n.126217C>A
BOH78_Sc017	126710	G	A	intergenic_region	MODIFIER	L	AYR1	BOH78_3464	BOH78_3464-BOH78_3465	intergenic_region	BOH78_3464-BOH78_3465	n.126710G>A
BOH78_Sc017	125248	T	C	intergenic_region	MODIFIER	L	AYR1	BOH78_3464	BOH78_3464-BOH78_3465	intergenic_region	BOH78_3464-BOH78_3465	n.125248T>C
BOH78_Sc017	126049	T	C	intergenic_region	MODIFIER	L	AYR1	BOH78_3464	BOH78_3464-BOH78_3465	intergenic_region	BOH78_3464-BOH78_3465	n.126049T>C
BOH78_Sc017	126254	G	C	intergenic_region	MODIFIER	L	AYR1	BOH78_3464	BOH78_3464-BOH78_3465	intergenic_region	BOH78_3464-BOH78_3465	n.126254G>C
BOH78_Sc017	126397	T	C	intergenic_region	MODIFIER	L	AYR1	BOH78_3464	BOH78_3464-BOH78_3465	intergenic_region	BOH78_3464-BOH78_3465	n.126397T>C
BOH78_Sc017	127001	G	C	intergenic_region	MODIFIER	L	AYR1	BOH78_3464	BOH78_3464-BOH78_3465	intergenic_region	BOH78_3464-BOH78_3465	n.127001G>C
BOH78_Sc017	124123	A	G	intergenic_region	MODIFIER	L	AYR1	BOH78_3464	BOH78_3464-BOH78_3465	intergenic_region	BOH78_3464-BOH78_3465	n.124123A>G
BOH78_Sc017	124867	A	G	intergenic_region	MODIFIER	L	AYR1	BOH78_3464	BOH78_3464-BOH78_3465	intergenic_region	BOH78_3464-BOH78_3465	n.124867A>G
BOH78_Sc017	124871	T	G	intergenic_region	MODIFIER	L	AYR1	BOH78_3464	BOH78_3464-BOH78_3465	intergenic_region	BOH78_3464-BOH78_3465	n.124871T>G
BOH78_Sc017	125103	A	G	intergenic_region	MODIFIER	L	AYR1	BOH78_3464	BOH78_3464-BOH78_3465	intergenic_region	BOH78_3464-BOH78_3465	n.125103A>G
BOH78_Sc017	125192	A	G	intergenic_region	MODIFIER	L	AYR1	BOH78_3464	BOH78_3464-BOH78_3465	intergenic_region	BOH78_3464-BOH78_3465	n.125192A>G
BOH78_Sc017	125599	T	G	intergenic_region	MODIFIER	L	AYR1	BOH78_3464	BOH78_3464-BOH78_3465	intergenic_region	BOH78_3464-BOH78_3465	n.125599T>G
BOH78_Sc017	125639	A	G	intergenic_region	MODIFIER	L	AYR1	BOH78_3464	BOH78_3464-BOH78_3465	intergenic_region	BOH78_3464-BOH78_3465	n.125639A>G
BOH78_Sc017	126220	A	G	intergenic_region	MODIFIER	L	AYR1	BOH78_3464	BOH78_3464-BOH78_3465	intergenic_region	BOH78_3464-BOH78_3465	n.126220A>G
BOH78_Sc017	124651	C	T	intergenic_region	MODIFIER	L	AYR1	BOH78_3464	BOH78_3464-BOH78_3465	intergenic_region	BOH78_3464-BOH78_3465	n.124651C>T
BOH78_Sc017	125437	C	T	intergenic_region	MODIFIER	L	AYR1	BOH78_3464	BOH78_3464-BOH78_3465	intergenic_region	BOH78_3464-BOH78_3465	n.125437C>T
BOH78_Sc017	125790	G	T	intergenic_region	MODIFIER	L	AYR1	BOH78_3464	BOH78_3464-BOH78_3465	intergenic_region	BOH78_3464-BOH78_3465	n.125790G>T
BOH78_Sc017	126154	A	T	intergenic_region	MODIFIER	L	AYR1	BOH78_3464	BOH78_3464-BOH78_3465	intergenic_region	BOH78_3464-BOH78_3465	n.126154A>T
BOH78_Sc017	126299	A	T	intergenic_region	MODIFIER	L	AYR1	BOH78_3464	BOH78_3464-BOH78_3465	intergenic_region	BOH78_3464-BOH78_3465	n.126299A>T
BOH78_Sc017	126444	G	T	intergenic_region	MODIFIER	L	AYR1	BOH78_3464	BOH78_3464-BOH78_3465	intergenic_region	BOH78_3464-BOH78_3465	n.126444G>T
BOH78_Sc017	126266	A	T	intergenic_region	MODIFIER	L	AYR1	BOH78_3464	BOH78_3464-BOH78_3465	intergenic_region	BOH78_3464-BOH78_3465	n.126266A>T
BOH78_Sc017	125311	C	A	intergenic_region	MODIFIER	L	AYR1	BOH78_3464	BOH78_3464-BOH78_3465	intergenic_region	BOH78_3464-BOH78_3465	n.125311C>A
BOH78_Sc029	73799	T	C	intergenic_region	MODIFIER	L	DGA1	BOH78_4317	BOH78_4317-BOH78_4318	intergenic_region	BOH78_4317-BOH78_4318	n.73799T>C
BOH78_Sc029	73878	A	C	intergenic_region	MODIFIER	L	DGA1	BOH78_4317	BOH78_4317-BOH78_4318	intergenic_region	BOH78_4317-BOH78_4318	n.73878A>C
BOH78_Sc029	73809	A	G	intergenic_region	MODIFIER	L	DGA1	BOH78_4317	BOH78_4317-BOH78_4318	intergenic_region	BOH78_4317-BOH78_4318	n.73809A>G
BOH78_Sc029	73520	A	T	intergenic_region	MODIFIER	L	DGA1	BOH78_4317	BOH78_4317-BOH78_4318	intergenic_region	BOH78_4317-BOH78_4318	n.73520A>T
BOH78_Sc029	74302	A	C	intergenic_region	MODIFIER	L	DGA1	BOH78_4317	BOH78_4317-BOH78_4318	intergenic_region	BOH78_4317-BOH78_4318	n.74302A>C
BOH78_Sc029	73917	C	T	intergenic_region	MODIFIER	L	DGA1	BOH78_4317	BOH78_4317-BOH78_4318	intergenic_region	BOH78_4317-BOH78_4318	n.73917C>T
BOH78_Sc029	74142	G	A	intergenic_region	MODIFIER	L	DGA1	BOH78_4317	BOH78_4317-BOH78_4318	intergenic_region	BOH78_4317-BOH78_4318	n.74142G>A
BOH78_Sc029	74265	A	C	intergenic_region	MODIFIER	L	DGA1	BOH78_4317	BOH78_4317-BOH78_4318	intergenic_region	BOH78_4317-BOH78_4318	n.74265A>C
BOH78_Sc029	73460	C	G	intergenic_region	MODIFIER	L	DGA1	BOH78_4317	BOH78_4317-BOH78_4318	intergenic_region	BOH78_4317-BOH78_4318	n.73460C>G
BOH78_Sc029	73725	G	T	intergenic_region	MODIFIER	L	DGA1	BOH78_4317	BOH78_4317-BOH78_4318	intergenic_region	BOH78_4317-BOH78_4318	n.73725G>T
BOH78_Sc029	73863	G	A	intergenic_region	MODIFIER	L	DGA1	BOH78_4317	BOH78_4317-BOH78_4318	intergenic_region	BOH78_4317-BOH78_4318	n.73863G>A
BOH78_Sc029	73376	T	G	intergenic_region	MODIFIER	L	DGA1	BOH78_4317	BOH78_4317-BOH78_4318	intergenic_region	BOH78_4317-BOH78_4318	n.73376T>G
BOH78_Sc029	73387	G	A	intergenic_region	MODIFIER	L	DGA1	BOH78_4317	BOH78_4317-BOH78_4318	intergenic_region	BOH78_4317-BOH78_4318	n.73387G>A
BOH78_Sc029	74073	C	T	intergenic_region	MODIFIER	L	DGA1	BOH78_4317	BOH78_4317-BOH78_4318	intergenic_region	BOH78_4317-BOH78_4318	n.74073C>T
BOH78_Sc029	74086	T	G	intergenic_region	MODIFIER	L	DGA1	BOH78_4317	BOH78_4317-BOH78_4318	intergenic_region	BOH78_4317-BOH78_4318	n.74086T>G
BOH78_Sc015	92256	G	T	intron_variant	MODIFIER	L	TGL1	BOH78_1108, BOH78_3203, BOH78_5157	BOH78_3203	transcript	ONH73359	protein_coding	2023-03-01	c.1320-24G>T
BOH78_Sc005	224068	C	T	intron_variant	MODIFIER	L	FAS2	BOH78_1417	BOH78_1417	transcript	ONH75911	protein_coding	2023-01-01	c.1184-158C>T
BOH78_Sc029	71251	A	G	intron_variant	MODIFIER	L	DGA1	BOH78_4317	BOH78_4317	transcript	ONH71739	protein_coding	2023-01-01	c.1229+100A>G
BOH78_Sc002	218414	G	A	missense_variant	MODERATE	L	ELO1, ELO2, ELO3	BOH78_0456, BOH78_1875	BOH78_0456	transcript	ONH77331	protein_coding	2023-01-01	c.292G>A	p.Val98Ile	292/915	292/915	98/304
BOH78_Sc002	218183	A	G	missense_variant	MODERATE	L	ELO1, ELO2, ELO3	BOH78_0456, BOH78_1875	BOH78_0456	transcript	ONH77331	protein_coding	2023-01-01	c.61A>G	p.Thr21Ala	61/915	61/915	21/304
BOH78_Sc002	592792	G	A	missense_variant	MODERATE	L	TGL4, TGL5,	BOH78_0638	BOH78_0638	transcript	ONH77074	protein_coding	2023-01-01	c.1342C>T	p.Pro448Ser	1342/2067	1342/2067	448/688
BOH78_Sc002	592221	G	T	missense_variant	MODERATE	L	TGL4, TGL5,	BOH78_0638	BOH78_0638	transcript	ONH77074	protein_coding	2023-01-01	c.1913C>A	p.Thr638Asn	1913/2067	1913/2067	638/688
BOH78_Sc002	593955	C	T	missense_variant	MODERATE	L	TGL4, TGL5,	BOH78_0638	BOH78_0638	transcript	ONH77074	protein_coding	2023-01-01	c.179G>A	p.Ser60Asn	179/2067	179/2067	60/688	,T	downstream_gene_variant	MODIFIER	BOH78_0639	BOH78_0639	transcript	ONH77073	protein_coding	c.*233G>A	233
BOH78_Sc002	592258	T	A	missense_variant	MODERATE	L	TGL4, TGL5,	BOH78_0638	BOH78_0638	transcript	ONH77074	protein_coding	2023-01-01	c.1876A>T	p.Ile626Phe	1876/2067	1876/2067	626/688
BOH78_Sc003	23526	C	T	missense_variant	MODERATE	L	TGL3	BOH78_0712	BOH78_0712	transcript	ONH76835	protein_coding	2023-02-01	c.121G>A	p.Ala41Thr	121/720	121/720	41/239
BOH78_Sc003	105439	A	G	missense_variant	MODERATE	L	FAA1, FAA3, FAA4	BOH78_0754	BOH78_0754	transcript	ONH76885	protein_coding	2023-01-01	c.1178T>C	p.Val393Ala	1178/2109	1178/2109	393/702
BOH78_Sc004	108376	G	A	missense_variant	MODERATE	L	ACC1, HFA1	BOH78_1078	BOH78_1078	transcript	ONH76354	protein_coding	2023-01-01	c.3677G>A	p.Arg1226Lys	3677/6636	3677/6636	1226/2211
BOH78_Sc004	108015	G	A	missense_variant	MODERATE	L	ACC1, HFA1	BOH78_1078	BOH78_1078	transcript	ONH76354	protein_coding	2023-01-01	c.3316G>A	p.Val1106Ile	3316/6636	3316/6636	1106/2211
BOH78_Sc015	92398	C	A	missense_variant	MODERATE	L	TGL1	BOH78_1108, BOH78_3203, BOH78_5157	BOH78_3203	transcript	ONH73359	protein_coding	2023-04-02	c.1438C>A	p.Leu480Ile	1438/2223	1438/2223	480/740
BOH78_Sc004	405223	G	T	missense_variant	MODERATE	L	YDC1, YPC1	BOH78_1210	BOH78_1210	transcript	ONH76270	protein_coding	2023-01-01	c.313G>T	p.Ala105Ser	313/837	313/837	105/278
BOH78_Sc005	8089	T	C	missense_variant	MODERATE	L	MFE1(FOX2)	BOH78_1320	BOH78_1320	transcript	ONH75833	protein_coding	2023-01-01	c.5T>C	p.Val2Ala	2742-05-01	2742-05-01	2/913
BOH78_Sc005	9625	C	T	missense_variant	MODERATE	L	MFE1(FOX2)	BOH78_1320	BOH78_1320	transcript	ONH75833	protein_coding	2023-01-01	c.1541C>T	p.Ser514Leu	1541/2742	1541/2742	514/913
BOH78_Sc005	10260	G	A	missense_variant	MODERATE	L	MFE1(FOX2)	BOH78_1320	BOH78_1320	transcript	ONH75833	protein_coding	2023-01-01	c.2176G>A	p.Ala726Thr	2176/2742	2176/2742	726/913
BOH78_Sc005	10807	A	G	missense_variant	MODERATE	L	MFE1(FOX2)	BOH78_1320	BOH78_1320	transcript	ONH75833	protein_coding	2023-01-01	c.2723A>G	p.Glu908Gly	2723/2742	2723/2742	908/913	,G	downstream_gene_variant	MODIFIER	BOH78_1321	BOH78_1321	transcript	ONH75834	protein_coding	c.*80T>C	80
BOH78_Sc005	226674	G	A	missense_variant	MODERATE	L	FAS2	BOH78_1417	BOH78_1417	transcript	ONH75911	protein_coding	2023-02-02	c.3632G>A	p.Arg1211Lys	3632/7278	3632/7278	1211/2425
BOH78_Sc005	228029	T	A	missense_variant	MODERATE	L	FAS2	BOH78_1417	BOH78_1417	transcript	ONH75911	protein_coding	2023-02-02	c.4987T>A	p.Phe1663Ile	4987/7278	4987/7278	1663/2425
BOH78_Sc005	226683	T	C	missense_variant	MODERATE	L	FAS2	BOH78_1417	BOH78_1417	transcript	ONH75911	protein_coding	2023-02-02	c.3641T>C	p.Ile1214Thr	3641/7278	3641/7278	1214/2425
BOH78_Sc005	227086	T	G	missense_variant	MODERATE	L	FAS2	BOH78_1417	BOH78_1417	transcript	ONH75911	protein_coding	2023-02-02	c.4044T>G	p.Ser1348Arg	4044/7278	4044/7278	1348/2425
BOH78_Sc005	229787	G	C	missense_variant	MODERATE	L	FAS2	BOH78_1417	BOH78_1417	transcript	ONH75911	protein_coding	2023-02-02	c.6745G>C	p.Asp2249His	6745/7278	6745/7278	2249/2425
BOH78_Sc010	130800	C	T	missense_variant	MODERATE	L	FAS1	BOH78_2482	BOH78_2482	transcript	ONH74293	protein_coding	2023-01-01	c.3743C>T	p.Ser1248Phe	3743/6174	3743/6174	1248/2057
BOH78_Sc010	356090	G	A	missense_variant	MODERATE	L	SLC1, SWS2	BOH78_2572, BOH78_2573	BOH78_2572	transcript	ONH74337	protein_coding	2023-02-01	c.322G>A	p.Ala108Thr	322/1575	322/1575	108/524
BOH78_Sc010	356851	G	T	missense_variant	MODERATE	L	SLC1, SWS2	BOH78_2572, BOH78_2573	BOH78_2572	transcript	ONH74337	protein_coding	2023-02-01	c.1083G>T	p.Gln361His	1083/1575	1083/1575	361/524
BOH78_Sc010	356759	A	G	missense_variant	MODERATE	L	SLC1, SWS2	BOH78_2572, BOH78_2573	BOH78_2572	transcript	ONH74337	protein_coding	2023-02-01	c.991A>G	p.Ser331Gly	991/1575	991/1575	331/524
BOH78_Sc010	356295	G	T	missense_variant	MODERATE	L	SLC1, SWS2	BOH78_2572, BOH78_2573	BOH78_2572	transcript	ONH74337	protein_coding	2023-02-01	c.527G>T	p.Arg176Ile	527/1575	527/1575	176/524
BOH78_Sc011	84239	A	T	missense_variant	MODERATE	L	TGL2	BOH78_2616	BOH78_2616	transcript	ONH74100	protein_coding	2023-01-01	c.292A>T	p.Ser98Cys	292/969	292/969	98/322
BOH78_Sc012	154169	G	C	missense_variant	MODERATE	L	POX1	BOH78_2802	BOH78_2802	transcript	ONH73865	protein_coding	2023-01-01	c.71C>G	p.Ala24Gly	71/2106	71/2106	24/701
BOH78_Sc013	124691	A	G	missense_variant	MODERATE	L	LCB1	BOH78_2930	BOH78_2930	transcript	ONH73714	protein_coding	2023-01-01	c.1499A>G	p.Glu500Gly	1499/1677	1499/1677	500/558
BOH78_Sc013	124790	T	G	missense_variant	MODERATE	L	LCB1	BOH78_2930	BOH78_2930	transcript	ONH73714	protein_coding	2023-01-01	c.1598T>G	p.Met533Arg	1598/1677	1598/1677	533/558
BOH78_Sc016	66360	T	G	missense_variant	MODERATE	L	SCT1	BOH78_3328	BOH78_3328	transcript	ONH73163	protein_coding	2023-01-01	c.1282A>C	p.Ile428Leu	1282/2172	1282/2172	428/723
BOH78_Sc016	65490	G	C	missense_variant	MODERATE	L	SCT1	BOH78_3328	BOH78_3328	transcript	ONH73163	protein_coding	2023-01-01	c.2152C>G	p.Gln718Glu	2152/2172	2152/2172	718/723	,C	downstream_gene_variant	MODIFIER	BOH78_3327	BOH78_3327	transcript	ONH73162	protein_coding	c.*125G>C	125
BOH78_Sc016	189412	G	A	missense_variant	MODERATE	L	POT1	BOH78_3388	BOH78_3388	transcript	ONH73084	protein_coding	2023-01-01	c.1070G>A	p.Arg357Gln	1070/1260	1070/1260	357/419
BOH78_Sc016	189054	A	G	missense_variant	MODERATE	L	POT1	BOH78_3388	BOH78_3388	transcript	ONH73084	protein_coding	2023-01-01	c.712A>G	p.Lys238Glu	712/1260	712/1260	238/419
BOH78_Sc017	122550	T	C	missense_variant	MODERATE	L	AYR1	BOH78_3464	BOH78_3464	transcript	ONH72945	protein_coding	2023-01-01	c.589A>G	p.Asn197Asp	589/867	589/867	197/288
BOH78_Sc017	122292	T	G	missense_variant	MODERATE	L	AYR1	BOH78_3464	BOH78_3464	transcript	ONH72945	protein_coding	2023-01-01	c.847A>C	p.Ser283Arg	847/867	847/867	283/288
BOH78_Sc017	122426	C	T	missense_variant	MODERATE	L	AYR1	BOH78_3464	BOH78_3464	transcript	ONH72945	protein_coding	2023-01-01	c.713G>A	p.Gly238Asp	713/867	713/867	238/288
BOH78_Sc017	122340	C	T	missense_variant	MODERATE	L	AYR1	BOH78_3464	BOH78_3464	transcript	ONH72945	protein_coding	2023-01-01	c.799G>A	p.Ala267Thr	799/867	799/867	267/288
BOH78_Sc025	67779	A	T	missense_variant	MODERATE	L	YEH1, YEH2	BOH78_4105	BOH78_4105	transcript	ONH72026	protein_coding	2023-01-01	c.133T>A	p.Tyr45Asn	133/849	133/849	45/282
BOH78_Sc029	72807	T	G	missense_variant	MODERATE	L	DGA1	BOH78_4317	BOH78_4317	transcript	ONH71739	protein_coding	2023-02-02	c.2652T>G	p.Ser884Arg	2652/2715	2652/2715	884/904
BOH78_Sc029	71682	C	G	missense_variant	MODERATE	L	DGA1	BOH78_4317	BOH78_4317	transcript	ONH71739	protein_coding	2023-02-02	c.1527C>G	p.Cys509Trp	1527/2715	1527/2715	509/904
BOH78_Sc029	72535	T	C	missense_variant	MODERATE	L	DGA1	BOH78_4317	BOH78_4317	transcript	ONH71739	protein_coding	2023-02-02	c.2380T>C	p.Ser794Pro	2380/2715	2380/2715	794/904
BOH78_Sc029	71043	G	A	missense_variant	MODERATE	L	DGA1	BOH78_4317	BOH78_4317	transcript	ONH71739	protein_coding	2023-02-01	c.1121G>A	p.Arg374Lys	1121/2715	1121/2715	374/904
BOH78_Sc038	41592	G	A	missense_variant	MODERATE	L	FAT1	BOH78_4620	BOH78_4620	transcript	ONH71276	protein_coding	2023-01-01	c.2003G>A	p.Arg668Lys	2003/2115	2003/2115	668/704	,A	upstream_gene_variant	MODIFIER	BOH78_4621	BOH78_4621	transcript	ONH71277	protein_coding	c.-441G>A	441
BOH78_Sc038	40352	C	T	missense_variant	MODERATE	L	FAT1	BOH78_4620	BOH78_4620	transcript	ONH71276	protein_coding	2023-01-01	c.763C>T	p.His255Tyr	763/2115	763/2115	255/704
BOH78_Sc048	26108	A	G	missense_variant	MODERATE	L	ARE1, ARE3	BOH78_4881	BOH78_4880	transcript	ONH70915	protein_coding	2023-02-01	c.970A>G	p.Ser324Gly	970/1038	970/1038	324/345
BOH78_Sc048	25239	A	T	missense_variant	MODERATE	L	ARE1, ARE4	BOH78_4882	BOH78_4880	transcript	ONH70915	protein_coding	2023-02-01	c.101A>T	p.Asn34Ile	101/1038	101/1038	34/345	,T	upstream_gene_variant	MODIFIER	BOH78_4879	BOH78_4879	transcript	ONH70909	protein_coding	c.-487T>A	487
BOH78_Sc001	334282	G	A	synonymous_variant	LOW	L	LCB2	BOH78_0164	BOH78_0164	transcript	ONH77659	protein_coding	2023-01-01	c.456C>T	p.Phe152Phe	456/1713	456/1713	152/570
BOH78_Sc001	345651	A	G	synonymous_variant	LOW	L	GPD1, GPD2	BOH78_0171	BOH78_0171	transcript	ONH77843	protein_coding	2023-01-01	c.402A>G	p.Leu134Leu	402/1167	402/1167	134/388
BOH78_Sc001	345618	C	T	synonymous_variant	LOW	L	GPD1, GPD2	BOH78_0171	BOH78_0171	transcript	ONH77843	protein_coding	2023-01-01	c.369C>T	p.Phe123Phe	369/1167	369/1167	123/388
BOH78_Sc001	346209	A	G	synonymous_variant	LOW	L	GPD1, GPD2	BOH78_0171	BOH78_0171	transcript	ONH77843	protein_coding	2023-01-01	c.960A>G	p.Gln320Gln	960/1167	960/1167	320/388
BOH78_Sc001	345271	T	C	synonymous_variant	LOW	L	GPD1, GPD2	BOH78_0171+I8	BOH78_0171	transcript	ONH77843	protein_coding	2023-01-01	c.22T>C	p.Leu8Leu	22/1167	22/1167	8/388
BOH78_Sc007	97321	G	A	synonymous_variant	LOW	L	ELO1, ELO2, ELO3	BOH78_0456, BOH78_1875	BOH78_1875	transcript	ONH75160	protein_coding	2023-01-01	c.618C>T	p.Phe206Phe	618/978	618/978	206/325
BOH78_Sc002	592112	T	C	synonymous_variant	LOW	L	TGL4, TGL5,	BOH78_0638	BOH78_0638	transcript	ONH77074	protein_coding	2023-01-01	c.2022A>G	p.Gln674Gln	2022/2067	2022/2067	674/688
BOH78_Sc003	23200	G	A	synonymous_variant	LOW	L	TGL3	BOH78_0712	BOH78_0712	transcript	ONH76835	protein_coding	2023-02-01	c.447C>T	p.Asp149Asp	447/720	447/720	149/239
BOH78_Sc003	105468	A	C	synonymous_variant	LOW	L	FAA1, FAA3, FAA4	BOH78_0754	BOH78_0754	transcript	ONH76885	protein_coding	2023-01-01	c.1149T>G	p.Thr383Thr	1149/2109	1149/2109	383/702
BOH78_Sc003	105186	A	T	synonymous_variant	LOW	L	FAA1, FAA3, FAA4	BOH78_0754	BOH78_0754	transcript	ONH76885	protein_coding	2023-01-01	c.1431T>A	p.Gly477Gly	1431/2109	1431/2109	477/702
BOH78_Sc003	105354	G	T	synonymous_variant	LOW	L	FAA1, FAA3, FAA4	BOH78_0754	BOH78_0754	transcript	ONH76885	protein_coding	2023-01-01	c.1263C>A	p.Thr421Thr	1263/2109	1263/2109	421/702
BOH78_Sc003	105840	G	A	synonymous_variant	LOW	L	FAA1, FAA3, FAA4	BOH78_0754	BOH78_0754	transcript	ONH76885	protein_coding	2023-01-01	c.777C>T	p.Asp259Asp	777/2109	777/2109	259/702
BOH78_Sc003	105645	G	A	synonymous_variant	LOW	L	FAA1, FAA3, FAA4	BOH78_0754	BOH78_0754	transcript	ONH76885	protein_coding	2023-01-01	c.972C>T	p.Phe324Phe	972/2109	972/2109	324/702
BOH78_Sc003	105135	G	A	synonymous_variant	LOW	L	FAA1, FAA3, FAA4	BOH78_0754	BOH78_0754	transcript	ONH76885	protein_coding	2023-01-01	c.1482C>T	p.Gly494Gly	1482/2109	1482/2109	494/702
BOH78_Sc004	104837	G	A	synonymous_variant	LOW	L	ACC1, HFA1	BOH78_1078	BOH78_1078	transcript	ONH76354	protein_coding	2023-01-01	c.138G>A	p.Lys46Lys	138/6636	138/6636	46/2211
BOH78_Sc004	108950	T	C	synonymous_variant	LOW	L	ACC1, HFA1	BOH78_1078	BOH78_1078	transcript	ONH76354	protein_coding	2023-01-01	c.4251T>C	p.Phe1417Phe	4251/6636	4251/6636	1417/2211
BOH78_Sc004	109502	C	T	synonymous_variant	LOW	L	ACC1, HFA1	BOH78_1078	BOH78_1078	transcript	ONH76354	protein_coding	2023-01-01	c.4803C>T	p.Ser1601Ser	4803/6636	4803/6636	1601/2211
BOH78_Sc004	105992	G	A	synonymous_variant	LOW	L	ACC1, HFA1	BOH78_1078	BOH78_1078	transcript	ONH76354	protein_coding	2023-01-01	c.1293G>A	p.Arg431Arg	1293/6636	1293/6636	431/2211
BOH78_Sc004	105785	T	C	synonymous_variant	LOW	L	ACC1, HFA1	BOH78_1078	BOH78_1078	transcript	ONH76354	protein_coding	2023-01-01	c.1086T>C	p.Phe362Phe	1086/6636	1086/6636	362/2211
BOH78_Sc004	105818	C	T	synonymous_variant	LOW	L	ACC1, HFA1	BOH78_1078	BOH78_1078	transcript	ONH76354	protein_coding	2023-01-01	c.1119C>T	p.His373His	1119/6636	1119/6636	373/2211
BOH78_Sc004	106281	T	C	synonymous_variant	LOW	L	ACC1, HFA1	BOH78_1078	BOH78_1078	transcript	ONH76354	protein_coding	2023-01-01	c.1582T>C	p.Leu528Leu	1582/6636	1582/6636	528/2211
BOH78_Sc004	110351	G	A	synonymous_variant	LOW	L	ACC1, HFA1	BOH78_1078	BOH78_1078	transcript	ONH76354	protein_coding	2023-01-01	c.5652G>A	p.Ala1884Ala	5652/6636	5652/6636	1884/2211
BOH78_Sc004	108089	T	C	synonymous_variant	LOW	L	ACC1, HFA1	BOH78_1078	BOH78_1078	transcript	ONH76354	protein_coding	2023-01-01	c.3390T>C	p.Phe1130Phe	3390/6636	3390/6636	1130/2211
BOH78_Sc015	91123	T	C	synonymous_variant	LOW	L	TGL1	BOH78_1108, BOH78_3203, BOH78_5157	BOH78_3203	transcript	ONH73359	protein_coding	2023-04-01	c.832T>C	p.Leu278Leu	832/2223	832/2223	278/740
BOH78_Sc004	405129	A	T	synonymous_variant	LOW	L	YDC1, YPC1	BOH78_1210	BOH78_1210	transcript	ONH76270	protein_coding	2023-01-01	c.219A>T	p.Gly73Gly	219/837	219/837	73/278
BOH78_Sc004	558298	C	T	synonymous_variant	LOW	L	ERG13	BOH78_1273	BOH78_1273	transcript	ONH76246	protein_coding	2023-01-01	c.987C>T	p.Thr329Thr	987/1341	987/1341	329/446
BOH78_Sc004	558334	C	A	synonymous_variant	LOW	L	ERG13	BOH78_1273	BOH78_1273	transcript	ONH76246	protein_coding	2023-01-01	c.1023C>A	p.Ser341Ser	1023/1341	1023/1341	341/446
BOH78_Sc005	8930	T	A	synonymous_variant	LOW	L	MFE1(FOX2)	BOH78_1320	BOH78_1320	transcript	ONH75833	protein_coding	2023-01-01	c.846T>A	p.Gly282Gly	846/2742	846/2742	282/913
BOH78_Sc005	8855	G	A	synonymous_variant	LOW	L	MFE1(FOX2)	BOH78_1320	BOH78_1320	transcript	ONH75833	protein_coding	2023-01-01	c.771G>A	p.Leu257Leu	771/2742	771/2742	257/913
BOH78_Sc005	9638	G	C	synonymous_variant	LOW	L	MFE1(FOX2)	BOH78_1320	BOH78_1320	transcript	ONH75833	protein_coding	2023-01-01	c.1554G>C	p.Pro518Pro	1554/2742	1554/2742	518/913
BOH78_Sc005	10514	T	C	synonymous_variant	LOW	L	MFE1(FOX2)	BOH78_1320	BOH78_1320	transcript	ONH75833	protein_coding	2023-01-01	c.2430T>C	p.Arg810Arg	2430/2742	2430/2742	810/913	,C	downstream_gene_variant	MODIFIER	BOH78_1321	BOH78_1321	transcript	ONH75834	protein_coding	c.*373A>G	373
BOH78_Sc005	8726	G	T	synonymous_variant	LOW	L	MFE1(FOX2)	BOH78_1320	BOH78_1320	transcript	ONH75833	protein_coding	2023-01-01	c.642G>T	p.Ser214Ser	642/2742	642/2742	214/913
BOH78_Sc005	198562	A	G	synonymous_variant	LOW	L	YJU3	BOH78_1406	BOH78_1406	transcript	ONH76030	protein_coding	2023-01-01	c.159A>G	p.Arg53Arg	159/942	159/942	53/313
BOH78_Sc005	199183	C	T	synonymous_variant	LOW	L	YJU3	BOH78_1406	BOH78_1406	transcript	ONH76030	protein_coding	2023-01-01	c.780C>T	p.Phe260Phe	780/942	780/942	260/313
BOH78_Sc005	198832	A	G	synonymous_variant	LOW	L	YJU3	BOH78_1406	BOH78_1406	transcript	ONH76030	protein_coding	2023-01-01	c.429A>G	p.Lys143Lys	429/942	429/942	143/313
BOH78_Sc005	228115	T	C	synonymous_variant	LOW	L	FAS2	BOH78_1417	BOH78_1417	transcript	ONH75911	protein_coding	2023-02-02	c.5073T>C	p.Phe1691Phe	5073/7278	5073/7278	1691/2425
BOH78_Sc005	226459	C	T	synonymous_variant	LOW	L	FAS2	BOH78_1417	BOH78_1417	transcript	ONH75911	protein_coding	2023-02-02	c.3417C>T	p.Asp1139Asp	3417/7278	3417/7278	1139/2425
BOH78_Sc005	228178	G	T	synonymous_variant	LOW	L	FAS2	BOH78_1417	BOH78_1417	transcript	ONH75911	protein_coding	2023-02-02	c.5136G>T	p.Pro1712Pro	5136/7278	5136/7278	1712/2425
BOH78_Sc005	229096	C	T	synonymous_variant	LOW	L	FAS2	BOH78_1417	BOH78_1417	transcript	ONH75911	protein_coding	2023-02-02	c.6054C>T	p.Ala2018Ala	6054/7278	6054/7278	2018/2425
BOH78_Sc005	226207	T	C	synonymous_variant	LOW	L	FAS2	BOH78_1417	BOH78_1417	transcript	ONH75911	protein_coding	2023-02-02	c.3165T>C	p.Asn1055Asn	3165/7278	3165/7278	1055/2425
BOH78_Sc005	225937	T	C	synonymous_variant	LOW	L	FAS2	BOH78_1417	BOH78_1417	transcript	ONH75911	protein_coding	2023-02-02	c.2895T>C	p.Phe965Phe	2895/7278	2895/7278	965/2425
BOH78_Sc005	229004	C	T	synonymous_variant	LOW	L	FAS2	BOH78_1417	BOH78_1417	transcript	ONH75911	protein_coding	2023-02-02	c.5962C>T	p.Leu1988Leu	5962/7278	5962/7278	1988/2425
BOH78_Sc005	229939	C	T	synonymous_variant	LOW	L	FAS2	BOH78_1417	BOH78_1417	transcript	ONH75911	protein_coding	2023-02-02	c.6897C>T	p.Thr2299Thr	6897/7278	6897/7278	2299/2425
BOH78_Sc005	226639	C	T	synonymous_variant	LOW	L	FAS2	BOH78_1417	BOH78_1417	transcript	ONH75911	protein_coding	2023-02-02	c.3597C>T	p.Gly1199Gly	3597/7278	3597/7278	1199/2425
BOH78_Sc005	226270	G	A	synonymous_variant	LOW	L	FAS2	BOH78_1417	BOH78_1417	transcript	ONH75911	protein_coding	2023-02-02	c.3228G>A	p.Lys1076Lys	3228/7278	3228/7278	1076/2425
BOH78_Sc005	224719	T	A	synonymous_variant	LOW	L	FAS2	BOH78_1417	BOH78_1417	transcript	ONH75911	protein_coding	2023-02-02	c.1677T>A	p.Pro559Pro	1677/7278	1677/7278	559/2425
BOH78_Sc005	229576	C	T	synonymous_variant	LOW	L	FAS2	BOH78_1417	BOH78_1417	transcript	ONH75911	protein_coding	2023-02-02	c.6534C>T	p.Ala2178Ala	6534/7278	6534/7278	2178/2425
BOH78_Sc010	128254	T	C	synonymous_variant	LOW	L	FAS1	BOH78_2482	BOH78_2482	transcript	ONH74293	protein_coding	2023-01-01	c.1197T>C	p.Ala399Ala	1197/6174	1197/6174	399/2057
BOH78_Sc010	133192	C	T	synonymous_variant	LOW	L	FAS1	BOH78_2482	BOH78_2482	transcript	ONH74293	protein_coding	2023-01-01	c.6135C>T	p.Ile2045Ile	6135/6174	6135/6174	2045/2057
BOH78_Sc010	127459	T	C	synonymous_variant	LOW	L	FAS1	BOH78_2482	BOH78_2482	transcript	ONH74293	protein_coding	2023-01-01	c.402T>C	p.His134His	402/6174	402/6174	134/2057
BOH78_Sc010	132673	T	C	synonymous_variant	LOW	L	FAS1	BOH78_2482	BOH78_2482	transcript	ONH74293	protein_coding	2023-01-01	c.5616T>C	p.Thr1872Thr	5616/6174	5616/6174	1872/2057
BOH78_Sc010	127393	G	A	synonymous_variant	LOW	L	FAS1	BOH78_2482	BOH78_2482	transcript	ONH74293	protein_coding	2023-01-01	c.336G>A	p.Pro112Pro	336/6174	336/6174	112/2057
BOH78_Sc010	131554	T	C	synonymous_variant	LOW	L	FAS1	BOH78_2482	BOH78_2482	transcript	ONH74293	protein_coding	2023-01-01	c.4497T>C	p.Thr1499Thr	4497/6174	4497/6174	1499/2057
BOH78_Sc010	356194	G	A	synonymous_variant	LOW	L	SLC1, SWS2	BOH78_2572, BOH78_2573	BOH78_2572	transcript	ONH74337	protein_coding	2023-02-01	c.426G>A	p.Arg142Arg	426/1575	426/1575	142/524
BOH78_Sc010	355840	T	C	synonymous_variant	LOW	L	SLC1, SWS2	BOH78_2572, BOH78_2573	BOH78_2572	transcript	ONH74337	protein_coding	2023-02-01	c.72T>C	p.Asp24Asp	72/1575	72/1575	24/524	,C	downstream_gene_variant	MODIFIER	BOH78_2571	BOH78_2571	transcript	ONH74340	protein_coding	c.*360T>C	360
BOH78_Sc010	356252	T	C	synonymous_variant	LOW	L	SLC1, SWS2	BOH78_2572, BOH78_2573	BOH78_2572	transcript	ONH74337	protein_coding	2023-02-01	c.484T>C	p.Leu162Leu	484/1575	484/1575	162/524
BOH78_Sc010	356449	C	T	synonymous_variant	LOW	L	SLC1, SWS2	BOH78_2572, BOH78_2573	BOH78_2572	transcript	ONH74337	protein_coding	2023-02-01	c.681C>T	p.Phe227Phe	681/1575	681/1575	227/524
BOH78_Sc010	356368	A	C	synonymous_variant	LOW	L	SLC1, SWS2	BOH78_2572, BOH78_2573	BOH78_2572	transcript	ONH74337	protein_coding	2023-02-01	c.600A>C	p.Leu200Leu	600/1575	600/1575	200/524
BOH78_Sc010	357821	G	A	synonymous_variant	LOW	L	SLC1, SWS2	BOH78_2572, BOH78_2573	BOH78_2572	transcript	ONH74337	protein_coding	2023-02-02	c.1551G>A	p.Leu517Leu	1551/1575	1551/1575	517/524	,A	upstream_gene_variant	MODIFIER	BOH78_2573	BOH78_2573	transcript	ONH74338	protein_coding	c.-489G>A	489
BOH78_Sc010	358567	T	C	synonymous_variant	LOW	L	SLC1, SWS2	BOH78_2572, BOH78_2573	BOH78_2573	transcript	ONH74338	protein_coding	2023-01-01	c.258T>C	p.His86His	258/888	258/888	86/295
BOH78_Sc010	358924	G	T	synonymous_variant	LOW	L	SLC1, SWS2	BOH78_2572, BOH78_2573	BOH78_2573	transcript	ONH74338	protein_coding	2023-01-01	c.615G>T	p.Ser205Ser	615/888	615/888	205/295
BOH78_Sc010	358855	C	T	synonymous_variant	LOW	L	SLC1, SWS2	BOH78_2572, BOH78_2573	BOH78_2573	transcript	ONH74338	protein_coding	2023-01-01	c.546C>T	p.Ala182Ala	546/888	546/888	182/295
BOH78_Sc011	84079	T	C	synonymous_variant	LOW	L	TGL2	BOH78_2616	BOH78_2616	transcript	ONH74100	protein_coding	2023-01-01	c.132T>C	p.Val44Val	132/969	132/969	44/322
BOH78_Sc011	84691	T	C	synonymous_variant	LOW	L	TGL2	BOH78_2616	BOH78_2616	transcript	ONH74100	protein_coding	2023-01-01	c.744T>C	p.Thr248Thr	744/969	744/969	248/322	,C	downstream_gene_variant	MODIFIER	BOH78_2617	BOH78_2617	transcript	ONH74099	protein_coding	c.*343A>G	343
BOH78_Sc011	84358	A	G	synonymous_variant	LOW	L	TGL2	BOH78_2616	BOH78_2616	transcript	ONH74100	protein_coding	2023-01-01	c.411A>G	p.Glu137Glu	411/969	411/969	137/322
BOH78_Sc012	76905	C	A	synonymous_variant	LOW	L	YPK1, YPK2	BOH78_2763	BOH78_2763	transcript	ONH73920	protein_coding	2023-02-01	c.609C>A	p.Val203Val	609/819	609/819	203/272
BOH78_Sc012	153109	G	A	synonymous_variant	LOW	L	POX1	BOH78_2802	BOH78_2802	transcript	ONH73865	protein_coding	2023-01-01	c.1131C>T	p.Leu377Leu	1131/2106	1131/2106	377/701
BOH78_Sc012	153610	T	A	synonymous_variant	LOW	L	POX1	BOH78_2802	BOH78_2802	transcript	ONH73865	protein_coding	2023-01-01	c.630A>T	p.Ala210Ala	630/2106	630/2106	210/701
BOH78_Sc012	152392	C	T	synonymous_variant	LOW	L	POX1	BOH78_2802	BOH78_2802	transcript	ONH73865	protein_coding	2023-01-01	c.1848G>A	p.Lys616Lys	1848/2106	1848/2106	616/701
BOH78_Sc012	153037	G	C	synonymous_variant	LOW	L	POX1	BOH78_2802	BOH78_2802	transcript	ONH73865	protein_coding	2023-01-01	c.1203C>G	p.Ala401Ala	1203/2106	1203/2106	401/701
BOH78_Sc013	124272	A	G	synonymous_variant	LOW	L	LCB1	BOH78_2930	BOH78_2930	transcript	ONH73714	protein_coding	2023-01-01	c.1080A>G	p.Lys360Lys	1080/1677	1080/1677	360/558
BOH78_Sc013	124425	A	G	synonymous_variant	LOW	L	LCB1	BOH78_2930	BOH78_2930	transcript	ONH73714	protein_coding	2023-01-01	c.1233A>G	p.Arg411Arg	1233/1677	1233/1677	411/558
BOH78_Sc013	123459	A	G	synonymous_variant	LOW	L	LCB1	BOH78_2930	BOH78_2930	transcript	ONH73714	protein_coding	2023-01-01	c.267A>G	p.Lys89Lys	267/1677	267/1677	89/558
BOH78_Sc016	66010	G	A	synonymous_variant	LOW	L	SCT1	BOH78_3328	BOH78_3328	transcript	ONH73163	protein_coding	2023-01-01	c.1632C>T	p.Phe544Phe	1632/2172	1632/2172	544/723
BOH78_Sc016	65716	C	T	synonymous_variant	LOW	L	SCT1	BOH78_3328	BOH78_3328	transcript	ONH73163	protein_coding	2023-01-01	c.1926G>A	p.Lys642Lys	1926/2172	1926/2172	642/723	,T	downstream_gene_variant	MODIFIER	BOH78_3327	BOH78_3327	transcript	ONH73162	protein_coding	c.*351C>T	351
BOH78_Sc016	189191	T	A	synonymous_variant	LOW	L	POT1	BOH78_3388	BOH78_3388	transcript	ONH73084	protein_coding	2023-01-01	c.849T>A	p.Ala283Ala	849/1260	849/1260	283/419
BOH78_Sc016	188717	T	C	synonymous_variant	LOW	L	POT1	BOH78_3388	BOH78_3388	transcript	ONH73084	protein_coding	2023-01-01	c.375T>C	p.Ile125Ile	375/1260	375/1260	125/419
BOH78_Sc016	189113	T	C	synonymous_variant	LOW	L	POT1	BOH78_3388	BOH78_3388	transcript	ONH73084	protein_coding	2023-01-01	c.771T>C	p.Leu257Leu	771/1260	771/1260	257/419
BOH78_Sc016	189161	C	G	synonymous_variant	LOW	L	POT1	BOH78_3388	BOH78_3388	transcript	ONH73084	protein_coding	2023-01-01	c.819C>G	p.Gly273Gly	819/1260	819/1260	273/419
BOH78_Sc016	188504	C	T	synonymous_variant	LOW	L	POT1	BOH78_3388	BOH78_3388	transcript	ONH73084	protein_coding	2023-01-01	c.162C>T	p.Tyr54Tyr	162/1260	162/1260	54/419
BOH78_Sc016	188570	C	T	synonymous_variant	LOW	L	POT1	BOH78_3388	BOH78_3388	transcript	ONH73084	protein_coding	2023-01-01	c.228C>T	p.Val76Val	228/1260	228/1260	76/419
BOH78_Sc017	122743	T	G	synonymous_variant	LOW	L	AYR1	BOH78_3464	BOH78_3464	transcript	ONH72945	protein_coding	2023-01-01	c.396A>C	p.Thr132Thr	396/867	396/867	132/288
BOH78_Sc025	67207	G	A	synonymous_variant	LOW	L	YEH1, YEH2	BOH78_4105	BOH78_4105	transcript	ONH72026	protein_coding	2023-01-01	c.705C>T	p.Asn235Asn	705/849	705/849	235/282	,A	downstream_gene_variant	MODIFIER	BOH78_4104	BOH78_4104	transcript	ONH72027	protein_coding	c.*417G>A	417
BOH78_Sc025	67696	G	A	synonymous_variant	LOW	L	YEH1, YEH2	BOH78_4105	BOH78_4105	transcript	ONH72026	protein_coding	2023-01-01	c.216C>T	p.Gly72Gly	216/849	216/849	72/282
BOH78_Sc029	70598	C	T	synonymous_variant	LOW	L	DGA1	BOH78_4317	BOH78_4317	transcript	ONH71739	protein_coding	2023-02-01	c.676C>T	p.Leu226Leu	676/2715	676/2715	226/904
BOH78_Sc029	71796	C	A	synonymous_variant	LOW	L	DGA1	BOH78_4317	BOH78_4317	transcript	ONH71739	protein_coding	2023-02-02	c.1641C>A	p.Pro547Pro	1641/2715	1641/2715	547/904
BOH78_Sc038	40660	A	G	synonymous_variant	LOW	L	FAT1	BOH78_4620	BOH78_4620	transcript	ONH71276	protein_coding	2023-01-01	c.1071A>G	p.Ser357Ser	1071/2115	1071/2115	357/704
BOH78_Sc038	39821	C	T	synonymous_variant	LOW	L	FAT1	BOH78_4620	BOH78_4620	transcript	ONH71276	protein_coding	2023-01-01	c.232C>T	p.Leu78Leu	232/2115	232/2115	78/704
BOH78_Sc038	41686	C	T	synonymous_variant	LOW	L	FAT1	BOH78_4620	BOH78_4620	transcript	ONH71276	protein_coding	2023-01-01	c.2097C>T	p.Asn699Asn	2097/2115	2097/2115	699/704	,T	upstream_gene_variant	MODIFIER	BOH78_4621	BOH78_4621	transcript	ONH71277	protein_coding	c.-347C>T	347
BOH78_Sc048	25183	G	A	synonymous_variant	LOW	L	ARE1, ARE5	BOH78_4883	BOH78_4880	transcript	ONH70915	protein_coding	2023-02-01	c.45G>A	p.Ser15Ser	45/1038	45/1038	15/345	,A	upstream_gene_variant	MODIFIER	BOH78_4879	BOH78_4879	transcript	ONH70909	protein_coding	c.-431C>T	431
BOH78_Sc048	25147	C	T	synonymous_variant	LOW	L	ARE1, ARE6	BOH78_4884	BOH78_4880	transcript	ONH70915	protein_coding	2023-02-01	c.9C>T	p.Asp3Asp	9/1038	9/1038	3/345	,T	upstream_gene_variant	MODIFIER	BOH78_4879	BOH78_4879	transcript	ONH70909	protein_coding	c.-395G>A	395
BOH78_Sc048	25222	G	A	synonymous_variant	LOW	L	ARE1, ARE7	BOH78_4885	BOH78_4880	transcript	ONH70915	protein_coding	2023-02-01	c.84G>A	p.Arg28Arg	84/1038	84/1038	28/345	,A	upstream_gene_variant	MODIFIER	BOH78_4879	BOH78_4879	transcript	ONH70909	protein_coding	c.-470C>T	470
BOH78_Sc048	25249	C	T	synonymous_variant	LOW	L	ARE1, ARE8	BOH78_4886	BOH78_4880	transcript	ONH70915	protein_coding	2023-02-01	c.111C>T	p.Asp37Asp	111/1038	111/1038	37/345	,T	upstream_gene_variant	MODIFIER	BOH78_4879	BOH78_4879	transcript	ONH70909	protein_coding	c.-497G>A	497
BOH78_Sc001	335032	A	C	upstream_gene_variant	MODIFIER	L	LCB2	BOH78_0164	BOH78_0164	transcript	ONH77659	protein_coding	c.-295T>G	295	,C	upstream_gene_variant	MODIFIER	BOH78_0165	BOH78_0165	transcript	ONH77658	protein_coding	c.-405A>C	405	,C	intergenic_region	MODIFIER	BOH78_0164-BOH78_0165	BOH78_0164-BOH78_0165	intergenic_region	BOH78_0164-BOH78_0165	n.335032A>C
BOH78_Sc001	335049	A	T	upstream_gene_variant	MODIFIER	L	LCB2	BOH78_0164	BOH78_0164	transcript	ONH77659	protein_coding	c.-312T>A	312	,T	upstream_gene_variant	MODIFIER	BOH78_0165	BOH78_0165	transcript	ONH77658	protein_coding	c.-388A>T	388	,T	intergenic_region	MODIFIER	BOH78_0164-BOH78_0165	BOH78_0164-BOH78_0165	intergenic_region	BOH78_0164-BOH78_0165	n.335049A>T
BOH78_Sc001	344778	T	C	upstream_gene_variant	MODIFIER	L	GPD1, GPD2	BOH78_0171	BOH78_0171	transcript	ONH77843	protein_coding	c.-472T>C	472	,C	intergenic_region	MODIFIER	BOH78_0170-BOH78_0171	BOH78_0170-BOH78_0171	intergenic_region	BOH78_0170-BOH78_0171	n.344778T>C
BOH78_Sc001	345150	T	G	upstream_gene_variant	MODIFIER	L	GPD1, GPD2	BOH78_0171	BOH78_0171	transcript	ONH77843	protein_coding	c.-100T>G	100	,G	intergenic_region	MODIFIER	BOH78_0170-BOH78_0171	BOH78_0170-BOH78_0171	intergenic_region	BOH78_0170-BOH78_0171	n.345150T>G
BOH78_Sc001	345231	G	A	upstream_gene_variant	MODIFIER	L	GPD1, GPD2	BOH78_0171	BOH78_0171	transcript	ONH77843	protein_coding	c.-19G>A	19	,A	intergenic_region	MODIFIER	BOH78_0170-BOH78_0171	BOH78_0170-BOH78_0171	intergenic_region	BOH78_0170-BOH78_0171	n.345231G>A
BOH78_Sc001	345225	G	A	upstream_gene_variant	MODIFIER	L	GPD1, GPD2	BOH78_0171	BOH78_0171	transcript	ONH77843	protein_coding	c.-25G>A	25	,A	intergenic_region	MODIFIER	BOH78_0170-BOH78_0171	BOH78_0170-BOH78_0171	intergenic_region	BOH78_0170-BOH78_0171	n.345225G>A
BOH78_Sc001	344942	G	A	upstream_gene_variant	MODIFIER	L	GPD1, GPD2	BOH78_0171	BOH78_0171	transcript	ONH77843	protein_coding	c.-308G>A	308	,A	intergenic_region	MODIFIER	BOH78_0170-BOH78_0171	BOH78_0170-BOH78_0171	intergenic_region	BOH78_0170-BOH78_0171	n.344942G>A
BOH78_Sc002	141709	A	T	upstream_gene_variant	MODIFIER	L	ERG10	BOH78_0422	BOH78_0422	transcript	ONH77180	protein_coding	c.-85A>T	85	,T	downstream_gene_variant	MODIFIER	BOH78_0421	BOH78_0421	transcript	ONH77183	protein_coding	c.*330A>T	330	WARNING_TRANSCRIPT_NO_STOP_CODON,T	intergenic_region	MODIFIER	BOH78_0421-BOH78_0422	BOH78_0421-BOH78_0422	intergenic_region	BOH78_0421-BOH78_0422	n.141709A>T
BOH78_Sc002	218049	G	A	upstream_gene_variant	MODIFIER	L	ELO1, ELO2, ELO3	BOH78_0456, BOH78_1875	BOH78_0456	transcript	ONH77331	protein_coding	c.-74G>A	74	,A	intergenic_region	MODIFIER	BOH78_0455-BOH78_0456	BOH78_0455-BOH78_0456	intergenic_region	BOH78_0455-BOH78_0456	n.218049G>A
BOH78_Sc007	97940	G	A	upstream_gene_variant	MODIFIER	L	ELO1, ELO2, ELO3	BOH78_0456, BOH78_1875	BOH78_1875	transcript	ONH75160	protein_coding	c.-2C>T	2	,A	intergenic_region	MODIFIER	BOH78_1875-BOH78_1876	BOH78_1875-BOH78_1876	intergenic_region	BOH78_1875-BOH78_1876	n.97940G>A
BOH78_Sc002	594211	C	A	upstream_gene_variant	MODIFIER	L	TGL4, TGL5,	BOH78_0638	BOH78_0638	transcript	ONH77074	protein_coding	c.-78G>T	78	,A	intron_variant	MODIFIER	BOH78_0639	BOH78_0639	transcript	ONH77073	protein_coding	2023-01-01	c.1757-16G>T
BOH78_Sc002	594260	G	A	upstream_gene_variant	MODIFIER	L	TGL4, TGL5,	BOH78_0638	BOH78_0638	transcript	ONH77074	protein_coding	c.-127C>T	127	,A	intron_variant	MODIFIER	BOH78_0639	BOH78_0639	transcript	ONH77073	protein_coding	2023-01-01	c.1757-65C>T
BOH78_Sc003	24131	C	A	upstream_gene_variant	MODIFIER	L	TGL3	BOH78_0712	BOH78_0712	transcript	ONH76835	protein_coding	c.-485G>T	485	,A	upstream_gene_variant	MODIFIER	BOH78_0713	BOH78_0713	transcript	ONH76836	protein_coding	c.-304C>A	304	,A	intergenic_region	MODIFIER	BOH78_0712-BOH78_0713	BOH78_0712-BOH78_0713	intergenic_region	BOH78_0712-BOH78_0713	n.24131C>A
BOH78_Sc003	24003	A	G	upstream_gene_variant	MODIFIER	L	TGL3	BOH78_0712	BOH78_0712	transcript	ONH76835	protein_coding	c.-357T>C	357	,G	upstream_gene_variant	MODIFIER	BOH78_0713	BOH78_0713	transcript	ONH76836	protein_coding	c.-432A>G	432	,G	intergenic_region	MODIFIER	BOH78_0712-BOH78_0713	BOH78_0712-BOH78_0713	intergenic_region	BOH78_0712-BOH78_0713	n.24003A>G
BOH78_Sc004	104496	A	G	upstream_gene_variant	MODIFIER	L	ACC1, HFA1	BOH78_1078	BOH78_1078	transcript	ONH76354	protein_coding	c.-204A>G	204	,G	intergenic_region	MODIFIER	BOH78_1077-BOH78_1078	BOH78_1077-BOH78_1078	intergenic_region	BOH78_1077-BOH78_1078	n.104496A>G
BOH78_Sc004	104563	C	A	upstream_gene_variant	MODIFIER	L	ACC1, HFA1	BOH78_1078	BOH78_1078	transcript	ONH76354	protein_coding	c.-137C>A	137	,A	intergenic_region	MODIFIER	BOH78_1077-BOH78_1078	BOH78_1077-BOH78_1078	intergenic_region	BOH78_1077-BOH78_1078	n.104563C>A
BOH78_Sc004	104352	G	A	upstream_gene_variant	MODIFIER	L	ACC1, HFA1	BOH78_1078	BOH78_1078	transcript	ONH76354	protein_coding	c.-348G>A	348	,A	intergenic_region	MODIFIER	BOH78_1077-BOH78_1078	BOH78_1077-BOH78_1078	intergenic_region	BOH78_1077-BOH78_1078	n.104352G>A
BOH78_Sc004	104410	A	G	upstream_gene_variant	MODIFIER	L	ACC1, HFA1	BOH78_1078	BOH78_1078	transcript	ONH76354	protein_coding	c.-290A>G	290	,G	intergenic_region	MODIFIER	BOH78_1077-BOH78_1078	BOH78_1077-BOH78_1078	intergenic_region	BOH78_1077-BOH78_1078	n.104410A>G
BOH78_Sc004	104393	C	T	upstream_gene_variant	MODIFIER	L	ACC1, HFA1	BOH78_1078	BOH78_1078	transcript	ONH76354	protein_coding	c.-307C>T	307	,T	intergenic_region	MODIFIER	BOH78_1077-BOH78_1078	BOH78_1077-BOH78_1078	intergenic_region	BOH78_1077-BOH78_1078	n.104393C>T
BOH78_Sc004	104572	C	T	upstream_gene_variant	MODIFIER	L	ACC1, HFA1	BOH78_1078	BOH78_1078	transcript	ONH76354	protein_coding	c.-128C>T	128	,T	intergenic_region	MODIFIER	BOH78_1077-BOH78_1078	BOH78_1077-BOH78_1078	intergenic_region	BOH78_1077-BOH78_1078	n.104572C>T
BOH78_Sc004	104573	C	T	upstream_gene_variant	MODIFIER	L	ACC1, HFA1	BOH78_1078	BOH78_1078	transcript	ONH76354	protein_coding	c.-127C>T	127	,T	intergenic_region	MODIFIER	BOH78_1077-BOH78_1078	BOH78_1077-BOH78_1078	intergenic_region	BOH78_1077-BOH78_1078	n.104573C>T
BOH78_Sc004	104259	C	T	upstream_gene_variant	MODIFIER	L	ACC1, HFA1	BOH78_1078	BOH78_1078	transcript	ONH76354	protein_coding	c.-441C>T	441	,T	intergenic_region	MODIFIER	BOH78_1077-BOH78_1078	BOH78_1077-BOH78_1078	intergenic_region	BOH78_1077-BOH78_1078	n.104259C>T
BOH78_Sc004	104241	C	T	upstream_gene_variant	MODIFIER	L	ACC1, HFA1	BOH78_1078	BOH78_1078	transcript	ONH76354	protein_coding	c.-459C>T	459	,T	intergenic_region	MODIFIER	BOH78_1077-BOH78_1078	BOH78_1077-BOH78_1078	intergenic_region	BOH78_1077-BOH78_1078	n.104241C>T
BOH78_Sc004	404766	T	C	upstream_gene_variant	MODIFIER	L	YDC1, YPC1	BOH78_1210	BOH78_1210	transcript	ONH76270	protein_coding	c.-145T>C	145	,C	downstream_gene_variant	MODIFIER	BOH78_1209	BOH78_1209	transcript	ONH76429	protein_coding	c.*466T>C	466	,C	intergenic_region	MODIFIER	BOH78_1209-BOH78_1210	BOH78_1209-BOH78_1210	intergenic_region	BOH78_1209-BOH78_1210	n.404766T>C
BOH78_Sc004	404440	C	T	upstream_gene_variant	MODIFIER	L	YDC1, YPC1	BOH78_1210	BOH78_1210	transcript	ONH76270	protein_coding	c.-471C>T	471	,T	downstream_gene_variant	MODIFIER	BOH78_1209	BOH78_1209	transcript	ONH76429	protein_coding	c.*140C>T	140	,T	intergenic_region	MODIFIER	BOH78_1209-BOH78_1210	BOH78_1209-BOH78_1210	intergenic_region	BOH78_1209-BOH78_1210	n.404440C>T
BOH78_Sc004	556898	G	A,T	upstream_gene_variant	MODIFIER	L	ERG13	BOH78_1273	BOH78_1273	transcript	ONH76246	protein_coding	c.-414G>A	414	,T	upstream_gene_variant	MODIFIER	BOH78_1273	BOH78_1273	transcript	ONH76246	protein_coding	c.-414G>T	414	,A	intergenic_region	MODIFIER	BOH78_1272-BOH78_1273	BOH78_1272-BOH78_1273	intergenic_region	BOH78_1272-BOH78_1273	n.556898G>A	,T	intergenic_region	MODIFIER	BOH78_1272-BOH78_1273	BOH78_1272-BOH78_1273	intergenic_region	BOH78_1272-BOH78_1273	n.556898G>T
BOH78_Sc004	557196	T	C	upstream_gene_variant	MODIFIER	L	ERG13	BOH78_1273	BOH78_1273	transcript	ONH76246	protein_coding	c.-116T>C	116	,C	intergenic_region	MODIFIER	BOH78_1272-BOH78_1273	BOH78_1272-BOH78_1273	intergenic_region	BOH78_1272-BOH78_1273	n.557196T>C
BOH78_Sc004	557177	G	A	upstream_gene_variant	MODIFIER	L	ERG13	BOH78_1273	BOH78_1273	transcript	ONH76246	protein_coding	c.-135G>A	135	,A	intergenic_region	MODIFIER	BOH78_1272-BOH78_1273	BOH78_1272-BOH78_1273	intergenic_region	BOH78_1272-BOH78_1273	n.557177G>A
BOH78_Sc004	556845	T	C	upstream_gene_variant	MODIFIER	L	ERG13	BOH78_1273	BOH78_1273	transcript	ONH76246	protein_coding	c.-467T>C	467	,C	intergenic_region	MODIFIER	BOH78_1272-BOH78_1273	BOH78_1272-BOH78_1273	intergenic_region	BOH78_1272-BOH78_1273	n.556845T>C
BOH78_Sc004	556924	A	T	upstream_gene_variant	MODIFIER	L	ERG13	BOH78_1273	BOH78_1273	transcript	ONH76246	protein_coding	c.-388A>T	388	,T	intergenic_region	MODIFIER	BOH78_1272-BOH78_1273	BOH78_1272-BOH78_1273	intergenic_region	BOH78_1272-BOH78_1273	n.556924A>T
BOH78_Sc004	557137	T	C	upstream_gene_variant	MODIFIER	L	ERG13	BOH78_1273	BOH78_1273	transcript	ONH76246	protein_coding	c.-175T>C	175	,C	intergenic_region	MODIFIER	BOH78_1272-BOH78_1273	BOH78_1272-BOH78_1273	intergenic_region	BOH78_1272-BOH78_1273	n.557137T>C
BOH78_Sc004	557154	T	C	upstream_gene_variant	MODIFIER	L	ERG13	BOH78_1273	BOH78_1273	transcript	ONH76246	protein_coding	c.-158T>C	158	,C	intergenic_region	MODIFIER	BOH78_1272-BOH78_1273	BOH78_1272-BOH78_1273	intergenic_region	BOH78_1272-BOH78_1273	n.557154T>C
BOH78_Sc004	556817	G	A	upstream_gene_variant	MODIFIER	L	ERG13	BOH78_1273	BOH78_1273	transcript	ONH76246	protein_coding	c.-495G>A	495	,A	intergenic_region	MODIFIER	BOH78_1272-BOH78_1273	BOH78_1272-BOH78_1273	intergenic_region	BOH78_1272-BOH78_1273	n.556817G>A
BOH78_Sc004	557028	C	T	upstream_gene_variant	MODIFIER	L	ERG13	BOH78_1273	BOH78_1273	transcript	ONH76246	protein_coding	c.-284C>T	284	,T	intergenic_region	MODIFIER	BOH78_1272-BOH78_1273	BOH78_1272-BOH78_1273	intergenic_region	BOH78_1272-BOH78_1273	n.557028C>T
BOH78_Sc004	556940	A	T	upstream_gene_variant	MODIFIER	L	ERG13	BOH78_1273	BOH78_1273	transcript	ONH76246	protein_coding	c.-372A>T	372	,T	intergenic_region	MODIFIER	BOH78_1272-BOH78_1273	BOH78_1272-BOH78_1273	intergenic_region	BOH78_1272-BOH78_1273	n.556940A>T
BOH78_Sc005	7759	T	A	upstream_gene_variant	MODIFIER	L	MFE1(FOX2)	BOH78_1320	BOH78_1320	transcript	ONH75833	protein_coding	c.-326T>A	326	,A	intergenic_region	MODIFIER	BOH78_1319-BOH78_1320	BOH78_1319-BOH78_1320	intergenic_region	BOH78_1319-BOH78_1320	n.7759T>A
BOH78_Sc005	7985	A	C	upstream_gene_variant	MODIFIER	L	MFE1(FOX2)	BOH78_1320	BOH78_1320	transcript	ONH75833	protein_coding	c.-100A>C	100	,C	intergenic_region	MODIFIER	BOH78_1319-BOH78_1320	BOH78_1319-BOH78_1320	intergenic_region	BOH78_1319-BOH78_1320	n.7985A>C
BOH78_Sc005	7757	T	A	upstream_gene_variant	MODIFIER	L	MFE1(FOX2)	BOH78_1320	BOH78_1320	transcript	ONH75833	protein_coding	c.-328T>A	328	,A	intergenic_region	MODIFIER	BOH78_1319-BOH78_1320	BOH78_1319-BOH78_1320	intergenic_region	BOH78_1319-BOH78_1320	n.7757T>A
BOH78_Sc005	8016	T	A	upstream_gene_variant	MODIFIER	L	MFE1(FOX2)	BOH78_1320	BOH78_1320	transcript	ONH75833	protein_coding	c.-69T>A	69	,A	intergenic_region	MODIFIER	BOH78_1319-BOH78_1320	BOH78_1319-BOH78_1320	intergenic_region	BOH78_1319-BOH78_1320	n.8016T>A
BOH78_Sc010	126586	C	T	upstream_gene_variant	MODIFIER	L	FAS1	BOH78_2482	BOH78_2482	transcript	ONH74293	protein_coding	c.-472C>T	472	,T	intergenic_region	MODIFIER	BOH78_2481-BOH78_2482	BOH78_2481-BOH78_2482	intergenic_region	BOH78_2481-BOH78_2482	n.126586C>T
BOH78_Sc010	126932	A	T	upstream_gene_variant	MODIFIER	L	FAS1	BOH78_2482	BOH78_2482	transcript	ONH74293	protein_coding	c.-126A>T	126	,T	intergenic_region	MODIFIER	BOH78_2481-BOH78_2482	BOH78_2481-BOH78_2482	intergenic_region	BOH78_2481-BOH78_2482	n.126932A>T
BOH78_Sc010	355519	T	C	upstream_gene_variant	MODIFIER	L	SLC1, SWS2	BOH78_2572, BOH78_2573	BOH78_2572	transcript	ONH74337	protein_coding	c.-250T>C	250	,C	downstream_gene_variant	MODIFIER	BOH78_2571	BOH78_2571	transcript	ONH74340	protein_coding	c.*39T>C	39	,C	intergenic_region	MODIFIER	BOH78_2571-BOH78_2572	BOH78_2571-BOH78_2572	intergenic_region	BOH78_2571-BOH78_2572	n.355519T>C
BOH78_Sc010	358292	A	G	upstream_gene_variant	MODIFIER	L	SLC1, SWS2	BOH78_2572, BOH78_2573	BOH78_2573	transcript	ONH74338	protein_coding	c.-18A>G	18	,G	downstream_gene_variant	MODIFIER	BOH78_2572	BOH78_2572	transcript	ONH74337	protein_coding	c.*447A>G	447	,G	intergenic_region	MODIFIER	BOH78_2572-BOH78_2573	BOH78_2572-BOH78_2573	intergenic_region	BOH78_2572-BOH78_2573	n.358292A>G
BOH78_Sc010	358116	A	G	upstream_gene_variant	MODIFIER	L	SLC1, SWS2	BOH78_2572, BOH78_2573	BOH78_2573	transcript	ONH74338	protein_coding	c.-194A>G	194	,G	downstream_gene_variant	MODIFIER	BOH78_2572	BOH78_2572	transcript	ONH74337	protein_coding	c.*271A>G	271	,G	intergenic_region	MODIFIER	BOH78_2572-BOH78_2573	BOH78_2572-BOH78_2573	intergenic_region	BOH78_2572-BOH78_2573	n.358116A>G
BOH78_Sc011	83904	T	A	upstream_gene_variant	MODIFIER	L	TGL2	BOH78_2616	BOH78_2616	transcript	ONH74100	protein_coding	c.-44T>A	44	,A	intergenic_region	MODIFIER	BOH78_2615-BOH78_2616	BOH78_2615-BOH78_2616	intergenic_region	BOH78_2615-BOH78_2616	n.83904T>A
BOH78_Sc012	76150	A	T	upstream_gene_variant	MODIFIER	L	YPK1, YPK2	BOH78_2763	BOH78_2763	transcript	ONH73920	protein_coding	c.-147A>T	147	,T	downstream_gene_variant	MODIFIER	BOH78_2762	BOH78_2762	transcript	ONH73921	protein_coding	c.*241A>T	241	,T	intergenic_region	MODIFIER	BOH78_2762-BOH78_2763	BOH78_2762-BOH78_2763	intergenic_region	BOH78_2762-BOH78_2763	n.76150A>T
BOH78_Sc012	76259	T	C	upstream_gene_variant	MODIFIER	L	YPK1, YPK2	BOH78_2763	BOH78_2763	transcript	ONH73920	protein_coding	c.-38T>C	38	,C	downstream_gene_variant	MODIFIER	BOH78_2762	BOH78_2762	transcript	ONH73921	protein_coding	c.*350T>C	350	,C	intergenic_region	MODIFIER	BOH78_2762-BOH78_2763	BOH78_2762-BOH78_2763	intergenic_region	BOH78_2762-BOH78_2763	n.76259T>C
BOH78_Sc012	76261	C	T	upstream_gene_variant	MODIFIER	L	YPK1, YPK2	BOH78_2763	BOH78_2763	transcript	ONH73920	protein_coding	c.-36C>T	36	,T	downstream_gene_variant	MODIFIER	BOH78_2762	BOH78_2762	transcript	ONH73921	protein_coding	c.*352C>T	352	,T	intergenic_region	MODIFIER	BOH78_2762-BOH78_2763	BOH78_2762-BOH78_2763	intergenic_region	BOH78_2762-BOH78_2763	n.76261C>T
BOH78_Sc012	76242	G	C	upstream_gene_variant	MODIFIER	L	YPK1, YPK2	BOH78_2763	BOH78_2763	transcript	ONH73920	protein_coding	c.-55G>C	55	,C	downstream_gene_variant	MODIFIER	BOH78_2762	BOH78_2762	transcript	ONH73921	protein_coding	c.*333G>C	333	,C	intergenic_region	MODIFIER	BOH78_2762-BOH78_2763	BOH78_2762-BOH78_2763	intergenic_region	BOH78_2762-BOH78_2763	n.76242G>C
BOH78_Sc012	154398	G	C	upstream_gene_variant	MODIFIER	L	POX1	BOH78_2802	BOH78_2802	transcript	ONH73865	protein_coding	c.-159C>G	159	,C	upstream_gene_variant	MODIFIER	BOH78_2803	BOH78_2803	transcript	ONH73866	protein_coding	c.-474G>C	474	,C	intergenic_region	MODIFIER	BOH78_2802-BOH78_2803	BOH78_2802-BOH78_2803	intergenic_region	BOH78_2802-BOH78_2803	n.154398G>C
BOH78_Sc012	154703	C	A	upstream_gene_variant	MODIFIER	L	POX1	BOH78_2802	BOH78_2802	transcript	ONH73865	protein_coding	c.-464G>T	464	,A	upstream_gene_variant	MODIFIER	BOH78_2803	BOH78_2803	transcript	ONH73866	protein_coding	c.-169C>A	169	,A	intergenic_region	MODIFIER	BOH78_2802-BOH78_2803	BOH78_2802-BOH78_2803	intergenic_region	BOH78_2802-BOH78_2803	n.154703C>A
BOH78_Sc012	154698	C	T	upstream_gene_variant	MODIFIER	L	POX1	BOH78_2802	BOH78_2802	transcript	ONH73865	protein_coding	c.-459G>A	459	,T	upstream_gene_variant	MODIFIER	BOH78_2803	BOH78_2803	transcript	ONH73866	protein_coding	c.-174C>T	174	,T	intergenic_region	MODIFIER	BOH78_2802-BOH78_2803	BOH78_2802-BOH78_2803	intergenic_region	BOH78_2802-BOH78_2803	n.154698C>T
BOH78_Sc012	154567	A	C	upstream_gene_variant	MODIFIER	L	POX1	BOH78_2802	BOH78_2802	transcript	ONH73865	protein_coding	c.-328T>G	328	,C	upstream_gene_variant	MODIFIER	BOH78_2803	BOH78_2803	transcript	ONH73866	protein_coding	c.-305A>C	305	,C	intergenic_region	MODIFIER	BOH78_2802-BOH78_2803	BOH78_2802-BOH78_2803	intergenic_region	BOH78_2802-BOH78_2803	n.154567A>C
BOH78_Sc013	122796	C	A	upstream_gene_variant	MODIFIER	L	LCB1	BOH78_2930	BOH78_2930	transcript	ONH73714	protein_coding	c.-397C>A	397	,A	downstream_gene_variant	MODIFIER	BOH78_2929	BOH78_2929	transcript	ONH73646	protein_coding	c.*383C>A	383	,A	intergenic_region	MODIFIER	BOH78_2929-BOH78_2930	BOH78_2929-BOH78_2930	intergenic_region	BOH78_2929-BOH78_2930	n.122796C>A
BOH78_Sc013	122956	T	C	upstream_gene_variant	MODIFIER	L	LCB1	BOH78_2930	BOH78_2930	transcript	ONH73714	protein_coding	c.-237T>C	237	,C	intergenic_region	MODIFIER	BOH78_2929-BOH78_2930	BOH78_2929-BOH78_2930	intergenic_region	BOH78_2929-BOH78_2930	n.122956T>C
BOH78_Sc016	67675	C	A	upstream_gene_variant	MODIFIER	L	SCT1	BOH78_3328	BOH78_3328	transcript	ONH73163	protein_coding	c.-34G>T	34	,A	upstream_gene_variant	MODIFIER	BOH78_3329	BOH78_3329	transcript	ONH73164	protein_coding	c.-228C>A	228	,A	intergenic_region	MODIFIER	BOH78_3328-BOH78_3329	BOH78_3328-BOH78_3329	intergenic_region	BOH78_3328-BOH78_3329	n.67675C>A
BOH78_Sc016	67891	A	T	upstream_gene_variant	MODIFIER	L	SCT1	BOH78_3328	BOH78_3328	transcript	ONH73163	protein_coding	c.-250T>A	250	,T	upstream_gene_variant	MODIFIER	BOH78_3329	BOH78_3329	transcript	ONH73164	protein_coding	c.-12A>T	12	,T	intergenic_region	MODIFIER	BOH78_3328-BOH78_3329	BOH78_3328-BOH78_3329	intergenic_region	BOH78_3328-BOH78_3329	n.67891A>T
BOH78_Sc017	123408	C	T	upstream_gene_variant	MODIFIER	L	AYR1	BOH78_3464	BOH78_3464	transcript	ONH72945	protein_coding	c.-270G>A	270	,T	intergenic_region	MODIFIER	BOH78_3464-BOH78_3465	BOH78_3464-BOH78_3465	intergenic_region	BOH78_3464-BOH78_3465	n.123408C>T
BOH78_Sc025	68261	A	G	upstream_gene_variant	MODIFIER	L	YEH1, YEH2	BOH78_4105	BOH78_4105	transcript	ONH72026	protein_coding	c.-350T>C	350	,G	intergenic_region	MODIFIER	BOH78_4105-BOH78_4106	BOH78_4105-BOH78_4106	intergenic_region	BOH78_4105-BOH78_4106	n.68261A>G
BOH78_Sc025	68326	T	C	upstream_gene_variant	MODIFIER	L	YEH1, YEH2	BOH78_4105	BOH78_4105	transcript	ONH72026	protein_coding	c.-415A>G	415	,C	intergenic_region	MODIFIER	BOH78_4105-BOH78_4106	BOH78_4105-BOH78_4106	intergenic_region	BOH78_4105-BOH78_4106	n.68326T>C
BOH78_Sc029	69441	T	A	upstream_gene_variant	MODIFIER	L	DGA1	BOH78_4317	BOH78_4317	transcript	ONH71739	protein_coding	c.-482T>A	482	,A	downstream_gene_variant	MODIFIER	BOH78_4316	BOH78_4316	transcript	ONH71738	protein_coding	c.*31T>A	31	,A	intergenic_region	MODIFIER	BOH78_4316-BOH78_4317	BOH78_4316-BOH78_4317	intergenic_region	BOH78_4316-BOH78_4317	n.69441T>A
BOH78_Sc038	39533	A	*,T	upstream_gene_variant	MODIFIER	L	FAT1	BOH78_4620	BOH78_4620	transcript	ONH71276	protein_coding	c.-57A>T	57	,T	intergenic_region	MODIFIER	BOH78_4619-BOH78_4620	BOH78_4619-BOH78_4620	intergenic_region	BOH78_4619-BOH78_4620	n.39533A>T
BOH78_Sc038	39219	G	A	upstream_gene_variant	MODIFIER	L	FAT1	BOH78_4620	BOH78_4620	transcript	ONH71276	protein_coding	c.-371G>A	371	,A	intergenic_region	MODIFIER	BOH78_4619-BOH78_4620	BOH78_4619-BOH78_4620	intergenic_region	BOH78_4619-BOH78_4620	n.39219G>A
BOH78_Sc038	39365	A	G	upstream_gene_variant	MODIFIER	L	FAT1	BOH78_4620	BOH78_4620	transcript	ONH71276	protein_coding	c.-225A>G	225	,G	intergenic_region	MODIFIER	BOH78_4619-BOH78_4620	BOH78_4619-BOH78_4620	intergenic_region	BOH78_4619-BOH78_4620	n.39365A>G
BOH78_Sc038	39539	A	*,T	upstream_gene_variant	MODIFIER	L	FAT1	BOH78_4620	BOH78_4620	transcript	ONH71276	protein_coding	c.-51A>T	51	,T	intergenic_region	MODIFIER	BOH78_4619-BOH78_4620	BOH78_4619-BOH78_4620	intergenic_region	BOH78_4619-BOH78_4620	n.39539A>T
BOH78_Sc001	432136	T	C	3_prime_UTR_variant	MODIFIER				BOH78_0205	transcript	ONH77873	protein_coding	2023-01-01	c.*46T>C	46
BOH78_Sc002	38152	C	A	5_prime_UTR_variant	MODIFIER				BOH78_0381	transcript	ONH77352	protein_coding	2023-02-01	c.-36C>A	36	WARNING_TRANSCRIPT_NO_STOP_CODON,A	upstream_gene_variant	MODIFIER	BOH78_0380	BOH78_0380	transcript	ONH77353	protein_coding	c.-277G>T	277
BOH78_Sc004	30397	G	A	5_prime_UTR_variant	MODIFIER				BOH78_1041	transcript	ONH76276	protein_coding	2023-02-01	c.-7C>T	7	WARNING_TRANSCRIPT_NO_STOP_CODON
BOH78_Sc027	79628	G	T	5_prime_UTR_variant	MODIFIER				BOH78_4222	transcript	ONH71865	protein_coding	2023-02-01	c.-28G>T	28	WARNING_TRANSCRIPT_NO_STOP_CODON,T	downstream_gene_variant	MODIFIER	BOH78_4221	BOH78_4221	transcript	ONH71864	protein_coding	c.*266G>T	266
BOH78_Sc001	5154	G	A	downstream_gene_variant	MODIFIER				BOH78_0002	transcript	ONH77704	protein_coding	c.*2G>A	2	,A	downstream_gene_variant	MODIFIER	BOH78_0003	BOH78_0003	transcript	ONH77705	protein_coding	c.*27C>T	27	,A	intergenic_region	MODIFIER	BOH78_0002-BOH78_0003	BOH78_0002-BOH78_0003	intergenic_region	BOH78_0002-BOH78_0003	n.5154G>A
BOH78_Sc001	5032	A	G	downstream_gene_variant	MODIFIER				BOH78_0003	transcript	ONH77705	protein_coding	c.*149T>C	149	,G	intron_variant	MODIFIER	BOH78_0002	BOH78_0002	transcript	ONH77704	protein_coding	2023-01-01	c.2695-97A>G
BOH78_Sc001	16768	T	G	downstream_gene_variant	MODIFIER				BOH78_0008	transcript	ONH77709	protein_coding	c.*381T>G	381	,G	intergenic_region	MODIFIER	BOH78_0008-BOH78_0009	BOH78_0008-BOH78_0009	intergenic_region	BOH78_0008-BOH78_0009	n.16768T>G
BOH78_Sc001	16885	C	T	downstream_gene_variant	MODIFIER				BOH78_0008	transcript	ONH77709	protein_coding	c.*498C>T	498	,T	intergenic_region	MODIFIER	BOH78_0008-BOH78_0009	BOH78_0008-BOH78_0009	intergenic_region	BOH78_0008-BOH78_0009	n.16885C>T
BOH78_Sc001	16795	T	C	downstream_gene_variant	MODIFIER				BOH78_0008	transcript	ONH77709	protein_coding	c.*408T>C	408	,C	intergenic_region	MODIFIER	BOH78_0008-BOH78_0009	BOH78_0008-BOH78_0009	intergenic_region	BOH78_0008-BOH78_0009	n.16795T>C
BOH78_Sc001	16804	C	T	downstream_gene_variant	MODIFIER				BOH78_0008	transcript	ONH77709	protein_coding	c.*417C>T	417	,T	intergenic_region	MODIFIER	BOH78_0008-BOH78_0009	BOH78_0008-BOH78_0009	intergenic_region	BOH78_0008-BOH78_0009	n.16804C>T
BOH78_Sc001	18134	A	G	downstream_gene_variant	MODIFIER				BOH78_0009	transcript	ONH77710	protein_coding	c.*422T>C	422	,G	intergenic_region	MODIFIER	BOH78_0008-BOH78_0009	BOH78_0008-BOH78_0009	intergenic_region	BOH78_0008-BOH78_0009	n.18134A>G
BOH78_Sc001	18437	G	T	downstream_gene_variant	MODIFIER				BOH78_0009	transcript	ONH77710	protein_coding	c.*119C>A	119	,T	intergenic_region	MODIFIER	BOH78_0008-BOH78_0009	BOH78_0008-BOH78_0009	intergenic_region	BOH78_0008-BOH78_0009	n.18437G>T
BOH78_Sc001	18240	A	T	downstream_gene_variant	MODIFIER				BOH78_0009	transcript	ONH77710	protein_coding	c.*316T>A	316	,T	intergenic_region	MODIFIER	BOH78_0008-BOH78_0009	BOH78_0008-BOH78_0009	intergenic_region	BOH78_0008-BOH78_0009	n.18240A>T
BOH78_Sc001	18180	T	C	downstream_gene_variant	MODIFIER				BOH78_0009	transcript	ONH77710	protein_coding	c.*376A>G	376	,C	intergenic_region	MODIFIER	BOH78_0008-BOH78_0009	BOH78_0008-BOH78_0009	intergenic_region	BOH78_0008-BOH78_0009	n.18180T>C
BOH78_Sc001	21557	A	G	downstream_gene_variant	MODIFIER				BOH78_0010	transcript	ONH77885	protein_coding	c.*117A>G	117	,G	downstream_gene_variant	MODIFIER	BOH78_0011	BOH78_0011	transcript	ONH77884	protein_coding	c.*110T>C	110	,G	intergenic_region	MODIFIER	BOH78_0010-BOH78_0011	BOH78_0010-BOH78_0011	intergenic_region	BOH78_0010-BOH78_0011	n.21557A>G
BOH78_Sc001	39175	C	T	downstream_gene_variant	MODIFIER				BOH78_0020	transcript	ONH77688	protein_coding	c.*26C>T	26	,T	downstream_gene_variant	MODIFIER	BOH78_0021	BOH78_0021	transcript	ONH77689	protein_coding	c.*93G>A	93	,T	intergenic_region	MODIFIER	BOH78_0020-BOH78_0021	BOH78_0020-BOH78_0021	intergenic_region	BOH78_0020-BOH78_0021	n.39175C>T
BOH78_Sc001	39172	A	G	downstream_gene_variant	MODIFIER				BOH78_0020	transcript	ONH77688	protein_coding	c.*23A>G	23	,G	downstream_gene_variant	MODIFIER	BOH78_0021	BOH78_0021	transcript	ONH77689	protein_coding	c.*96T>C	96	,G	intergenic_region	MODIFIER	BOH78_0020-BOH78_0021	BOH78_0020-BOH78_0021	intergenic_region	BOH78_0020-BOH78_0021	n.39172A>G
BOH78_Sc001	39261	A	C	downstream_gene_variant	MODIFIER				BOH78_0020	transcript	ONH77688	protein_coding	c.*112A>C	112	,C	downstream_gene_variant	MODIFIER	BOH78_0021	BOH78_0021	transcript	ONH77689	protein_coding	c.*7T>G	7	,C	intergenic_region	MODIFIER	BOH78_0020-BOH78_0021	BOH78_0020-BOH78_0021	intergenic_region	BOH78_0020-BOH78_0021	n.39261A>C
BOH78_Sc001	44623	C	T	downstream_gene_variant	MODIFIER				BOH78_0024	transcript	ONH77692	protein_coding	c.*266C>T	266	,T	downstream_gene_variant	MODIFIER	BOH78_0025	BOH78_0025	transcript	ONH77693	protein_coding	c.*132G>A	132	,T	intergenic_region	MODIFIER	BOH78_0024-BOH78_0025	BOH78_0024-BOH78_0025	intergenic_region	BOH78_0024-BOH78_0025	n.44623C>T
BOH78_Sc001	49720	A	G	downstream_gene_variant	MODIFIER				BOH78_0027	transcript	ONH77691	protein_coding	c.*57A>G	57	,G	downstream_gene_variant	MODIFIER	BOH78_0028	BOH78_0028	transcript	ONH77684	protein_coding	c.*22T>C	22	,G	intergenic_region	MODIFIER	BOH78_0027-BOH78_0028	BOH78_0027-BOH78_0028	intergenic_region	BOH78_0027-BOH78_0028	n.49720A>G
BOH78_Sc001	54573	G	A	downstream_gene_variant	MODIFIER				BOH78_0031	transcript	ONH77858	protein_coding	c.*141C>T	141	,A	intergenic_region	MODIFIER	BOH78_0030-BOH78_0031	BOH78_0030-BOH78_0031	intergenic_region	BOH78_0030-BOH78_0031	n.54573G>A
BOH78_Sc001	54221	A	*,G	downstream_gene_variant	MODIFIER				BOH78_0031	transcript	ONH77858	protein_coding	c.*493T>C	493	,G	intergenic_region	MODIFIER	BOH78_0030-BOH78_0031	BOH78_0030-BOH78_0031	intergenic_region	BOH78_0030-BOH78_0031	n.54221A>G
BOH78_Sc001	54678	C	T	downstream_gene_variant	MODIFIER				BOH78_0031	transcript	ONH77858	protein_coding	c.*36G>A	36	,T	intergenic_region	MODIFIER	BOH78_0030-BOH78_0031	BOH78_0030-BOH78_0031	intergenic_region	BOH78_0030-BOH78_0031	n.54678C>T
BOH78_Sc001	54662	C	T	downstream_gene_variant	MODIFIER				BOH78_0031	transcript	ONH77858	protein_coding	c.*52G>A	52	,T	intergenic_region	MODIFIER	BOH78_0030-BOH78_0031	BOH78_0030-BOH78_0031	intergenic_region	BOH78_0030-BOH78_0031	n.54662C>T
BOH78_Sc001	54512	T	C	downstream_gene_variant	MODIFIER				BOH78_0031	transcript	ONH77858	protein_coding	c.*202A>G	202	,C	intergenic_region	MODIFIER	BOH78_0030-BOH78_0031	BOH78_0030-BOH78_0031	intergenic_region	BOH78_0030-BOH78_0031	n.54512T>C
BOH78_Sc001	54659	C	T	downstream_gene_variant	MODIFIER				BOH78_0031	transcript	ONH77858	protein_coding	c.*55G>A	55	,T	intergenic_region	MODIFIER	BOH78_0030-BOH78_0031	BOH78_0030-BOH78_0031	intergenic_region	BOH78_0030-BOH78_0031	n.54659C>T
BOH78_Sc001	54695	G	A	downstream_gene_variant	MODIFIER				BOH78_0031	transcript	ONH77858	protein_coding	c.*19C>T	19	,A	intergenic_region	MODIFIER	BOH78_0030-BOH78_0031	BOH78_0030-BOH78_0031	intergenic_region	BOH78_0030-BOH78_0031	n.54695G>A
BOH78_Sc001	54411	A	G	downstream_gene_variant	MODIFIER				BOH78_0031	transcript	ONH77858	protein_coding	c.*303T>C	303	,G	intergenic_region	MODIFIER	BOH78_0030-BOH78_0031	BOH78_0030-BOH78_0031	intergenic_region	BOH78_0030-BOH78_0031	n.54411A>G
BOH78_Sc001	64558	A	C	downstream_gene_variant	MODIFIER				BOH78_0034	transcript	ONH77863	protein_coding	c.*121A>C	121	,C	downstream_gene_variant	MODIFIER	BOH78_0035	BOH78_0035	transcript	ONH77862	protein_coding	c.*176T>G	176	,C	intergenic_region	MODIFIER	BOH78_0034-BOH78_0035	BOH78_0034-BOH78_0035	intergenic_region	BOH78_0034-BOH78_0035	n.64558A>C
BOH78_Sc001	64636	G	A	downstream_gene_variant	MODIFIER				BOH78_0034	transcript	ONH77863	protein_coding	c.*199G>A	199	,A	downstream_gene_variant	MODIFIER	BOH78_0035	BOH78_0035	transcript	ONH77862	protein_coding	c.*98C>T	98	,A	intergenic_region	MODIFIER	BOH78_0034-BOH78_0035	BOH78_0034-BOH78_0035	intergenic_region	BOH78_0034-BOH78_0035	n.64636G>A
BOH78_Sc001	70459	T	A	downstream_gene_variant	MODIFIER				BOH78_0037	transcript	ONH77864	protein_coding	c.*37T>A	37	,A	downstream_gene_variant	MODIFIER	BOH78_0038	BOH78_0038	transcript	ONH77857	protein_coding	c.*59A>T	59	,A	intergenic_region	MODIFIER	BOH78_0037-BOH78_0038	BOH78_0037-BOH78_0038	intergenic_region	BOH78_0037-BOH78_0038	n.70459T>A
BOH78_Sc001	75284	T	C	downstream_gene_variant	MODIFIER				BOH78_0041	transcript	ONH77754	protein_coding	c.*263A>G	263	,C	intron_variant	MODIFIER	BOH78_0040	BOH78_0040	transcript	ONH77753	protein_coding	2023-01-01	c.1296-112T>C
BOH78_Sc001	75061	A	G	downstream_gene_variant	MODIFIER				BOH78_0041	transcript	ONH77754	protein_coding	c.*486T>C	486	,G	intron_variant	MODIFIER	BOH78_0040	BOH78_0040	transcript	ONH77753	protein_coding	2023-01-01	c.1295+68A>G
BOH78_Sc001	84314	T	G	downstream_gene_variant	MODIFIER				BOH78_0045	transcript	ONH77750	protein_coding	c.*34T>G	34	,G	intergenic_region	MODIFIER	BOH78_0045-BOH78_0046	BOH78_0045-BOH78_0046	intergenic_region	BOH78_0045-BOH78_0046	n.84314T>G
BOH78_Sc001	84300	G	T	downstream_gene_variant	MODIFIER				BOH78_0045	transcript	ONH77750	protein_coding	c.*20G>T	20	,T	intergenic_region	MODIFIER	BOH78_0045-BOH78_0046	BOH78_0045-BOH78_0046	intergenic_region	BOH78_0045-BOH78_0046	n.84300G>T
BOH78_Sc001	84315	T	C	downstream_gene_variant	MODIFIER				BOH78_0045	transcript	ONH77750	protein_coding	c.*35T>C	35	,C	intergenic_region	MODIFIER	BOH78_0045-BOH78_0046	BOH78_0045-BOH78_0046	intergenic_region	BOH78_0045-BOH78_0046	n.84315T>C
BOH78_Sc001	84440	A	G	downstream_gene_variant	MODIFIER				BOH78_0045	transcript	ONH77750	protein_coding	c.*160A>G	160	,G	intergenic_region	MODIFIER	BOH78_0045-BOH78_0046	BOH78_0045-BOH78_0046	intergenic_region	BOH78_0045-BOH78_0046	n.84440A>G
BOH78_Sc001	85437	C	T	downstream_gene_variant	MODIFIER				BOH78_0046	transcript	ONH77751	protein_coding	c.*137C>T	137	,T	downstream_gene_variant	MODIFIER	BOH78_0047	BOH78_0047	transcript	ONH77752	protein_coding	c.*49G>A	49	,T	intergenic_region	MODIFIER	BOH78_0046-BOH78_0047	BOH78_0046-BOH78_0047	intergenic_region	BOH78_0046-BOH78_0047	n.85437C>T
BOH78_Sc001	85442	G	A	downstream_gene_variant	MODIFIER				BOH78_0046	transcript	ONH77751	protein_coding	c.*142G>A	142	,A	downstream_gene_variant	MODIFIER	BOH78_0047	BOH78_0047	transcript	ONH77752	protein_coding	c.*44C>T	44	,A	intergenic_region	MODIFIER	BOH78_0046-BOH78_0047	BOH78_0046-BOH78_0047	intergenic_region	BOH78_0046-BOH78_0047	n.85442G>A
BOH78_Sc001	91804	C	T	downstream_gene_variant	MODIFIER				BOH78_0048	transcript	ONH77747	protein_coding	c.*64C>T	64	,T	downstream_gene_variant	MODIFIER	BOH78_0049	BOH78_0049	transcript	ONH77748	protein_coding	c.*191G>A	191	,T	intergenic_region	MODIFIER	BOH78_0048-BOH78_0049	BOH78_0048-BOH78_0049	intergenic_region	BOH78_0048-BOH78_0049	n.91804C>T
BOH78_Sc001	94352	C	T	downstream_gene_variant	MODIFIER				BOH78_0051	transcript	ONH77916	protein_coding	c.*301C>T	301	,T	downstream_gene_variant	MODIFIER	BOH78_0052	BOH78_0052	transcript	ONH77915	protein_coding	c.*336G>A	336	,T	intergenic_region	MODIFIER	BOH78_0051-BOH78_0052	BOH78_0051-BOH78_0052	intergenic_region	BOH78_0051-BOH78_0052	n.94352C>T
BOH78_Sc001	94578	T	C	downstream_gene_variant	MODIFIER				BOH78_0052	transcript	ONH77915	protein_coding	c.*110A>G	110	,C	intergenic_region	MODIFIER	BOH78_0051-BOH78_0052	BOH78_0051-BOH78_0052	intergenic_region	BOH78_0051-BOH78_0052	n.94578T>C
BOH78_Sc001	94592	A	G	downstream_gene_variant	MODIFIER				BOH78_0052	transcript	ONH77915	protein_coding	c.*96T>C	96	,G	intergenic_region	MODIFIER	BOH78_0051-BOH78_0052	BOH78_0051-BOH78_0052	intergenic_region	BOH78_0051-BOH78_0052	n.94592A>G
BOH78_Sc001	94604	A	G	downstream_gene_variant	MODIFIER				BOH78_0052	transcript	ONH77915	protein_coding	c.*84T>C	84	,G	intergenic_region	MODIFIER	BOH78_0051-BOH78_0052	BOH78_0051-BOH78_0052	intergenic_region	BOH78_0051-BOH78_0052	n.94604A>G
BOH78_Sc001	101547	C	G	downstream_gene_variant	MODIFIER				BOH78_0053	transcript	ONH77914	protein_coding	c.*40C>G	40	,G	downstream_gene_variant	MODIFIER	BOH78_0054	BOH78_0054	transcript	ONH77921	protein_coding	c.*75G>C	75	,G	intergenic_region	MODIFIER	BOH78_0053-BOH78_0054	BOH78_0053-BOH78_0054	intergenic_region	BOH78_0053-BOH78_0054	n.101547C>G
BOH78_Sc001	110933	G	A	downstream_gene_variant	MODIFIER				BOH78_0056	transcript	ONH77919	protein_coding	c.*331C>T	331	,A	intergenic_region	MODIFIER	BOH78_0055-BOH78_0056	BOH78_0055-BOH78_0056	intergenic_region	BOH78_0055-BOH78_0056	n.110933G>A
BOH78_Sc001	117340	T	C	downstream_gene_variant	MODIFIER				BOH78_0057	transcript	ONH77918	protein_coding	c.*321T>C	321	,C	intergenic_region	MODIFIER	BOH78_0057-BOH78_0058	BOH78_0057-BOH78_0058	intergenic_region	BOH78_0057-BOH78_0058	n.117340T>C
BOH78_Sc001	117666	C	G	downstream_gene_variant	MODIFIER				BOH78_0058	transcript	ONH77913	protein_coding	c.*327G>C	327	,G	intergenic_region	MODIFIER	BOH78_0057-BOH78_0058	BOH78_0057-BOH78_0058	intergenic_region	BOH78_0057-BOH78_0058	n.117666C>G
BOH78_Sc001	117682	C	T	downstream_gene_variant	MODIFIER				BOH78_0058	transcript	ONH77913	protein_coding	c.*311G>A	311	,T	intergenic_region	MODIFIER	BOH78_0057-BOH78_0058	BOH78_0057-BOH78_0058	intergenic_region	BOH78_0057-BOH78_0058	n.117682C>T
BOH78_Sc001	125771	C	*,T	downstream_gene_variant	MODIFIER				BOH78_0061	transcript	ONH77732	protein_coding	c.*196C>T	196	,T	intergenic_region	MODIFIER	BOH78_0061-BOH78_0062	BOH78_0061-BOH78_0062	intergenic_region	BOH78_0061-BOH78_0062	n.125771C>T
BOH78_Sc001	125695	A	C	downstream_gene_variant	MODIFIER				BOH78_0061	transcript	ONH77732	protein_coding	c.*120A>C	120	,C	intergenic_region	MODIFIER	BOH78_0061-BOH78_0062	BOH78_0061-BOH78_0062	intergenic_region	BOH78_0061-BOH78_0062	n.125695A>C
BOH78_Sc001	125723	T	A	downstream_gene_variant	MODIFIER				BOH78_0061	transcript	ONH77732	protein_coding	c.*148T>A	148	,A	intergenic_region	MODIFIER	BOH78_0061-BOH78_0062	BOH78_0061-BOH78_0062	intergenic_region	BOH78_0061-BOH78_0062	n.125723T>A
BOH78_Sc001	125745	C	A	downstream_gene_variant	MODIFIER				BOH78_0061	transcript	ONH77732	protein_coding	c.*170C>A	170	,A	intergenic_region	MODIFIER	BOH78_0061-BOH78_0062	BOH78_0061-BOH78_0062	intergenic_region	BOH78_0061-BOH78_0062	n.125745C>A
BOH78_Sc001	125779	C	T	downstream_gene_variant	MODIFIER				BOH78_0061	transcript	ONH77732	protein_coding	c.*204C>T	204	,T	intergenic_region	MODIFIER	BOH78_0061-BOH78_0062	BOH78_0061-BOH78_0062	intergenic_region	BOH78_0061-BOH78_0062	n.125779C>T
BOH78_Sc001	129537	A	T	downstream_gene_variant	MODIFIER				BOH78_0064	transcript	ONH77727	protein_coding	c.*19A>T	19	,T	downstream_gene_variant	MODIFIER	BOH78_0065	BOH78_0065	transcript	ONH77728	protein_coding	c.*90T>A	90	,T	intergenic_region	MODIFIER	BOH78_0064-BOH78_0065	BOH78_0064-BOH78_0065	intergenic_region	BOH78_0064-BOH78_0065	n.129537A>T
BOH78_Sc001	129604	C	T	downstream_gene_variant	MODIFIER				BOH78_0064	transcript	ONH77727	protein_coding	c.*86C>T	86	,T	downstream_gene_variant	MODIFIER	BOH78_0065	BOH78_0065	transcript	ONH77728	protein_coding	c.*23G>A	23	,T	intergenic_region	MODIFIER	BOH78_0064-BOH78_0065	BOH78_0064-BOH78_0065	intergenic_region	BOH78_0064-BOH78_0065	n.129604C>T
BOH78_Sc001	129605	T	G	downstream_gene_variant	MODIFIER				BOH78_0064	transcript	ONH77727	protein_coding	c.*87T>G	87	,G	downstream_gene_variant	MODIFIER	BOH78_0065	BOH78_0065	transcript	ONH77728	protein_coding	c.*22A>C	22	,G	intergenic_region	MODIFIER	BOH78_0064-BOH78_0065	BOH78_0064-BOH78_0065	intergenic_region	BOH78_0064-BOH78_0065	n.129605T>G
BOH78_Sc001	142676	T	C	downstream_gene_variant	MODIFIER				BOH78_0070	transcript	ONH77897	protein_coding	c.*131T>C	131	,C	downstream_gene_variant	MODIFIER	BOH78_0071	BOH78_0071	transcript	ONH77896	protein_coding	c.*117A>G	117	,C	intergenic_region	MODIFIER	BOH78_0070-BOH78_0071	BOH78_0070-BOH78_0071	intergenic_region	BOH78_0070-BOH78_0071	n.142676T>C
BOH78_Sc001	144214	A	C	downstream_gene_variant	MODIFIER				BOH78_0072	transcript	ONH77899	protein_coding	c.*225T>G	225	,C	intergenic_region	MODIFIER	BOH78_0071-BOH78_0072	BOH78_0071-BOH78_0072	intergenic_region	BOH78_0071-BOH78_0072	n.144214A>C
BOH78_Sc001	144343	A	G	downstream_gene_variant	MODIFIER				BOH78_0072	transcript	ONH77899	protein_coding	c.*96T>C	96	,G	intergenic_region	MODIFIER	BOH78_0071-BOH78_0072	BOH78_0071-BOH78_0072	intergenic_region	BOH78_0071-BOH78_0072	n.144343A>G
BOH78_Sc001	152177	T	A	downstream_gene_variant	MODIFIER				BOH78_0074	transcript	ONH77893	protein_coding	c.*156T>A	156	,A	downstream_gene_variant	MODIFIER	BOH78_0075	BOH78_0075	transcript	ONH77892	protein_coding	c.*56A>T	56	,A	intergenic_region	MODIFIER	BOH78_0074-BOH78_0075	BOH78_0074-BOH78_0075	intergenic_region	BOH78_0074-BOH78_0075	n.152177T>A
BOH78_Sc001	152087	A	C	downstream_gene_variant	MODIFIER				BOH78_0074	transcript	ONH77893	protein_coding	c.*66A>C	66	,C	downstream_gene_variant	MODIFIER	BOH78_0075	BOH78_0075	transcript	ONH77892	protein_coding	c.*146T>G	146	,C	intergenic_region	MODIFIER	BOH78_0074-BOH78_0075	BOH78_0074-BOH78_0075	intergenic_region	BOH78_0074-BOH78_0075	n.152087A>C
BOH78_Sc001	160436	T	G	downstream_gene_variant	MODIFIER				BOH78_0080	transcript	ONH77760	protein_coding	c.*335T>G	335	,G	downstream_gene_variant	MODIFIER	BOH78_0081	BOH78_0081	transcript	ONH77761	protein_coding	c.*100A>C	100	,G	intergenic_region	MODIFIER	BOH78_0080-BOH78_0081	BOH78_0080-BOH78_0081	intergenic_region	BOH78_0080-BOH78_0081	n.160436T>G
BOH78_Sc001	160135	C	T	downstream_gene_variant	MODIFIER				BOH78_0080	transcript	ONH77760	protein_coding	c.*34C>T	34	,T	downstream_gene_variant	MODIFIER	BOH78_0081	BOH78_0081	transcript	ONH77761	protein_coding	c.*401G>A	401	,T	intergenic_region	MODIFIER	BOH78_0080-BOH78_0081	BOH78_0080-BOH78_0081	intergenic_region	BOH78_0080-BOH78_0081	n.160135C>T
BOH78_Sc001	173880	A	G	downstream_gene_variant	MODIFIER				BOH78_0088	transcript	ONH77660	protein_coding	c.*41A>G	41	,G	downstream_gene_variant	MODIFIER	BOH78_0089	BOH78_0089	transcript	ONH77661	protein_coding	c.*67T>C	67	,G	intergenic_region	MODIFIER	BOH78_0088-BOH78_0089	BOH78_0088-BOH78_0089	intergenic_region	BOH78_0088-BOH78_0089	n.173880A>G
BOH78_Sc001	178669	C	*,T	downstream_gene_variant	MODIFIER				BOH78_0091	transcript	ONH77576	protein_coding	c.*296G>A	296	,T	intergenic_region	MODIFIER	BOH78_0090-BOH78_0091	BOH78_0090-BOH78_0091	intergenic_region	BOH78_0090-BOH78_0091	n.178669C>T
BOH78_Sc001	178594	G	C	downstream_gene_variant	MODIFIER				BOH78_0091	transcript	ONH77576	protein_coding	c.*371C>G	371	,C	intergenic_region	MODIFIER	BOH78_0090-BOH78_0091	BOH78_0090-BOH78_0091	intergenic_region	BOH78_0090-BOH78_0091	n.178594G>C
BOH78_Sc001	178627	G	C	downstream_gene_variant	MODIFIER				BOH78_0091	transcript	ONH77576	protein_coding	c.*338C>G	338	,C	intergenic_region	MODIFIER	BOH78_0090-BOH78_0091	BOH78_0090-BOH78_0091	intergenic_region	BOH78_0090-BOH78_0091	n.178627G>C
BOH78_Sc001	178886	A	G	downstream_gene_variant	MODIFIER				BOH78_0091	transcript	ONH77576	protein_coding	c.*79T>C	79	,G	intergenic_region	MODIFIER	BOH78_0090-BOH78_0091	BOH78_0090-BOH78_0091	intergenic_region	BOH78_0090-BOH78_0091	n.178886A>G
BOH78_Sc001	186198	G	A	downstream_gene_variant	MODIFIER				BOH78_0093	transcript	ONH77574	protein_coding	c.*230G>A	230	,A	downstream_gene_variant	MODIFIER	BOH78_0094	BOH78_0094	transcript	ONH77573	protein_coding	c.*28C>T	28	,A	intergenic_region	MODIFIER	BOH78_0093-BOH78_0094	BOH78_0093-BOH78_0094	intergenic_region	BOH78_0093-BOH78_0094	n.186198G>A
BOH78_Sc001	186173	T	C	downstream_gene_variant	MODIFIER				BOH78_0093	transcript	ONH77574	protein_coding	c.*205T>C	205	,C	downstream_gene_variant	MODIFIER	BOH78_0094	BOH78_0094	transcript	ONH77573	protein_coding	c.*53A>G	53	,C	intergenic_region	MODIFIER	BOH78_0093-BOH78_0094	BOH78_0093-BOH78_0094	intergenic_region	BOH78_0093-BOH78_0094	n.186173T>C
BOH78_Sc001	190711	T	G	downstream_gene_variant	MODIFIER				BOH78_0095	transcript	ONH77572	protein_coding	c.*64T>G	64	,G	downstream_gene_variant	MODIFIER	BOH78_0096	BOH78_0096	transcript	ONH77571	protein_coding	c.*35A>C	35	,G	intergenic_region	MODIFIER	BOH78_0095-BOH78_0096	BOH78_0095-BOH78_0096	intergenic_region	BOH78_0095-BOH78_0096	n.190711T>G
BOH78_Sc001	190689	G	A	downstream_gene_variant	MODIFIER				BOH78_0095	transcript	ONH77572	protein_coding	c.*42G>A	42	,A	downstream_gene_variant	MODIFIER	BOH78_0096	BOH78_0096	transcript	ONH77571	protein_coding	c.*57C>T	57	,A	intergenic_region	MODIFIER	BOH78_0095-BOH78_0096	BOH78_0095-BOH78_0096	intergenic_region	BOH78_0095-BOH78_0096	n.190689G>A
BOH78_Sc001	195919	G	A	downstream_gene_variant	MODIFIER				BOH78_0098	transcript	ONH77579	protein_coding	c.*108G>A	108	,A	intergenic_region	MODIFIER	BOH78_0098-BOH78_0099	BOH78_0098-BOH78_0099	intergenic_region	BOH78_0098-BOH78_0099	n.195919G>A
BOH78_Sc001	200869	A	G	downstream_gene_variant	MODIFIER				BOH78_0103	transcript	ONH77614	protein_coding	c.*473T>C	473	,G	intergenic_region	MODIFIER	BOH78_0102-BOH78_0103	BOH78_0102-BOH78_0103	intergenic_region	BOH78_0102-BOH78_0103	n.200869A>G
BOH78_Sc001	201020	T	C	downstream_gene_variant	MODIFIER				BOH78_0103	transcript	ONH77614	protein_coding	c.*322A>G	322	,C	intergenic_region	MODIFIER	BOH78_0102-BOH78_0103	BOH78_0102-BOH78_0103	intergenic_region	BOH78_0102-BOH78_0103	n.201020T>C
BOH78_Sc001	209009	C	T	downstream_gene_variant	MODIFIER				BOH78_0106	transcript	ONH77619	protein_coding	c.*96C>T	96	,T	downstream_gene_variant	MODIFIER	BOH78_0107	BOH78_0107	transcript	ONH77618	protein_coding	c.*50G>A	50	,T	intergenic_region	MODIFIER	BOH78_0106-BOH78_0107	BOH78_0106-BOH78_0107	intergenic_region	BOH78_0106-BOH78_0107	n.209009C>T
BOH78_Sc001	208950	A	G	downstream_gene_variant	MODIFIER				BOH78_0106	transcript	ONH77619	protein_coding	c.*37A>G	37	,G	downstream_gene_variant	MODIFIER	BOH78_0107	BOH78_0107	transcript	ONH77618	protein_coding	c.*109T>C	109	,G	intergenic_region	MODIFIER	BOH78_0106-BOH78_0107	BOH78_0106-BOH78_0107	intergenic_region	BOH78_0106-BOH78_0107	n.208950A>G
BOH78_Sc001	216959	A	G	downstream_gene_variant	MODIFIER				BOH78_0111	transcript	ONH77801	protein_coding	c.*18T>C	18	,G	intergenic_region	MODIFIER	BOH78_0110-BOH78_0111	BOH78_0110-BOH78_0111	intergenic_region	BOH78_0110-BOH78_0111	n.216959A>G
BOH78_Sc001	216940	T	A	downstream_gene_variant	MODIFIER				BOH78_0111	transcript	ONH77801	protein_coding	c.*37A>T	37	,A	intergenic_region	MODIFIER	BOH78_0110-BOH78_0111	BOH78_0110-BOH78_0111	intergenic_region	BOH78_0110-BOH78_0111	n.216940T>A
BOH78_Sc001	218753	C	T	downstream_gene_variant	MODIFIER				BOH78_0112	transcript	ONH77798	protein_coding	c.*19C>T	19	,T	intergenic_region	MODIFIER	BOH78_0112-BOH78_0113	BOH78_0112-BOH78_0113	intergenic_region	BOH78_0112-BOH78_0113	n.218753C>T
BOH78_Sc001	219219	T	C	downstream_gene_variant	MODIFIER				BOH78_0112	transcript	ONH77798	protein_coding	c.*485T>C	485	,C	intergenic_region	MODIFIER	BOH78_0112-BOH78_0113	BOH78_0112-BOH78_0113	intergenic_region	BOH78_0112-BOH78_0113	n.219219T>C
BOH78_Sc001	218824	C	A	downstream_gene_variant	MODIFIER				BOH78_0112	transcript	ONH77798	protein_coding	c.*90C>A	90	,A	intergenic_region	MODIFIER	BOH78_0112-BOH78_0113	BOH78_0112-BOH78_0113	intergenic_region	BOH78_0112-BOH78_0113	n.218824C>A
BOH78_Sc001	218816	C	A	downstream_gene_variant	MODIFIER				BOH78_0112	transcript	ONH77798	protein_coding	c.*82C>A	82	,A	intergenic_region	MODIFIER	BOH78_0112-BOH78_0113	BOH78_0112-BOH78_0113	intergenic_region	BOH78_0112-BOH78_0113	n.218816C>A
BOH78_Sc001	219064	T	A	downstream_gene_variant	MODIFIER				BOH78_0112	transcript	ONH77798	protein_coding	c.*330T>A	330	,A	intergenic_region	MODIFIER	BOH78_0112-BOH78_0113	BOH78_0112-BOH78_0113	intergenic_region	BOH78_0112-BOH78_0113	n.219064T>A
BOH78_Sc001	219046	A	G	downstream_gene_variant	MODIFIER				BOH78_0112	transcript	ONH77798	protein_coding	c.*312A>G	312	,G	intergenic_region	MODIFIER	BOH78_0112-BOH78_0113	BOH78_0112-BOH78_0113	intergenic_region	BOH78_0112-BOH78_0113	n.219046A>G
BOH78_Sc001	219052	T	C	downstream_gene_variant	MODIFIER				BOH78_0112	transcript	ONH77798	protein_coding	c.*318T>C	318	,C	intergenic_region	MODIFIER	BOH78_0112-BOH78_0113	BOH78_0112-BOH78_0113	intergenic_region	BOH78_0112-BOH78_0113	n.219052T>C
BOH78_Sc001	219785	T	C	downstream_gene_variant	MODIFIER				BOH78_0113	transcript	ONH77799	protein_coding	c.*275A>G	275	,C	intergenic_region	MODIFIER	BOH78_0112-BOH78_0113	BOH78_0112-BOH78_0113	intergenic_region	BOH78_0112-BOH78_0113	n.219785T>C
BOH78_Sc001	219998	T	A	downstream_gene_variant	MODIFIER				BOH78_0113	transcript	ONH77799	protein_coding	c.*62A>T	62	,A	intergenic_region	MODIFIER	BOH78_0112-BOH78_0113	BOH78_0112-BOH78_0113	intergenic_region	BOH78_0112-BOH78_0113	n.219998T>A
BOH78_Sc001	219753	A	G	downstream_gene_variant	MODIFIER				BOH78_0113	transcript	ONH77799	protein_coding	c.*307T>C	307	,G	intergenic_region	MODIFIER	BOH78_0112-BOH78_0113	BOH78_0112-BOH78_0113	intergenic_region	BOH78_0112-BOH78_0113	n.219753A>G
BOH78_Sc001	219897	T	A	downstream_gene_variant	MODIFIER				BOH78_0113	transcript	ONH77799	protein_coding	c.*163A>T	163	,A	intergenic_region	MODIFIER	BOH78_0112-BOH78_0113	BOH78_0112-BOH78_0113	intergenic_region	BOH78_0112-BOH78_0113	n.219897T>A
BOH78_Sc001	219882	T	A	downstream_gene_variant	MODIFIER				BOH78_0113	transcript	ONH77799	protein_coding	c.*178A>T	178	,A	intergenic_region	MODIFIER	BOH78_0112-BOH78_0113	BOH78_0112-BOH78_0113	intergenic_region	BOH78_0112-BOH78_0113	n.219882T>A
BOH78_Sc001	222568	T	C	downstream_gene_variant	MODIFIER				BOH78_0114	transcript	ONH77804	protein_coding	c.*146T>C	146	,C	downstream_gene_variant	MODIFIER	BOH78_0115	BOH78_0115	transcript	ONH77805	protein_coding	c.*342A>G	342	,C	intergenic_region	MODIFIER	BOH78_0114-BOH78_0115	BOH78_0114-BOH78_0115	intergenic_region	BOH78_0114-BOH78_0115	n.222568T>C
BOH78_Sc001	231014	T	C	downstream_gene_variant	MODIFIER				BOH78_0117	transcript	ONH77803	protein_coding	c.*167T>C	167	,C	intergenic_region	MODIFIER	BOH78_0117-BOH78_0118	BOH78_0117-BOH78_0118	intergenic_region	BOH78_0117-BOH78_0118	n.231014T>C
BOH78_Sc001	231017	C	T	downstream_gene_variant	MODIFIER				BOH78_0117	transcript	ONH77803	protein_coding	c.*170C>T	170	,T	intergenic_region	MODIFIER	BOH78_0117-BOH78_0118	BOH78_0117-BOH78_0118	intergenic_region	BOH78_0117-BOH78_0118	n.231017C>T
BOH78_Sc001	232027	C	T	downstream_gene_variant	MODIFIER				BOH78_0118	transcript	ONH77796	protein_coding	c.*385G>A	385	,T	intergenic_region	MODIFIER	BOH78_0117-BOH78_0118	BOH78_0117-BOH78_0118	intergenic_region	BOH78_0117-BOH78_0118	n.232027C>T
BOH78_Sc001	232153	G	T	downstream_gene_variant	MODIFIER				BOH78_0118	transcript	ONH77796	protein_coding	c.*259C>A	259	,T	intergenic_region	MODIFIER	BOH78_0117-BOH78_0118	BOH78_0117-BOH78_0118	intergenic_region	BOH78_0117-BOH78_0118	n.232153G>T
BOH78_Sc001	232244	A	G	downstream_gene_variant	MODIFIER				BOH78_0118	transcript	ONH77796	protein_coding	c.*168T>C	168	,G	intergenic_region	MODIFIER	BOH78_0117-BOH78_0118	BOH78_0117-BOH78_0118	intergenic_region	BOH78_0117-BOH78_0118	n.232244A>G
BOH78_Sc001	232098	C	T	downstream_gene_variant	MODIFIER				BOH78_0118	transcript	ONH77796	protein_coding	c.*314G>A	314	,T	intergenic_region	MODIFIER	BOH78_0117-BOH78_0118	BOH78_0117-BOH78_0118	intergenic_region	BOH78_0117-BOH78_0118	n.232098C>T
BOH78_Sc001	232100	A	G	downstream_gene_variant	MODIFIER				BOH78_0118	transcript	ONH77796	protein_coding	c.*312T>C	312	,G	intergenic_region	MODIFIER	BOH78_0117-BOH78_0118	BOH78_0117-BOH78_0118	intergenic_region	BOH78_0117-BOH78_0118	n.232100A>G
BOH78_Sc001	232302	G	A	downstream_gene_variant	MODIFIER				BOH78_0118	transcript	ONH77796	protein_coding	c.*110C>T	110	,A	intergenic_region	MODIFIER	BOH78_0117-BOH78_0118	BOH78_0117-BOH78_0118	intergenic_region	BOH78_0117-BOH78_0118	n.232302G>A
BOH78_Sc001	232279	G	C	downstream_gene_variant	MODIFIER				BOH78_0118	transcript	ONH77796	protein_coding	c.*133C>G	133	,C	intergenic_region	MODIFIER	BOH78_0117-BOH78_0118	BOH78_0117-BOH78_0118	intergenic_region	BOH78_0117-BOH78_0118	n.232279G>C
BOH78_Sc001	236499	T	A	downstream_gene_variant	MODIFIER				BOH78_0120	transcript	ONH77639	protein_coding	c.*376T>A	376	,A	intergenic_region	MODIFIER	BOH78_0120-BOH78_0121	BOH78_0120-BOH78_0121	intergenic_region	BOH78_0120-BOH78_0121	n.236499T>A
BOH78_Sc001	236466	T	C	downstream_gene_variant	MODIFIER				BOH78_0120	transcript	ONH77639	protein_coding	c.*343T>C	343	,C	intergenic_region	MODIFIER	BOH78_0120-BOH78_0121	BOH78_0120-BOH78_0121	intergenic_region	BOH78_0120-BOH78_0121	n.236466T>C
BOH78_Sc001	236494	C	A	downstream_gene_variant	MODIFIER				BOH78_0120	transcript	ONH77639	protein_coding	c.*371C>A	371	,A	intergenic_region	MODIFIER	BOH78_0120-BOH78_0121	BOH78_0120-BOH78_0121	intergenic_region	BOH78_0120-BOH78_0121	n.236494C>A
BOH78_Sc001	257250	A	G	downstream_gene_variant	MODIFIER				BOH78_0131	transcript	ONH77817	protein_coding	c.*307T>C	307	,G	intron_variant	MODIFIER	BOH78_0130	BOH78_0130	transcript	ONH77816	protein_coding	2023-01-01	c.725-62A>G
BOH78_Sc001	257190	C	T	downstream_gene_variant	MODIFIER				BOH78_0131	transcript	ONH77817	protein_coding	c.*367G>A	367	,T	intron_variant	MODIFIER	BOH78_0130	BOH78_0130	transcript	ONH77816	protein_coding	2023-01-01	c.725-122C>T
BOH78_Sc001	260706	G	A	downstream_gene_variant	MODIFIER				BOH78_0132	transcript	ONH77818	protein_coding	c.*414C>T	414	,A	intergenic_region	MODIFIER	BOH78_0131-BOH78_0132	BOH78_0131-BOH78_0132	intergenic_region	BOH78_0131-BOH78_0132	n.260706G>A
BOH78_Sc001	264592	G	A	downstream_gene_variant	MODIFIER				BOH78_0133	transcript	ONH77819	protein_coding	c.*60G>A	60	,A	downstream_gene_variant	MODIFIER	BOH78_0134	BOH78_0134	transcript	ONH77820	protein_coding	c.*4C>T	4	,A	intergenic_region	MODIFIER	BOH78_0133-BOH78_0134	BOH78_0133-BOH78_0134	intergenic_region	BOH78_0133-BOH78_0134	n.264592G>A
BOH78_Sc001	266006	C	T	downstream_gene_variant	MODIFIER				BOH78_0135	transcript	ONH77821	protein_coding	c.*287G>A	287	,T	intergenic_region	MODIFIER	BOH78_0134-BOH78_0135	BOH78_0134-BOH78_0135	intergenic_region	BOH78_0134-BOH78_0135	n.266006C>T
BOH78_Sc001	266111	T	C	downstream_gene_variant	MODIFIER				BOH78_0135	transcript	ONH77821	protein_coding	c.*182A>G	182	,C	intergenic_region	MODIFIER	BOH78_0134-BOH78_0135	BOH78_0134-BOH78_0135	intergenic_region	BOH78_0134-BOH78_0135	n.266111T>C
BOH78_Sc001	270875	A	C	downstream_gene_variant	MODIFIER				BOH78_0136	transcript	ONH77822	protein_coding	c.*160A>C	160	WARNING_TRANSCRIPT_NO_STOP_CODON,C	intergenic_region	MODIFIER	BOH78_0136-BOH78_0137	BOH78_0136-BOH78_0137	intergenic_region	BOH78_0136-BOH78_0137	n.270875A>C
BOH78_Sc001	270888	A	G	downstream_gene_variant	MODIFIER				BOH78_0136	transcript	ONH77822	protein_coding	c.*173A>G	173	WARNING_TRANSCRIPT_NO_STOP_CODON,G	intergenic_region	MODIFIER	BOH78_0136-BOH78_0137	BOH78_0136-BOH78_0137	intergenic_region	BOH78_0136-BOH78_0137	n.270888A>G
BOH78_Sc001	270878	T	C	downstream_gene_variant	MODIFIER				BOH78_0136	transcript	ONH77822	protein_coding	c.*163T>C	163	WARNING_TRANSCRIPT_NO_STOP_CODON,C	intergenic_region	MODIFIER	BOH78_0136-BOH78_0137	BOH78_0136-BOH78_0137	intergenic_region	BOH78_0136-BOH78_0137	n.270878T>C
BOH78_Sc001	271142	C	T	downstream_gene_variant	MODIFIER				BOH78_0136	transcript	ONH77822	protein_coding	c.*427C>T	427	WARNING_TRANSCRIPT_NO_STOP_CODON,T	intergenic_region	MODIFIER	BOH78_0136-BOH78_0137	BOH78_0136-BOH78_0137	intergenic_region	BOH78_0136-BOH78_0137	n.271142C>T
BOH78_Sc001	278828	T	C	downstream_gene_variant	MODIFIER				BOH78_0139	transcript	ONH77825	protein_coding	c.*109T>C	109	,C	downstream_gene_variant	MODIFIER	BOH78_0140	BOH78_0140	transcript	ONH77645	protein_coding	c.*7A>G	7	,C	intergenic_region	MODIFIER	BOH78_0139-BOH78_0140	BOH78_0139-BOH78_0140	intergenic_region	BOH78_0139-BOH78_0140	n.278828T>C
BOH78_Sc001	278829	T	C	downstream_gene_variant	MODIFIER				BOH78_0139	transcript	ONH77825	protein_coding	c.*110T>C	110	,C	downstream_gene_variant	MODIFIER	BOH78_0140	BOH78_0140	transcript	ONH77645	protein_coding	c.*6A>G	6	,C	intergenic_region	MODIFIER	BOH78_0139-BOH78_0140	BOH78_0139-BOH78_0140	intergenic_region	BOH78_0139-BOH78_0140	n.278829T>C
BOH78_Sc001	278788	C	G	downstream_gene_variant	MODIFIER				BOH78_0139	transcript	ONH77825	protein_coding	c.*69C>G	69	,G	downstream_gene_variant	MODIFIER	BOH78_0140	BOH78_0140	transcript	ONH77645	protein_coding	c.*47G>C	47	,G	intergenic_region	MODIFIER	BOH78_0139-BOH78_0140	BOH78_0139-BOH78_0140	intergenic_region	BOH78_0139-BOH78_0140	n.278788C>G
BOH78_Sc001	281214	G	A	downstream_gene_variant	MODIFIER				BOH78_0141	transcript	ONH77644	protein_coding	c.*14C>T	14	,A	intergenic_region	MODIFIER	BOH78_0140-BOH78_0141	BOH78_0140-BOH78_0141	intergenic_region	BOH78_0140-BOH78_0141	n.281214G>A
BOH78_Sc001	281148	G	A	downstream_gene_variant	MODIFIER				BOH78_0141	transcript	ONH77644	protein_coding	c.*80C>T	80	,A	intergenic_region	MODIFIER	BOH78_0140-BOH78_0141	BOH78_0140-BOH78_0141	intergenic_region	BOH78_0140-BOH78_0141	n.281148G>A
BOH78_Sc001	281185	T	C	downstream_gene_variant	MODIFIER				BOH78_0141	transcript	ONH77644	protein_coding	c.*43A>G	43	,C	intergenic_region	MODIFIER	BOH78_0140-BOH78_0141	BOH78_0140-BOH78_0141	intergenic_region	BOH78_0140-BOH78_0141	n.281185T>C
BOH78_Sc001	284766	G	C	downstream_gene_variant	MODIFIER				BOH78_0142	transcript	ONH77647	protein_coding	c.*238G>C	238	,C	intergenic_region	MODIFIER	BOH78_0142-BOH78_0143	BOH78_0142-BOH78_0143	intergenic_region	BOH78_0142-BOH78_0143	n.284766G>C
BOH78_Sc001	284606	A	T	downstream_gene_variant	MODIFIER				BOH78_0142	transcript	ONH77647	protein_coding	c.*78A>T	78	,T	intergenic_region	MODIFIER	BOH78_0142-BOH78_0143	BOH78_0142-BOH78_0143	intergenic_region	BOH78_0142-BOH78_0143	n.284606A>T
BOH78_Sc001	284801	C	T	downstream_gene_variant	MODIFIER				BOH78_0142	transcript	ONH77647	protein_coding	c.*273C>T	273	,T	intergenic_region	MODIFIER	BOH78_0142-BOH78_0143	BOH78_0142-BOH78_0143	intergenic_region	BOH78_0142-BOH78_0143	n.284801C>T
BOH78_Sc001	284972	T	C	downstream_gene_variant	MODIFIER				BOH78_0142	transcript	ONH77647	protein_coding	c.*444T>C	444	,C	intergenic_region	MODIFIER	BOH78_0142-BOH78_0143	BOH78_0142-BOH78_0143	intergenic_region	BOH78_0142-BOH78_0143	n.284972T>C
BOH78_Sc001	284749	T	A	downstream_gene_variant	MODIFIER				BOH78_0142	transcript	ONH77647	protein_coding	c.*221T>A	221	,A	intergenic_region	MODIFIER	BOH78_0142-BOH78_0143	BOH78_0142-BOH78_0143	intergenic_region	BOH78_0142-BOH78_0143	n.284749T>A
BOH78_Sc001	284752	G	A	downstream_gene_variant	MODIFIER				BOH78_0142	transcript	ONH77647	protein_coding	c.*224G>A	224	,A	intergenic_region	MODIFIER	BOH78_0142-BOH78_0143	BOH78_0142-BOH78_0143	intergenic_region	BOH78_0142-BOH78_0143	n.284752G>A
BOH78_Sc001	284747	T	C	downstream_gene_variant	MODIFIER				BOH78_0142	transcript	ONH77647	protein_coding	c.*219T>C	219	,C	intergenic_region	MODIFIER	BOH78_0142-BOH78_0143	BOH78_0142-BOH78_0143	intergenic_region	BOH78_0142-BOH78_0143	n.284747T>C
BOH78_Sc001	288188	A	C	downstream_gene_variant	MODIFIER				BOH78_0144	transcript	ONH77641	protein_coding	c.*485A>C	485	,C	downstream_gene_variant	MODIFIER	BOH78_0145	BOH78_0145	transcript	ONH77640	protein_coding	c.*48T>G	48	,C	intergenic_region	MODIFIER	BOH78_0144-BOH78_0145	BOH78_0144-BOH78_0145	intergenic_region	BOH78_0144-BOH78_0145	n.288188A>C
BOH78_Sc001	287856	T	C	downstream_gene_variant	MODIFIER				BOH78_0144	transcript	ONH77641	protein_coding	c.*153T>C	153	,C	downstream_gene_variant	MODIFIER	BOH78_0145	BOH78_0145	transcript	ONH77640	protein_coding	c.*380A>G	380	,C	intergenic_region	MODIFIER	BOH78_0144-BOH78_0145	BOH78_0144-BOH78_0145	intergenic_region	BOH78_0144-BOH78_0145	n.287856T>C
BOH78_Sc001	287764	G	A	downstream_gene_variant	MODIFIER				BOH78_0144	transcript	ONH77641	protein_coding	c.*61G>A	61	,A	downstream_gene_variant	MODIFIER	BOH78_0145	BOH78_0145	transcript	ONH77640	protein_coding	c.*472C>T	472	,A	intergenic_region	MODIFIER	BOH78_0144-BOH78_0145	BOH78_0144-BOH78_0145	intergenic_region	BOH78_0144-BOH78_0145	n.287764G>A
BOH78_Sc001	287789	T	G	downstream_gene_variant	MODIFIER				BOH78_0144	transcript	ONH77641	protein_coding	c.*86T>G	86	,G	downstream_gene_variant	MODIFIER	BOH78_0145	BOH78_0145	transcript	ONH77640	protein_coding	c.*447A>C	447	,G	intergenic_region	MODIFIER	BOH78_0144-BOH78_0145	BOH78_0144-BOH78_0145	intergenic_region	BOH78_0144-BOH78_0145	n.287789T>G
BOH78_Sc001	287890	T	C	downstream_gene_variant	MODIFIER				BOH78_0144	transcript	ONH77641	protein_coding	c.*187T>C	187	,C	downstream_gene_variant	MODIFIER	BOH78_0145	BOH78_0145	transcript	ONH77640	protein_coding	c.*346A>G	346	,C	intergenic_region	MODIFIER	BOH78_0144-BOH78_0145	BOH78_0144-BOH78_0145	intergenic_region	BOH78_0144-BOH78_0145	n.287890T>C
BOH78_Sc001	287902	G	A	downstream_gene_variant	MODIFIER				BOH78_0144	transcript	ONH77641	protein_coding	c.*199G>A	199	,A	downstream_gene_variant	MODIFIER	BOH78_0145	BOH78_0145	transcript	ONH77640	protein_coding	c.*334C>T	334	,A	intergenic_region	MODIFIER	BOH78_0144-BOH78_0145	BOH78_0144-BOH78_0145	intergenic_region	BOH78_0144-BOH78_0145	n.287902G>A
BOH78_Sc001	287852	G	A	downstream_gene_variant	MODIFIER				BOH78_0144	transcript	ONH77641	protein_coding	c.*149G>A	149	,A	downstream_gene_variant	MODIFIER	BOH78_0145	BOH78_0145	transcript	ONH77640	protein_coding	c.*384C>T	384	,A	intergenic_region	MODIFIER	BOH78_0144-BOH78_0145	BOH78_0144-BOH78_0145	intergenic_region	BOH78_0144-BOH78_0145	n.287852G>A
BOH78_Sc001	303148	A	C	downstream_gene_variant	MODIFIER				BOH78_0150	transcript	ONH77832	protein_coding	c.*125A>C	125	,C	intergenic_region	MODIFIER	BOH78_0150-BOH78_0151	BOH78_0150-BOH78_0151	intergenic_region	BOH78_0150-BOH78_0151	n.303148A>C
BOH78_Sc001	303159	A	G	downstream_gene_variant	MODIFIER				BOH78_0150	transcript	ONH77832	protein_coding	c.*136A>G	136	,G	intergenic_region	MODIFIER	BOH78_0150-BOH78_0151	BOH78_0150-BOH78_0151	intergenic_region	BOH78_0150-BOH78_0151	n.303159A>G
BOH78_Sc001	303119	G	A	downstream_gene_variant	MODIFIER				BOH78_0150	transcript	ONH77832	protein_coding	c.*96G>A	96	,A	intergenic_region	MODIFIER	BOH78_0150-BOH78_0151	BOH78_0150-BOH78_0151	intergenic_region	BOH78_0150-BOH78_0151	n.303119G>A
BOH78_Sc001	303305	T	C	downstream_gene_variant	MODIFIER				BOH78_0150	transcript	ONH77832	protein_coding	c.*282T>C	282	,C	intergenic_region	MODIFIER	BOH78_0150-BOH78_0151	BOH78_0150-BOH78_0151	intergenic_region	BOH78_0150-BOH78_0151	n.303305T>C
BOH78_Sc001	303467	T	G	downstream_gene_variant	MODIFIER				BOH78_0150	transcript	ONH77832	protein_coding	c.*444T>G	444	,G	intergenic_region	MODIFIER	BOH78_0150-BOH78_0151	BOH78_0150-BOH78_0151	intergenic_region	BOH78_0150-BOH78_0151	n.303467T>G
BOH78_Sc001	303114	G	A	downstream_gene_variant	MODIFIER				BOH78_0150	transcript	ONH77832	protein_coding	c.*91G>A	91	,A	intergenic_region	MODIFIER	BOH78_0150-BOH78_0151	BOH78_0150-BOH78_0151	intergenic_region	BOH78_0150-BOH78_0151	n.303114G>A
BOH78_Sc001	303157	T	C	downstream_gene_variant	MODIFIER				BOH78_0150	transcript	ONH77832	protein_coding	c.*134T>C	134	,C	intergenic_region	MODIFIER	BOH78_0150-BOH78_0151	BOH78_0150-BOH78_0151	intergenic_region	BOH78_0150-BOH78_0151	n.303157T>C
BOH78_Sc001	303410	T	A	downstream_gene_variant	MODIFIER				BOH78_0150	transcript	ONH77832	protein_coding	c.*387T>A	387	,A	intergenic_region	MODIFIER	BOH78_0150-BOH78_0151	BOH78_0150-BOH78_0151	intergenic_region	BOH78_0150-BOH78_0151	n.303410T>A
BOH78_Sc001	303427	C	T	downstream_gene_variant	MODIFIER				BOH78_0150	transcript	ONH77832	protein_coding	c.*404C>T	404	,T	intergenic_region	MODIFIER	BOH78_0150-BOH78_0151	BOH78_0150-BOH78_0151	intergenic_region	BOH78_0150-BOH78_0151	n.303427C>T
BOH78_Sc001	312957	A	C	downstream_gene_variant	MODIFIER				BOH78_0155	transcript	ONH77829	protein_coding	c.*309A>C	309	,C	downstream_gene_variant	MODIFIER	BOH78_0156	BOH78_0156	transcript	ONH77826	protein_coding	c.*452T>G	452	,C	intergenic_region	MODIFIER	BOH78_0155-BOH78_0156	BOH78_0155-BOH78_0156	intergenic_region	BOH78_0155-BOH78_0156	n.312957A>C
BOH78_Sc001	312670	T	G	downstream_gene_variant	MODIFIER				BOH78_0155	transcript	ONH77829	protein_coding	c.*22T>G	22	,G	intergenic_region	MODIFIER	BOH78_0155-BOH78_0156	BOH78_0155-BOH78_0156	intergenic_region	BOH78_0155-BOH78_0156	n.312670T>G
BOH78_Sc001	313028	C	T	downstream_gene_variant	MODIFIER				BOH78_0155	transcript	ONH77829	protein_coding	c.*380C>T	380	,T	downstream_gene_variant	MODIFIER	BOH78_0156	BOH78_0156	transcript	ONH77826	protein_coding	c.*381G>A	381	,T	intergenic_region	MODIFIER	BOH78_0155-BOH78_0156	BOH78_0155-BOH78_0156	intergenic_region	BOH78_0155-BOH78_0156	n.313028C>T
BOH78_Sc001	313092	C	T	downstream_gene_variant	MODIFIER				BOH78_0155	transcript	ONH77829	protein_coding	c.*444C>T	444	,T	downstream_gene_variant	MODIFIER	BOH78_0156	BOH78_0156	transcript	ONH77826	protein_coding	c.*317G>A	317	,T	intergenic_region	MODIFIER	BOH78_0155-BOH78_0156	BOH78_0155-BOH78_0156	intergenic_region	BOH78_0155-BOH78_0156	n.313092C>T
BOH78_Sc001	312710	C	T	downstream_gene_variant	MODIFIER				BOH78_0155	transcript	ONH77829	protein_coding	c.*62C>T	62	,T	intergenic_region	MODIFIER	BOH78_0155-BOH78_0156	BOH78_0155-BOH78_0156	intergenic_region	BOH78_0155-BOH78_0156	n.312710C>T
BOH78_Sc001	313036	T	C	downstream_gene_variant	MODIFIER				BOH78_0155	transcript	ONH77829	protein_coding	c.*388T>C	388	,C	downstream_gene_variant	MODIFIER	BOH78_0156	BOH78_0156	transcript	ONH77826	protein_coding	c.*373A>G	373	,C	intergenic_region	MODIFIER	BOH78_0155-BOH78_0156	BOH78_0155-BOH78_0156	intergenic_region	BOH78_0155-BOH78_0156	n.313036T>C
BOH78_Sc001	313310	C	T	downstream_gene_variant	MODIFIER				BOH78_0156	transcript	ONH77826	protein_coding	c.*99G>A	99	,T	intergenic_region	MODIFIER	BOH78_0155-BOH78_0156	BOH78_0155-BOH78_0156	intergenic_region	BOH78_0155-BOH78_0156	n.313310C>T
BOH78_Sc001	313333	G	A	downstream_gene_variant	MODIFIER				BOH78_0156	transcript	ONH77826	protein_coding	c.*76C>T	76	,A	intergenic_region	MODIFIER	BOH78_0155-BOH78_0156	BOH78_0155-BOH78_0156	intergenic_region	BOH78_0155-BOH78_0156	n.313333G>A
BOH78_Sc001	313259	C	A	downstream_gene_variant	MODIFIER				BOH78_0156	transcript	ONH77826	protein_coding	c.*150G>T	150	,A	intergenic_region	MODIFIER	BOH78_0155-BOH78_0156	BOH78_0155-BOH78_0156	intergenic_region	BOH78_0155-BOH78_0156	n.313259C>A
BOH78_Sc001	313278	G	A	downstream_gene_variant	MODIFIER				BOH78_0156	transcript	ONH77826	protein_coding	c.*131C>T	131	,A	intergenic_region	MODIFIER	BOH78_0155-BOH78_0156	BOH78_0155-BOH78_0156	intergenic_region	BOH78_0155-BOH78_0156	n.313278G>A
BOH78_Sc001	317647	G	T	downstream_gene_variant	MODIFIER				BOH78_0157	transcript	ONH77827	protein_coding	c.*108G>T	108	,T	downstream_gene_variant	MODIFIER	BOH78_0158	BOH78_0158	transcript	ONH77834	protein_coding	c.*41C>A	41	,T	intergenic_region	MODIFIER	BOH78_0157-BOH78_0158	BOH78_0157-BOH78_0158	intergenic_region	BOH78_0157-BOH78_0158	n.317647G>T
BOH78_Sc001	322686	T	A	downstream_gene_variant	MODIFIER				BOH78_0160	transcript	ONH77655	protein_coding	c.*428A>T	428	,A	intergenic_region	MODIFIER	BOH78_0159-BOH78_0160	BOH78_0159-BOH78_0160	intergenic_region	BOH78_0159-BOH78_0160	n.322686T>A
BOH78_Sc001	322704	C	A	downstream_gene_variant	MODIFIER				BOH78_0160	transcript	ONH77655	protein_coding	c.*410G>T	410	,A	intergenic_region	MODIFIER	BOH78_0159-BOH78_0160	BOH78_0159-BOH78_0160	intergenic_region	BOH78_0159-BOH78_0160	n.322704C>A
BOH78_Sc001	322727	C	T	downstream_gene_variant	MODIFIER				BOH78_0160	transcript	ONH77655	protein_coding	c.*387G>A	387	,T	intergenic_region	MODIFIER	BOH78_0159-BOH78_0160	BOH78_0159-BOH78_0160	intergenic_region	BOH78_0159-BOH78_0160	n.322727C>T
BOH78_Sc001	322875	G	A	downstream_gene_variant	MODIFIER				BOH78_0160	transcript	ONH77655	protein_coding	c.*239C>T	239	,A	intergenic_region	MODIFIER	BOH78_0159-BOH78_0160	BOH78_0159-BOH78_0160	intergenic_region	BOH78_0159-BOH78_0160	n.322875G>A
BOH78_Sc001	322762	T	C	downstream_gene_variant	MODIFIER				BOH78_0160	transcript	ONH77655	protein_coding	c.*352A>G	352	,C	intergenic_region	MODIFIER	BOH78_0159-BOH78_0160	BOH78_0159-BOH78_0160	intergenic_region	BOH78_0159-BOH78_0160	n.322762T>C
BOH78_Sc001	322829	C	T	downstream_gene_variant	MODIFIER				BOH78_0160	transcript	ONH77655	protein_coding	c.*285G>A	285	,T	intergenic_region	MODIFIER	BOH78_0159-BOH78_0160	BOH78_0159-BOH78_0160	intergenic_region	BOH78_0159-BOH78_0160	n.322829C>T
BOH78_Sc001	322803	G	C	downstream_gene_variant	MODIFIER				BOH78_0160	transcript	ONH77655	protein_coding	c.*311C>G	311	,C	intergenic_region	MODIFIER	BOH78_0159-BOH78_0160	BOH78_0159-BOH78_0160	intergenic_region	BOH78_0159-BOH78_0160	n.322803G>C
BOH78_Sc001	325308	C	T	downstream_gene_variant	MODIFIER				BOH78_0161	transcript	ONH77654	protein_coding	c.*221G>A	221	,T	intergenic_region	MODIFIER	BOH78_0160-BOH78_0161	BOH78_0160-BOH78_0161	intergenic_region	BOH78_0160-BOH78_0161	n.325308C>T
BOH78_Sc001	325448	C	T	downstream_gene_variant	MODIFIER				BOH78_0161	transcript	ONH77654	protein_coding	c.*81G>A	81	,T	intergenic_region	MODIFIER	BOH78_0160-BOH78_0161	BOH78_0160-BOH78_0161	intergenic_region	BOH78_0160-BOH78_0161	n.325448C>T
BOH78_Sc001	325527	T	C	downstream_gene_variant	MODIFIER				BOH78_0161	transcript	ONH77654	protein_coding	c.*2A>G	2	,C	intergenic_region	MODIFIER	BOH78_0160-BOH78_0161	BOH78_0160-BOH78_0161	intergenic_region	BOH78_0160-BOH78_0161	n.325527T>C
BOH78_Sc001	325354	C	T	downstream_gene_variant	MODIFIER				BOH78_0161	transcript	ONH77654	protein_coding	c.*175G>A	175	,T	intergenic_region	MODIFIER	BOH78_0160-BOH78_0161	BOH78_0160-BOH78_0161	intergenic_region	BOH78_0160-BOH78_0161	n.325354C>T
BOH78_Sc001	325358	G	C	downstream_gene_variant	MODIFIER				BOH78_0161	transcript	ONH77654	protein_coding	c.*171C>G	171	,C	intergenic_region	MODIFIER	BOH78_0160-BOH78_0161	BOH78_0160-BOH78_0161	intergenic_region	BOH78_0160-BOH78_0161	n.325358G>C
BOH78_Sc001	332834	T	G	downstream_gene_variant	MODIFIER				BOH78_0163	transcript	ONH77652	protein_coding	c.*122T>G	122	,G	downstream_gene_variant	MODIFIER	BOH78_0164	BOH78_0164	transcript	ONH77659	protein_coding	c.*191A>C	191	,G	intergenic_region	MODIFIER	BOH78_0163-BOH78_0164	BOH78_0163-BOH78_0164	intergenic_region	BOH78_0163-BOH78_0164	n.332834T>G
BOH78_Sc001	332714	T	G	downstream_gene_variant	MODIFIER				BOH78_0163	transcript	ONH77652	protein_coding	c.*2T>G	2	,G	downstream_gene_variant	MODIFIER	BOH78_0164	BOH78_0164	transcript	ONH77659	protein_coding	c.*311A>C	311	,G	intergenic_region	MODIFIER	BOH78_0163-BOH78_0164	BOH78_0163-BOH78_0164	intergenic_region	BOH78_0163-BOH78_0164	n.332714T>G
BOH78_Sc001	339500	G	T	downstream_gene_variant	MODIFIER				BOH78_0167	transcript	ONH77656	protein_coding	c.*393G>T	393	,T	intergenic_region	MODIFIER	BOH78_0167-BOH78_0168	BOH78_0167-BOH78_0168	intergenic_region	BOH78_0167-BOH78_0168	n.339500G>T
BOH78_Sc001	339568	C	T	downstream_gene_variant	MODIFIER				BOH78_0167	transcript	ONH77656	protein_coding	c.*461C>T	461	,T	intergenic_region	MODIFIER	BOH78_0167-BOH78_0168	BOH78_0167-BOH78_0168	intergenic_region	BOH78_0167-BOH78_0168	n.339568C>T
BOH78_Sc001	339121	C	T	downstream_gene_variant	MODIFIER				BOH78_0167	transcript	ONH77656	protein_coding	c.*14C>T	14	,T	intergenic_region	MODIFIER	BOH78_0167-BOH78_0168	BOH78_0167-BOH78_0168	intergenic_region	BOH78_0167-BOH78_0168	n.339121C>T
BOH78_Sc001	339472	C	T	downstream_gene_variant	MODIFIER				BOH78_0167	transcript	ONH77656	protein_coding	c.*365C>T	365	,T	intergenic_region	MODIFIER	BOH78_0167-BOH78_0168	BOH78_0167-BOH78_0168	intergenic_region	BOH78_0167-BOH78_0168	n.339472C>T
BOH78_Sc001	339458	T	G	downstream_gene_variant	MODIFIER				BOH78_0167	transcript	ONH77656	protein_coding	c.*351T>G	351	,G	intergenic_region	MODIFIER	BOH78_0167-BOH78_0168	BOH78_0167-BOH78_0168	intergenic_region	BOH78_0167-BOH78_0168	n.339458T>G
BOH78_Sc001	339537	C	T	downstream_gene_variant	MODIFIER				BOH78_0167	transcript	ONH77656	protein_coding	c.*430C>T	430	,T	intergenic_region	MODIFIER	BOH78_0167-BOH78_0168	BOH78_0167-BOH78_0168	intergenic_region	BOH78_0167-BOH78_0168	n.339537C>T
BOH78_Sc001	339312	A	G	downstream_gene_variant	MODIFIER				BOH78_0167	transcript	ONH77656	protein_coding	c.*205A>G	205	,G	intergenic_region	MODIFIER	BOH78_0167-BOH78_0168	BOH78_0167-BOH78_0168	intergenic_region	BOH78_0167-BOH78_0168	n.339312A>G
BOH78_Sc001	342762	T	G	downstream_gene_variant	MODIFIER				BOH78_0169	transcript	ONH77650	protein_coding	c.*418T>G	418	,G	intergenic_region	MODIFIER	BOH78_0169-BOH78_0170	BOH78_0169-BOH78_0170	intergenic_region	BOH78_0169-BOH78_0170	n.342762T>G
BOH78_Sc001	342560	T	C	downstream_gene_variant	MODIFIER				BOH78_0169	transcript	ONH77650	protein_coding	c.*216T>C	216	,C	intergenic_region	MODIFIER	BOH78_0169-BOH78_0170	BOH78_0169-BOH78_0170	intergenic_region	BOH78_0169-BOH78_0170	n.342560T>C
BOH78_Sc001	342610	G	T	downstream_gene_variant	MODIFIER				BOH78_0169	transcript	ONH77650	protein_coding	c.*266G>T	266	,T	intergenic_region	MODIFIER	BOH78_0169-BOH78_0170	BOH78_0169-BOH78_0170	intergenic_region	BOH78_0169-BOH78_0170	n.342610G>T
BOH78_Sc001	342763	A	G	downstream_gene_variant	MODIFIER				BOH78_0169	transcript	ONH77650	protein_coding	c.*419A>G	419	,G	intergenic_region	MODIFIER	BOH78_0169-BOH78_0170	BOH78_0169-BOH78_0170	intergenic_region	BOH78_0169-BOH78_0170	n.342763A>G
BOH78_Sc001	342700	T	C	downstream_gene_variant	MODIFIER				BOH78_0169	transcript	ONH77650	protein_coding	c.*356T>C	356	,C	intergenic_region	MODIFIER	BOH78_0169-BOH78_0170	BOH78_0169-BOH78_0170	intergenic_region	BOH78_0169-BOH78_0170	n.342700T>C
BOH78_Sc001	342482	C	T	downstream_gene_variant	MODIFIER				BOH78_0169	transcript	ONH77650	protein_coding	c.*138C>T	138	,T	intergenic_region	MODIFIER	BOH78_0169-BOH78_0170	BOH78_0169-BOH78_0170	intergenic_region	BOH78_0169-BOH78_0170	n.342482C>T
BOH78_Sc001	343822	G	A	downstream_gene_variant	MODIFIER				BOH78_0170	transcript	ONH77842	protein_coding	c.*100G>A	100	,A	intergenic_region	MODIFIER	BOH78_0170-BOH78_0171	BOH78_0170-BOH78_0171	intergenic_region	BOH78_0170-BOH78_0171	n.343822G>A
BOH78_Sc001	343728	A	G	downstream_gene_variant	MODIFIER				BOH78_0170	transcript	ONH77842	protein_coding	c.*6A>G	6	,G	intergenic_region	MODIFIER	BOH78_0170-BOH78_0171	BOH78_0170-BOH78_0171	intergenic_region	BOH78_0170-BOH78_0171	n.343728A>G
BOH78_Sc001	343816	A	G	downstream_gene_variant	MODIFIER				BOH78_0170	transcript	ONH77842	protein_coding	c.*94A>G	94	,G	intergenic_region	MODIFIER	BOH78_0170-BOH78_0171	BOH78_0170-BOH78_0171	intergenic_region	BOH78_0170-BOH78_0171	n.343816A>G
BOH78_Sc001	343834	G	T	downstream_gene_variant	MODIFIER				BOH78_0170	transcript	ONH77842	protein_coding	c.*112G>T	112	,T	intergenic_region	MODIFIER	BOH78_0170-BOH78_0171	BOH78_0170-BOH78_0171	intergenic_region	BOH78_0170-BOH78_0171	n.343834G>T
BOH78_Sc001	343997	C	A	downstream_gene_variant	MODIFIER				BOH78_0170	transcript	ONH77842	protein_coding	c.*275C>A	275	,A	intergenic_region	MODIFIER	BOH78_0170-BOH78_0171	BOH78_0170-BOH78_0171	intergenic_region	BOH78_0170-BOH78_0171	n.343997C>A
BOH78_Sc001	348651	G	A	downstream_gene_variant	MODIFIER				BOH78_0173	transcript	ONH77845	protein_coding	c.*67G>A	67	,A	downstream_gene_variant	MODIFIER	BOH78_0174	BOH78_0174	transcript	ONH77838	protein_coding	c.*68C>T	68	,A	intergenic_region	MODIFIER	BOH78_0173-BOH78_0174	BOH78_0173-BOH78_0174	intergenic_region	BOH78_0173-BOH78_0174	n.348651G>A
BOH78_Sc001	355554	G	A	downstream_gene_variant	MODIFIER				BOH78_0178	transcript	ONH77836	protein_coding	c.*494G>A	494	,A	intergenic_region	MODIFIER	BOH78_0178-BOH78_0179	BOH78_0178-BOH78_0179	intergenic_region	BOH78_0178-BOH78_0179	n.355554G>A
BOH78_Sc001	355066	A	C	downstream_gene_variant	MODIFIER				BOH78_0178	transcript	ONH77836	protein_coding	c.*6A>C	6	,C	intergenic_region	MODIFIER	BOH78_0178-BOH78_0179	BOH78_0178-BOH78_0179	intergenic_region	BOH78_0178-BOH78_0179	n.355066A>C
BOH78_Sc001	356972	G	A	downstream_gene_variant	MODIFIER				BOH78_0179	transcript	ONH77837	protein_coding	c.*435G>A	435	,A	intergenic_region	MODIFIER	BOH78_0179-BOH78_0180	BOH78_0179-BOH78_0180	intergenic_region	BOH78_0179-BOH78_0180	n.356972G>A
BOH78_Sc001	356990	C	T	downstream_gene_variant	MODIFIER				BOH78_0179	transcript	ONH77837	protein_coding	c.*453C>T	453	,T	intergenic_region	MODIFIER	BOH78_0179-BOH78_0180	BOH78_0179-BOH78_0180	intergenic_region	BOH78_0179-BOH78_0180	n.356990C>T
BOH78_Sc001	356804	C	T	downstream_gene_variant	MODIFIER				BOH78_0179	transcript	ONH77837	protein_coding	c.*267C>T	267	,T	intergenic_region	MODIFIER	BOH78_0179-BOH78_0180	BOH78_0179-BOH78_0180	intergenic_region	BOH78_0179-BOH78_0180	n.356804C>T
BOH78_Sc001	366099	C	T	downstream_gene_variant	MODIFIER				BOH78_0180	transcript	ONH77665	protein_coding	c.*189C>T	189	,T	downstream_gene_variant	MODIFIER	BOH78_0181	BOH78_0181	transcript	ONH77664	protein_coding	c.*17G>A	17	,T	intergenic_region	MODIFIER	BOH78_0180-BOH78_0181	BOH78_0180-BOH78_0181	intergenic_region	BOH78_0180-BOH78_0181	n.366099C>T
BOH78_Sc001	371305	T	C	downstream_gene_variant	MODIFIER				BOH78_0182	transcript	ONH77667	protein_coding	c.*129T>C	129	,C	intergenic_region	MODIFIER	BOH78_0182-BOH78_0183	BOH78_0182-BOH78_0183	intergenic_region	BOH78_0182-BOH78_0183	n.371305T>C
BOH78_Sc001	377493	G	C	downstream_gene_variant	MODIFIER				BOH78_0184	transcript	ONH77669	protein_coding	c.*117G>C	117	,C	intergenic_region	MODIFIER	BOH78_0184-BOH78_0185	BOH78_0184-BOH78_0185	intergenic_region	BOH78_0184-BOH78_0185	n.377493G>C
BOH78_Sc001	377604	A	G	downstream_gene_variant	MODIFIER				BOH78_0184	transcript	ONH77669	protein_coding	c.*228A>G	228	,G	intergenic_region	MODIFIER	BOH78_0184-BOH78_0185	BOH78_0184-BOH78_0185	intergenic_region	BOH78_0184-BOH78_0185	n.377604A>G
BOH78_Sc001	383290	A	G	downstream_gene_variant	MODIFIER				BOH78_0187	transcript	ONH77670	protein_coding	c.*10T>C	10	,G	intergenic_region	MODIFIER	BOH78_0186-BOH78_0187	BOH78_0186-BOH78_0187	intergenic_region	BOH78_0186-BOH78_0187	n.383290A>G
BOH78_Sc001	383090	T	C	downstream_gene_variant	MODIFIER				BOH78_0187	transcript	ONH77670	protein_coding	c.*210A>G	210	,C	intergenic_region	MODIFIER	BOH78_0186-BOH78_0187	BOH78_0186-BOH78_0187	intergenic_region	BOH78_0186-BOH78_0187	n.383090T>C
BOH78_Sc001	383214	A	G	downstream_gene_variant	MODIFIER				BOH78_0187	transcript	ONH77670	protein_coding	c.*86T>C	86	,G	intergenic_region	MODIFIER	BOH78_0186-BOH78_0187	BOH78_0186-BOH78_0187	intergenic_region	BOH78_0186-BOH78_0187	n.383214A>G
BOH78_Sc001	383096	C	T	downstream_gene_variant	MODIFIER				BOH78_0187	transcript	ONH77670	protein_coding	c.*204G>A	204	,T	intergenic_region	MODIFIER	BOH78_0186-BOH78_0187	BOH78_0186-BOH78_0187	intergenic_region	BOH78_0186-BOH78_0187	n.383096C>T
BOH78_Sc001	383080	G	A	downstream_gene_variant	MODIFIER				BOH78_0187	transcript	ONH77670	protein_coding	c.*220C>T	220	,A	intergenic_region	MODIFIER	BOH78_0186-BOH78_0187	BOH78_0186-BOH78_0187	intergenic_region	BOH78_0186-BOH78_0187	n.383080G>A
BOH78_Sc001	390441	T	C	downstream_gene_variant	MODIFIER				BOH78_0188	transcript	ONH77673	protein_coding	c.*135T>C	135	,C	intergenic_region	MODIFIER	BOH78_0188-BOH78_0189	BOH78_0188-BOH78_0189	intergenic_region	BOH78_0188-BOH78_0189	n.390441T>C
BOH78_Sc001	390741	A	G	downstream_gene_variant	MODIFIER				BOH78_0188	transcript	ONH77673	protein_coding	c.*435A>G	435	,G	intergenic_region	MODIFIER	BOH78_0188-BOH78_0189	BOH78_0188-BOH78_0189	intergenic_region	BOH78_0188-BOH78_0189	n.390741A>G
BOH78_Sc001	395849	A	T	downstream_gene_variant	MODIFIER				BOH78_0191	transcript	ONH77849	protein_coding	c.*115A>T	115	,T	downstream_gene_variant	MODIFIER	BOH78_0192	BOH78_0192	transcript	ONH77846	protein_coding	c.*30T>A	30	,T	intergenic_region	MODIFIER	BOH78_0191-BOH78_0192	BOH78_0191-BOH78_0192	intergenic_region	BOH78_0191-BOH78_0192	n.395849A>T
BOH78_Sc001	395812	C	T	downstream_gene_variant	MODIFIER				BOH78_0191	transcript	ONH77849	protein_coding	c.*78C>T	78	,T	downstream_gene_variant	MODIFIER	BOH78_0192	BOH78_0192	transcript	ONH77846	protein_coding	c.*67G>A	67	,T	intergenic_region	MODIFIER	BOH78_0191-BOH78_0192	BOH78_0191-BOH78_0192	intergenic_region	BOH78_0191-BOH78_0192	n.395812C>T
BOH78_Sc001	398190	T	C	downstream_gene_variant	MODIFIER				BOH78_0193	transcript	ONH77847	protein_coding	c.*27T>C	27	,C	downstream_gene_variant	MODIFIER	BOH78_0194	BOH78_0194	transcript	ONH77852	protein_coding	c.*106A>G	106	,C	intergenic_region	MODIFIER	BOH78_0193-BOH78_0194	BOH78_0193-BOH78_0194	intergenic_region	BOH78_0193-BOH78_0194	n.398190T>C
BOH78_Sc001	398243	A	G	downstream_gene_variant	MODIFIER				BOH78_0193	transcript	ONH77847	protein_coding	c.*80A>G	80	,G	downstream_gene_variant	MODIFIER	BOH78_0194	BOH78_0194	transcript	ONH77852	protein_coding	c.*53T>C	53	,G	intergenic_region	MODIFIER	BOH78_0193-BOH78_0194	BOH78_0193-BOH78_0194	intergenic_region	BOH78_0193-BOH78_0194	n.398243A>G
BOH78_Sc001	398247	A	G	downstream_gene_variant	MODIFIER				BOH78_0193	transcript	ONH77847	protein_coding	c.*84A>G	84	,G	downstream_gene_variant	MODIFIER	BOH78_0194	BOH78_0194	transcript	ONH77852	protein_coding	c.*49T>C	49	,G	intergenic_region	MODIFIER	BOH78_0193-BOH78_0194	BOH78_0193-BOH78_0194	intergenic_region	BOH78_0193-BOH78_0194	n.398247A>G
BOH78_Sc001	398220	A	G	downstream_gene_variant	MODIFIER				BOH78_0193	transcript	ONH77847	protein_coding	c.*57A>G	57	,G	downstream_gene_variant	MODIFIER	BOH78_0194	BOH78_0194	transcript	ONH77852	protein_coding	c.*76T>C	76	,G	intergenic_region	MODIFIER	BOH78_0193-BOH78_0194	BOH78_0193-BOH78_0194	intergenic_region	BOH78_0193-BOH78_0194	n.398220A>G
BOH78_Sc001	399828	T	A	downstream_gene_variant	MODIFIER				BOH78_0195	transcript	ONH77853	protein_coding	c.*261A>T	261	,A	intergenic_region	MODIFIER	BOH78_0194-BOH78_0195	BOH78_0194-BOH78_0195	intergenic_region	BOH78_0194-BOH78_0195	n.399828T>A
BOH78_Sc001	399824	G	A	downstream_gene_variant	MODIFIER				BOH78_0195	transcript	ONH77853	protein_coding	c.*265C>T	265	,A	intergenic_region	MODIFIER	BOH78_0194-BOH78_0195	BOH78_0194-BOH78_0195	intergenic_region	BOH78_0194-BOH78_0195	n.399824G>A
BOH78_Sc001	399809	T	G	downstream_gene_variant	MODIFIER				BOH78_0195	transcript	ONH77853	protein_coding	c.*280A>C	280	,G	intergenic_region	MODIFIER	BOH78_0194-BOH78_0195	BOH78_0194-BOH78_0195	intergenic_region	BOH78_0194-BOH78_0195	n.399809T>G
BOH78_Sc001	399678	C	T	downstream_gene_variant	MODIFIER				BOH78_0195	transcript	ONH77853	protein_coding	c.*411G>A	411	,T	intergenic_region	MODIFIER	BOH78_0194-BOH78_0195	BOH78_0194-BOH78_0195	intergenic_region	BOH78_0194-BOH78_0195	n.399678C>T
BOH78_Sc001	400040	G	T	downstream_gene_variant	MODIFIER				BOH78_0195	transcript	ONH77853	protein_coding	c.*49C>A	49	,T	intergenic_region	MODIFIER	BOH78_0194-BOH78_0195	BOH78_0194-BOH78_0195	intergenic_region	BOH78_0194-BOH78_0195	n.400040G>T
BOH78_Sc001	399964	G	A	downstream_gene_variant	MODIFIER				BOH78_0195	transcript	ONH77853	protein_coding	c.*125C>T	125	,A	intergenic_region	MODIFIER	BOH78_0194-BOH78_0195	BOH78_0194-BOH78_0195	intergenic_region	BOH78_0194-BOH78_0195	n.399964G>A
BOH78_Sc001	400071	G	A	downstream_gene_variant	MODIFIER				BOH78_0195	transcript	ONH77853	protein_coding	c.*18C>T	18	,A	intergenic_region	MODIFIER	BOH78_0194-BOH78_0195	BOH78_0194-BOH78_0195	intergenic_region	BOH78_0194-BOH78_0195	n.400071G>A
BOH78_Sc001	428895	G	A	downstream_gene_variant	MODIFIER				BOH78_0204	transcript	ONH77872	protein_coding	c.*210C>T	210	WARNING_TRANSCRIPT_NO_START_CODON,A	intergenic_region	MODIFIER	BOH78_0203-BOH78_0204	BOH78_0203-BOH78_0204	intergenic_region	BOH78_0203-BOH78_0204	n.428895G>A
BOH78_Sc001	429078	G	A	downstream_gene_variant	MODIFIER				BOH78_0204	transcript	ONH77872	protein_coding	c.*27C>T	27	WARNING_TRANSCRIPT_NO_START_CODON,A	intergenic_region	MODIFIER	BOH78_0203-BOH78_0204	BOH78_0203-BOH78_0204	intergenic_region	BOH78_0203-BOH78_0204	n.429078G>A
BOH78_Sc001	428717	T	A	downstream_gene_variant	MODIFIER				BOH78_0204	transcript	ONH77872	protein_coding	c.*388A>T	388	WARNING_TRANSCRIPT_NO_START_CODON,A	intergenic_region	MODIFIER	BOH78_0203-BOH78_0204	BOH78_0203-BOH78_0204	intergenic_region	BOH78_0203-BOH78_0204	n.428717T>A
BOH78_Sc001	429033	G	A	downstream_gene_variant	MODIFIER				BOH78_0204	transcript	ONH77872	protein_coding	c.*72C>T	72	WARNING_TRANSCRIPT_NO_START_CODON,A	intergenic_region	MODIFIER	BOH78_0203-BOH78_0204	BOH78_0203-BOH78_0204	intergenic_region	BOH78_0203-BOH78_0204	n.429033G>A
BOH78_Sc001	429096	T	A	downstream_gene_variant	MODIFIER				BOH78_0204	transcript	ONH77872	protein_coding	c.*9A>T	9	WARNING_TRANSCRIPT_NO_START_CODON,A	intergenic_region	MODIFIER	BOH78_0203-BOH78_0204	BOH78_0203-BOH78_0204	intergenic_region	BOH78_0203-BOH78_0204	n.429096T>A
BOH78_Sc001	428660	T	C	downstream_gene_variant	MODIFIER				BOH78_0204	transcript	ONH77872	protein_coding	c.*445A>G	445	WARNING_TRANSCRIPT_NO_START_CODON,C	intergenic_region	MODIFIER	BOH78_0203-BOH78_0204	BOH78_0203-BOH78_0204	intergenic_region	BOH78_0203-BOH78_0204	n.428660T>C
BOH78_Sc001	428908	A	T	downstream_gene_variant	MODIFIER				BOH78_0204	transcript	ONH77872	protein_coding	c.*197T>A	197	WARNING_TRANSCRIPT_NO_START_CODON,T	intergenic_region	MODIFIER	BOH78_0203-BOH78_0204	BOH78_0203-BOH78_0204	intergenic_region	BOH78_0203-BOH78_0204	n.428908A>T
BOH78_Sc001	428858	C	T	downstream_gene_variant	MODIFIER				BOH78_0204	transcript	ONH77872	protein_coding	c.*247G>A	247	WARNING_TRANSCRIPT_NO_START_CODON,T	intergenic_region	MODIFIER	BOH78_0203-BOH78_0204	BOH78_0203-BOH78_0204	intergenic_region	BOH78_0203-BOH78_0204	n.428858C>T
BOH78_Sc001	428729	A	T	downstream_gene_variant	MODIFIER				BOH78_0204	transcript	ONH77872	protein_coding	c.*376T>A	376	WARNING_TRANSCRIPT_NO_START_CODON,T	intergenic_region	MODIFIER	BOH78_0203-BOH78_0204	BOH78_0203-BOH78_0204	intergenic_region	BOH78_0203-BOH78_0204	n.428729A>T
BOH78_Sc001	432233	G	A	downstream_gene_variant	MODIFIER				BOH78_0205	transcript	ONH77873	protein_coding	c.*143G>A	89	,A	intergenic_region	MODIFIER	BOH78_0205-BOH78_0206	BOH78_0205-BOH78_0206	intergenic_region	BOH78_0205-BOH78_0206	n.432233G>A
BOH78_Sc001	432376	T	A	downstream_gene_variant	MODIFIER				BOH78_0205	transcript	ONH77873	protein_coding	c.*286T>A	232	,A	intergenic_region	MODIFIER	BOH78_0205-BOH78_0206	BOH78_0205-BOH78_0206	intergenic_region	BOH78_0205-BOH78_0206	n.432376T>A
BOH78_Sc001	432160	A	G	downstream_gene_variant	MODIFIER				BOH78_0205	transcript	ONH77873	protein_coding	c.*70A>G	16	,G	intergenic_region	MODIFIER	BOH78_0205-BOH78_0206	BOH78_0205-BOH78_0206	intergenic_region	BOH78_0205-BOH78_0206	n.432160A>G
BOH78_Sc001	432579	C	T	downstream_gene_variant	MODIFIER				BOH78_0205	transcript	ONH77873	protein_coding	c.*489C>T	435	,T	intergenic_region	MODIFIER	BOH78_0205-BOH78_0206	BOH78_0205-BOH78_0206	intergenic_region	BOH78_0205-BOH78_0206	n.432579C>T
BOH78_Sc001	435891	G	A	downstream_gene_variant	MODIFIER				BOH78_0206	transcript	ONH77870	protein_coding	c.*126G>A	126	,A	downstream_gene_variant	MODIFIER	BOH78_0207	BOH78_0207	transcript	ONH77871	protein_coding	c.*23C>T	23	,A	intergenic_region	MODIFIER	BOH78_0206-BOH78_0207	BOH78_0206-BOH78_0207	intergenic_region	BOH78_0206-BOH78_0207	n.435891G>A
BOH78_Sc001	437620	G	A	downstream_gene_variant	MODIFIER				BOH78_0208	transcript	ONH77874	protein_coding	c.*39G>A	39	,A	downstream_gene_variant	MODIFIER	BOH78_0209	BOH78_0209	transcript	ONH77875	protein_coding	c.*239C>T	239	,A	intergenic_region	MODIFIER	BOH78_0208-BOH78_0209	BOH78_0208-BOH78_0209	intergenic_region	BOH78_0208-BOH78_0209	n.437620G>A
BOH78_Sc001	437687	T	G	downstream_gene_variant	MODIFIER				BOH78_0208	transcript	ONH77874	protein_coding	c.*106T>G	106	,G	downstream_gene_variant	MODIFIER	BOH78_0209	BOH78_0209	transcript	ONH77875	protein_coding	c.*172A>C	172	,G	intergenic_region	MODIFIER	BOH78_0208-BOH78_0209	BOH78_0208-BOH78_0209	intergenic_region	BOH78_0208-BOH78_0209	n.437687T>G
BOH78_Sc001	437596	C	T	downstream_gene_variant	MODIFIER				BOH78_0208	transcript	ONH77874	protein_coding	c.*15C>T	15	,T	downstream_gene_variant	MODIFIER	BOH78_0209	BOH78_0209	transcript	ONH77875	protein_coding	c.*263G>A	263	,T	intergenic_region	MODIFIER	BOH78_0208-BOH78_0209	BOH78_0208-BOH78_0209	intergenic_region	BOH78_0208-BOH78_0209	n.437596C>T
BOH78_Sc001	445438	A	T	downstream_gene_variant	MODIFIER				BOH78_0213	transcript	ONH77676	protein_coding	c.*163A>T	163	,T	downstream_gene_variant	MODIFIER	BOH78_0214	BOH78_0214	transcript	ONH77679	protein_coding	c.*13T>A	13	,T	intergenic_region	MODIFIER	BOH78_0213-BOH78_0214	BOH78_0213-BOH78_0214	intergenic_region	BOH78_0213-BOH78_0214	n.445438A>T
BOH78_Sc001	473220	T	A	downstream_gene_variant	MODIFIER				BOH78_0227	transcript	ONH77724	protein_coding	c.*9A>T	9	,A	intergenic_region	MODIFIER	BOH78_0226-BOH78_0227	BOH78_0226-BOH78_0227	intergenic_region	BOH78_0226-BOH78_0227	n.473220T>A
BOH78_Sc001	473153	A	C	downstream_gene_variant	MODIFIER				BOH78_0227	transcript	ONH77724	protein_coding	c.*76T>G	76	,C	intergenic_region	MODIFIER	BOH78_0226-BOH78_0227	BOH78_0226-BOH78_0227	intergenic_region	BOH78_0226-BOH78_0227	n.473153A>C
BOH78_Sc001	478755	C	T	downstream_gene_variant	MODIFIER				BOH78_0228	transcript	ONH77721	protein_coding	c.*142C>T	142	,T	downstream_gene_variant	MODIFIER	BOH78_0229	BOH78_0229	transcript	ONH77722	protein_coding	c.*42G>A	42	,T	intergenic_region	MODIFIER	BOH78_0228-BOH78_0229	BOH78_0228-BOH78_0229	intergenic_region	BOH78_0228-BOH78_0229	n.478755C>T
BOH78_Sc001	482624	G	A	downstream_gene_variant	MODIFIER				BOH78_0230	transcript	ONH77701	protein_coding	c.*124G>A	124	,A	intergenic_region	MODIFIER	BOH78_0230-BOH78_0231	BOH78_0230-BOH78_0231	intergenic_region	BOH78_0230-BOH78_0231	n.482624G>A
BOH78_Sc001	482864	G	C	downstream_gene_variant	MODIFIER				BOH78_0230	transcript	ONH77701	protein_coding	c.*364G>C	364	,C	intergenic_region	MODIFIER	BOH78_0230-BOH78_0231	BOH78_0230-BOH78_0231	intergenic_region	BOH78_0230-BOH78_0231	n.482864G>C
BOH78_Sc001	482590	A	G	downstream_gene_variant	MODIFIER				BOH78_0230	transcript	ONH77701	protein_coding	c.*90A>G	90	,G	intergenic_region	MODIFIER	BOH78_0230-BOH78_0231	BOH78_0230-BOH78_0231	intergenic_region	BOH78_0230-BOH78_0231	n.482590A>G
BOH78_Sc001	483661	T	C	downstream_gene_variant	MODIFIER				BOH78_0231	transcript	ONH77700	protein_coding	c.*308A>G	308	,C	intergenic_region	MODIFIER	BOH78_0230-BOH78_0231	BOH78_0230-BOH78_0231	intergenic_region	BOH78_0230-BOH78_0231	n.483661T>C
BOH78_Sc001	483511	T	C	downstream_gene_variant	MODIFIER				BOH78_0231	transcript	ONH77700	protein_coding	c.*458A>G	458	,C	intergenic_region	MODIFIER	BOH78_0230-BOH78_0231	BOH78_0230-BOH78_0231	intergenic_region	BOH78_0230-BOH78_0231	n.483511T>C
BOH78_Sc001	483542	C	G	downstream_gene_variant	MODIFIER				BOH78_0231	transcript	ONH77700	protein_coding	c.*427G>C	427	,G	intergenic_region	MODIFIER	BOH78_0230-BOH78_0231	BOH78_0230-BOH78_0231	intergenic_region	BOH78_0230-BOH78_0231	n.483542C>G
BOH78_Sc001	483505	T	G	downstream_gene_variant	MODIFIER				BOH78_0231	transcript	ONH77700	protein_coding	c.*464A>C	464	,G	intergenic_region	MODIFIER	BOH78_0230-BOH78_0231	BOH78_0230-BOH78_0231	intergenic_region	BOH78_0230-BOH78_0231	n.483505T>G
BOH78_Sc001	483666	C	T	downstream_gene_variant	MODIFIER				BOH78_0231	transcript	ONH77700	protein_coding	c.*303G>A	303	,T	intergenic_region	MODIFIER	BOH78_0230-BOH78_0231	BOH78_0230-BOH78_0231	intergenic_region	BOH78_0230-BOH78_0231	n.483666C>T
BOH78_Sc001	483603	C	T	downstream_gene_variant	MODIFIER				BOH78_0231	transcript	ONH77700	protein_coding	c.*366G>A	366	,T	intergenic_region	MODIFIER	BOH78_0230-BOH78_0231	BOH78_0230-BOH78_0231	intergenic_region	BOH78_0230-BOH78_0231	n.483603C>T
BOH78_Sc001	494526	A	G	downstream_gene_variant	MODIFIER				BOH78_0237	transcript	ONH77694	protein_coding	c.*19T>C	19	,G	intergenic_region	MODIFIER	BOH78_0236-BOH78_0237	BOH78_0236-BOH78_0237	intergenic_region	BOH78_0236-BOH78_0237	n.494526A>G
BOH78_Sc001	496524	C	T	downstream_gene_variant	MODIFIER				BOH78_0238	transcript	ONH77703	protein_coding	c.*82G>A	82	,T	intergenic_region	MODIFIER	BOH78_0237-BOH78_0238	BOH78_0237-BOH78_0238	intergenic_region	BOH78_0237-BOH78_0238	n.496524C>T
BOH78_Sc001	503732	T	G	downstream_gene_variant	MODIFIER				BOH78_0241	transcript	ONH77911	protein_coding	c.*93T>G	93	,G	intergenic_region	MODIFIER	BOH78_0241-BOH78_0242	BOH78_0241-BOH78_0242	intergenic_region	BOH78_0241-BOH78_0242	n.503732T>G
BOH78_Sc001	503774	A	T	downstream_gene_variant	MODIFIER				BOH78_0241	transcript	ONH77911	protein_coding	c.*135A>T	135	,T	intergenic_region	MODIFIER	BOH78_0241-BOH78_0242	BOH78_0241-BOH78_0242	intergenic_region	BOH78_0241-BOH78_0242	n.503774A>T
BOH78_Sc001	503711	C	T	downstream_gene_variant	MODIFIER				BOH78_0241	transcript	ONH77911	protein_coding	c.*72C>T	72	,T	intergenic_region	MODIFIER	BOH78_0241-BOH78_0242	BOH78_0241-BOH78_0242	intergenic_region	BOH78_0241-BOH78_0242	n.503711C>T
BOH78_Sc001	505798	T	C	downstream_gene_variant	MODIFIER				BOH78_0242	transcript	ONH77908	protein_coding	c.*179T>C	179	,C	downstream_gene_variant	MODIFIER	BOH78_0243	BOH78_0243	transcript	ONH77909	protein_coding	c.*19A>G	19	,C	intergenic_region	MODIFIER	BOH78_0242-BOH78_0243	BOH78_0242-BOH78_0243	intergenic_region	BOH78_0242-BOH78_0243	n.505798T>C
BOH78_Sc001	505780	C	T	downstream_gene_variant	MODIFIER				BOH78_0242	transcript	ONH77908	protein_coding	c.*161C>T	161	,T	downstream_gene_variant	MODIFIER	BOH78_0243	BOH78_0243	transcript	ONH77909	protein_coding	c.*37G>A	37	,T	intergenic_region	MODIFIER	BOH78_0242-BOH78_0243	BOH78_0242-BOH78_0243	intergenic_region	BOH78_0242-BOH78_0243	n.505780C>T
BOH78_Sc001	505746	C	A	downstream_gene_variant	MODIFIER				BOH78_0242	transcript	ONH77908	protein_coding	c.*127C>A	127	,A	downstream_gene_variant	MODIFIER	BOH78_0243	BOH78_0243	transcript	ONH77909	protein_coding	c.*71G>T	71	,A	intergenic_region	MODIFIER	BOH78_0242-BOH78_0243	BOH78_0242-BOH78_0243	intergenic_region	BOH78_0242-BOH78_0243	n.505746C>A
BOH78_Sc001	509734	T	C	downstream_gene_variant	MODIFIER				BOH78_0245	transcript	ONH77907	protein_coding	c.*90T>C	90	,C	downstream_gene_variant	MODIFIER	BOH78_0246	BOH78_0246	transcript	ONH77904	protein_coding	c.*181A>G	181	,C	intergenic_region	MODIFIER	BOH78_0245-BOH78_0246	BOH78_0245-BOH78_0246	intergenic_region	BOH78_0245-BOH78_0246	n.509734T>C
BOH78_Sc001	509878	A	T	downstream_gene_variant	MODIFIER				BOH78_0245	transcript	ONH77907	protein_coding	c.*234A>T	234	,T	downstream_gene_variant	MODIFIER	BOH78_0246	BOH78_0246	transcript	ONH77904	protein_coding	c.*37T>A	37	,T	intergenic_region	MODIFIER	BOH78_0245-BOH78_0246	BOH78_0245-BOH78_0246	intergenic_region	BOH78_0245-BOH78_0246	n.509878A>T
BOH78_Sc001	509879	G	T	downstream_gene_variant	MODIFIER				BOH78_0245	transcript	ONH77907	protein_coding	c.*235G>T	235	,T	downstream_gene_variant	MODIFIER	BOH78_0246	BOH78_0246	transcript	ONH77904	protein_coding	c.*36C>A	36	,T	intergenic_region	MODIFIER	BOH78_0245-BOH78_0246	BOH78_0245-BOH78_0246	intergenic_region	BOH78_0245-BOH78_0246	n.509879G>T
BOH78_Sc001	518586	A	G	downstream_gene_variant	MODIFIER				BOH78_0248	transcript	ONH77902	protein_coding	c.*175A>G	175	,G	downstream_gene_variant	MODIFIER	BOH78_0249	BOH78_0249	transcript	ONH77903	protein_coding	c.*86T>C	86	,G	intergenic_region	MODIFIER	BOH78_0248-BOH78_0249	BOH78_0248-BOH78_0249	intergenic_region	BOH78_0248-BOH78_0249	n.518586A>G
BOH78_Sc001	518594	A	T	downstream_gene_variant	MODIFIER				BOH78_0248	transcript	ONH77902	protein_coding	c.*183A>T	183	,T	downstream_gene_variant	MODIFIER	BOH78_0249	BOH78_0249	transcript	ONH77903	protein_coding	c.*78T>A	78	,T	intergenic_region	MODIFIER	BOH78_0248-BOH78_0249	BOH78_0248-BOH78_0249	intergenic_region	BOH78_0248-BOH78_0249	n.518594A>T
BOH78_Sc001	532389	T	C	downstream_gene_variant	MODIFIER				BOH78_0254	transcript	ONH77714	protein_coding	c.*229T>C	229	,C	downstream_gene_variant	MODIFIER	BOH78_0255	BOH78_0255	transcript	ONH77713	protein_coding	c.*73A>G	73	,C	intergenic_region	MODIFIER	BOH78_0254-BOH78_0255	BOH78_0254-BOH78_0255	intergenic_region	BOH78_0254-BOH78_0255	n.532389T>C
BOH78_Sc001	532336	C	T	downstream_gene_variant	MODIFIER				BOH78_0254	transcript	ONH77714	protein_coding	c.*176C>T	176	,T	downstream_gene_variant	MODIFIER	BOH78_0255	BOH78_0255	transcript	ONH77713	protein_coding	c.*126G>A	126	,T	intergenic_region	MODIFIER	BOH78_0254-BOH78_0255	BOH78_0254-BOH78_0255	intergenic_region	BOH78_0254-BOH78_0255	n.532336C>T
BOH78_Sc001	541910	T	C	downstream_gene_variant	MODIFIER				BOH78_0257	transcript	ONH77715	protein_coding	c.*227T>C	227	,C	intergenic_region	MODIFIER	BOH78_0257-BOH78_0258	BOH78_0257-BOH78_0258	intergenic_region	BOH78_0257-BOH78_0258	n.541910T>C
BOH78_Sc001	542156	C	T	downstream_gene_variant	MODIFIER				BOH78_0257	transcript	ONH77715	protein_coding	c.*473C>T	473	,T	downstream_gene_variant	MODIFIER	BOH78_0258	BOH78_0258	transcript	ONH77712	protein_coding	c.*338G>A	338	,T	intergenic_region	MODIFIER	BOH78_0257-BOH78_0258	BOH78_0257-BOH78_0258	intergenic_region	BOH78_0257-BOH78_0258	n.542156C>T
BOH78_Sc001	544071	G	T	downstream_gene_variant	MODIFIER				BOH78_0259	transcript	ONH77711	protein_coding	c.*24G>T	24	,T	downstream_gene_variant	MODIFIER	BOH78_0260	BOH78_0260	transcript	ONH77926	protein_coding	c.*140C>A	140	,T	intergenic_region	MODIFIER	BOH78_0259-BOH78_0260	BOH78_0259-BOH78_0260	intergenic_region	BOH78_0259-BOH78_0260	n.544071G>T
BOH78_Sc001	544127	A	G	downstream_gene_variant	MODIFIER				BOH78_0259	transcript	ONH77711	protein_coding	c.*80A>G	80	,G	downstream_gene_variant	MODIFIER	BOH78_0260	BOH78_0260	transcript	ONH77926	protein_coding	c.*84T>C	84	,G	intergenic_region	MODIFIER	BOH78_0259-BOH78_0260	BOH78_0259-BOH78_0260	intergenic_region	BOH78_0259-BOH78_0260	n.544127A>G
BOH78_Sc001	555366	G	A	downstream_gene_variant	MODIFIER				BOH78_0265	transcript	ONH77923	protein_coding	c.*149G>A	149	,A	intergenic_region	MODIFIER	BOH78_0265-BOH78_0266	BOH78_0265-BOH78_0266	intergenic_region	BOH78_0265-BOH78_0266	n.555366G>A
BOH78_Sc001	555521	A	C	downstream_gene_variant	MODIFIER				BOH78_0265	transcript	ONH77923	protein_coding	c.*304A>C	304	,C	intergenic_region	MODIFIER	BOH78_0265-BOH78_0266	BOH78_0265-BOH78_0266	intergenic_region	BOH78_0265-BOH78_0266	n.555521A>C
BOH78_Sc001	555507	T	G	downstream_gene_variant	MODIFIER				BOH78_0265	transcript	ONH77923	protein_coding	c.*290T>G	290	,G	intergenic_region	MODIFIER	BOH78_0265-BOH78_0266	BOH78_0265-BOH78_0266	intergenic_region	BOH78_0265-BOH78_0266	n.555507T>G
BOH78_Sc001	555492	C	T	downstream_gene_variant	MODIFIER				BOH78_0265	transcript	ONH77923	protein_coding	c.*275C>T	275	,T	intergenic_region	MODIFIER	BOH78_0265-BOH78_0266	BOH78_0265-BOH78_0266	intergenic_region	BOH78_0265-BOH78_0266	n.555492C>T
BOH78_Sc001	555506	G	T	downstream_gene_variant	MODIFIER				BOH78_0265	transcript	ONH77923	protein_coding	c.*289G>T	289	,T	intergenic_region	MODIFIER	BOH78_0265-BOH78_0266	BOH78_0265-BOH78_0266	intergenic_region	BOH78_0265-BOH78_0266	n.555506G>T
BOH78_Sc001	555619	C	T	downstream_gene_variant	MODIFIER				BOH78_0265	transcript	ONH77923	protein_coding	c.*402C>T	402	,T	intergenic_region	MODIFIER	BOH78_0265-BOH78_0266	BOH78_0265-BOH78_0266	intergenic_region	BOH78_0265-BOH78_0266	n.555619C>T
BOH78_Sc001	559283	T	A	downstream_gene_variant	MODIFIER				BOH78_0266	transcript	ONH77924	protein_coding	c.*67T>A	67	,A	downstream_gene_variant	MODIFIER	BOH78_0267	BOH78_0267	transcript	ONH77925	protein_coding	c.*8A>T	8	,A	intergenic_region	MODIFIER	BOH78_0266-BOH78_0267	BOH78_0266-BOH78_0267	intergenic_region	BOH78_0266-BOH78_0267	n.559283T>A
BOH78_Sc001	560874	T	A	downstream_gene_variant	MODIFIER				BOH78_0268	transcript	ONH77930	protein_coding	c.*48T>A	48	,A	downstream_gene_variant	MODIFIER	BOH78_0269	BOH78_0269	transcript	ONH77931	protein_coding	c.*158A>T	158	,A	intergenic_region	MODIFIER	BOH78_0268-BOH78_0269	BOH78_0268-BOH78_0269	intergenic_region	BOH78_0268-BOH78_0269	n.560874T>A
BOH78_Sc001	561009	T	C	downstream_gene_variant	MODIFIER				BOH78_0268	transcript	ONH77930	protein_coding	c.*183T>C	183	,C	downstream_gene_variant	MODIFIER	BOH78_0269	BOH78_0269	transcript	ONH77931	protein_coding	c.*23A>G	23	,C	intergenic_region	MODIFIER	BOH78_0268-BOH78_0269	BOH78_0268-BOH78_0269	intergenic_region	BOH78_0268-BOH78_0269	n.561009T>C
BOH78_Sc001	560924	C	T	downstream_gene_variant	MODIFIER				BOH78_0268	transcript	ONH77930	protein_coding	c.*98C>T	98	,T	downstream_gene_variant	MODIFIER	BOH78_0269	BOH78_0269	transcript	ONH77931	protein_coding	c.*108G>A	108	,T	intergenic_region	MODIFIER	BOH78_0268-BOH78_0269	BOH78_0268-BOH78_0269	intergenic_region	BOH78_0268-BOH78_0269	n.560924C>T
BOH78_Sc001	564627	G	C	downstream_gene_variant	MODIFIER				BOH78_0270	transcript	ONH77738	protein_coding	c.*477C>G	477	,C	intergenic_region	MODIFIER	BOH78_0269-BOH78_0270	BOH78_0269-BOH78_0270	intergenic_region	BOH78_0269-BOH78_0270	n.564627G>C
BOH78_Sc001	564854	A	G	downstream_gene_variant	MODIFIER				BOH78_0270	transcript	ONH77738	protein_coding	c.*250T>C	250	,G	intergenic_region	MODIFIER	BOH78_0269-BOH78_0270	BOH78_0269-BOH78_0270	intergenic_region	BOH78_0269-BOH78_0270	n.564854A>G
BOH78_Sc001	564693	A	G	downstream_gene_variant	MODIFIER				BOH78_0270	transcript	ONH77738	protein_coding	c.*411T>C	411	,G	intergenic_region	MODIFIER	BOH78_0269-BOH78_0270	BOH78_0269-BOH78_0270	intergenic_region	BOH78_0269-BOH78_0270	n.564693A>G
BOH78_Sc001	583968	G	A	downstream_gene_variant	MODIFIER				BOH78_0276	transcript	ONH77740	protein_coding	c.*256G>A	256	,A	intergenic_region	MODIFIER	BOH78_0276-BOH78_0277	BOH78_0276-BOH78_0277	intergenic_region	BOH78_0276-BOH78_0277	n.583968G>A
BOH78_Sc001	584054	T	A	downstream_gene_variant	MODIFIER				BOH78_0276	transcript	ONH77740	protein_coding	c.*342T>A	342	,A	intergenic_region	MODIFIER	BOH78_0276-BOH78_0277	BOH78_0276-BOH78_0277	intergenic_region	BOH78_0276-BOH78_0277	n.584054T>A
BOH78_Sc001	584060	T	C	downstream_gene_variant	MODIFIER				BOH78_0276	transcript	ONH77740	protein_coding	c.*348T>C	348	,C	intergenic_region	MODIFIER	BOH78_0276-BOH78_0277	BOH78_0276-BOH78_0277	intergenic_region	BOH78_0276-BOH78_0277	n.584060T>C
BOH78_Sc001	583761	T	C	downstream_gene_variant	MODIFIER				BOH78_0276	transcript	ONH77740	protein_coding	c.*49T>C	49	,C	intergenic_region	MODIFIER	BOH78_0276-BOH78_0277	BOH78_0276-BOH78_0277	intergenic_region	BOH78_0276-BOH78_0277	n.583761T>C
BOH78_Sc001	583772	G	C	downstream_gene_variant	MODIFIER				BOH78_0276	transcript	ONH77740	protein_coding	c.*60G>C	60	,C	intergenic_region	MODIFIER	BOH78_0276-BOH78_0277	BOH78_0276-BOH78_0277	intergenic_region	BOH78_0276-BOH78_0277	n.583772G>C
BOH78_Sc001	583944	A	G	downstream_gene_variant	MODIFIER				BOH78_0276	transcript	ONH77740	protein_coding	c.*232A>G	232	,G	intergenic_region	MODIFIER	BOH78_0276-BOH78_0277	BOH78_0276-BOH78_0277	intergenic_region	BOH78_0276-BOH78_0277	n.583944A>G
BOH78_Sc001	583971	C	T	downstream_gene_variant	MODIFIER				BOH78_0276	transcript	ONH77740	protein_coding	c.*259C>T	259	,T	intergenic_region	MODIFIER	BOH78_0276-BOH78_0277	BOH78_0276-BOH78_0277	intergenic_region	BOH78_0276-BOH78_0277	n.583971C>T
BOH78_Sc001	584929	T	G	downstream_gene_variant	MODIFIER				BOH78_0277	transcript	ONH77739	protein_coding	c.*454A>C	454	,G	intergenic_region	MODIFIER	BOH78_0276-BOH78_0277	BOH78_0276-BOH78_0277	intergenic_region	BOH78_0276-BOH78_0277	n.584929T>G
BOH78_Sc001	584919	A	T	downstream_gene_variant	MODIFIER				BOH78_0277	transcript	ONH77739	protein_coding	c.*464T>A	464	,T	intergenic_region	MODIFIER	BOH78_0276-BOH78_0277	BOH78_0276-BOH78_0277	intergenic_region	BOH78_0276-BOH78_0277	n.584919A>T
BOH78_Sc001	584918	A	T	downstream_gene_variant	MODIFIER				BOH78_0277	transcript	ONH77739	protein_coding	c.*465T>A	465	,T	intergenic_region	MODIFIER	BOH78_0276-BOH78_0277	BOH78_0276-BOH78_0277	intergenic_region	BOH78_0276-BOH78_0277	n.584918A>T
BOH78_Sc001	591343	T	C	downstream_gene_variant	MODIFIER				BOH78_0278	transcript	ONH77744	protein_coding	c.*150T>C	150	,C	downstream_gene_variant	MODIFIER	BOH78_0279	BOH78_0279	transcript	ONH77743	protein_coding	c.*225A>G	225	,C	intergenic_region	MODIFIER	BOH78_0278-BOH78_0279	BOH78_0278-BOH78_0279	intergenic_region	BOH78_0278-BOH78_0279	n.591343T>C
BOH78_Sc001	591528	T	C	downstream_gene_variant	MODIFIER				BOH78_0278	transcript	ONH77744	protein_coding	c.*335T>C	335	,C	downstream_gene_variant	MODIFIER	BOH78_0279	BOH78_0279	transcript	ONH77743	protein_coding	c.*40A>G	40	,C	intergenic_region	MODIFIER	BOH78_0278-BOH78_0279	BOH78_0278-BOH78_0279	intergenic_region	BOH78_0278-BOH78_0279	n.591528T>C
BOH78_Sc001	591243	T	C	downstream_gene_variant	MODIFIER				BOH78_0278	transcript	ONH77744	protein_coding	c.*50T>C	50	,C	downstream_gene_variant	MODIFIER	BOH78_0279	BOH78_0279	transcript	ONH77743	protein_coding	c.*325A>G	325	,C	intergenic_region	MODIFIER	BOH78_0278-BOH78_0279	BOH78_0278-BOH78_0279	intergenic_region	BOH78_0278-BOH78_0279	n.591243T>C
BOH78_Sc001	598617	A	G	downstream_gene_variant	MODIFIER				BOH78_0282	transcript	ONH77808	protein_coding	c.*64A>G	64	,G	downstream_gene_variant	MODIFIER	BOH78_0283	BOH78_0283	transcript	ONH77809	protein_coding	c.*64T>C	64	WARNING_TRANSCRIPT_NO_START_CODON,G	intergenic_region	MODIFIER	BOH78_0282-BOH78_0283	BOH78_0282-BOH78_0283	intergenic_region	BOH78_0282-BOH78_0283	n.598617A>G
BOH78_Sc001	598638	C	T	downstream_gene_variant	MODIFIER				BOH78_0282	transcript	ONH77808	protein_coding	c.*85C>T	85	,T	downstream_gene_variant	MODIFIER	BOH78_0283	BOH78_0283	transcript	ONH77809	protein_coding	c.*43G>A	43	WARNING_TRANSCRIPT_NO_START_CODON,T	intergenic_region	MODIFIER	BOH78_0282-BOH78_0283	BOH78_0282-BOH78_0283	intergenic_region	BOH78_0282-BOH78_0283	n.598638C>T
BOH78_Sc001	614146	A	G	downstream_gene_variant	MODIFIER				BOH78_0291	transcript	ONH77622	protein_coding	c.*26A>G	26	,G	downstream_gene_variant	MODIFIER	BOH78_0292	BOH78_0292	transcript	ONH77625	protein_coding	c.*194T>C	194	,G	intergenic_region	MODIFIER	BOH78_0291-BOH78_0292	BOH78_0291-BOH78_0292	intergenic_region	BOH78_0291-BOH78_0292	n.614146A>G
BOH78_Sc001	620257	C	T	downstream_gene_variant	MODIFIER				BOH78_0293	transcript	ONH77624	protein_coding	c.*105C>T	105	,T	downstream_gene_variant	MODIFIER	BOH78_0294	BOH78_0294	transcript	ONH77627	protein_coding	c.*10G>A	10	,T	intergenic_region	MODIFIER	BOH78_0293-BOH78_0294	BOH78_0293-BOH78_0294	intergenic_region	BOH78_0293-BOH78_0294	n.620257C>T
BOH78_Sc001	624225	C	T	downstream_gene_variant	MODIFIER				BOH78_0295	transcript	ONH77626	protein_coding	c.*141C>T	141	,T	downstream_gene_variant	MODIFIER	BOH78_0296	BOH78_0296	transcript	ONH77629	protein_coding	c.*30G>A	30	,T	intergenic_region	MODIFIER	BOH78_0295-BOH78_0296	BOH78_0295-BOH78_0296	intergenic_region	BOH78_0295-BOH78_0296	n.624225C>T
BOH78_Sc001	628106	A	G	downstream_gene_variant	MODIFIER				BOH78_0299	transcript	ONH77620	protein_coding	c.*110A>G	110	,G	intergenic_region	MODIFIER	BOH78_0299-BOH78_0300	BOH78_0299-BOH78_0300	intergenic_region	BOH78_0299-BOH78_0300	n.628106A>G
BOH78_Sc001	633188	C	A	downstream_gene_variant	MODIFIER				BOH78_0300	transcript	ONH77791	protein_coding	c.*266C>A	266	,A	intergenic_region	MODIFIER	BOH78_0300-BOH78_0301	BOH78_0300-BOH78_0301	intergenic_region	BOH78_0300-BOH78_0301	n.633188C>A
BOH78_Sc001	638053	G	A	downstream_gene_variant	MODIFIER				BOH78_0301	transcript	ONH77790	protein_coding	c.*114G>A	114	,A	intergenic_region	MODIFIER	BOH78_0301-BOH78_0302	BOH78_0301-BOH78_0302	intergenic_region	BOH78_0301-BOH78_0302	n.638053G>A
BOH78_Sc001	638127	A	C	downstream_gene_variant	MODIFIER				BOH78_0301	transcript	ONH77790	protein_coding	c.*188A>C	188	,C	intergenic_region	MODIFIER	BOH78_0301-BOH78_0302	BOH78_0301-BOH78_0302	intergenic_region	BOH78_0301-BOH78_0302	n.638127A>C
BOH78_Sc001	640265	T	A	downstream_gene_variant	MODIFIER				BOH78_0302	transcript	ONH77789	protein_coding	c.*343A>T	343	,A	intergenic_region	MODIFIER	BOH78_0301-BOH78_0302	BOH78_0301-BOH78_0302	intergenic_region	BOH78_0301-BOH78_0302	n.640265T>A
BOH78_Sc001	640182	T	C	downstream_gene_variant	MODIFIER				BOH78_0302	transcript	ONH77789	protein_coding	c.*426A>G	426	,C	intergenic_region	MODIFIER	BOH78_0301-BOH78_0302	BOH78_0301-BOH78_0302	intergenic_region	BOH78_0301-BOH78_0302	n.640182T>C
BOH78_Sc001	640343	A	G	downstream_gene_variant	MODIFIER				BOH78_0302	transcript	ONH77789	protein_coding	c.*265T>C	265	,G	intergenic_region	MODIFIER	BOH78_0301-BOH78_0302	BOH78_0301-BOH78_0302	intergenic_region	BOH78_0301-BOH78_0302	n.640343A>G
BOH78_Sc001	640355	C	T	downstream_gene_variant	MODIFIER				BOH78_0302	transcript	ONH77789	protein_coding	c.*253G>A	253	,T	intergenic_region	MODIFIER	BOH78_0301-BOH78_0302	BOH78_0301-BOH78_0302	intergenic_region	BOH78_0301-BOH78_0302	n.640355C>T
BOH78_Sc001	643620	T	C	downstream_gene_variant	MODIFIER				BOH78_0303	transcript	ONH77788	protein_coding	c.*164T>C	164	,C	downstream_gene_variant	MODIFIER	BOH78_0304	BOH78_0304	transcript	ONH77795	protein_coding	c.*158A>G	158	,C	intergenic_region	MODIFIER	BOH78_0303-BOH78_0304	BOH78_0303-BOH78_0304	intergenic_region	BOH78_0303-BOH78_0304	n.643620T>C
BOH78_Sc001	643739	G	C	downstream_gene_variant	MODIFIER				BOH78_0303	transcript	ONH77788	protein_coding	c.*283G>C	283	,C	downstream_gene_variant	MODIFIER	BOH78_0304	BOH78_0304	transcript	ONH77795	protein_coding	c.*39C>G	39	,C	intergenic_region	MODIFIER	BOH78_0303-BOH78_0304	BOH78_0303-BOH78_0304	intergenic_region	BOH78_0303-BOH78_0304	n.643739G>C
BOH78_Sc001	643774	A	G	downstream_gene_variant	MODIFIER				BOH78_0303	transcript	ONH77788	protein_coding	c.*318A>G	318	,G	downstream_gene_variant	MODIFIER	BOH78_0304	BOH78_0304	transcript	ONH77795	protein_coding	c.*4T>C	4	,G	intergenic_region	MODIFIER	BOH78_0303-BOH78_0304	BOH78_0303-BOH78_0304	intergenic_region	BOH78_0303-BOH78_0304	n.643774A>G
BOH78_Sc001	643749	C	T	downstream_gene_variant	MODIFIER				BOH78_0303	transcript	ONH77788	protein_coding	c.*293C>T	293	,T	downstream_gene_variant	MODIFIER	BOH78_0304	BOH78_0304	transcript	ONH77795	protein_coding	c.*29G>A	29	,T	intergenic_region	MODIFIER	BOH78_0303-BOH78_0304	BOH78_0303-BOH78_0304	intergenic_region	BOH78_0303-BOH78_0304	n.643749C>T
BOH78_Sc001	660279	G	A	downstream_gene_variant	MODIFIER				BOH78_0310	transcript	ONH77606	protein_coding	c.*111C>T	111	,A	intergenic_region	MODIFIER	BOH78_0309-BOH78_0310	BOH78_0309-BOH78_0310	intergenic_region	BOH78_0309-BOH78_0310	n.660279G>A
BOH78_Sc001	660211	G	A	downstream_gene_variant	MODIFIER				BOH78_0310	transcript	ONH77606	protein_coding	c.*179C>T	179	,A	intergenic_region	MODIFIER	BOH78_0309-BOH78_0310	BOH78_0309-BOH78_0310	intergenic_region	BOH78_0309-BOH78_0310	n.660211G>A
BOH78_Sc001	660371	T	C	downstream_gene_variant	MODIFIER				BOH78_0310	transcript	ONH77606	protein_coding	c.*19A>G	19	,C	intergenic_region	MODIFIER	BOH78_0309-BOH78_0310	BOH78_0309-BOH78_0310	intergenic_region	BOH78_0309-BOH78_0310	n.660371T>C
BOH78_Sc001	660388	T	C	downstream_gene_variant	MODIFIER				BOH78_0310	transcript	ONH77606	protein_coding	c.*2A>G	2	,C	intergenic_region	MODIFIER	BOH78_0309-BOH78_0310	BOH78_0309-BOH78_0310	intergenic_region	BOH78_0309-BOH78_0310	n.660388T>C
BOH78_Sc001	668698	G	A	downstream_gene_variant	MODIFIER				BOH78_0311	transcript	ONH77607	protein_coding	c.*139C>T	139	,A	intergenic_region	MODIFIER	BOH78_0310-BOH78_0311	BOH78_0310-BOH78_0311	intergenic_region	BOH78_0310-BOH78_0311	n.668698G>A
BOH78_Sc001	668363	G	A	downstream_gene_variant	MODIFIER				BOH78_0311	transcript	ONH77607	protein_coding	c.*474C>T	474	,A	intergenic_region	MODIFIER	BOH78_0310-BOH78_0311	BOH78_0310-BOH78_0311	intergenic_region	BOH78_0310-BOH78_0311	n.668363G>A
BOH78_Sc001	670750	T	A	downstream_gene_variant	MODIFIER				BOH78_0312	transcript	ONH77608	protein_coding	c.*459A>T	459	,A	intergenic_region	MODIFIER	BOH78_0311-BOH78_0312	BOH78_0311-BOH78_0312	intergenic_region	BOH78_0311-BOH78_0312	n.670750T>A
BOH78_Sc001	670756	T	C	downstream_gene_variant	MODIFIER				BOH78_0312	transcript	ONH77608	protein_coding	c.*453A>G	453	,C	intergenic_region	MODIFIER	BOH78_0311-BOH78_0312	BOH78_0311-BOH78_0312	intergenic_region	BOH78_0311-BOH78_0312	n.670756T>C
BOH78_Sc001	680893	T	C	downstream_gene_variant	MODIFIER				BOH78_0315	transcript	ONH77603	protein_coding	c.*79T>C	79	,C	intergenic_region	MODIFIER	BOH78_0315-BOH78_0316	BOH78_0315-BOH78_0316	intergenic_region	BOH78_0315-BOH78_0316	n.680893T>C
BOH78_Sc001	680913	C	T	downstream_gene_variant	MODIFIER				BOH78_0315	transcript	ONH77603	protein_coding	c.*99C>T	99	,T	intergenic_region	MODIFIER	BOH78_0315-BOH78_0316	BOH78_0315-BOH78_0316	intergenic_region	BOH78_0315-BOH78_0316	n.680913C>T
BOH78_Sc001	681146	A	G	downstream_gene_variant	MODIFIER				BOH78_0315	transcript	ONH77603	protein_coding	c.*332A>G	332	,G	intergenic_region	MODIFIER	BOH78_0315-BOH78_0316	BOH78_0315-BOH78_0316	intergenic_region	BOH78_0315-BOH78_0316	n.681146A>G
BOH78_Sc001	684681	G	A	downstream_gene_variant	MODIFIER				BOH78_0316	transcript	ONH77604	protein_coding	c.*259G>A	259	,A	intergenic_region	MODIFIER	BOH78_0316-BOH78_0317	BOH78_0316-BOH78_0317	intergenic_region	BOH78_0316-BOH78_0317	n.684681G>A
BOH78_Sc001	684427	C	A	downstream_gene_variant	MODIFIER				BOH78_0316	transcript	ONH77604	protein_coding	c.*5C>A	5	,A	intergenic_region	MODIFIER	BOH78_0316-BOH78_0317	BOH78_0316-BOH78_0317	intergenic_region	BOH78_0316-BOH78_0317	n.684427C>A
BOH78_Sc001	684677	T	C	downstream_gene_variant	MODIFIER				BOH78_0316	transcript	ONH77604	protein_coding	c.*255T>C	255	,C	intergenic_region	MODIFIER	BOH78_0316-BOH78_0317	BOH78_0316-BOH78_0317	intergenic_region	BOH78_0316-BOH78_0317	n.684677T>C
BOH78_Sc001	684648	G	T	downstream_gene_variant	MODIFIER				BOH78_0316	transcript	ONH77604	protein_coding	c.*226G>T	226	,T	intergenic_region	MODIFIER	BOH78_0316-BOH78_0317	BOH78_0316-BOH78_0317	intergenic_region	BOH78_0316-BOH78_0317	n.684648G>T
BOH78_Sc001	684710	C	T	downstream_gene_variant	MODIFIER				BOH78_0316	transcript	ONH77604	protein_coding	c.*288C>T	288	,T	intergenic_region	MODIFIER	BOH78_0316-BOH78_0317	BOH78_0316-BOH78_0317	intergenic_region	BOH78_0316-BOH78_0317	n.684710C>T
BOH78_Sc001	684711	C	T	downstream_gene_variant	MODIFIER				BOH78_0316	transcript	ONH77604	protein_coding	c.*289C>T	289	,T	intergenic_region	MODIFIER	BOH78_0316-BOH78_0317	BOH78_0316-BOH78_0317	intergenic_region	BOH78_0316-BOH78_0317	n.684711C>T
BOH78_Sc001	690120	C	A	downstream_gene_variant	MODIFIER				BOH78_0319	transcript	ONH77601	protein_coding	c.*90C>A	90	,A	downstream_gene_variant	MODIFIER	BOH78_0320	BOH78_0320	transcript	ONH77781	protein_coding	c.*104G>T	104	,A	intergenic_region	MODIFIER	BOH78_0319-BOH78_0320	BOH78_0319-BOH78_0320	intergenic_region	BOH78_0319-BOH78_0320	n.690120C>A
BOH78_Sc001	692052	C	T	downstream_gene_variant	MODIFIER				BOH78_0321	transcript	ONH77780	protein_coding	c.*37C>T	37	,T	downstream_gene_variant	MODIFIER	BOH78_0322	BOH78_0322	transcript	ONH77783	protein_coding	c.*210G>A	210	,T	intergenic_region	MODIFIER	BOH78_0321-BOH78_0322	BOH78_0321-BOH78_0322	intergenic_region	BOH78_0321-BOH78_0322	n.692052C>T
BOH78_Sc001	696244	A	G	downstream_gene_variant	MODIFIER				BOH78_0325	transcript	ONH77776	protein_coding	c.*4A>G	4	,G	intergenic_region	MODIFIER	BOH78_0325-BOH78_0326	BOH78_0325-BOH78_0326	intergenic_region	BOH78_0325-BOH78_0326	n.696244A>G
BOH78_Sc001	698908	T	C	downstream_gene_variant	MODIFIER				BOH78_0326	transcript	ONH77779	protein_coding	c.*167T>C	167	,C	downstream_gene_variant	MODIFIER	BOH78_0327	BOH78_0327	transcript	ONH77778	protein_coding	c.*266A>G	266	,C	intergenic_region	MODIFIER	BOH78_0326-BOH78_0327	BOH78_0326-BOH78_0327	intergenic_region	BOH78_0326-BOH78_0327	n.698908T>C
BOH78_Sc001	699148	T	C	downstream_gene_variant	MODIFIER				BOH78_0326	transcript	ONH77779	protein_coding	c.*407T>C	407	,C	downstream_gene_variant	MODIFIER	BOH78_0327	BOH78_0327	transcript	ONH77778	protein_coding	c.*26A>G	26	,C	intergenic_region	MODIFIER	BOH78_0326-BOH78_0327	BOH78_0326-BOH78_0327	intergenic_region	BOH78_0326-BOH78_0327	n.699148T>C
BOH78_Sc001	698747	G	C	downstream_gene_variant	MODIFIER				BOH78_0326	transcript	ONH77779	protein_coding	c.*6G>C	6	,C	downstream_gene_variant	MODIFIER	BOH78_0327	BOH78_0327	transcript	ONH77778	protein_coding	c.*427C>G	427	,C	intergenic_region	MODIFIER	BOH78_0326-BOH78_0327	BOH78_0326-BOH78_0327	intergenic_region	BOH78_0326-BOH78_0327	n.698747G>C
BOH78_Sc001	699029	C	T	downstream_gene_variant	MODIFIER				BOH78_0326	transcript	ONH77779	protein_coding	c.*288C>T	288	,T	downstream_gene_variant	MODIFIER	BOH78_0327	BOH78_0327	transcript	ONH77778	protein_coding	c.*145G>A	145	,T	intergenic_region	MODIFIER	BOH78_0326-BOH78_0327	BOH78_0326-BOH78_0327	intergenic_region	BOH78_0326-BOH78_0327	n.699029C>T
BOH78_Sc001	701238	T	A	downstream_gene_variant	MODIFIER				BOH78_0329	transcript	ONH77784	protein_coding	c.*220A>T	220	,A	intron_variant	MODIFIER	BOH78_0328	BOH78_0328	transcript	ONH77785	protein_coding	2023-01-01	c.437+25T>A
BOH78_Sc001	711087	C	T	downstream_gene_variant	MODIFIER				BOH78_0331	transcript	ONH77597	protein_coding	c.*175C>T	175	,T	intergenic_region	MODIFIER	BOH78_0331-BOH78_0332	BOH78_0331-BOH78_0332	intergenic_region	BOH78_0331-BOH78_0332	n.711087C>T
BOH78_Sc001	711570	C	A	downstream_gene_variant	MODIFIER				BOH78_0332	transcript	ONH77594	protein_coding	c.*278G>T	278	,A	intergenic_region	MODIFIER	BOH78_0331-BOH78_0332	BOH78_0331-BOH78_0332	intergenic_region	BOH78_0331-BOH78_0332	n.711570C>A
BOH78_Sc001	711591	G	C	downstream_gene_variant	MODIFIER				BOH78_0332	transcript	ONH77594	protein_coding	c.*257C>G	257	,C	intergenic_region	MODIFIER	BOH78_0331-BOH78_0332	BOH78_0331-BOH78_0332	intergenic_region	BOH78_0331-BOH78_0332	n.711591G>C
BOH78_Sc001	711582	T	C	downstream_gene_variant	MODIFIER				BOH78_0332	transcript	ONH77594	protein_coding	c.*266A>G	266	,C	intergenic_region	MODIFIER	BOH78_0331-BOH78_0332	BOH78_0331-BOH78_0332	intergenic_region	BOH78_0331-BOH78_0332	n.711582T>C
BOH78_Sc001	711594	A	G	downstream_gene_variant	MODIFIER				BOH78_0332	transcript	ONH77594	protein_coding	c.*254T>C	254	,G	intergenic_region	MODIFIER	BOH78_0331-BOH78_0332	BOH78_0331-BOH78_0332	intergenic_region	BOH78_0331-BOH78_0332	n.711594A>G
BOH78_Sc001	711584	T	G	downstream_gene_variant	MODIFIER				BOH78_0332	transcript	ONH77594	protein_coding	c.*264A>C	264	,G	intergenic_region	MODIFIER	BOH78_0331-BOH78_0332	BOH78_0331-BOH78_0332	intergenic_region	BOH78_0331-BOH78_0332	n.711584T>G
BOH78_Sc001	711583	A	G	downstream_gene_variant	MODIFIER				BOH78_0332	transcript	ONH77594	protein_coding	c.*265T>C	265	,G	intergenic_region	MODIFIER	BOH78_0331-BOH78_0332	BOH78_0331-BOH78_0332	intergenic_region	BOH78_0331-BOH78_0332	n.711583A>G
BOH78_Sc001	711731	C	T	downstream_gene_variant	MODIFIER				BOH78_0332	transcript	ONH77594	protein_coding	c.*117G>A	117	,T	intergenic_region	MODIFIER	BOH78_0331-BOH78_0332	BOH78_0331-BOH78_0332	intergenic_region	BOH78_0331-BOH78_0332	n.711731C>T
BOH78_Sc001	711601	C	T	downstream_gene_variant	MODIFIER				BOH78_0332	transcript	ONH77594	protein_coding	c.*247G>A	247	,T	intergenic_region	MODIFIER	BOH78_0331-BOH78_0332	BOH78_0331-BOH78_0332	intergenic_region	BOH78_0331-BOH78_0332	n.711601C>T
BOH78_Sc001	725481	A	C	downstream_gene_variant	MODIFIER				BOH78_0338	transcript	ONH77598	protein_coding	c.*15A>C	15	,C	downstream_gene_variant	MODIFIER	BOH78_0339	BOH78_0339	transcript	ONH77599	protein_coding	c.*29T>G	29	,C	intergenic_region	MODIFIER	BOH78_0338-BOH78_0339	BOH78_0338-BOH78_0339	intergenic_region	BOH78_0338-BOH78_0339	n.725481A>C
BOH78_Sc001	725473	T	G	downstream_gene_variant	MODIFIER				BOH78_0338	transcript	ONH77598	protein_coding	c.*7T>G	7	,G	downstream_gene_variant	MODIFIER	BOH78_0339	BOH78_0339	transcript	ONH77599	protein_coding	c.*37A>C	37	,G	intergenic_region	MODIFIER	BOH78_0338-BOH78_0339	BOH78_0338-BOH78_0339	intergenic_region	BOH78_0338-BOH78_0339	n.725473T>G
BOH78_Sc001	741219	A	T	downstream_gene_variant	MODIFIER				BOH78_0348	transcript	ONH77767	protein_coding	c.*17A>T	17	,T	downstream_gene_variant	MODIFIER	BOH78_0349	BOH78_0349	transcript	ONH77766	protein_coding	c.*92T>A	92	,T	intergenic_region	MODIFIER	BOH78_0348-BOH78_0349	BOH78_0348-BOH78_0349	intergenic_region	BOH78_0348-BOH78_0349	n.741219A>T
BOH78_Sc001	750320	A	T	downstream_gene_variant	MODIFIER				BOH78_0352	transcript	ONH77582	protein_coding	c.*114T>A	114	,T	intergenic_region	MODIFIER	BOH78_0351-BOH78_0352	BOH78_0351-BOH78_0352	intergenic_region	BOH78_0351-BOH78_0352	n.750320A>T
BOH78_Sc001	756202	C	T	downstream_gene_variant	MODIFIER				BOH78_0353	transcript	ONH77583	protein_coding	c.*14C>T	14	,T	downstream_gene_variant	MODIFIER	BOH78_0354	BOH78_0354	transcript	ONH77584	protein_coding	c.*107G>A	107	,T	intergenic_region	MODIFIER	BOH78_0353-BOH78_0354	BOH78_0353-BOH78_0354	intergenic_region	BOH78_0353-BOH78_0354	n.756202C>T
BOH78_Sc001	763712	G	A	downstream_gene_variant	MODIFIER				BOH78_0356	transcript	ONH77586	protein_coding	c.*81G>A	81	,A	downstream_gene_variant	MODIFIER	BOH78_0357	BOH78_0357	transcript	ONH77587	protein_coding	c.*314C>T	314	,A	intergenic_region	MODIFIER	BOH78_0356-BOH78_0357	BOH78_0356-BOH78_0357	intergenic_region	BOH78_0356-BOH78_0357	n.763712G>A
BOH78_Sc001	763844	A	G	downstream_gene_variant	MODIFIER				BOH78_0356	transcript	ONH77586	protein_coding	c.*213A>G	213	,G	downstream_gene_variant	MODIFIER	BOH78_0357	BOH78_0357	transcript	ONH77587	protein_coding	c.*182T>C	182	,G	intergenic_region	MODIFIER	BOH78_0356-BOH78_0357	BOH78_0356-BOH78_0357	intergenic_region	BOH78_0356-BOH78_0357	n.763844A>G
BOH78_Sc001	771973	C	A	downstream_gene_variant	MODIFIER				BOH78_0361	transcript	ONH77757	protein_coding	c.*337C>A	337	,A	intergenic_region	MODIFIER	BOH78_0361-BOH78_0362	BOH78_0361-BOH78_0362	intergenic_region	BOH78_0361-BOH78_0362	n.771973C>A
BOH78_Sc001	771764	A	C	downstream_gene_variant	MODIFIER				BOH78_0361	transcript	ONH77757	protein_coding	c.*128A>C	128	,C	intergenic_region	MODIFIER	BOH78_0361-BOH78_0362	BOH78_0361-BOH78_0362	intergenic_region	BOH78_0361-BOH78_0362	n.771764A>C
BOH78_Sc001	771991	A	C	downstream_gene_variant	MODIFIER				BOH78_0361	transcript	ONH77757	protein_coding	c.*355A>C	355	,C	intergenic_region	MODIFIER	BOH78_0361-BOH78_0362	BOH78_0361-BOH78_0362	intergenic_region	BOH78_0361-BOH78_0362	n.771991A>C
BOH78_Sc001	771976	A	G	downstream_gene_variant	MODIFIER				BOH78_0361	transcript	ONH77757	protein_coding	c.*340A>G	340	,G	intergenic_region	MODIFIER	BOH78_0361-BOH78_0362	BOH78_0361-BOH78_0362	intergenic_region	BOH78_0361-BOH78_0362	n.771976A>G
BOH78_Sc001	771884	A	G	downstream_gene_variant	MODIFIER				BOH78_0361	transcript	ONH77757	protein_coding	c.*248A>G	248	,G	intergenic_region	MODIFIER	BOH78_0361-BOH78_0362	BOH78_0361-BOH78_0362	intergenic_region	BOH78_0361-BOH78_0362	n.771884A>G
BOH78_Sc002	4977	C	T	downstream_gene_variant	MODIFIER				BOH78_0363	transcript	ONH77253	protein_coding	c.*344C>T	344	,T	downstream_gene_variant	MODIFIER	BOH78_0364	BOH78_0364	transcript	ONH77255	protein_coding	c.*103G>A	103	,T	intergenic_region	MODIFIER	BOH78_0363-BOH78_0364	BOH78_0363-BOH78_0364	intergenic_region	BOH78_0363-BOH78_0364	n.4977C>T
BOH78_Sc002	15083	G	A	downstream_gene_variant	MODIFIER				BOH78_0370	transcript	ONH77097	protein_coding	c.*14G>A	14	,A	intergenic_region	MODIFIER	BOH78_0370-BOH78_0371	BOH78_0370-BOH78_0371	intergenic_region	BOH78_0370-BOH78_0371	n.15083G>A
BOH78_Sc002	18247	C	A	downstream_gene_variant	MODIFIER				BOH78_0371	transcript	ONH77098	protein_coding	c.*58C>A	58	,A	downstream_gene_variant	MODIFIER	BOH78_0372	BOH78_0372	transcript	ONH77095	protein_coding	c.*220G>T	220	,A	intergenic_region	MODIFIER	BOH78_0371-BOH78_0372	BOH78_0371-BOH78_0372	intergenic_region	BOH78_0371-BOH78_0372	n.18247C>A
BOH78_Sc002	21443	C	T	downstream_gene_variant	MODIFIER				BOH78_0373	transcript	ONH77096	protein_coding	c.*52C>T	52	,T	downstream_gene_variant	MODIFIER	BOH78_0374	BOH78_0374	transcript	ONH77101	protein_coding	c.*117G>A	117	,T	intergenic_region	MODIFIER	BOH78_0373-BOH78_0374	BOH78_0373-BOH78_0374	intergenic_region	BOH78_0373-BOH78_0374	n.21443C>T
BOH78_Sc002	25182	A	T	downstream_gene_variant	MODIFIER				BOH78_0375	transcript	ONH77102	protein_coding	c.*177T>A	177	,T	intergenic_region	MODIFIER	BOH78_0374-BOH78_0375	BOH78_0374-BOH78_0375	intergenic_region	BOH78_0374-BOH78_0375	n.25182A>T
BOH78_Sc002	25199	A	G	downstream_gene_variant	MODIFIER				BOH78_0375	transcript	ONH77102	protein_coding	c.*160T>C	160	,G	intergenic_region	MODIFIER	BOH78_0374-BOH78_0375	BOH78_0374-BOH78_0375	intergenic_region	BOH78_0374-BOH78_0375	n.25199A>G
BOH78_Sc002	27893	G	A,T	downstream_gene_variant	MODIFIER				BOH78_0376	transcript	ONH77099	protein_coding	c.*125G>A	125	,T	downstream_gene_variant	MODIFIER	BOH78_0376	BOH78_0376	transcript	ONH77099	protein_coding	c.*125G>T	125	,A	downstream_gene_variant	MODIFIER	BOH78_0377	BOH78_0377	transcript	ONH77100	protein_coding	c.*17C>T	17	,T	downstream_gene_variant	MODIFIER	BOH78_0377	BOH78_0377	transcript	ONH77100	protein_coding	c.*17C>A	17	,A	intergenic_region	MODIFIER	BOH78_0376-BOH78_0377	BOH78_0376-BOH78_0377
BOH78_Sc002	27776	T	C	downstream_gene_variant	MODIFIER				BOH78_0376	transcript	ONH77099	protein_coding	c.*8T>C	8	,C	downstream_gene_variant	MODIFIER	BOH78_0377	BOH78_0377	transcript	ONH77100	protein_coding	c.*134A>G	134	,C	intergenic_region	MODIFIER	BOH78_0376-BOH78_0377	BOH78_0376-BOH78_0377	intergenic_region	BOH78_0376-BOH78_0377	n.27776T>C
BOH78_Sc002	27862	A	G	downstream_gene_variant	MODIFIER				BOH78_0376	transcript	ONH77099	protein_coding	c.*94A>G	94	,G	downstream_gene_variant	MODIFIER	BOH78_0377	BOH78_0377	transcript	ONH77100	protein_coding	c.*48T>C	48	,G	intergenic_region	MODIFIER	BOH78_0376-BOH78_0377	BOH78_0376-BOH78_0377	intergenic_region	BOH78_0376-BOH78_0377	n.27862A>G
BOH78_Sc002	27894	G	A	downstream_gene_variant	MODIFIER				BOH78_0376	transcript	ONH77099	protein_coding	c.*126G>A	126	,A	downstream_gene_variant	MODIFIER	BOH78_0377	BOH78_0377	transcript	ONH77100	protein_coding	c.*16C>T	16	,A	intergenic_region	MODIFIER	BOH78_0376-BOH78_0377	BOH78_0376-BOH78_0377	intergenic_region	BOH78_0376-BOH78_0377	n.27894G>A
BOH78_Sc002	36274	A	G	downstream_gene_variant	MODIFIER				BOH78_0379	transcript	ONH77094	protein_coding	c.*63A>G	63	,G	downstream_gene_variant	MODIFIER	BOH78_0380	BOH78_0380	transcript	ONH77353	protein_coding	c.*99T>C	99	,G	intergenic_region	MODIFIER	BOH78_0379-BOH78_0380	BOH78_0379-BOH78_0380	intergenic_region	BOH78_0379-BOH78_0380	n.36274A>G
BOH78_Sc002	36217	G	A	downstream_gene_variant	MODIFIER				BOH78_0379	transcript	ONH77094	protein_coding	c.*6G>A	6	,A	downstream_gene_variant	MODIFIER	BOH78_0380	BOH78_0380	transcript	ONH77353	protein_coding	c.*156C>T	156	,A	intergenic_region	MODIFIER	BOH78_0379-BOH78_0380	BOH78_0379-BOH78_0380	intergenic_region	BOH78_0379-BOH78_0380	n.36217G>A
BOH78_Sc002	39770	C	T	downstream_gene_variant	MODIFIER				BOH78_0382	transcript	ONH77351	protein_coding	c.*385G>A	385	,T	intron_variant	MODIFIER	BOH78_0381	BOH78_0381	transcript	ONH77352	protein_coding	2023-01-01	c.1345-59C>T	WARNING_TRANSCRIPT_NO_STOP_CODON
BOH78_Sc002	39767	C	T	downstream_gene_variant	MODIFIER				BOH78_0382	transcript	ONH77351	protein_coding	c.*388G>A	388	,T	intron_variant	MODIFIER	BOH78_0381	BOH78_0381	transcript	ONH77352	protein_coding	2023-01-01	c.1345-62C>T	WARNING_TRANSCRIPT_NO_STOP_CODON
BOH78_Sc002	42357	T	C	downstream_gene_variant	MODIFIER				BOH78_0383	transcript	ONH77350	protein_coding	c.*16T>C	16	,C	downstream_gene_variant	MODIFIER	BOH78_0384	BOH78_0384	transcript	ONH77356	protein_coding	c.*203A>G	203	,C	intergenic_region	MODIFIER	BOH78_0383-BOH78_0384	BOH78_0383-BOH78_0384	intergenic_region	BOH78_0383-BOH78_0384	n.42357T>C
BOH78_Sc002	42553	G	A	downstream_gene_variant	MODIFIER				BOH78_0383	transcript	ONH77350	protein_coding	c.*212G>A	212	,A	downstream_gene_variant	MODIFIER	BOH78_0384	BOH78_0384	transcript	ONH77356	protein_coding	c.*7C>T	7	,A	intergenic_region	MODIFIER	BOH78_0383-BOH78_0384	BOH78_0383-BOH78_0384	intergenic_region	BOH78_0383-BOH78_0384	n.42553G>A
BOH78_Sc002	46893	T	A	downstream_gene_variant	MODIFIER				BOH78_0387	transcript	ONH77354	protein_coding	c.*184A>T	184	,A	intergenic_region	MODIFIER	BOH78_0386-BOH78_0387	BOH78_0386-BOH78_0387	intergenic_region	BOH78_0386-BOH78_0387	n.46893T>A
BOH78_Sc002	49156	G	A	downstream_gene_variant	MODIFIER				BOH78_0388	transcript	ONH77319	protein_coding	c.*13C>T	13	,A	intergenic_region	MODIFIER	BOH78_0387-BOH78_0388	BOH78_0387-BOH78_0388	intergenic_region	BOH78_0387-BOH78_0388	n.49156G>A
BOH78_Sc002	53617	T	C	downstream_gene_variant	MODIFIER				BOH78_0389	transcript	ONH77357	protein_coding	c.*87T>C	87	,C	intergenic_region	MODIFIER	BOH78_0389-BOH78_0390	BOH78_0389-BOH78_0390	intergenic_region	BOH78_0389-BOH78_0390	n.53617T>C
BOH78_Sc002	53532	T	C	downstream_gene_variant	MODIFIER				BOH78_0389	transcript	ONH77357	protein_coding	c.*2T>C	2	,C	intergenic_region	MODIFIER	BOH78_0389-BOH78_0390	BOH78_0389-BOH78_0390	intergenic_region	BOH78_0389-BOH78_0390	n.53532T>C
BOH78_Sc002	53842	C	T	downstream_gene_variant	MODIFIER				BOH78_0389	transcript	ONH77357	protein_coding	c.*312C>T	312	,T	intergenic_region	MODIFIER	BOH78_0389-BOH78_0390	BOH78_0389-BOH78_0390	intergenic_region	BOH78_0389-BOH78_0390	n.53842C>T
BOH78_Sc002	53693	C	T	downstream_gene_variant	MODIFIER				BOH78_0389	transcript	ONH77357	protein_coding	c.*163C>T	163	,T	intergenic_region	MODIFIER	BOH78_0389-BOH78_0390	BOH78_0389-BOH78_0390	intergenic_region	BOH78_0389-BOH78_0390	n.53693C>T
BOH78_Sc002	53668	A	G	downstream_gene_variant	MODIFIER				BOH78_0389	transcript	ONH77357	protein_coding	c.*138A>G	138	,G	intergenic_region	MODIFIER	BOH78_0389-BOH78_0390	BOH78_0389-BOH78_0390	intergenic_region	BOH78_0389-BOH78_0390	n.53668A>G
BOH78_Sc002	56318	G	A	downstream_gene_variant	MODIFIER				BOH78_0390	transcript	ONH77188	protein_coding	c.*321G>A	321	,A	intron_variant	MODIFIER	BOH78_0391	BOH78_0391	transcript	ONH77189	protein_coding	2023-01-01	c.680-148C>T
BOH78_Sc002	60112	A	C	downstream_gene_variant	MODIFIER				BOH78_0392	transcript	ONH77190	protein_coding	c.*81A>C	81	,C	downstream_gene_variant	MODIFIER	BOH78_0393	BOH78_0393	transcript	ONH77191	protein_coding	c.*111T>G	111	,C	intergenic_region	MODIFIER	BOH78_0392-BOH78_0393	BOH78_0392-BOH78_0393	intergenic_region	BOH78_0392-BOH78_0393	n.60112A>C
BOH78_Sc002	60180	G	T	downstream_gene_variant	MODIFIER				BOH78_0392	transcript	ONH77190	protein_coding	c.*149G>T	149	,T	downstream_gene_variant	MODIFIER	BOH78_0393	BOH78_0393	transcript	ONH77191	protein_coding	c.*43C>A	43	,T	intergenic_region	MODIFIER	BOH78_0392-BOH78_0393	BOH78_0392-BOH78_0393	intergenic_region	BOH78_0392-BOH78_0393	n.60180G>T
BOH78_Sc002	74466	G	A	downstream_gene_variant	MODIFIER				BOH78_0401	transcript	ONH77198	protein_coding	c.*2G>A	2	,A	downstream_gene_variant	MODIFIER	BOH78_0402	BOH78_0402	transcript	ONH77199	protein_coding	c.*47C>T	47	,A	intergenic_region	MODIFIER	BOH78_0401-BOH78_0402	BOH78_0401-BOH78_0402	intergenic_region	BOH78_0401-BOH78_0402	n.74466G>A
BOH78_Sc002	77269	G	A	downstream_gene_variant	MODIFIER				BOH78_0403	transcript	ONH77409	protein_coding	c.*27G>A	27	,A	downstream_gene_variant	MODIFIER	BOH78_0404	BOH78_0404	transcript	ONH77194	protein_coding	c.*159C>T	159	,A	intergenic_region	MODIFIER	BOH78_0403-BOH78_0404	BOH78_0403-BOH78_0404	intergenic_region	BOH78_0403-BOH78_0404	n.77269G>A
BOH78_Sc002	77335	A	C	downstream_gene_variant	MODIFIER				BOH78_0403	transcript	ONH77409	protein_coding	c.*93A>C	93	,C	downstream_gene_variant	MODIFIER	BOH78_0404	BOH78_0404	transcript	ONH77194	protein_coding	c.*93T>G	93	,C	intergenic_region	MODIFIER	BOH78_0403-BOH78_0404	BOH78_0403-BOH78_0404	intergenic_region	BOH78_0403-BOH78_0404	n.77335A>C
BOH78_Sc002	77405	T	A	downstream_gene_variant	MODIFIER				BOH78_0403	transcript	ONH77409	protein_coding	c.*163T>A	163	,A	downstream_gene_variant	MODIFIER	BOH78_0404	BOH78_0404	transcript	ONH77194	protein_coding	c.*23A>T	23	,A	intergenic_region	MODIFIER	BOH78_0403-BOH78_0404	BOH78_0403-BOH78_0404	intergenic_region	BOH78_0403-BOH78_0404	n.77405T>A
BOH78_Sc002	77280	T	C	downstream_gene_variant	MODIFIER				BOH78_0403	transcript	ONH77409	protein_coding	c.*38T>C	38	,C	downstream_gene_variant	MODIFIER	BOH78_0404	BOH78_0404	transcript	ONH77194	protein_coding	c.*148A>G	148	,C	intergenic_region	MODIFIER	BOH78_0403-BOH78_0404	BOH78_0403-BOH78_0404	intergenic_region	BOH78_0403-BOH78_0404	n.77280T>C
BOH78_Sc002	81152	A	T	downstream_gene_variant	MODIFIER				BOH78_0405	transcript	ONH77408	protein_coding	c.*452T>A	452	,T	intergenic_region	MODIFIER	BOH78_0404-BOH78_0405	BOH78_0404-BOH78_0405	intergenic_region	BOH78_0404-BOH78_0405	n.81152A>T
BOH78_Sc002	81139	G	T	downstream_gene_variant	MODIFIER				BOH78_0405	transcript	ONH77408	protein_coding	c.*465C>A	465	,T	intergenic_region	MODIFIER	BOH78_0404-BOH78_0405	BOH78_0404-BOH78_0405	intergenic_region	BOH78_0404-BOH78_0405	n.81139G>T
BOH78_Sc002	81391	A	C	downstream_gene_variant	MODIFIER				BOH78_0405	transcript	ONH77408	protein_coding	c.*213T>G	213	,C	intergenic_region	MODIFIER	BOH78_0404-BOH78_0405	BOH78_0404-BOH78_0405	intergenic_region	BOH78_0404-BOH78_0405	n.81391A>C
BOH78_Sc002	81374	C	T	downstream_gene_variant	MODIFIER				BOH78_0405	transcript	ONH77408	protein_coding	c.*230G>A	230	,T	intergenic_region	MODIFIER	BOH78_0404-BOH78_0405	BOH78_0404-BOH78_0405	intergenic_region	BOH78_0404-BOH78_0405	n.81374C>T
BOH78_Sc002	99129	C	T	downstream_gene_variant	MODIFIER				BOH78_0408	transcript	ONH77200	protein_coding	c.*37C>T	37	,T	downstream_gene_variant	MODIFIER	BOH78_0409	BOH78_0409	transcript	ONH77410	protein_coding	c.*85G>A	85	,T	intergenic_region	MODIFIER	BOH78_0408-BOH78_0409	BOH78_0408-BOH78_0409	intergenic_region	BOH78_0408-BOH78_0409	n.99129C>T
BOH78_Sc002	102954	C	G	downstream_gene_variant	MODIFIER				BOH78_0410	transcript	ONH77361	protein_coding	c.*85C>G	85	,G	downstream_gene_variant	MODIFIER	BOH78_0411	BOH78_0411	transcript	ONH77360	protein_coding	c.*37G>C	37	,G	intergenic_region	MODIFIER	BOH78_0410-BOH78_0411	BOH78_0410-BOH78_0411	intergenic_region	BOH78_0410-BOH78_0411	n.102954C>G
BOH78_Sc002	115263	C	T	downstream_gene_variant	MODIFIER				BOH78_0414	transcript	ONH77365	protein_coding	c.*453G>A	453	WARNING_TRANSCRIPT_NO_START_CODON,T	intergenic_region	MODIFIER	BOH78_0413-BOH78_0414	BOH78_0413-BOH78_0414	intergenic_region	BOH78_0413-BOH78_0414	n.115263C>T
BOH78_Sc002	115681	G	A	downstream_gene_variant	MODIFIER				BOH78_0414	transcript	ONH77365	protein_coding	c.*35C>T	35	WARNING_TRANSCRIPT_NO_START_CODON,A	intergenic_region	MODIFIER	BOH78_0413-BOH78_0414	BOH78_0413-BOH78_0414	intergenic_region	BOH78_0413-BOH78_0414	n.115681G>A
BOH78_Sc002	115611	G	A	downstream_gene_variant	MODIFIER				BOH78_0414	transcript	ONH77365	protein_coding	c.*105C>T	105	WARNING_TRANSCRIPT_NO_START_CODON,A	intergenic_region	MODIFIER	BOH78_0413-BOH78_0414	BOH78_0413-BOH78_0414	intergenic_region	BOH78_0413-BOH78_0414	n.115611G>A
BOH78_Sc002	115545	A	T	downstream_gene_variant	MODIFIER				BOH78_0414	transcript	ONH77365	protein_coding	c.*171T>A	171	WARNING_TRANSCRIPT_NO_START_CODON,T	intergenic_region	MODIFIER	BOH78_0413-BOH78_0414	BOH78_0413-BOH78_0414	intergenic_region	BOH78_0413-BOH78_0414	n.115545A>T
BOH78_Sc002	115221	A	G	downstream_gene_variant	MODIFIER				BOH78_0414	transcript	ONH77365	protein_coding	c.*495T>C	495	WARNING_TRANSCRIPT_NO_START_CODON,G	intergenic_region	MODIFIER	BOH78_0413-BOH78_0414	BOH78_0413-BOH78_0414	intergenic_region	BOH78_0413-BOH78_0414	n.115221A>G
BOH78_Sc002	127265	G	A	downstream_gene_variant	MODIFIER				BOH78_0418	transcript	ONH77367	protein_coding	c.*109G>A	109	,A	downstream_gene_variant	MODIFIER	BOH78_0419	BOH78_0419	transcript	ONH77366	protein_coding	c.*197C>T	197	,A	intergenic_region	MODIFIER	BOH78_0418-BOH78_0419	BOH78_0418-BOH78_0419	intergenic_region	BOH78_0418-BOH78_0419	n.127265G>A
BOH78_Sc002	127418	A	G	downstream_gene_variant	MODIFIER				BOH78_0418	transcript	ONH77367	protein_coding	c.*262A>G	262	,G	downstream_gene_variant	MODIFIER	BOH78_0419	BOH78_0419	transcript	ONH77366	protein_coding	c.*44T>C	44	,G	intergenic_region	MODIFIER	BOH78_0418-BOH78_0419	BOH78_0418-BOH78_0419	intergenic_region	BOH78_0418-BOH78_0419	n.127418A>G
BOH78_Sc002	130046	A	G	downstream_gene_variant	MODIFIER				BOH78_0420	transcript	ONH77182	protein_coding	c.*479T>C	479	,G	intergenic_region	MODIFIER	BOH78_0419-BOH78_0420	BOH78_0419-BOH78_0420	intergenic_region	BOH78_0419-BOH78_0420	n.130046A>G
BOH78_Sc002	130152	G	A	downstream_gene_variant	MODIFIER				BOH78_0420	transcript	ONH77182	protein_coding	c.*373C>T	373	,A	intergenic_region	MODIFIER	BOH78_0419-BOH78_0420	BOH78_0419-BOH78_0420	intergenic_region	BOH78_0419-BOH78_0420	n.130152G>A
BOH78_Sc002	130227	G	A	downstream_gene_variant	MODIFIER				BOH78_0420	transcript	ONH77182	protein_coding	c.*298C>T	298	,A	intergenic_region	MODIFIER	BOH78_0419-BOH78_0420	BOH78_0419-BOH78_0420	intergenic_region	BOH78_0419-BOH78_0420	n.130227G>A
BOH78_Sc002	130331	A	G	downstream_gene_variant	MODIFIER				BOH78_0420	transcript	ONH77182	protein_coding	c.*194T>C	194	,G	intergenic_region	MODIFIER	BOH78_0419-BOH78_0420	BOH78_0419-BOH78_0420	intergenic_region	BOH78_0419-BOH78_0420	n.130331A>G
BOH78_Sc002	130316	G	A	downstream_gene_variant	MODIFIER				BOH78_0420	transcript	ONH77182	protein_coding	c.*209C>T	209	,A	intergenic_region	MODIFIER	BOH78_0419-BOH78_0420	BOH78_0419-BOH78_0420	intergenic_region	BOH78_0419-BOH78_0420	n.130316G>A
BOH78_Sc002	130338	A	G	downstream_gene_variant	MODIFIER				BOH78_0420	transcript	ONH77182	protein_coding	c.*187T>C	187	,G	intergenic_region	MODIFIER	BOH78_0419-BOH78_0420	BOH78_0419-BOH78_0420	intergenic_region	BOH78_0419-BOH78_0420	n.130338A>G
BOH78_Sc002	130333	A	G	downstream_gene_variant	MODIFIER				BOH78_0420	transcript	ONH77182	protein_coding	c.*192T>C	192	,G	intergenic_region	MODIFIER	BOH78_0419-BOH78_0420	BOH78_0419-BOH78_0420	intergenic_region	BOH78_0419-BOH78_0420	n.130333A>G
BOH78_Sc002	162180	G	A	downstream_gene_variant	MODIFIER				BOH78_0431	transcript	ONH77346	protein_coding	c.*286G>A	286	,A	downstream_gene_variant	MODIFIER	BOH78_0432	BOH78_0432	transcript	ONH77349	protein_coding	c.*31C>T	31	,A	intergenic_region	MODIFIER	BOH78_0431-BOH78_0432	BOH78_0431-BOH78_0432	intergenic_region	BOH78_0431-BOH78_0432	n.162180G>A
BOH78_Sc002	168140	A	T	downstream_gene_variant	MODIFIER				BOH78_0434	transcript	ONH77343	protein_coding	c.*26T>A	26	,T	intergenic_region	MODIFIER	BOH78_0433-BOH78_0434	BOH78_0433-BOH78_0434	intergenic_region	BOH78_0433-BOH78_0434	n.168140A>T
BOH78_Sc002	168115	G	T	downstream_gene_variant	MODIFIER				BOH78_0434	transcript	ONH77343	protein_coding	c.*51C>A	51	,T	intergenic_region	MODIFIER	BOH78_0433-BOH78_0434	BOH78_0433-BOH78_0434	intergenic_region	BOH78_0433-BOH78_0434	n.168115G>T
BOH78_Sc002	175550	T	G	downstream_gene_variant	MODIFIER				BOH78_0436	transcript	ONH77345	protein_coding	c.*153T>G	153	,G	downstream_gene_variant	MODIFIER	BOH78_0437	BOH78_0437	transcript	ONH77344	protein_coding	c.*3A>C	3	,G	intergenic_region	MODIFIER	BOH78_0436-BOH78_0437	BOH78_0436-BOH78_0437	intergenic_region	BOH78_0436-BOH78_0437	n.175550T>G
BOH78_Sc002	175417	A	T	downstream_gene_variant	MODIFIER				BOH78_0436	transcript	ONH77345	protein_coding	c.*20A>T	20	,T	downstream_gene_variant	MODIFIER	BOH78_0437	BOH78_0437	transcript	ONH77344	protein_coding	c.*136T>A	136	,T	intergenic_region	MODIFIER	BOH78_0436-BOH78_0437	BOH78_0436-BOH78_0437	intergenic_region	BOH78_0436-BOH78_0437	n.175417A>T
BOH78_Sc002	175412	A	C	downstream_gene_variant	MODIFIER				BOH78_0436	transcript	ONH77345	protein_coding	c.*15A>C	15	,C	downstream_gene_variant	MODIFIER	BOH78_0437	BOH78_0437	transcript	ONH77344	protein_coding	c.*141T>G	141	,C	intergenic_region	MODIFIER	BOH78_0436-BOH78_0437	BOH78_0436-BOH78_0437	intergenic_region	BOH78_0436-BOH78_0437	n.175412A>C
BOH78_Sc002	187621	A	T	downstream_gene_variant	MODIFIER				BOH78_0441	transcript	ONH77167	protein_coding	c.*115A>T	115	,T	downstream_gene_variant	MODIFIER	BOH78_0442	BOH78_0442	transcript	ONH77168	protein_coding	c.*37T>A	37	,T	intergenic_region	MODIFIER	BOH78_0441-BOH78_0442	BOH78_0441-BOH78_0442	intergenic_region	BOH78_0441-BOH78_0442	n.187621A>T
BOH78_Sc002	187597	A	G	downstream_gene_variant	MODIFIER				BOH78_0441	transcript	ONH77167	protein_coding	c.*91A>G	91	,G	downstream_gene_variant	MODIFIER	BOH78_0442	BOH78_0442	transcript	ONH77168	protein_coding	c.*61T>C	61	,G	intergenic_region	MODIFIER	BOH78_0441-BOH78_0442	BOH78_0441-BOH78_0442	intergenic_region	BOH78_0441-BOH78_0442	n.187597A>G
BOH78_Sc002	187629	T	C	downstream_gene_variant	MODIFIER				BOH78_0441	transcript	ONH77167	protein_coding	c.*123T>C	123	,C	downstream_gene_variant	MODIFIER	BOH78_0442	BOH78_0442	transcript	ONH77168	protein_coding	c.*29A>G	29	,C	intergenic_region	MODIFIER	BOH78_0441-BOH78_0442	BOH78_0441-BOH78_0442	intergenic_region	BOH78_0441-BOH78_0442	n.187629T>C
BOH78_Sc002	187607	A	G	downstream_gene_variant	MODIFIER				BOH78_0441	transcript	ONH77167	protein_coding	c.*101A>G	101	,G	downstream_gene_variant	MODIFIER	BOH78_0442	BOH78_0442	transcript	ONH77168	protein_coding	c.*51T>C	51	,G	intergenic_region	MODIFIER	BOH78_0441-BOH78_0442	BOH78_0441-BOH78_0442	intergenic_region	BOH78_0441-BOH78_0442	n.187607A>G
BOH78_Sc002	190981	T	A	downstream_gene_variant	MODIFIER				BOH78_0443	transcript	ONH77169	protein_coding	c.*276T>A	276	,A	downstream_gene_variant	MODIFIER	BOH78_0444	BOH78_0444	transcript	ONH77170	protein_coding	c.*146A>T	146	,A	intergenic_region	MODIFIER	BOH78_0443-BOH78_0444	BOH78_0443-BOH78_0444	intergenic_region	BOH78_0443-BOH78_0444	n.190981T>A
BOH78_Sc002	191055	C	T	downstream_gene_variant	MODIFIER				BOH78_0443	transcript	ONH77169	protein_coding	c.*350C>T	350	,T	downstream_gene_variant	MODIFIER	BOH78_0444	BOH78_0444	transcript	ONH77170	protein_coding	c.*72G>A	72	,T	intergenic_region	MODIFIER	BOH78_0443-BOH78_0444	BOH78_0443-BOH78_0444	intergenic_region	BOH78_0443-BOH78_0444	n.191055C>T
BOH78_Sc002	191098	T	G	downstream_gene_variant	MODIFIER				BOH78_0443	transcript	ONH77169	protein_coding	c.*393T>G	393	,G	downstream_gene_variant	MODIFIER	BOH78_0444	BOH78_0444	transcript	ONH77170	protein_coding	c.*29A>C	29	,G	intergenic_region	MODIFIER	BOH78_0443-BOH78_0444	BOH78_0443-BOH78_0444	intergenic_region	BOH78_0443-BOH78_0444	n.191098T>G
BOH78_Sc002	193564	C	G	downstream_gene_variant	MODIFIER				BOH78_0445	transcript	ONH77171	protein_coding	c.*274G>C	274	,G	intergenic_region	MODIFIER	BOH78_0444-BOH78_0445	BOH78_0444-BOH78_0445	intergenic_region	BOH78_0444-BOH78_0445	n.193564C>G
BOH78_Sc002	193618	A	T	downstream_gene_variant	MODIFIER				BOH78_0445	transcript	ONH77171	protein_coding	c.*220T>A	220	,T	intergenic_region	MODIFIER	BOH78_0444-BOH78_0445	BOH78_0444-BOH78_0445	intergenic_region	BOH78_0444-BOH78_0445	n.193618A>T
BOH78_Sc002	193535	T	A	downstream_gene_variant	MODIFIER				BOH78_0445	transcript	ONH77171	protein_coding	c.*303A>T	303	,A	intergenic_region	MODIFIER	BOH78_0444-BOH78_0445	BOH78_0444-BOH78_0445	intergenic_region	BOH78_0444-BOH78_0445	n.193535T>A
BOH78_Sc002	203765	T	C	downstream_gene_variant	MODIFIER				BOH78_0449	transcript	ONH77165	protein_coding	c.*36A>G	36	,C	intergenic_region	MODIFIER	BOH78_0448-BOH78_0449	BOH78_0448-BOH78_0449	intergenic_region	BOH78_0448-BOH78_0449	n.203765T>C
BOH78_Sc002	203692	C	T	downstream_gene_variant	MODIFIER				BOH78_0449	transcript	ONH77165	protein_coding	c.*109G>A	109	,T	intergenic_region	MODIFIER	BOH78_0448-BOH78_0449	BOH78_0448-BOH78_0449	intergenic_region	BOH78_0448-BOH78_0449	n.203692C>T
BOH78_Sc002	206708	T	C	downstream_gene_variant	MODIFIER				BOH78_0451	transcript	ONH77336	protein_coding	c.*111T>C	111	,C	intergenic_region	MODIFIER	BOH78_0451-BOH78_0452	BOH78_0451-BOH78_0452	intergenic_region	BOH78_0451-BOH78_0452	n.206708T>C
BOH78_Sc002	208964	A	G	downstream_gene_variant	MODIFIER				BOH78_0453	transcript	ONH77334	protein_coding	c.*57A>G	57	,G	intergenic_region	MODIFIER	BOH78_0453-BOH78_0454	BOH78_0453-BOH78_0454	intergenic_region	BOH78_0453-BOH78_0454	n.208964A>G
BOH78_Sc002	208987	G	A	downstream_gene_variant	MODIFIER				BOH78_0453	transcript	ONH77334	protein_coding	c.*80G>A	80	,A	intergenic_region	MODIFIER	BOH78_0453-BOH78_0454	BOH78_0453-BOH78_0454	intergenic_region	BOH78_0453-BOH78_0454	n.208987G>A
BOH78_Sc002	209365	G	A	downstream_gene_variant	MODIFIER				BOH78_0453	transcript	ONH77334	protein_coding	c.*458G>A	458	,A	intergenic_region	MODIFIER	BOH78_0453-BOH78_0454	BOH78_0453-BOH78_0454	intergenic_region	BOH78_0453-BOH78_0454	n.209365G>A
BOH78_Sc002	209302	G	A	downstream_gene_variant	MODIFIER				BOH78_0453	transcript	ONH77334	protein_coding	c.*395G>A	395	,A	intergenic_region	MODIFIER	BOH78_0453-BOH78_0454	BOH78_0453-BOH78_0454	intergenic_region	BOH78_0453-BOH78_0454	n.209302G>A
BOH78_Sc002	217502	G	T	downstream_gene_variant	MODIFIER				BOH78_0455	transcript	ONH77332	protein_coding	c.*159G>T	159	,T	intergenic_region	MODIFIER	BOH78_0455-BOH78_0456	BOH78_0455-BOH78_0456	intergenic_region	BOH78_0455-BOH78_0456	n.217502G>T
BOH78_Sc002	224067	C	T	downstream_gene_variant	MODIFIER				BOH78_0459	transcript	ONH77338	protein_coding	c.*103G>A	103	,T	intergenic_region	MODIFIER	BOH78_0458-BOH78_0459	BOH78_0458-BOH78_0459	intergenic_region	BOH78_0458-BOH78_0459	n.224067C>T
BOH78_Sc002	224076	C	A	downstream_gene_variant	MODIFIER				BOH78_0459	transcript	ONH77338	protein_coding	c.*94G>T	94	,A	intergenic_region	MODIFIER	BOH78_0458-BOH78_0459	BOH78_0458-BOH78_0459	intergenic_region	BOH78_0458-BOH78_0459	n.224076C>A
BOH78_Sc002	231654	A	G	downstream_gene_variant	MODIFIER				BOH78_0461	transcript	ONH77156	protein_coding	c.*301A>G	301	,G	downstream_gene_variant	MODIFIER	BOH78_0462	BOH78_0462	transcript	ONH77153	protein_coding	c.*12T>C	12	,G	intergenic_region	MODIFIER	BOH78_0461-BOH78_0462	BOH78_0461-BOH78_0462	intergenic_region	BOH78_0461-BOH78_0462	n.231654A>G
BOH78_Sc002	235051	C	A	downstream_gene_variant	MODIFIER				BOH78_0463	transcript	ONH77154	protein_coding	c.*84G>T	84	,A	intergenic_region	MODIFIER	BOH78_0462-BOH78_0463	BOH78_0462-BOH78_0463	intergenic_region	BOH78_0462-BOH78_0463	n.235051C>A
BOH78_Sc002	234926	T	C	downstream_gene_variant	MODIFIER				BOH78_0463	transcript	ONH77154	protein_coding	c.*209A>G	209	,C	intergenic_region	MODIFIER	BOH78_0462-BOH78_0463	BOH78_0462-BOH78_0463	intergenic_region	BOH78_0462-BOH78_0463	n.234926T>C
BOH78_Sc002	234927	G	C	downstream_gene_variant	MODIFIER				BOH78_0463	transcript	ONH77154	protein_coding	c.*208C>G	208	,C	intergenic_region	MODIFIER	BOH78_0462-BOH78_0463	BOH78_0462-BOH78_0463	intergenic_region	BOH78_0462-BOH78_0463	n.234927G>C
BOH78_Sc002	234800	G	A	downstream_gene_variant	MODIFIER				BOH78_0463	transcript	ONH77154	protein_coding	c.*335C>T	335	,A	intergenic_region	MODIFIER	BOH78_0462-BOH78_0463	BOH78_0462-BOH78_0463	intergenic_region	BOH78_0462-BOH78_0463	n.234800G>A
BOH78_Sc002	258261	T	C	downstream_gene_variant	MODIFIER				BOH78_0473	transcript	ONH77322	protein_coding	c.*6T>C	6	,C	intergenic_region	MODIFIER	BOH78_0473-BOH78_0474	BOH78_0473-BOH78_0474	intergenic_region	BOH78_0473-BOH78_0474	n.258261T>C
BOH78_Sc002	258581	C	T	downstream_gene_variant	MODIFIER				BOH78_0473	transcript	ONH77322	protein_coding	c.*326C>T	326	,T	intergenic_region	MODIFIER	BOH78_0473-BOH78_0474	BOH78_0473-BOH78_0474	intergenic_region	BOH78_0473-BOH78_0474	n.258581C>T
BOH78_Sc002	258448	A	G	downstream_gene_variant	MODIFIER				BOH78_0473	transcript	ONH77322	protein_coding	c.*193A>G	193	,G	intergenic_region	MODIFIER	BOH78_0473-BOH78_0474	BOH78_0473-BOH78_0474	intergenic_region	BOH78_0473-BOH78_0474	n.258448A>G
BOH78_Sc002	258439	C	T	downstream_gene_variant	MODIFIER				BOH78_0473	transcript	ONH77322	protein_coding	c.*184C>T	184	,T	intergenic_region	MODIFIER	BOH78_0473-BOH78_0474	BOH78_0473-BOH78_0474	intergenic_region	BOH78_0473-BOH78_0474	n.258439C>T
BOH78_Sc002	258433	G	C	downstream_gene_variant	MODIFIER				BOH78_0473	transcript	ONH77322	protein_coding	c.*178G>C	178	,C	intergenic_region	MODIFIER	BOH78_0473-BOH78_0474	BOH78_0473-BOH78_0474	intergenic_region	BOH78_0473-BOH78_0474	n.258433G>C
BOH78_Sc002	261119	C	T	downstream_gene_variant	MODIFIER				BOH78_0475	transcript	ONH77324	protein_coding	c.*17C>T	17	,T	intergenic_region	MODIFIER	BOH78_0475-BOH78_0476	BOH78_0475-BOH78_0476	intergenic_region	BOH78_0475-BOH78_0476	n.261119C>T
BOH78_Sc002	263162	C	A	downstream_gene_variant	MODIFIER				BOH78_0476	transcript	ONH77327	protein_coding	c.*14C>A	14	,A	intergenic_region	MODIFIER	BOH78_0476-BOH78_0477	BOH78_0476-BOH78_0477	intergenic_region	BOH78_0476-BOH78_0477	n.263162C>A
BOH78_Sc002	266613	T	C	downstream_gene_variant	MODIFIER				BOH78_0478	transcript	ONH77329	protein_coding	c.*47T>C	47	,C	downstream_gene_variant	MODIFIER	BOH78_0479	BOH78_0479	transcript	ONH77328	protein_coding	c.*11A>G	11	,C	intergenic_region	MODIFIER	BOH78_0478-BOH78_0479	BOH78_0478-BOH78_0479	intergenic_region	BOH78_0478-BOH78_0479	n.266613T>C
BOH78_Sc002	273291	C	A	downstream_gene_variant	MODIFIER				BOH78_0483	transcript	ONH77152	protein_coding	c.*149G>T	149	,A	intergenic_region	MODIFIER	BOH78_0482-BOH78_0483	BOH78_0482-BOH78_0483	intergenic_region	BOH78_0482-BOH78_0483	n.273291C>A
BOH78_Sc002	273259	G	C	downstream_gene_variant	MODIFIER				BOH78_0483	transcript	ONH77152	protein_coding	c.*181C>G	181	,C	intergenic_region	MODIFIER	BOH78_0482-BOH78_0483	BOH78_0482-BOH78_0483	intergenic_region	BOH78_0482-BOH78_0483	n.273259G>C
BOH78_Sc002	273425	G	T	downstream_gene_variant	MODIFIER				BOH78_0483	transcript	ONH77152	protein_coding	c.*15C>A	15	,T	intergenic_region	MODIFIER	BOH78_0482-BOH78_0483	BOH78_0482-BOH78_0483	intergenic_region	BOH78_0482-BOH78_0483	n.273425G>T
BOH78_Sc002	273435	C	T	downstream_gene_variant	MODIFIER				BOH78_0483	transcript	ONH77152	protein_coding	c.*5G>A	5	,T	intergenic_region	MODIFIER	BOH78_0482-BOH78_0483	BOH78_0482-BOH78_0483	intergenic_region	BOH78_0482-BOH78_0483	n.273435C>T
BOH78_Sc002	273246	A	G	downstream_gene_variant	MODIFIER				BOH78_0483	transcript	ONH77152	protein_coding	c.*194T>C	194	,G	intergenic_region	MODIFIER	BOH78_0482-BOH78_0483	BOH78_0482-BOH78_0483	intergenic_region	BOH78_0482-BOH78_0483	n.273246A>G
BOH78_Sc002	273224	A	G	downstream_gene_variant	MODIFIER				BOH78_0483	transcript	ONH77152	protein_coding	c.*216T>C	216	,G	intergenic_region	MODIFIER	BOH78_0482-BOH78_0483	BOH78_0482-BOH78_0483	intergenic_region	BOH78_0482-BOH78_0483	n.273224A>G
BOH78_Sc002	275267	T	C	downstream_gene_variant	MODIFIER				BOH78_0484	transcript	ONH77145	protein_coding	c.*367T>C	367	WARNING_TRANSCRIPT_NO_START_CODON,C	intergenic_region	MODIFIER	BOH78_0484-BOH78_0485	BOH78_0484-BOH78_0485	intergenic_region	BOH78_0484-BOH78_0485	n.275267T>C
BOH78_Sc002	275247	A	G	downstream_gene_variant	MODIFIER				BOH78_0484	transcript	ONH77145	protein_coding	c.*347A>G	347	WARNING_TRANSCRIPT_NO_START_CODON,G	intergenic_region	MODIFIER	BOH78_0484-BOH78_0485	BOH78_0484-BOH78_0485	intergenic_region	BOH78_0484-BOH78_0485	n.275247A>G
BOH78_Sc002	275112	C	T	downstream_gene_variant	MODIFIER				BOH78_0484	transcript	ONH77145	protein_coding	c.*212C>T	212	WARNING_TRANSCRIPT_NO_START_CODON,T	intergenic_region	MODIFIER	BOH78_0484-BOH78_0485	BOH78_0484-BOH78_0485	intergenic_region	BOH78_0484-BOH78_0485	n.275112C>T
BOH78_Sc002	275265	T	C	downstream_gene_variant	MODIFIER				BOH78_0484	transcript	ONH77145	protein_coding	c.*365T>C	365	WARNING_TRANSCRIPT_NO_START_CODON,C	intergenic_region	MODIFIER	BOH78_0484-BOH78_0485	BOH78_0484-BOH78_0485	intergenic_region	BOH78_0484-BOH78_0485	n.275265T>C
BOH78_Sc002	275164	C	T	downstream_gene_variant	MODIFIER				BOH78_0484	transcript	ONH77145	protein_coding	c.*264C>T	264	WARNING_TRANSCRIPT_NO_START_CODON,T	intergenic_region	MODIFIER	BOH78_0484-BOH78_0485	BOH78_0484-BOH78_0485	intergenic_region	BOH78_0484-BOH78_0485	n.275164C>T
BOH78_Sc002	275157	A	G	downstream_gene_variant	MODIFIER				BOH78_0484	transcript	ONH77145	protein_coding	c.*257A>G	257	WARNING_TRANSCRIPT_NO_START_CODON,G	intergenic_region	MODIFIER	BOH78_0484-BOH78_0485	BOH78_0484-BOH78_0485	intergenic_region	BOH78_0484-BOH78_0485	n.275157A>G
BOH78_Sc002	275158	A	G	downstream_gene_variant	MODIFIER				BOH78_0484	transcript	ONH77145	protein_coding	c.*258A>G	258	WARNING_TRANSCRIPT_NO_START_CODON,G	intergenic_region	MODIFIER	BOH78_0484-BOH78_0485	BOH78_0484-BOH78_0485	intergenic_region	BOH78_0484-BOH78_0485	n.275158A>G
BOH78_Sc002	275868	T	A	downstream_gene_variant	MODIFIER				BOH78_0485	transcript	ONH77146	protein_coding	c.*10A>T	10	,A	intergenic_region	MODIFIER	BOH78_0484-BOH78_0485	BOH78_0484-BOH78_0485	intergenic_region	BOH78_0484-BOH78_0485	n.275868T>A
BOH78_Sc002	275782	A	G	downstream_gene_variant	MODIFIER				BOH78_0485	transcript	ONH77146	protein_coding	c.*96T>C	96	,G	intergenic_region	MODIFIER	BOH78_0484-BOH78_0485	BOH78_0484-BOH78_0485	intergenic_region	BOH78_0484-BOH78_0485	n.275782A>G
BOH78_Sc002	275537	A	G	downstream_gene_variant	MODIFIER				BOH78_0485	transcript	ONH77146	protein_coding	c.*341T>C	341	,G	intergenic_region	MODIFIER	BOH78_0484-BOH78_0485	BOH78_0484-BOH78_0485	intergenic_region	BOH78_0484-BOH78_0485	n.275537A>G
BOH78_Sc002	280894	G	A	downstream_gene_variant	MODIFIER				BOH78_0486	transcript	ONH77147	protein_coding	c.*170G>A	170	,A	downstream_gene_variant	MODIFIER	BOH78_0487	BOH78_0487	transcript	ONH77148	protein_coding	c.*28C>T	28	,A	intergenic_region	MODIFIER	BOH78_0486-BOH78_0487	BOH78_0486-BOH78_0487	intergenic_region	BOH78_0486-BOH78_0487	n.280894G>A
BOH78_Sc002	286377	G	A	downstream_gene_variant	MODIFIER				BOH78_0488	transcript	ONH77143	protein_coding	c.*391G>A	391	,A	intergenic_region	MODIFIER	BOH78_0488-BOH78_0489	BOH78_0488-BOH78_0489	intergenic_region	BOH78_0488-BOH78_0489	n.286377G>A
BOH78_Sc002	286414	G	A	downstream_gene_variant	MODIFIER				BOH78_0488	transcript	ONH77143	protein_coding	c.*428G>A	428	,A	intergenic_region	MODIFIER	BOH78_0488-BOH78_0489	BOH78_0488-BOH78_0489	intergenic_region	BOH78_0488-BOH78_0489	n.286414G>A
BOH78_Sc002	286082	C	T	downstream_gene_variant	MODIFIER				BOH78_0488	transcript	ONH77143	protein_coding	c.*96C>T	96	,T	intergenic_region	MODIFIER	BOH78_0488-BOH78_0489	BOH78_0488-BOH78_0489	intergenic_region	BOH78_0488-BOH78_0489	n.286082C>T
BOH78_Sc002	286351	T	G	downstream_gene_variant	MODIFIER				BOH78_0488	transcript	ONH77143	protein_coding	c.*365T>G	365	,G	intergenic_region	MODIFIER	BOH78_0488-BOH78_0489	BOH78_0488-BOH78_0489	intergenic_region	BOH78_0488-BOH78_0489	n.286351T>G
BOH78_Sc002	286234	C	T	downstream_gene_variant	MODIFIER				BOH78_0488	transcript	ONH77143	protein_coding	c.*248C>T	248	,T	intergenic_region	MODIFIER	BOH78_0488-BOH78_0489	BOH78_0488-BOH78_0489	intergenic_region	BOH78_0488-BOH78_0489	n.286234C>T
BOH78_Sc002	286125	G	A	downstream_gene_variant	MODIFIER				BOH78_0488	transcript	ONH77143	protein_coding	c.*139G>A	139	,A	intergenic_region	MODIFIER	BOH78_0488-BOH78_0489	BOH78_0488-BOH78_0489	intergenic_region	BOH78_0488-BOH78_0489	n.286125G>A
BOH78_Sc002	294888	C	T	downstream_gene_variant	MODIFIER				BOH78_0494	transcript	ONH77317	protein_coding	c.*107G>A	107	,T	intergenic_region	MODIFIER	BOH78_0493-BOH78_0494	BOH78_0493-BOH78_0494	intergenic_region	BOH78_0493-BOH78_0494	n.294888C>T
BOH78_Sc002	299412	A	G	downstream_gene_variant	MODIFIER				BOH78_0496	transcript	ONH77315	protein_coding	c.*41A>G	41	,G	downstream_gene_variant	MODIFIER	BOH78_0497	BOH78_0497	transcript	ONH77314	protein_coding	c.*138T>C	138	,G	intergenic_region	MODIFIER	BOH78_0496-BOH78_0497	BOH78_0496-BOH78_0497	intergenic_region	BOH78_0496-BOH78_0497	n.299412A>G
BOH78_Sc002	299531	G	A	downstream_gene_variant	MODIFIER				BOH78_0496	transcript	ONH77315	protein_coding	c.*160G>A	160	,A	downstream_gene_variant	MODIFIER	BOH78_0497	BOH78_0497	transcript	ONH77314	protein_coding	c.*19C>T	19	,A	intergenic_region	MODIFIER	BOH78_0496-BOH78_0497	BOH78_0496-BOH78_0497	intergenic_region	BOH78_0496-BOH78_0497	n.299531G>A
BOH78_Sc002	305075	G	A	downstream_gene_variant	MODIFIER				BOH78_0498	transcript	ONH77309	protein_coding	c.*39G>A	39	,A	intron_variant	MODIFIER	BOH78_0499	BOH78_0499	transcript	ONH77308	protein_coding	2023-01-01	c.1247-121C>T
BOH78_Sc002	326869	A	G	downstream_gene_variant	MODIFIER				BOH78_0509	transcript	ONH77113	protein_coding	c.*38A>G	38	,G	downstream_gene_variant	MODIFIER	BOH78_0510	BOH78_0510	transcript	ONH77286	protein_coding	c.*279T>C	279	,G	intergenic_region	MODIFIER	BOH78_0509-BOH78_0510	BOH78_0509-BOH78_0510	intergenic_region	BOH78_0509-BOH78_0510	n.326869A>G
BOH78_Sc002	327090	G	A	downstream_gene_variant	MODIFIER				BOH78_0509	transcript	ONH77113	protein_coding	c.*259G>A	259	,A	downstream_gene_variant	MODIFIER	BOH78_0510	BOH78_0510	transcript	ONH77286	protein_coding	c.*58C>T	58	,A	intergenic_region	MODIFIER	BOH78_0509-BOH78_0510	BOH78_0509-BOH78_0510	intergenic_region	BOH78_0509-BOH78_0510	n.327090G>A
BOH78_Sc002	326988	T	C	downstream_gene_variant	MODIFIER				BOH78_0509	transcript	ONH77113	protein_coding	c.*157T>C	157	,C	downstream_gene_variant	MODIFIER	BOH78_0510	BOH78_0510	transcript	ONH77286	protein_coding	c.*160A>G	160	,C	intergenic_region	MODIFIER	BOH78_0509-BOH78_0510	BOH78_0509-BOH78_0510	intergenic_region	BOH78_0509-BOH78_0510	n.326988T>C
BOH78_Sc002	327042	A	C	downstream_gene_variant	MODIFIER				BOH78_0509	transcript	ONH77113	protein_coding	c.*211A>C	211	,C	downstream_gene_variant	MODIFIER	BOH78_0510	BOH78_0510	transcript	ONH77286	protein_coding	c.*106T>G	106	,C	intergenic_region	MODIFIER	BOH78_0509-BOH78_0510	BOH78_0509-BOH78_0510	intergenic_region	BOH78_0509-BOH78_0510	n.327042A>C
BOH78_Sc002	331344	G	A	downstream_gene_variant	MODIFIER				BOH78_0512	transcript	ONH77284	protein_coding	c.*57G>A	57	,A	downstream_gene_variant	MODIFIER	BOH78_0513	BOH78_0513	transcript	ONH77285	protein_coding	c.*78C>T	78	,A	intergenic_region	MODIFIER	BOH78_0512-BOH78_0513	BOH78_0512-BOH78_0513	intergenic_region	BOH78_0512-BOH78_0513	n.331344G>A
BOH78_Sc002	334114	G	T	downstream_gene_variant	MODIFIER				BOH78_0514	transcript	ONH77282	protein_coding	c.*222C>A	222	,T	intergenic_region	MODIFIER	BOH78_0513-BOH78_0514	BOH78_0513-BOH78_0514	intergenic_region	BOH78_0513-BOH78_0514	n.334114G>T
BOH78_Sc002	334154	G	A	downstream_gene_variant	MODIFIER				BOH78_0514	transcript	ONH77282	protein_coding	c.*182C>T	182	,A	intergenic_region	MODIFIER	BOH78_0513-BOH78_0514	BOH78_0513-BOH78_0514	intergenic_region	BOH78_0513-BOH78_0514	n.334154G>A
BOH78_Sc002	334028	T	C	downstream_gene_variant	MODIFIER				BOH78_0514	transcript	ONH77282	protein_coding	c.*308A>G	308	,C	intergenic_region	MODIFIER	BOH78_0513-BOH78_0514	BOH78_0513-BOH78_0514	intergenic_region	BOH78_0513-BOH78_0514	n.334028T>C
BOH78_Sc002	334041	C	T	downstream_gene_variant	MODIFIER				BOH78_0514	transcript	ONH77282	protein_coding	c.*295G>A	295	,T	intergenic_region	MODIFIER	BOH78_0513-BOH78_0514	BOH78_0513-BOH78_0514	intergenic_region	BOH78_0513-BOH78_0514	n.334041C>T
BOH78_Sc002	334081	T	G	downstream_gene_variant	MODIFIER				BOH78_0514	transcript	ONH77282	protein_coding	c.*255A>C	255	,G	intergenic_region	MODIFIER	BOH78_0513-BOH78_0514	BOH78_0513-BOH78_0514	intergenic_region	BOH78_0513-BOH78_0514	n.334081T>G
BOH78_Sc002	336470	G	A	downstream_gene_variant	MODIFIER				BOH78_0515	transcript	ONH77283	protein_coding	c.*208C>T	208	,A	intergenic_region	MODIFIER	BOH78_0514-BOH78_0515	BOH78_0514-BOH78_0515	intergenic_region	BOH78_0514-BOH78_0515	n.336470G>A
BOH78_Sc002	336485	A	G	downstream_gene_variant	MODIFIER				BOH78_0515	transcript	ONH77283	protein_coding	c.*193T>C	193	,G	intergenic_region	MODIFIER	BOH78_0514-BOH78_0515	BOH78_0514-BOH78_0515	intergenic_region	BOH78_0514-BOH78_0515	n.336485A>G
BOH78_Sc002	336338	A	G	downstream_gene_variant	MODIFIER				BOH78_0515	transcript	ONH77283	protein_coding	c.*340T>C	340	,G	intergenic_region	MODIFIER	BOH78_0514-BOH78_0515	BOH78_0514-BOH78_0515	intergenic_region	BOH78_0514-BOH78_0515	n.336338A>G
BOH78_Sc002	336325	C	A	downstream_gene_variant	MODIFIER				BOH78_0515	transcript	ONH77283	protein_coding	c.*353G>T	353	,A	intergenic_region	MODIFIER	BOH78_0514-BOH78_0515	BOH78_0514-BOH78_0515	intergenic_region	BOH78_0514-BOH78_0515	n.336325C>A
BOH78_Sc002	349836	C	A	downstream_gene_variant	MODIFIER				BOH78_0521	transcript	ONH77135	protein_coding	c.*93C>A	93	,A	intergenic_region	MODIFIER	BOH78_0521-BOH78_0522	BOH78_0521-BOH78_0522	intergenic_region	BOH78_0521-BOH78_0522	n.349836C>A
BOH78_Sc002	353609	A	G	downstream_gene_variant	MODIFIER				BOH78_0522	transcript	ONH77134	protein_coding	c.*81A>G	81	,G	downstream_gene_variant	MODIFIER	BOH78_0523	BOH78_0523	transcript	ONH77133	protein_coding	c.*130T>C	130	,G	intergenic_region	MODIFIER	BOH78_0522-BOH78_0523	BOH78_0522-BOH78_0523	intergenic_region	BOH78_0522-BOH78_0523	n.353609A>G
BOH78_Sc002	367734	T	G	downstream_gene_variant	MODIFIER				BOH78_0528	transcript	ONH77142	protein_coding	c.*138T>G	138	,G	intergenic_region	MODIFIER	BOH78_0528-BOH78_0529	BOH78_0528-BOH78_0529	intergenic_region	BOH78_0528-BOH78_0529	n.367734T>G
BOH78_Sc002	368424	C	T	downstream_gene_variant	MODIFIER				BOH78_0529	transcript	ONH77141	protein_coding	c.*281G>A	281	,T	intergenic_region	MODIFIER	BOH78_0528-BOH78_0529	BOH78_0528-BOH78_0529	intergenic_region	BOH78_0528-BOH78_0529	n.368424C>T
BOH78_Sc002	368619	T	C	downstream_gene_variant	MODIFIER				BOH78_0529	transcript	ONH77141	protein_coding	c.*86A>G	86	,C	intergenic_region	MODIFIER	BOH78_0528-BOH78_0529	BOH78_0528-BOH78_0529	intergenic_region	BOH78_0528-BOH78_0529	n.368619T>C
BOH78_Sc002	373043	C	T	downstream_gene_variant	MODIFIER				BOH78_0531	transcript	ONH77303	protein_coding	c.*119C>T	119	,T	intergenic_region	MODIFIER	BOH78_0531-BOH78_0532	BOH78_0531-BOH78_0532	intergenic_region	BOH78_0531-BOH78_0532	n.373043C>T
BOH78_Sc002	373376	G	A	downstream_gene_variant	MODIFIER				BOH78_0531	transcript	ONH77303	protein_coding	c.*452G>A	452	,A	intergenic_region	MODIFIER	BOH78_0531-BOH78_0532	BOH78_0531-BOH78_0532	intergenic_region	BOH78_0531-BOH78_0532	n.373376G>A
BOH78_Sc002	377540	C	T	downstream_gene_variant	MODIFIER				BOH78_0534	transcript	ONH77298	protein_coding	c.*51C>T	51	,T	downstream_gene_variant	MODIFIER	BOH78_0535	BOH78_0535	transcript	ONH77299	protein_coding	c.*276G>A	276	,T	intergenic_region	MODIFIER	BOH78_0534-BOH78_0535	BOH78_0534-BOH78_0535	intergenic_region	BOH78_0534-BOH78_0535	n.377540C>T
BOH78_Sc002	391584	G	T	downstream_gene_variant	MODIFIER				BOH78_0539	transcript	ONH77307	protein_coding	c.*164G>T	164	,T	intergenic_region	MODIFIER	BOH78_0539-BOH78_0540	BOH78_0539-BOH78_0540	intergenic_region	BOH78_0539-BOH78_0540	n.391584G>T
BOH78_Sc002	391476	T	A	downstream_gene_variant	MODIFIER				BOH78_0539	transcript	ONH77307	protein_coding	c.*56T>A	56	,A	intergenic_region	MODIFIER	BOH78_0539-BOH78_0540	BOH78_0539-BOH78_0540	intergenic_region	BOH78_0539-BOH78_0540	n.391476T>A
BOH78_Sc002	391834	T	C	downstream_gene_variant	MODIFIER				BOH78_0539	transcript	ONH77307	protein_coding	c.*414T>C	414	,C	intergenic_region	MODIFIER	BOH78_0539-BOH78_0540	BOH78_0539-BOH78_0540	intergenic_region	BOH78_0539-BOH78_0540	n.391834T>C
BOH78_Sc002	391724	G	C	downstream_gene_variant	MODIFIER				BOH78_0539	transcript	ONH77307	protein_coding	c.*304G>C	304	,C	intergenic_region	MODIFIER	BOH78_0539-BOH78_0540	BOH78_0539-BOH78_0540	intergenic_region	BOH78_0539-BOH78_0540	n.391724G>C
BOH78_Sc002	391873	T	C	downstream_gene_variant	MODIFIER				BOH78_0539	transcript	ONH77307	protein_coding	c.*453T>C	453	,C	intergenic_region	MODIFIER	BOH78_0539-BOH78_0540	BOH78_0539-BOH78_0540	intergenic_region	BOH78_0539-BOH78_0540	n.391873T>C
BOH78_Sc002	391878	C	T	downstream_gene_variant	MODIFIER				BOH78_0539	transcript	ONH77307	protein_coding	c.*458C>T	458	,T	intergenic_region	MODIFIER	BOH78_0539-BOH78_0540	BOH78_0539-BOH78_0540	intergenic_region	BOH78_0539-BOH78_0540	n.391878C>T
BOH78_Sc002	391687	A	G	downstream_gene_variant	MODIFIER				BOH78_0539	transcript	ONH77307	protein_coding	c.*267A>G	267	,G	intergenic_region	MODIFIER	BOH78_0539-BOH78_0540	BOH78_0539-BOH78_0540	intergenic_region	BOH78_0539-BOH78_0540	n.391687A>G
BOH78_Sc002	391679	G	T	downstream_gene_variant	MODIFIER				BOH78_0539	transcript	ONH77307	protein_coding	c.*259G>T	259	,T	intergenic_region	MODIFIER	BOH78_0539-BOH78_0540	BOH78_0539-BOH78_0540	intergenic_region	BOH78_0539-BOH78_0540	n.391679G>T
BOH78_Sc002	391631	T	C	downstream_gene_variant	MODIFIER				BOH78_0539	transcript	ONH77307	protein_coding	c.*211T>C	211	,C	intergenic_region	MODIFIER	BOH78_0539-BOH78_0540	BOH78_0539-BOH78_0540	intergenic_region	BOH78_0539-BOH78_0540	n.391631T>C
BOH78_Sc002	399975	T	C	downstream_gene_variant	MODIFIER				BOH78_0541	transcript	ONH77083	protein_coding	c.*61T>C	61	,C	downstream_gene_variant	MODIFIER	BOH78_0542	BOH78_0542	transcript	ONH77086	protein_coding	c.*88A>G	88	,C	intergenic_region	MODIFIER	BOH78_0541-BOH78_0542	BOH78_0541-BOH78_0542	intergenic_region	BOH78_0541-BOH78_0542	n.399975T>C
BOH78_Sc002	400005	T	A	downstream_gene_variant	MODIFIER				BOH78_0541	transcript	ONH77083	protein_coding	c.*91T>A	91	,A	downstream_gene_variant	MODIFIER	BOH78_0542	BOH78_0542	transcript	ONH77086	protein_coding	c.*58A>T	58	,A	intergenic_region	MODIFIER	BOH78_0541-BOH78_0542	BOH78_0541-BOH78_0542	intergenic_region	BOH78_0541-BOH78_0542	n.400005T>A
BOH78_Sc002	401927	G	A	downstream_gene_variant	MODIFIER				BOH78_0543	transcript	ONH77085	protein_coding	c.*216C>T	216	,A	intergenic_region	MODIFIER	BOH78_0542-BOH78_0543	BOH78_0542-BOH78_0543	intergenic_region	BOH78_0542-BOH78_0543	n.401927G>A
BOH78_Sc002	402033	C	A	downstream_gene_variant	MODIFIER				BOH78_0543	transcript	ONH77085	protein_coding	c.*110G>T	110	,A	intergenic_region	MODIFIER	BOH78_0542-BOH78_0543	BOH78_0542-BOH78_0543	intergenic_region	BOH78_0542-BOH78_0543	n.402033C>A
BOH78_Sc002	401941	G	C	downstream_gene_variant	MODIFIER				BOH78_0543	transcript	ONH77085	protein_coding	c.*202C>G	202	,C	intergenic_region	MODIFIER	BOH78_0542-BOH78_0543	BOH78_0542-BOH78_0543	intergenic_region	BOH78_0542-BOH78_0543	n.401941G>C
BOH78_Sc002	401658	A	G	downstream_gene_variant	MODIFIER				BOH78_0543	transcript	ONH77085	protein_coding	c.*485T>C	485	,G	intergenic_region	MODIFIER	BOH78_0542-BOH78_0543	BOH78_0542-BOH78_0543	intergenic_region	BOH78_0542-BOH78_0543	n.401658A>G
BOH78_Sc002	401725	A	G	downstream_gene_variant	MODIFIER				BOH78_0543	transcript	ONH77085	protein_coding	c.*418T>C	418	,G	intergenic_region	MODIFIER	BOH78_0542-BOH78_0543	BOH78_0542-BOH78_0543	intergenic_region	BOH78_0542-BOH78_0543	n.401725A>G
BOH78_Sc002	401766	C	G	downstream_gene_variant	MODIFIER				BOH78_0543	transcript	ONH77085	protein_coding	c.*377G>C	377	,G	intergenic_region	MODIFIER	BOH78_0542-BOH78_0543	BOH78_0542-BOH78_0543	intergenic_region	BOH78_0542-BOH78_0543	n.401766C>G
BOH78_Sc002	401778	G	T	downstream_gene_variant	MODIFIER				BOH78_0543	transcript	ONH77085	protein_coding	c.*365C>A	365	,T	intergenic_region	MODIFIER	BOH78_0542-BOH78_0543	BOH78_0542-BOH78_0543	intergenic_region	BOH78_0542-BOH78_0543	n.401778G>T
BOH78_Sc002	404040	G	A	downstream_gene_variant	MODIFIER				BOH78_0544	transcript	ONH77088	protein_coding	c.*22C>T	22	,A	intergenic_region	MODIFIER	BOH78_0543-BOH78_0544	BOH78_0543-BOH78_0544	intergenic_region	BOH78_0543-BOH78_0544	n.404040G>A
BOH78_Sc002	403774	G	A	downstream_gene_variant	MODIFIER				BOH78_0544	transcript	ONH77088	protein_coding	c.*288C>T	288	,A	intergenic_region	MODIFIER	BOH78_0543-BOH78_0544	BOH78_0543-BOH78_0544	intergenic_region	BOH78_0543-BOH78_0544	n.403774G>A
BOH78_Sc002	403924	T	C	downstream_gene_variant	MODIFIER				BOH78_0544	transcript	ONH77088	protein_coding	c.*138A>G	138	,C	intergenic_region	MODIFIER	BOH78_0543-BOH78_0544	BOH78_0543-BOH78_0544	intergenic_region	BOH78_0543-BOH78_0544	n.403924T>C
BOH78_Sc002	403813	T	C	downstream_gene_variant	MODIFIER				BOH78_0544	transcript	ONH77088	protein_coding	c.*249A>G	249	,C	intergenic_region	MODIFIER	BOH78_0543-BOH78_0544	BOH78_0543-BOH78_0544	intergenic_region	BOH78_0543-BOH78_0544	n.403813T>C
BOH78_Sc002	403912	G	A	downstream_gene_variant	MODIFIER				BOH78_0544	transcript	ONH77088	protein_coding	c.*150C>T	150	,A	intergenic_region	MODIFIER	BOH78_0543-BOH78_0544	BOH78_0543-BOH78_0544	intergenic_region	BOH78_0543-BOH78_0544	n.403912G>A
BOH78_Sc002	403865	C	G	downstream_gene_variant	MODIFIER				BOH78_0544	transcript	ONH77088	protein_coding	c.*197G>C	197	,G	intergenic_region	MODIFIER	BOH78_0543-BOH78_0544	BOH78_0543-BOH78_0544	intergenic_region	BOH78_0543-BOH78_0544	n.403865C>G
BOH78_Sc002	403876	C	A	downstream_gene_variant	MODIFIER				BOH78_0544	transcript	ONH77088	protein_coding	c.*186G>T	186	,A	intergenic_region	MODIFIER	BOH78_0543-BOH78_0544	BOH78_0543-BOH78_0544	intergenic_region	BOH78_0543-BOH78_0544	n.403876C>A
BOH78_Sc002	403837	C	T	downstream_gene_variant	MODIFIER				BOH78_0544	transcript	ONH77088	protein_coding	c.*225G>A	225	,T	intergenic_region	MODIFIER	BOH78_0543-BOH78_0544	BOH78_0543-BOH78_0544	intergenic_region	BOH78_0543-BOH78_0544	n.403837C>T
BOH78_Sc002	407603	C	T	downstream_gene_variant	MODIFIER				BOH78_0548	transcript	ONH77092	protein_coding	c.*15C>T	15	,T	downstream_gene_variant	MODIFIER	BOH78_0549	BOH78_0549	transcript	ONH77091	protein_coding	c.*69G>A	69	,T	intergenic_region	MODIFIER	BOH78_0548-BOH78_0549	BOH78_0548-BOH78_0549	intergenic_region	BOH78_0548-BOH78_0549	n.407603C>T
BOH78_Sc002	409818	A	G	downstream_gene_variant	MODIFIER				BOH78_0551	transcript	ONH77261	protein_coding	c.*124T>C	124	WARNING_TRANSCRIPT_NO_STOP_CODON,G	intergenic_region	MODIFIER	BOH78_0550-BOH78_0551	BOH78_0550-BOH78_0551	intergenic_region	BOH78_0550-BOH78_0551	n.409818A>G
BOH78_Sc002	409906	C	T	downstream_gene_variant	MODIFIER				BOH78_0551	transcript	ONH77261	protein_coding	c.*36G>A	36	WARNING_TRANSCRIPT_NO_STOP_CODON,T	intergenic_region	MODIFIER	BOH78_0550-BOH78_0551	BOH78_0550-BOH78_0551	intergenic_region	BOH78_0550-BOH78_0551	n.409906C>T
BOH78_Sc002	418057	T	C	downstream_gene_variant	MODIFIER				BOH78_0553	transcript	ONH77259	protein_coding	c.*3T>C	3	,C	downstream_gene_variant	MODIFIER	BOH78_0554	BOH78_0554	transcript	ONH77264	protein_coding	c.*115A>G	115	,C	intergenic_region	MODIFIER	BOH78_0553-BOH78_0554	BOH78_0553-BOH78_0554	intergenic_region	BOH78_0553-BOH78_0554	n.418057T>C
BOH78_Sc002	418098	T	C	downstream_gene_variant	MODIFIER				BOH78_0553	transcript	ONH77259	protein_coding	c.*44T>C	44	,C	downstream_gene_variant	MODIFIER	BOH78_0554	BOH78_0554	transcript	ONH77264	protein_coding	c.*74A>G	74	,C	intergenic_region	MODIFIER	BOH78_0553-BOH78_0554	BOH78_0553-BOH78_0554	intergenic_region	BOH78_0553-BOH78_0554	n.418098T>C
BOH78_Sc002	418062	C	G	downstream_gene_variant	MODIFIER				BOH78_0553	transcript	ONH77259	protein_coding	c.*8C>G	8	,G	downstream_gene_variant	MODIFIER	BOH78_0554	BOH78_0554	transcript	ONH77264	protein_coding	c.*110G>C	110	,G	intergenic_region	MODIFIER	BOH78_0553-BOH78_0554	BOH78_0553-BOH78_0554	intergenic_region	BOH78_0553-BOH78_0554	n.418062C>G
BOH78_Sc002	423303	T	C	downstream_gene_variant	MODIFIER				BOH78_0556	transcript	ONH77262	protein_coding	c.*352T>C	352	,C	intergenic_region	MODIFIER	BOH78_0556-BOH78_0557	BOH78_0556-BOH78_0557	intergenic_region	BOH78_0556-BOH78_0557	n.423303T>C
BOH78_Sc002	423155	G	T	downstream_gene_variant	MODIFIER				BOH78_0556	transcript	ONH77262	protein_coding	c.*204G>T	204	,T	intergenic_region	MODIFIER	BOH78_0556-BOH78_0557	BOH78_0556-BOH78_0557	intergenic_region	BOH78_0556-BOH78_0557	n.423155G>T
BOH78_Sc002	423200	T	C	downstream_gene_variant	MODIFIER				BOH78_0556	transcript	ONH77262	protein_coding	c.*249T>C	249	,C	intergenic_region	MODIFIER	BOH78_0556-BOH78_0557	BOH78_0556-BOH78_0557	intergenic_region	BOH78_0556-BOH78_0557	n.423200T>C
BOH78_Sc002	423291	T	A	downstream_gene_variant	MODIFIER				BOH78_0556	transcript	ONH77262	protein_coding	c.*340T>A	340	,A	intergenic_region	MODIFIER	BOH78_0556-BOH78_0557	BOH78_0556-BOH78_0557	intergenic_region	BOH78_0556-BOH78_0557	n.423291T>A
BOH78_Sc002	423292	T	A	downstream_gene_variant	MODIFIER				BOH78_0556	transcript	ONH77262	protein_coding	c.*341T>A	341	,A	intergenic_region	MODIFIER	BOH78_0556-BOH78_0557	BOH78_0556-BOH78_0557	intergenic_region	BOH78_0556-BOH78_0557	n.423292T>A
BOH78_Sc002	423407	C	T	downstream_gene_variant	MODIFIER				BOH78_0556	transcript	ONH77262	protein_coding	c.*456C>T	456	,T	intergenic_region	MODIFIER	BOH78_0556-BOH78_0557	BOH78_0556-BOH78_0557	intergenic_region	BOH78_0556-BOH78_0557	n.423407C>T
BOH78_Sc002	431682	A	C	downstream_gene_variant	MODIFIER				BOH78_0557	transcript	ONH77263	protein_coding	c.*490A>C	490	,C	intergenic_region	MODIFIER	BOH78_0557-BOH78_0558	BOH78_0557-BOH78_0558	intergenic_region	BOH78_0557-BOH78_0558	n.431682A>C
BOH78_Sc002	431224	T	C	downstream_gene_variant	MODIFIER				BOH78_0557	transcript	ONH77263	protein_coding	c.*32T>C	32	,C	intergenic_region	MODIFIER	BOH78_0557-BOH78_0558	BOH78_0557-BOH78_0558	intergenic_region	BOH78_0557-BOH78_0558	n.431224T>C
BOH78_Sc002	431463	C	A	downstream_gene_variant	MODIFIER				BOH78_0557	transcript	ONH77263	protein_coding	c.*271C>A	271	,A	intergenic_region	MODIFIER	BOH78_0557-BOH78_0558	BOH78_0557-BOH78_0558	intergenic_region	BOH78_0557-BOH78_0558	n.431463C>A
BOH78_Sc002	431391	A	C	downstream_gene_variant	MODIFIER				BOH78_0557	transcript	ONH77263	protein_coding	c.*199A>C	199	,C	intergenic_region	MODIFIER	BOH78_0557-BOH78_0558	BOH78_0557-BOH78_0558	intergenic_region	BOH78_0557-BOH78_0558	n.431391A>C
BOH78_Sc002	431612	A	T	downstream_gene_variant	MODIFIER				BOH78_0557	transcript	ONH77263	protein_coding	c.*420A>T	420	,T	intergenic_region	MODIFIER	BOH78_0557-BOH78_0558	BOH78_0557-BOH78_0558	intergenic_region	BOH78_0557-BOH78_0558	n.431612A>T
BOH78_Sc002	433358	C	T	downstream_gene_variant	MODIFIER				BOH78_0558	transcript	ONH77266	protein_coding	c.*76C>T	76	,T	intergenic_region	MODIFIER	BOH78_0558-BOH78_0559	BOH78_0558-BOH78_0559	intergenic_region	BOH78_0558-BOH78_0559	n.433358C>T
BOH78_Sc002	436121	C	T	downstream_gene_variant	MODIFIER				BOH78_0559	transcript	ONH77267	protein_coding	c.*187C>T	187	,T	downstream_gene_variant	MODIFIER	BOH78_0560	BOH78_0560	transcript	ONH77110	protein_coding	c.*74G>A	74	,T	intergenic_region	MODIFIER	BOH78_0559-BOH78_0560	BOH78_0559-BOH78_0560	intergenic_region	BOH78_0559-BOH78_0560	n.436121C>T
BOH78_Sc002	436133	T	C	downstream_gene_variant	MODIFIER				BOH78_0559	transcript	ONH77267	protein_coding	c.*199T>C	199	,C	downstream_gene_variant	MODIFIER	BOH78_0560	BOH78_0560	transcript	ONH77110	protein_coding	c.*62A>G	62	,C	intergenic_region	MODIFIER	BOH78_0559-BOH78_0560	BOH78_0559-BOH78_0560	intergenic_region	BOH78_0559-BOH78_0560	n.436133T>C
BOH78_Sc002	436017	T	C	downstream_gene_variant	MODIFIER				BOH78_0559	transcript	ONH77267	protein_coding	c.*83T>C	83	,C	downstream_gene_variant	MODIFIER	BOH78_0560	BOH78_0560	transcript	ONH77110	protein_coding	c.*178A>G	178	,C	intergenic_region	MODIFIER	BOH78_0559-BOH78_0560	BOH78_0559-BOH78_0560	intergenic_region	BOH78_0559-BOH78_0560	n.436017T>C
BOH78_Sc002	436076	A	T	downstream_gene_variant	MODIFIER				BOH78_0559	transcript	ONH77267	protein_coding	c.*142A>T	142	,T	downstream_gene_variant	MODIFIER	BOH78_0560	BOH78_0560	transcript	ONH77110	protein_coding	c.*119T>A	119	,T	intergenic_region	MODIFIER	BOH78_0559-BOH78_0560	BOH78_0559-BOH78_0560	intergenic_region	BOH78_0559-BOH78_0560	n.436076A>T
BOH78_Sc002	444786	T	G	downstream_gene_variant	MODIFIER				BOH78_0562	transcript	ONH77108	protein_coding	c.*232T>G	232	,G	intergenic_region	MODIFIER	BOH78_0562-BOH78_0563	BOH78_0562-BOH78_0563	intergenic_region	BOH78_0562-BOH78_0563	n.444786T>G
BOH78_Sc002	444654	G	A	downstream_gene_variant	MODIFIER				BOH78_0562	transcript	ONH77108	protein_coding	c.*100G>A	100	,A	intergenic_region	MODIFIER	BOH78_0562-BOH78_0563	BOH78_0562-BOH78_0563	intergenic_region	BOH78_0562-BOH78_0563	n.444654G>A
BOH78_Sc002	447230	A	G	downstream_gene_variant	MODIFIER				BOH78_0563	transcript	ONH77107	protein_coding	c.*136A>G	136	,G	intergenic_region	MODIFIER	BOH78_0563-BOH78_0564	BOH78_0563-BOH78_0564	intergenic_region	BOH78_0563-BOH78_0564	n.447230A>G
BOH78_Sc002	447113	C	T	downstream_gene_variant	MODIFIER				BOH78_0563	transcript	ONH77107	protein_coding	c.*19C>T	19	,T	intergenic_region	MODIFIER	BOH78_0563-BOH78_0564	BOH78_0563-BOH78_0564	intergenic_region	BOH78_0563-BOH78_0564	n.447113C>T
BOH78_Sc002	456973	A	G	downstream_gene_variant	MODIFIER				BOH78_0567	transcript	ONH77103	protein_coding	c.*37A>G	37	,G	downstream_gene_variant	MODIFIER	BOH78_0568	BOH78_0568	transcript	ONH77112	protein_coding	c.*36T>C	36	,G	intergenic_region	MODIFIER	BOH78_0567-BOH78_0568	BOH78_0567-BOH78_0568	intergenic_region	BOH78_0567-BOH78_0568	n.456973A>G
BOH78_Sc002	463697	G	T	downstream_gene_variant	MODIFIER				BOH78_0571	transcript	ONH77271	protein_coding	c.*438G>T	438	,T	intergenic_region	MODIFIER	BOH78_0571-BOH78_0572	BOH78_0571-BOH78_0572	intergenic_region	BOH78_0571-BOH78_0572	n.463697G>T
BOH78_Sc002	463549	G	T	downstream_gene_variant	MODIFIER				BOH78_0571	transcript	ONH77271	protein_coding	c.*290G>T	290	,T	intergenic_region	MODIFIER	BOH78_0571-BOH78_0572	BOH78_0571-BOH78_0572	intergenic_region	BOH78_0571-BOH78_0572	n.463549G>T
BOH78_Sc002	463726	T	A	downstream_gene_variant	MODIFIER				BOH78_0571	transcript	ONH77271	protein_coding	c.*467T>A	467	,A	intergenic_region	MODIFIER	BOH78_0571-BOH78_0572	BOH78_0571-BOH78_0572	intergenic_region	BOH78_0571-BOH78_0572	n.463726T>A
BOH78_Sc002	463740	G	A	downstream_gene_variant	MODIFIER				BOH78_0571	transcript	ONH77271	protein_coding	c.*481G>A	481	,A	intergenic_region	MODIFIER	BOH78_0571-BOH78_0572	BOH78_0571-BOH78_0572	intergenic_region	BOH78_0571-BOH78_0572	n.463740G>A
BOH78_Sc002	463569	C	T	downstream_gene_variant	MODIFIER				BOH78_0571	transcript	ONH77271	protein_coding	c.*310C>T	310	,T	intergenic_region	MODIFIER	BOH78_0571-BOH78_0572	BOH78_0571-BOH78_0572	intergenic_region	BOH78_0571-BOH78_0572	n.463569C>T
BOH78_Sc002	463339	A	G	downstream_gene_variant	MODIFIER				BOH78_0571	transcript	ONH77271	protein_coding	c.*80A>G	80	,G	intergenic_region	MODIFIER	BOH78_0571-BOH78_0572	BOH78_0571-BOH78_0572	intergenic_region	BOH78_0571-BOH78_0572	n.463339A>G
BOH78_Sc002	463347	T	C	downstream_gene_variant	MODIFIER				BOH78_0571	transcript	ONH77271	protein_coding	c.*88T>C	88	,C	intergenic_region	MODIFIER	BOH78_0571-BOH78_0572	BOH78_0571-BOH78_0572	intergenic_region	BOH78_0571-BOH78_0572	n.463347T>C
BOH78_Sc002	473287	G	A	downstream_gene_variant	MODIFIER				BOH78_0578	transcript	ONH77268	protein_coding	c.*112G>A	112	,A	intergenic_region	MODIFIER	BOH78_0578-BOH78_0579	BOH78_0578-BOH78_0579	intergenic_region	BOH78_0578-BOH78_0579	n.473287G>A
BOH78_Sc002	473415	A	G	downstream_gene_variant	MODIFIER				BOH78_0578	transcript	ONH77268	protein_coding	c.*240A>G	240	,G	downstream_gene_variant	MODIFIER	BOH78_0579	BOH78_0579	transcript	ONH77269	protein_coding	c.*488T>C	488	,G	intergenic_region	MODIFIER	BOH78_0578-BOH78_0579	BOH78_0578-BOH78_0579	intergenic_region	BOH78_0578-BOH78_0579	n.473415A>G
BOH78_Sc002	481249	A	C	downstream_gene_variant	MODIFIER				BOH78_0582	transcript	ONH77395	protein_coding	c.*24A>C	24	,C	intergenic_region	MODIFIER	BOH78_0582-BOH78_0583	BOH78_0582-BOH78_0583	intergenic_region	BOH78_0582-BOH78_0583	n.481249A>C
BOH78_Sc002	488377	A	G	downstream_gene_variant	MODIFIER				BOH78_0584	transcript	ONH77389	protein_coding	c.*81A>G	81	,G	intergenic_region	MODIFIER	BOH78_0584-BOH78_0585	BOH78_0584-BOH78_0585	intergenic_region	BOH78_0584-BOH78_0585	n.488377A>G
BOH78_Sc002	496520	G	A	downstream_gene_variant	MODIFIER				BOH78_0588	transcript	ONH77397	protein_coding	c.*34C>T	34	,A	intergenic_region	MODIFIER	BOH78_0587-BOH78_0588	BOH78_0587-BOH78_0588	intergenic_region	BOH78_0587-BOH78_0588	n.496520G>A
BOH78_Sc002	508219	G	T	downstream_gene_variant	MODIFIER				BOH78_0591	transcript	ONH77228	protein_coding	c.*57G>T	57	,T	downstream_gene_variant	MODIFIER	BOH78_0592	BOH78_0592	transcript	ONH77225	protein_coding	c.*39C>A	39	,T	intergenic_region	MODIFIER	BOH78_0591-BOH78_0592	BOH78_0591-BOH78_0592	intergenic_region	BOH78_0591-BOH78_0592	n.508219G>T
BOH78_Sc002	512486	T	C	downstream_gene_variant	MODIFIER				BOH78_0596	transcript	ONH77221	protein_coding	c.*5T>C	5	,C	downstream_gene_variant	MODIFIER	BOH78_0597	BOH78_0597	transcript	ONH77222	protein_coding	c.*180A>G	180	,C	intergenic_region	MODIFIER	BOH78_0596-BOH78_0597	BOH78_0596-BOH78_0597	intergenic_region	BOH78_0596-BOH78_0597	n.512486T>C
BOH78_Sc002	512638	C	T	downstream_gene_variant	MODIFIER				BOH78_0596	transcript	ONH77221	protein_coding	c.*157C>T	157	,T	downstream_gene_variant	MODIFIER	BOH78_0597	BOH78_0597	transcript	ONH77222	protein_coding	c.*28G>A	28	,T	intergenic_region	MODIFIER	BOH78_0596-BOH78_0597	BOH78_0596-BOH78_0597	intergenic_region	BOH78_0596-BOH78_0597	n.512638C>T
BOH78_Sc002	512656	G	A	downstream_gene_variant	MODIFIER				BOH78_0596	transcript	ONH77221	protein_coding	c.*175G>A	175	,A	downstream_gene_variant	MODIFIER	BOH78_0597	BOH78_0597	transcript	ONH77222	protein_coding	c.*10C>T	10	,A	intergenic_region	MODIFIER	BOH78_0596-BOH78_0597	BOH78_0596-BOH78_0597	intergenic_region	BOH78_0596-BOH78_0597	n.512656G>A
BOH78_Sc002	514243	G	T,A	downstream_gene_variant	MODIFIER				BOH78_0598	transcript	ONH77229	protein_coding	c.*118G>A	118	,T	downstream_gene_variant	MODIFIER	BOH78_0598	BOH78_0598	transcript	ONH77229	protein_coding	c.*118G>T	118	,A	intergenic_region	MODIFIER	BOH78_0598-BOH78_0599	BOH78_0598-BOH78_0599	intergenic_region	BOH78_0598-BOH78_0599	n.514243G>A	,T	intergenic_region	MODIFIER	BOH78_0598-BOH78_0599	BOH78_0598-BOH78_0599	intergenic_region	BOH78_0598-BOH78_0599	n.514243G>T
BOH78_Sc002	514255	A	C	downstream_gene_variant	MODIFIER				BOH78_0598	transcript	ONH77229	protein_coding	c.*130A>C	130	,C	intergenic_region	MODIFIER	BOH78_0598-BOH78_0599	BOH78_0598-BOH78_0599	intergenic_region	BOH78_0598-BOH78_0599	n.514255A>C
BOH78_Sc002	514131	A	G	downstream_gene_variant	MODIFIER				BOH78_0598	transcript	ONH77229	protein_coding	c.*6A>G	6	,G	intergenic_region	MODIFIER	BOH78_0598-BOH78_0599	BOH78_0598-BOH78_0599	intergenic_region	BOH78_0598-BOH78_0599	n.514131A>G
BOH78_Sc002	514220	T	C	downstream_gene_variant	MODIFIER				BOH78_0598	transcript	ONH77229	protein_coding	c.*95T>C	95	,C	intergenic_region	MODIFIER	BOH78_0598-BOH78_0599	BOH78_0598-BOH78_0599	intergenic_region	BOH78_0598-BOH78_0599	n.514220T>C
BOH78_Sc002	514264	G	A	downstream_gene_variant	MODIFIER				BOH78_0598	transcript	ONH77229	protein_coding	c.*139G>A	139	,A	intergenic_region	MODIFIER	BOH78_0598-BOH78_0599	BOH78_0598-BOH78_0599	intergenic_region	BOH78_0598-BOH78_0599	n.514264G>A
BOH78_Sc002	514228	G	A	downstream_gene_variant	MODIFIER				BOH78_0598	transcript	ONH77229	protein_coding	c.*103G>A	103	,A	intergenic_region	MODIFIER	BOH78_0598-BOH78_0599	BOH78_0598-BOH78_0599	intergenic_region	BOH78_0598-BOH78_0599	n.514228G>A
BOH78_Sc002	514221	T	A	downstream_gene_variant	MODIFIER				BOH78_0598	transcript	ONH77229	protein_coding	c.*96T>A	96	,A	intergenic_region	MODIFIER	BOH78_0598-BOH78_0599	BOH78_0598-BOH78_0599	intergenic_region	BOH78_0598-BOH78_0599	n.514221T>A
BOH78_Sc002	514212	G	C	downstream_gene_variant	MODIFIER				BOH78_0598	transcript	ONH77229	protein_coding	c.*87G>C	87	,C	intergenic_region	MODIFIER	BOH78_0598-BOH78_0599	BOH78_0598-BOH78_0599	intergenic_region	BOH78_0598-BOH78_0599	n.514212G>C
BOH78_Sc002	515651	T	A	downstream_gene_variant	MODIFIER				BOH78_0599	transcript	ONH77230	protein_coding	c.*61T>A	61	,A	downstream_gene_variant	MODIFIER	BOH78_0600	BOH78_0600	transcript	ONH77237	protein_coding	c.*154A>T	154	,A	intergenic_region	MODIFIER	BOH78_0599-BOH78_0600	BOH78_0599-BOH78_0600	intergenic_region	BOH78_0599-BOH78_0600	n.515651T>A
BOH78_Sc002	515620	T	C	downstream_gene_variant	MODIFIER				BOH78_0599	transcript	ONH77230	protein_coding	c.*30T>C	30	,C	downstream_gene_variant	MODIFIER	BOH78_0600	BOH78_0600	transcript	ONH77237	protein_coding	c.*185A>G	185	,C	intergenic_region	MODIFIER	BOH78_0599-BOH78_0600	BOH78_0599-BOH78_0600	intergenic_region	BOH78_0599-BOH78_0600	n.515620T>C
BOH78_Sc002	520976	C	T	downstream_gene_variant	MODIFIER				BOH78_0602	transcript	ONH77235	protein_coding	c.*130C>T	130	,T	downstream_gene_variant	MODIFIER	BOH78_0603	BOH78_0603	transcript	ONH77236	protein_coding	c.*61G>A	61	,T	intergenic_region	MODIFIER	BOH78_0602-BOH78_0603	BOH78_0602-BOH78_0603	intergenic_region	BOH78_0602-BOH78_0603	n.520976C>T
BOH78_Sc002	523378	G	A	downstream_gene_variant	MODIFIER				BOH78_0605	transcript	ONH77234	protein_coding	c.*469C>T	469	,A	intron_variant	MODIFIER	BOH78_0604	BOH78_0604	transcript	ONH77233	protein_coding	2023-01-01	c.1044+28G>A
BOH78_Sc002	523428	T	C	downstream_gene_variant	MODIFIER				BOH78_0605	transcript	ONH77234	protein_coding	c.*419A>G	419	,C	intron_variant	MODIFIER	BOH78_0604	BOH78_0604	transcript	ONH77233	protein_coding	2023-01-01	c.1044+78T>C
BOH78_Sc002	526346	G	A	downstream_gene_variant	MODIFIER				BOH78_0606	transcript	ONH77231	protein_coding	c.*108C>T	108	,A	intergenic_region	MODIFIER	BOH78_0605-BOH78_0606	BOH78_0605-BOH78_0606	intergenic_region	BOH78_0605-BOH78_0606	n.526346G>A
BOH78_Sc002	526327	G	A	downstream_gene_variant	MODIFIER				BOH78_0606	transcript	ONH77231	protein_coding	c.*127C>T	127	,A	intergenic_region	MODIFIER	BOH78_0605-BOH78_0606	BOH78_0605-BOH78_0606	intergenic_region	BOH78_0605-BOH78_0606	n.526327G>A
BOH78_Sc002	526371	C	T	downstream_gene_variant	MODIFIER				BOH78_0606	transcript	ONH77231	protein_coding	c.*83G>A	83	,T	intergenic_region	MODIFIER	BOH78_0605-BOH78_0606	BOH78_0605-BOH78_0606	intergenic_region	BOH78_0605-BOH78_0606	n.526371C>T
BOH78_Sc002	526351	G	C	downstream_gene_variant	MODIFIER				BOH78_0606	transcript	ONH77231	protein_coding	c.*103C>G	103	,C	intergenic_region	MODIFIER	BOH78_0605-BOH78_0606	BOH78_0605-BOH78_0606	intergenic_region	BOH78_0605-BOH78_0606	n.526351G>C
BOH78_Sc002	526313	C	A	downstream_gene_variant	MODIFIER				BOH78_0606	transcript	ONH77231	protein_coding	c.*141G>T	141	,A	intergenic_region	MODIFIER	BOH78_0605-BOH78_0606	BOH78_0605-BOH78_0606	intergenic_region	BOH78_0605-BOH78_0606	n.526313C>A
BOH78_Sc002	526266	G	A	downstream_gene_variant	MODIFIER				BOH78_0606	transcript	ONH77231	protein_coding	c.*188C>T	188	,A	intergenic_region	MODIFIER	BOH78_0605-BOH78_0606	BOH78_0605-BOH78_0606	intergenic_region	BOH78_0605-BOH78_0606	n.526266G>A
BOH78_Sc002	526314	A	G	downstream_gene_variant	MODIFIER				BOH78_0606	transcript	ONH77231	protein_coding	c.*140T>C	140	,G	intergenic_region	MODIFIER	BOH78_0605-BOH78_0606	BOH78_0605-BOH78_0606	intergenic_region	BOH78_0605-BOH78_0606	n.526314A>G
BOH78_Sc002	531239	A	T	downstream_gene_variant	MODIFIER				BOH78_0610	transcript	ONH77403	protein_coding	c.*29T>A	29	,T	intergenic_region	MODIFIER	BOH78_0609-BOH78_0610	BOH78_0609-BOH78_0610	intergenic_region	BOH78_0609-BOH78_0610	n.531239A>T
BOH78_Sc002	531213	G	A	downstream_gene_variant	MODIFIER				BOH78_0610	transcript	ONH77403	protein_coding	c.*55C>T	55	,A	intergenic_region	MODIFIER	BOH78_0609-BOH78_0610	BOH78_0609-BOH78_0610	intergenic_region	BOH78_0609-BOH78_0610	n.531213G>A
BOH78_Sc002	538450	T	A	downstream_gene_variant	MODIFIER				BOH78_0613	transcript	ONH77404	protein_coding	c.*200T>A	200	,A	intergenic_region	MODIFIER	BOH78_0613-BOH78_0614	BOH78_0613-BOH78_0614	intergenic_region	BOH78_0613-BOH78_0614	n.538450T>A
BOH78_Sc002	538575	A	G	downstream_gene_variant	MODIFIER				BOH78_0613	transcript	ONH77404	protein_coding	c.*325A>G	325	,G	intergenic_region	MODIFIER	BOH78_0613-BOH78_0614	BOH78_0613-BOH78_0614	intergenic_region	BOH78_0613-BOH78_0614	n.538575A>G
BOH78_Sc002	538680	A	G	downstream_gene_variant	MODIFIER				BOH78_0613	transcript	ONH77404	protein_coding	c.*430A>G	430	,G	intergenic_region	MODIFIER	BOH78_0613-BOH78_0614	BOH78_0613-BOH78_0614	intergenic_region	BOH78_0613-BOH78_0614	n.538680A>G
BOH78_Sc002	538604	G	T	downstream_gene_variant	MODIFIER				BOH78_0613	transcript	ONH77404	protein_coding	c.*354G>T	354	,T	intergenic_region	MODIFIER	BOH78_0613-BOH78_0614	BOH78_0613-BOH78_0614	intergenic_region	BOH78_0613-BOH78_0614	n.538604G>T
BOH78_Sc002	538516	T	C	downstream_gene_variant	MODIFIER				BOH78_0613	transcript	ONH77404	protein_coding	c.*266T>C	266	,C	intergenic_region	MODIFIER	BOH78_0613-BOH78_0614	BOH78_0613-BOH78_0614	intergenic_region	BOH78_0613-BOH78_0614	n.538516T>C
BOH78_Sc002	538441	G	A	downstream_gene_variant	MODIFIER				BOH78_0613	transcript	ONH77404	protein_coding	c.*191G>A	191	,A	intergenic_region	MODIFIER	BOH78_0613-BOH78_0614	BOH78_0613-BOH78_0614	intergenic_region	BOH78_0613-BOH78_0614	n.538441G>A
BOH78_Sc002	543602	A	G	downstream_gene_variant	MODIFIER				BOH78_0617	transcript	ONH77400	protein_coding	c.*189A>G	189	,G	intergenic_region	MODIFIER	BOH78_0617-BOH78_0618	BOH78_0617-BOH78_0618	intergenic_region	BOH78_0617-BOH78_0618	n.543602A>G
BOH78_Sc002	543656	T	C	downstream_gene_variant	MODIFIER				BOH78_0617	transcript	ONH77400	protein_coding	c.*243T>C	243	,C	intergenic_region	MODIFIER	BOH78_0617-BOH78_0618	BOH78_0617-BOH78_0618	intergenic_region	BOH78_0617-BOH78_0618	n.543656T>C
BOH78_Sc002	576867	C	T	downstream_gene_variant	MODIFIER				BOH78_0631	transcript	ONH77077	protein_coding	c.*29C>T	29	,T	downstream_gene_variant	MODIFIER	BOH78_0632	BOH78_0632	transcript	ONH77076	protein_coding	c.*42G>A	42	,T	intergenic_region	MODIFIER	BOH78_0631-BOH78_0632	BOH78_0631-BOH78_0632	intergenic_region	BOH78_0631-BOH78_0632	n.576867C>T
BOH78_Sc002	579430	A	T	downstream_gene_variant	MODIFIER				BOH78_0633	transcript	ONH77075	protein_coding	c.*215T>A	215	,T	intergenic_region	MODIFIER	BOH78_0632-BOH78_0633	BOH78_0632-BOH78_0633	intergenic_region	BOH78_0632-BOH78_0633	n.579430A>T
BOH78_Sc002	579462	G	A	downstream_gene_variant	MODIFIER				BOH78_0633	transcript	ONH77075	protein_coding	c.*183C>T	183	,A	intergenic_region	MODIFIER	BOH78_0632-BOH78_0633	BOH78_0632-BOH78_0633	intergenic_region	BOH78_0632-BOH78_0633	n.579462G>A
BOH78_Sc002	579623	T	A	downstream_gene_variant	MODIFIER				BOH78_0633	transcript	ONH77075	protein_coding	c.*22A>T	22	,A	intergenic_region	MODIFIER	BOH78_0632-BOH78_0633	BOH78_0632-BOH78_0633	intergenic_region	BOH78_0632-BOH78_0633	n.579623T>A
BOH78_Sc002	579614	A	G	downstream_gene_variant	MODIFIER				BOH78_0633	transcript	ONH77075	protein_coding	c.*31T>C	31	,G	intergenic_region	MODIFIER	BOH78_0632-BOH78_0633	BOH78_0632-BOH78_0633	intergenic_region	BOH78_0632-BOH78_0633	n.579614A>G
BOH78_Sc002	579432	C	T	downstream_gene_variant	MODIFIER				BOH78_0633	transcript	ONH77075	protein_coding	c.*213G>A	213	,T	intergenic_region	MODIFIER	BOH78_0632-BOH78_0633	BOH78_0632-BOH78_0633	intergenic_region	BOH78_0632-BOH78_0633	n.579432C>T
BOH78_Sc002	585638	T	A	downstream_gene_variant	MODIFIER				BOH78_0634	transcript	ONH77082	protein_coding	c.*23T>A	23	,A	downstream_gene_variant	MODIFIER	BOH78_0635	BOH78_0635	transcript	ONH77081	protein_coding	c.*41A>T	41	,A	intergenic_region	MODIFIER	BOH78_0634-BOH78_0635	BOH78_0634-BOH78_0635	intergenic_region	BOH78_0634-BOH78_0635	n.585638T>A
BOH78_Sc002	588031	T	G	downstream_gene_variant	MODIFIER				BOH78_0636	transcript	ONH77080	protein_coding	c.*283A>C	283	,G	intergenic_region	MODIFIER	BOH78_0635-BOH78_0636	BOH78_0635-BOH78_0636	intergenic_region	BOH78_0635-BOH78_0636	n.588031T>G
BOH78_Sc002	588151	T	C	downstream_gene_variant	MODIFIER				BOH78_0636	transcript	ONH77080	protein_coding	c.*163A>G	163	,C	intergenic_region	MODIFIER	BOH78_0635-BOH78_0636	BOH78_0635-BOH78_0636	intergenic_region	BOH78_0635-BOH78_0636	n.588151T>C
BOH78_Sc002	587927	G	A	downstream_gene_variant	MODIFIER				BOH78_0636	transcript	ONH77080	protein_coding	c.*387C>T	387	,A	intergenic_region	MODIFIER	BOH78_0635-BOH78_0636	BOH78_0635-BOH78_0636	intergenic_region	BOH78_0635-BOH78_0636	n.587927G>A
BOH78_Sc002	588274	T	G	downstream_gene_variant	MODIFIER				BOH78_0636	transcript	ONH77080	protein_coding	c.*40A>C	40	,G	intergenic_region	MODIFIER	BOH78_0635-BOH78_0636	BOH78_0635-BOH78_0636	intergenic_region	BOH78_0635-BOH78_0636	n.588274T>G
BOH78_Sc002	587942	G	A	downstream_gene_variant	MODIFIER				BOH78_0636	transcript	ONH77080	protein_coding	c.*372C>T	372	,A	intergenic_region	MODIFIER	BOH78_0635-BOH78_0636	BOH78_0635-BOH78_0636	intergenic_region	BOH78_0635-BOH78_0636	n.587942G>A
BOH78_Sc002	587983	G	A	downstream_gene_variant	MODIFIER				BOH78_0636	transcript	ONH77080	protein_coding	c.*331C>T	331	,A	intergenic_region	MODIFIER	BOH78_0635-BOH78_0636	BOH78_0635-BOH78_0636	intergenic_region	BOH78_0635-BOH78_0636	n.587983G>A
BOH78_Sc002	588050	A	G	downstream_gene_variant	MODIFIER				BOH78_0636	transcript	ONH77080	protein_coding	c.*264T>C	264	,G	intergenic_region	MODIFIER	BOH78_0635-BOH78_0636	BOH78_0635-BOH78_0636	intergenic_region	BOH78_0635-BOH78_0636	n.588050A>G
BOH78_Sc002	588018	T	A	downstream_gene_variant	MODIFIER				BOH78_0636	transcript	ONH77080	protein_coding	c.*296A>T	296	,A	intergenic_region	MODIFIER	BOH78_0635-BOH78_0636	BOH78_0635-BOH78_0636	intergenic_region	BOH78_0635-BOH78_0636	n.588018T>A
BOH78_Sc002	588019	G	A	downstream_gene_variant	MODIFIER				BOH78_0636	transcript	ONH77080	protein_coding	c.*295C>T	295	,A	intergenic_region	MODIFIER	BOH78_0635-BOH78_0636	BOH78_0635-BOH78_0636	intergenic_region	BOH78_0635-BOH78_0636	n.588019G>A
BOH78_Sc002	590260	T	G	downstream_gene_variant	MODIFIER				BOH78_0637	transcript	ONH77079	protein_coding	c.*102A>C	102	,G	intergenic_region	MODIFIER	BOH78_0636-BOH78_0637	BOH78_0636-BOH78_0637	intergenic_region	BOH78_0636-BOH78_0637	n.590260T>G
BOH78_Sc002	589981	C	T	downstream_gene_variant	MODIFIER				BOH78_0637	transcript	ONH77079	protein_coding	c.*381G>A	381	,T	intergenic_region	MODIFIER	BOH78_0636-BOH78_0637	BOH78_0636-BOH78_0637	intergenic_region	BOH78_0636-BOH78_0637	n.589981C>T
BOH78_Sc002	589885	C	T	downstream_gene_variant	MODIFIER				BOH78_0637	transcript	ONH77079	protein_coding	c.*477G>A	477	,T	intergenic_region	MODIFIER	BOH78_0636-BOH78_0637	BOH78_0636-BOH78_0637	intergenic_region	BOH78_0636-BOH78_0637	n.589885C>T
BOH78_Sc002	590110	A	G	downstream_gene_variant	MODIFIER				BOH78_0637	transcript	ONH77079	protein_coding	c.*252T>C	252	,G	intergenic_region	MODIFIER	BOH78_0636-BOH78_0637	BOH78_0636-BOH78_0637	intergenic_region	BOH78_0636-BOH78_0637	n.590110A>G
BOH78_Sc002	589870	G	T	downstream_gene_variant	MODIFIER				BOH78_0637	transcript	ONH77079	protein_coding	c.*492C>A	492	,T	intergenic_region	MODIFIER	BOH78_0636-BOH78_0637	BOH78_0636-BOH78_0637	intergenic_region	BOH78_0636-BOH78_0637	n.589870G>T
BOH78_Sc002	590317	G	C	downstream_gene_variant	MODIFIER				BOH78_0637	transcript	ONH77079	protein_coding	c.*45C>G	45	,C	intergenic_region	MODIFIER	BOH78_0636-BOH78_0637	BOH78_0636-BOH78_0637	intergenic_region	BOH78_0636-BOH78_0637	n.590317G>C
BOH78_Sc002	604424	T	C	downstream_gene_variant	MODIFIER				BOH78_0640	transcript	ONH77205	protein_coding	c.*279T>C	279	,C	intron_variant	MODIFIER	BOH78_0641	BOH78_0641	transcript	ONH77206	protein_coding	2023-01-01	c.821+54A>G
BOH78_Sc002	604347	T	A	downstream_gene_variant	MODIFIER				BOH78_0640	transcript	ONH77205	protein_coding	c.*202T>A	202	,A	intron_variant	MODIFIER	BOH78_0641	BOH78_0641	transcript	ONH77206	protein_coding	2023-01-01	c.822-110A>T
BOH78_Sc002	604403	A	C	downstream_gene_variant	MODIFIER				BOH78_0640	transcript	ONH77205	protein_coding	c.*258A>C	258	,C	intron_variant	MODIFIER	BOH78_0641	BOH78_0641	transcript	ONH77206	protein_coding	2023-01-01	c.821+75T>G
BOH78_Sc002	604319	G	T	downstream_gene_variant	MODIFIER				BOH78_0640	transcript	ONH77205	protein_coding	c.*174G>T	174	,T	intron_variant	MODIFIER	BOH78_0641	BOH78_0641	transcript	ONH77206	protein_coding	2023-01-01	c.822-82C>A
BOH78_Sc002	605814	G	A	downstream_gene_variant	MODIFIER				BOH78_0642	transcript	ONH77203	protein_coding	c.*229C>T	229	,A	intergenic_region	MODIFIER	BOH78_0641-BOH78_0642	BOH78_0641-BOH78_0642	intergenic_region	BOH78_0641-BOH78_0642	n.605814G>A
BOH78_Sc002	610260	G	A	downstream_gene_variant	MODIFIER				BOH78_0643	transcript	ONH77204	protein_coding	c.*36G>A	36	,A	downstream_gene_variant	MODIFIER	BOH78_0644	BOH78_0644	transcript	ONH77209	protein_coding	c.*75C>T	75	,A	intergenic_region	MODIFIER	BOH78_0643-BOH78_0644	BOH78_0643-BOH78_0644	intergenic_region	BOH78_0643-BOH78_0644	n.610260G>A
BOH78_Sc002	616786	T	A	downstream_gene_variant	MODIFIER				BOH78_0647	transcript	ONH77208	protein_coding	c.*285A>T	285	,A	intergenic_region	MODIFIER	BOH78_0646-BOH78_0647	BOH78_0646-BOH78_0647	intergenic_region	BOH78_0646-BOH78_0647	n.616786T>A
BOH78_Sc002	616571	A	C	downstream_gene_variant	MODIFIER				BOH78_0647	transcript	ONH77208	protein_coding	c.*500T>G	500	,C	intergenic_region	MODIFIER	BOH78_0646-BOH78_0647	BOH78_0646-BOH78_0647	intergenic_region	BOH78_0646-BOH78_0647	n.616571A>C
BOH78_Sc002	616621	G	A	downstream_gene_variant	MODIFIER				BOH78_0647	transcript	ONH77208	protein_coding	c.*450C>T	450	,A	intergenic_region	MODIFIER	BOH78_0646-BOH78_0647	BOH78_0646-BOH78_0647	intergenic_region	BOH78_0646-BOH78_0647	n.616621G>A
BOH78_Sc002	616919	C	T	downstream_gene_variant	MODIFIER				BOH78_0647	transcript	ONH77208	protein_coding	c.*152G>A	152	,T	intergenic_region	MODIFIER	BOH78_0646-BOH78_0647	BOH78_0646-BOH78_0647	intergenic_region	BOH78_0646-BOH78_0647	n.616919C>T
BOH78_Sc002	616923	T	C	downstream_gene_variant	MODIFIER				BOH78_0647	transcript	ONH77208	protein_coding	c.*148A>G	148	,C	intergenic_region	MODIFIER	BOH78_0646-BOH78_0647	BOH78_0646-BOH78_0647	intergenic_region	BOH78_0646-BOH78_0647	n.616923T>C
BOH78_Sc002	623254	T	C	downstream_gene_variant	MODIFIER				BOH78_0649	transcript	ONH77202	protein_coding	c.*418T>C	418	WARNING_TRANSCRIPT_NO_STOP_CODON,C	downstream_gene_variant	MODIFIER	BOH78_0650	BOH78_0650	transcript	ONH77371	protein_coding	c.*432A>G	432	,C	intergenic_region	MODIFIER	BOH78_0649-BOH78_0650	BOH78_0649-BOH78_0650	intergenic_region	BOH78_0649-BOH78_0650	n.623254T>C
BOH78_Sc002	623032	T	A	downstream_gene_variant	MODIFIER				BOH78_0649	transcript	ONH77202	protein_coding	c.*196T>A	196	WARNING_TRANSCRIPT_NO_STOP_CODON,A	intergenic_region	MODIFIER	BOH78_0649-BOH78_0650	BOH78_0649-BOH78_0650	intergenic_region	BOH78_0649-BOH78_0650	n.623032T>A
BOH78_Sc002	623033	G	A	downstream_gene_variant	MODIFIER				BOH78_0649	transcript	ONH77202	protein_coding	c.*197G>A	197	WARNING_TRANSCRIPT_NO_STOP_CODON,A	intergenic_region	MODIFIER	BOH78_0649-BOH78_0650	BOH78_0649-BOH78_0650	intergenic_region	BOH78_0649-BOH78_0650	n.623033G>A
BOH78_Sc002	623519	T	C	downstream_gene_variant	MODIFIER				BOH78_0650	transcript	ONH77371	protein_coding	c.*167A>G	167	,C	intergenic_region	MODIFIER	BOH78_0649-BOH78_0650	BOH78_0649-BOH78_0650	intergenic_region	BOH78_0649-BOH78_0650	n.623519T>C
BOH78_Sc002	638078	C	T	downstream_gene_variant	MODIFIER				BOH78_0656	transcript	ONH77377	protein_coding	c.*491C>T	491	,T	downstream_gene_variant	MODIFIER	BOH78_0657	BOH78_0657	transcript	ONH77376	protein_coding	c.*36C>T	36	,T	downstream_gene_variant	MODIFIER	BOH78_0658	BOH78_0658	transcript	ONH77369	protein_coding	c.*466G>A	466	,T	intergenic_region	MODIFIER	BOH78_0657-BOH78_0658	BOH78_0657-BOH78_0658	intergenic_region	BOH78_0657-BOH78_0658	n.638078C>T
BOH78_Sc002	638514	A	G	downstream_gene_variant	MODIFIER				BOH78_0657	transcript	ONH77376	protein_coding	c.*472A>G	472	,G	downstream_gene_variant	MODIFIER	BOH78_0658	BOH78_0658	transcript	ONH77369	protein_coding	c.*30T>C	30	,G	intergenic_region	MODIFIER	BOH78_0657-BOH78_0658	BOH78_0657-BOH78_0658	intergenic_region	BOH78_0657-BOH78_0658	n.638514A>G
BOH78_Sc002	643479	G	A	downstream_gene_variant	MODIFIER				BOH78_0661	transcript	ONH77212	protein_coding	c.*44C>T	44	,A	intergenic_region	MODIFIER	BOH78_0660-BOH78_0661	BOH78_0660-BOH78_0661	intergenic_region	BOH78_0660-BOH78_0661	n.643479G>A
BOH78_Sc002	648055	T	C	downstream_gene_variant	MODIFIER				BOH78_0664	transcript	ONH77215	protein_coding	c.*256A>G	256	,C	intergenic_region	MODIFIER	BOH78_0663-BOH78_0664	BOH78_0663-BOH78_0664	intergenic_region	BOH78_0663-BOH78_0664	n.648055T>C
BOH78_Sc002	648254	C	T	downstream_gene_variant	MODIFIER				BOH78_0664	transcript	ONH77215	protein_coding	c.*57G>A	57	,T	intergenic_region	MODIFIER	BOH78_0663-BOH78_0664	BOH78_0663-BOH78_0664	intergenic_region	BOH78_0663-BOH78_0664	n.648254C>T
BOH78_Sc002	662545	G	A	downstream_gene_variant	MODIFIER				BOH78_0671	transcript	ONH77386	protein_coding	c.*229G>A	229	,A	intergenic_region	MODIFIER	BOH78_0671-BOH78_0672	BOH78_0671-BOH78_0672	intergenic_region	BOH78_0671-BOH78_0672	n.662545G>A
BOH78_Sc002	662423	A	G	downstream_gene_variant	MODIFIER				BOH78_0671	transcript	ONH77386	protein_coding	c.*107A>G	107	,G	intergenic_region	MODIFIER	BOH78_0671-BOH78_0672	BOH78_0671-BOH78_0672	intergenic_region	BOH78_0671-BOH78_0672	n.662423A>G
BOH78_Sc002	662837	C	A	downstream_gene_variant	MODIFIER				BOH78_0672	transcript	ONH77385	protein_coding	c.*453G>T	453	,A	intergenic_region	MODIFIER	BOH78_0671-BOH78_0672	BOH78_0671-BOH78_0672	intergenic_region	BOH78_0671-BOH78_0672	n.662837C>A
BOH78_Sc002	662939	C	T	downstream_gene_variant	MODIFIER				BOH78_0672	transcript	ONH77385	protein_coding	c.*351G>A	351	,T	intergenic_region	MODIFIER	BOH78_0671-BOH78_0672	BOH78_0671-BOH78_0672	intergenic_region	BOH78_0671-BOH78_0672	n.662939C>T
BOH78_Sc002	663017	G	T	downstream_gene_variant	MODIFIER				BOH78_0672	transcript	ONH77385	protein_coding	c.*273C>A	273	,T	intergenic_region	MODIFIER	BOH78_0671-BOH78_0672	BOH78_0671-BOH78_0672	intergenic_region	BOH78_0671-BOH78_0672	n.663017G>T
BOH78_Sc002	663101	C	T	downstream_gene_variant	MODIFIER				BOH78_0672	transcript	ONH77385	protein_coding	c.*189G>A	189	,T	intergenic_region	MODIFIER	BOH78_0671-BOH78_0672	BOH78_0671-BOH78_0672	intergenic_region	BOH78_0671-BOH78_0672	n.663101C>T
BOH78_Sc002	667507	A	T	downstream_gene_variant	MODIFIER				BOH78_0673	transcript	ONH77384	protein_coding	c.*4A>T	4	,T	downstream_gene_variant	MODIFIER	BOH78_0674	BOH78_0674	transcript	ONH77383	protein_coding	c.*90T>A	90	,T	intergenic_region	MODIFIER	BOH78_0673-BOH78_0674	BOH78_0673-BOH78_0674	intergenic_region	BOH78_0673-BOH78_0674	n.667507A>T
BOH78_Sc002	677497	G	C	downstream_gene_variant	MODIFIER				BOH78_0680	transcript	ONH77296	protein_coding	c.*209G>C	209	,C	downstream_gene_variant	MODIFIER	BOH78_0681	BOH78_0681	transcript	ONH77297	protein_coding	c.*16C>G	16	,C	intergenic_region	MODIFIER	BOH78_0680-BOH78_0681	BOH78_0680-BOH78_0681	intergenic_region	BOH78_0680-BOH78_0681	n.677497G>C
BOH78_Sc002	680543	T	C	downstream_gene_variant	MODIFIER				BOH78_0682	transcript	ONH77294	protein_coding	c.*133T>C	133	,C	downstream_gene_variant	MODIFIER	BOH78_0683	BOH78_0683	transcript	ONH77295	protein_coding	c.*71A>G	71	,C	intergenic_region	MODIFIER	BOH78_0682-BOH78_0683	BOH78_0682-BOH78_0683	intergenic_region	BOH78_0682-BOH78_0683	n.680543T>C
BOH78_Sc002	680573	G	A	downstream_gene_variant	MODIFIER				BOH78_0682	transcript	ONH77294	protein_coding	c.*163G>A	163	,A	downstream_gene_variant	MODIFIER	BOH78_0683	BOH78_0683	transcript	ONH77295	protein_coding	c.*41C>T	41	,A	intergenic_region	MODIFIER	BOH78_0682-BOH78_0683	BOH78_0682-BOH78_0683	intergenic_region	BOH78_0682-BOH78_0683	n.680573G>A
BOH78_Sc002	680611	T	C	downstream_gene_variant	MODIFIER				BOH78_0682	transcript	ONH77294	protein_coding	c.*201T>C	201	,C	downstream_gene_variant	MODIFIER	BOH78_0683	BOH78_0683	transcript	ONH77295	protein_coding	c.*3A>G	3	,C	intergenic_region	MODIFIER	BOH78_0682-BOH78_0683	BOH78_0682-BOH78_0683	intergenic_region	BOH78_0682-BOH78_0683	n.680611T>C
BOH78_Sc002	680522	C	T	downstream_gene_variant	MODIFIER				BOH78_0682	transcript	ONH77294	protein_coding	c.*112C>T	112	,T	downstream_gene_variant	MODIFIER	BOH78_0683	BOH78_0683	transcript	ONH77295	protein_coding	c.*92G>A	92	,T	intergenic_region	MODIFIER	BOH78_0682-BOH78_0683	BOH78_0682-BOH78_0683	intergenic_region	BOH78_0682-BOH78_0683	n.680522C>T
BOH78_Sc002	696085	T	A	downstream_gene_variant	MODIFIER				BOH78_0691	transcript	ONH77129	protein_coding	c.*110T>A	110	,A	intergenic_region	MODIFIER	BOH78_0691-BOH78_0692	BOH78_0691-BOH78_0692	intergenic_region	BOH78_0691-BOH78_0692	n.696085T>A
BOH78_Sc002	696075	G	T	downstream_gene_variant	MODIFIER				BOH78_0691	transcript	ONH77129	protein_coding	c.*100G>T	100	,T	intergenic_region	MODIFIER	BOH78_0691-BOH78_0692	BOH78_0691-BOH78_0692	intergenic_region	BOH78_0691-BOH78_0692	n.696075G>T
BOH78_Sc002	696092	A	T	downstream_gene_variant	MODIFIER				BOH78_0691	transcript	ONH77129	protein_coding	c.*117A>T	117	,T	intergenic_region	MODIFIER	BOH78_0691-BOH78_0692	BOH78_0691-BOH78_0692	intergenic_region	BOH78_0691-BOH78_0692	n.696092A>T
BOH78_Sc002	696114	T	C	downstream_gene_variant	MODIFIER				BOH78_0691	transcript	ONH77129	protein_coding	c.*139T>C	139	,C	intergenic_region	MODIFIER	BOH78_0691-BOH78_0692	BOH78_0691-BOH78_0692	intergenic_region	BOH78_0691-BOH78_0692	n.696114T>C
BOH78_Sc002	699779	G	C	downstream_gene_variant	MODIFIER				BOH78_0692	transcript	ONH77132	protein_coding	c.*118G>C	118	,C	downstream_gene_variant	MODIFIER	BOH78_0693	BOH78_0693	transcript	ONH77131	protein_coding	c.*2C>G	2	,C	intergenic_region	MODIFIER	BOH78_0692-BOH78_0693	BOH78_0692-BOH78_0693	intergenic_region	BOH78_0692-BOH78_0693	n.699779G>C
BOH78_Sc002	704139	A	G	downstream_gene_variant	MODIFIER				BOH78_0695	transcript	ONH77125	protein_coding	c.*101T>C	101	,G	intergenic_region	MODIFIER	BOH78_0694-BOH78_0695	BOH78_0694-BOH78_0695	intergenic_region	BOH78_0694-BOH78_0695	n.704139A>G
BOH78_Sc002	704231	T	C	downstream_gene_variant	MODIFIER				BOH78_0695	transcript	ONH77125	protein_coding	c.*9A>G	9	,C	intergenic_region	MODIFIER	BOH78_0694-BOH78_0695	BOH78_0694-BOH78_0695	intergenic_region	BOH78_0694-BOH78_0695	n.704231T>C
BOH78_Sc002	704049	A	G	downstream_gene_variant	MODIFIER				BOH78_0695	transcript	ONH77125	protein_coding	c.*191T>C	191	,G	intergenic_region	MODIFIER	BOH78_0694-BOH78_0695	BOH78_0694-BOH78_0695	intergenic_region	BOH78_0694-BOH78_0695	n.704049A>G
BOH78_Sc002	705775	G	T	downstream_gene_variant	MODIFIER				BOH78_0696	transcript	ONH77128	protein_coding	c.*46G>T	46	,T	downstream_gene_variant	MODIFIER	BOH78_0697	BOH78_0697	transcript	ONH77127	protein_coding	c.*76C>A	76	,T	intergenic_region	MODIFIER	BOH78_0696-BOH78_0697	BOH78_0696-BOH78_0697	intergenic_region	BOH78_0696-BOH78_0697	n.705775G>T
BOH78_Sc003	2573	G	T	downstream_gene_variant	MODIFIER				BOH78_0701	transcript	ONH76663	protein_coding	c.*470G>T	470	,T	intergenic_region	MODIFIER	BOH78_0701-BOH78_0702	BOH78_0701-BOH78_0702	intergenic_region	BOH78_0701-BOH78_0702	n.2573G>T
BOH78_Sc003	10270	C	A	downstream_gene_variant	MODIFIER				BOH78_0705	transcript	ONH76659	protein_coding	c.*105C>A	105	,A	downstream_gene_variant	MODIFIER	BOH78_0706	BOH78_0706	transcript	ONH76658	protein_coding	c.*45G>T	45	,A	intergenic_region	MODIFIER	BOH78_0705-BOH78_0706	BOH78_0705-BOH78_0706	intergenic_region	BOH78_0705-BOH78_0706	n.10270C>A
BOH78_Sc003	10310	T	C	downstream_gene_variant	MODIFIER				BOH78_0705	transcript	ONH76659	protein_coding	c.*145T>C	145	,C	downstream_gene_variant	MODIFIER	BOH78_0706	BOH78_0706	transcript	ONH76658	protein_coding	c.*5A>G	5	,C	intergenic_region	MODIFIER	BOH78_0705-BOH78_0706	BOH78_0705-BOH78_0706	intergenic_region	BOH78_0705-BOH78_0706	n.10310T>C
BOH78_Sc003	10168	G	A	downstream_gene_variant	MODIFIER				BOH78_0705	transcript	ONH76659	protein_coding	c.*3G>A	3	,A	downstream_gene_variant	MODIFIER	BOH78_0706	BOH78_0706	transcript	ONH76658	protein_coding	c.*147C>T	147	,A	intergenic_region	MODIFIER	BOH78_0705-BOH78_0706	BOH78_0705-BOH78_0706	intergenic_region	BOH78_0705-BOH78_0706	n.10168G>A
BOH78_Sc003	19828	G	A	downstream_gene_variant	MODIFIER				BOH78_0711	transcript	ONH76834	protein_coding	c.*232G>A	232	,A	intergenic_region	MODIFIER	BOH78_0711-BOH78_0712	BOH78_0711-BOH78_0712	intergenic_region	BOH78_0711-BOH78_0712	n.19828G>A
BOH78_Sc003	19927	T	G,A	downstream_gene_variant	MODIFIER				BOH78_0711	transcript	ONH76834	protein_coding	c.*331T>A	331	,G	downstream_gene_variant	MODIFIER	BOH78_0711	BOH78_0711	transcript	ONH76834	protein_coding	c.*331T>G	331	,A	intergenic_region	MODIFIER	BOH78_0711-BOH78_0712	BOH78_0711-BOH78_0712	intergenic_region	BOH78_0711-BOH78_0712	n.19927T>A	,G	intergenic_region	MODIFIER	BOH78_0711-BOH78_0712	BOH78_0711-BOH78_0712	intergenic_region	BOH78_0711-BOH78_0712	n.19927T>G
BOH78_Sc003	19930	G	A	downstream_gene_variant	MODIFIER				BOH78_0711	transcript	ONH76834	protein_coding	c.*334G>A	334	,A	intergenic_region	MODIFIER	BOH78_0711-BOH78_0712	BOH78_0711-BOH78_0712	intergenic_region	BOH78_0711-BOH78_0712	n.19930G>A
BOH78_Sc003	19922	T	*,G	downstream_gene_variant	MODIFIER				BOH78_0711	transcript	ONH76834	protein_coding	c.*326T>G	326	,G	intergenic_region	MODIFIER	BOH78_0711-BOH78_0712	BOH78_0711-BOH78_0712	intergenic_region	BOH78_0711-BOH78_0712	n.19922T>G
BOH78_Sc003	19910	C	T	downstream_gene_variant	MODIFIER				BOH78_0711	transcript	ONH76834	protein_coding	c.*314C>T	314	,T	intergenic_region	MODIFIER	BOH78_0711-BOH78_0712	BOH78_0711-BOH78_0712	intergenic_region	BOH78_0711-BOH78_0712	n.19910C>T
BOH78_Sc003	19679	C	T	downstream_gene_variant	MODIFIER				BOH78_0711	transcript	ONH76834	protein_coding	c.*83C>T	83	,T	intergenic_region	MODIFIER	BOH78_0711-BOH78_0712	BOH78_0711-BOH78_0712	intergenic_region	BOH78_0711-BOH78_0712	n.19679C>T
BOH78_Sc003	19822	G	A	downstream_gene_variant	MODIFIER				BOH78_0711	transcript	ONH76834	protein_coding	c.*226G>A	226	,A	intergenic_region	MODIFIER	BOH78_0711-BOH78_0712	BOH78_0711-BOH78_0712	intergenic_region	BOH78_0711-BOH78_0712	n.19822G>A
BOH78_Sc003	19825	G	A	downstream_gene_variant	MODIFIER				BOH78_0711	transcript	ONH76834	protein_coding	c.*229G>A	229	,A	intergenic_region	MODIFIER	BOH78_0711-BOH78_0712	BOH78_0711-BOH78_0712	intergenic_region	BOH78_0711-BOH78_0712	n.19825G>A
BOH78_Sc003	19868	T	C	downstream_gene_variant	MODIFIER				BOH78_0711	transcript	ONH76834	protein_coding	c.*272T>C	272	,C	intergenic_region	MODIFIER	BOH78_0711-BOH78_0712	BOH78_0711-BOH78_0712	intergenic_region	BOH78_0711-BOH78_0712	n.19868T>C
BOH78_Sc003	19829	G	C	downstream_gene_variant	MODIFIER				BOH78_0711	transcript	ONH76834	protein_coding	c.*233G>C	233	,C	intergenic_region	MODIFIER	BOH78_0711-BOH78_0712	BOH78_0711-BOH78_0712	intergenic_region	BOH78_0711-BOH78_0712	n.19829G>C
BOH78_Sc003	19835	A	G	downstream_gene_variant	MODIFIER				BOH78_0711	transcript	ONH76834	protein_coding	c.*239A>G	239	,G	intergenic_region	MODIFIER	BOH78_0711-BOH78_0712	BOH78_0711-BOH78_0712	intergenic_region	BOH78_0711-BOH78_0712	n.19835A>G
BOH78_Sc003	19840	T	G	downstream_gene_variant	MODIFIER				BOH78_0711	transcript	ONH76834	protein_coding	c.*244T>G	244	,G	intergenic_region	MODIFIER	BOH78_0711-BOH78_0712	BOH78_0711-BOH78_0712	intergenic_region	BOH78_0711-BOH78_0712	n.19840T>G
BOH78_Sc003	19936	A	G	downstream_gene_variant	MODIFIER				BOH78_0711	transcript	ONH76834	protein_coding	c.*340A>G	340	,G	intergenic_region	MODIFIER	BOH78_0711-BOH78_0712	BOH78_0711-BOH78_0712	intergenic_region	BOH78_0711-BOH78_0712	n.19936A>G
BOH78_Sc003	19908	T	C	downstream_gene_variant	MODIFIER				BOH78_0711	transcript	ONH76834	protein_coding	c.*312T>C	312	,C	intergenic_region	MODIFIER	BOH78_0711-BOH78_0712	BOH78_0711-BOH78_0712	intergenic_region	BOH78_0711-BOH78_0712	n.19908T>C
BOH78_Sc003	19703	G	A	downstream_gene_variant	MODIFIER				BOH78_0711	transcript	ONH76834	protein_coding	c.*107G>A	107	,A	intergenic_region	MODIFIER	BOH78_0711-BOH78_0712	BOH78_0711-BOH78_0712	intergenic_region	BOH78_0711-BOH78_0712	n.19703G>A
BOH78_Sc003	19898	T	C	downstream_gene_variant	MODIFIER				BOH78_0711	transcript	ONH76834	protein_coding	c.*302T>C	302	,C	intergenic_region	MODIFIER	BOH78_0711-BOH78_0712	BOH78_0711-BOH78_0712	intergenic_region	BOH78_0711-BOH78_0712	n.19898T>C
BOH78_Sc003	26394	T	A	downstream_gene_variant	MODIFIER				BOH78_0713	transcript	ONH76836	protein_coding	c.*268T>A	268	,A	intergenic_region	MODIFIER	BOH78_0713-BOH78_0714	BOH78_0713-BOH78_0714	intergenic_region	BOH78_0713-BOH78_0714	n.26394T>A
BOH78_Sc003	26440	T	C	downstream_gene_variant	MODIFIER				BOH78_0713	transcript	ONH76836	protein_coding	c.*314T>C	314	,C	intergenic_region	MODIFIER	BOH78_0713-BOH78_0714	BOH78_0713-BOH78_0714	intergenic_region	BOH78_0713-BOH78_0714	n.26440T>C
BOH78_Sc003	26530	G	A	downstream_gene_variant	MODIFIER				BOH78_0713	transcript	ONH76836	protein_coding	c.*404G>A	404	,A	intergenic_region	MODIFIER	BOH78_0713-BOH78_0714	BOH78_0713-BOH78_0714	intergenic_region	BOH78_0713-BOH78_0714	n.26530G>A
BOH78_Sc003	26311	C	G	downstream_gene_variant	MODIFIER				BOH78_0713	transcript	ONH76836	protein_coding	c.*185C>G	185	,G	intergenic_region	MODIFIER	BOH78_0713-BOH78_0714	BOH78_0713-BOH78_0714	intergenic_region	BOH78_0713-BOH78_0714	n.26311C>G
BOH78_Sc003	26198	T	C	downstream_gene_variant	MODIFIER				BOH78_0713	transcript	ONH76836	protein_coding	c.*72T>C	72	,C	intergenic_region	MODIFIER	BOH78_0713-BOH78_0714	BOH78_0713-BOH78_0714	intergenic_region	BOH78_0713-BOH78_0714	n.26198T>C
BOH78_Sc003	26139	C	T	downstream_gene_variant	MODIFIER				BOH78_0713	transcript	ONH76836	protein_coding	c.*13C>T	13	,T	intergenic_region	MODIFIER	BOH78_0713-BOH78_0714	BOH78_0713-BOH78_0714	intergenic_region	BOH78_0713-BOH78_0714	n.26139C>T
BOH78_Sc003	26514	A	G	downstream_gene_variant	MODIFIER				BOH78_0713	transcript	ONH76836	protein_coding	c.*388A>G	388	,G	intergenic_region	MODIFIER	BOH78_0713-BOH78_0714	BOH78_0713-BOH78_0714	intergenic_region	BOH78_0713-BOH78_0714	n.26514A>G
BOH78_Sc003	29934	G	A	downstream_gene_variant	MODIFIER				BOH78_0716	transcript	ONH76839	protein_coding	c.*68C>T	68	,A	intergenic_region	MODIFIER	BOH78_0715-BOH78_0716	BOH78_0715-BOH78_0716	intergenic_region	BOH78_0715-BOH78_0716	n.29934G>A
BOH78_Sc003	29809	T	C	downstream_gene_variant	MODIFIER				BOH78_0716	transcript	ONH76839	protein_coding	c.*193A>G	193	,C	intergenic_region	MODIFIER	BOH78_0715-BOH78_0716	BOH78_0715-BOH78_0716	intergenic_region	BOH78_0715-BOH78_0716	n.29809T>C
BOH78_Sc003	29836	A	G	downstream_gene_variant	MODIFIER				BOH78_0716	transcript	ONH76839	protein_coding	c.*166T>C	166	,G	intergenic_region	MODIFIER	BOH78_0715-BOH78_0716	BOH78_0715-BOH78_0716	intergenic_region	BOH78_0715-BOH78_0716	n.29836A>G
BOH78_Sc003	29835	A	G	downstream_gene_variant	MODIFIER				BOH78_0716	transcript	ONH76839	protein_coding	c.*167T>C	167	,G	intergenic_region	MODIFIER	BOH78_0715-BOH78_0716	BOH78_0715-BOH78_0716	intergenic_region	BOH78_0715-BOH78_0716	n.29835A>G
BOH78_Sc003	29630	A	G	downstream_gene_variant	MODIFIER				BOH78_0716	transcript	ONH76839	protein_coding	c.*372T>C	372	,G	intergenic_region	MODIFIER	BOH78_0715-BOH78_0716	BOH78_0715-BOH78_0716	intergenic_region	BOH78_0715-BOH78_0716	n.29630A>G
BOH78_Sc003	48634	T	C	downstream_gene_variant	MODIFIER				BOH78_0726	transcript	ONH76645	protein_coding	c.*369T>C	369	,C	intergenic_region	MODIFIER	BOH78_0726-BOH78_0727	BOH78_0726-BOH78_0727	intergenic_region	BOH78_0726-BOH78_0727	n.48634T>C
BOH78_Sc003	48701	T	G	downstream_gene_variant	MODIFIER				BOH78_0726	transcript	ONH76645	protein_coding	c.*436T>G	436	,G	intergenic_region	MODIFIER	BOH78_0726-BOH78_0727	BOH78_0726-BOH78_0727	intergenic_region	BOH78_0726-BOH78_0727	n.48701T>G
BOH78_Sc003	48482	C	T	downstream_gene_variant	MODIFIER				BOH78_0726	transcript	ONH76645	protein_coding	c.*217C>T	217	,T	intergenic_region	MODIFIER	BOH78_0726-BOH78_0727	BOH78_0726-BOH78_0727	intergenic_region	BOH78_0726-BOH78_0727	n.48482C>T
BOH78_Sc003	48524	A	T	downstream_gene_variant	MODIFIER				BOH78_0726	transcript	ONH76645	protein_coding	c.*259A>T	259	,T	intergenic_region	MODIFIER	BOH78_0726-BOH78_0727	BOH78_0726-BOH78_0727	intergenic_region	BOH78_0726-BOH78_0727	n.48524A>T
BOH78_Sc003	48303	C	T	downstream_gene_variant	MODIFIER				BOH78_0726	transcript	ONH76645	protein_coding	c.*38C>T	38	,T	intergenic_region	MODIFIER	BOH78_0726-BOH78_0727	BOH78_0726-BOH78_0727	intergenic_region	BOH78_0726-BOH78_0727	n.48303C>T
BOH78_Sc003	48350	C	T	downstream_gene_variant	MODIFIER				BOH78_0726	transcript	ONH76645	protein_coding	c.*85C>T	85	,T	intergenic_region	MODIFIER	BOH78_0726-BOH78_0727	BOH78_0726-BOH78_0727	intergenic_region	BOH78_0726-BOH78_0727	n.48350C>T
BOH78_Sc003	54773	C	A	downstream_gene_variant	MODIFIER				BOH78_0729	transcript	ONH76636	protein_coding	c.*393G>T	393	,A	intergenic_region	MODIFIER	BOH78_0728-BOH78_0729	BOH78_0728-BOH78_0729	intergenic_region	BOH78_0728-BOH78_0729	n.54773C>A
BOH78_Sc003	60588	G	C	downstream_gene_variant	MODIFIER				BOH78_0730	transcript	ONH76817	protein_coding	c.*486G>C	486	,C	intergenic_region	MODIFIER	BOH78_0730-BOH78_0731	BOH78_0730-BOH78_0731	intergenic_region	BOH78_0730-BOH78_0731	n.60588G>C
BOH78_Sc003	68957	C	T	downstream_gene_variant	MODIFIER				BOH78_0734	transcript	ONH76821	protein_coding	c.*120C>T	120	,T	downstream_gene_variant	MODIFIER	BOH78_0735	BOH78_0735	transcript	ONH76822	protein_coding	c.*3G>A	3	,T	intergenic_region	MODIFIER	BOH78_0734-BOH78_0735	BOH78_0734-BOH78_0735	intergenic_region	BOH78_0734-BOH78_0735	n.68957C>T
BOH78_Sc003	71825	C	A	downstream_gene_variant	MODIFIER				BOH78_0736	transcript	ONH76819	protein_coding	c.*219C>A	219	,A	downstream_gene_variant	MODIFIER	BOH78_0737	BOH78_0737	transcript	ONH76820	protein_coding	c.*126G>T	126	,A	intergenic_region	MODIFIER	BOH78_0736-BOH78_0737	BOH78_0736-BOH78_0737	intergenic_region	BOH78_0736-BOH78_0737	n.71825C>A
BOH78_Sc003	71712	A	G	downstream_gene_variant	MODIFIER				BOH78_0736	transcript	ONH76819	protein_coding	c.*106A>G	106	,G	downstream_gene_variant	MODIFIER	BOH78_0737	BOH78_0737	transcript	ONH76820	protein_coding	c.*239T>C	239	,G	intergenic_region	MODIFIER	BOH78_0736-BOH78_0737	BOH78_0736-BOH78_0737	intergenic_region	BOH78_0736-BOH78_0737	n.71712A>G
BOH78_Sc003	71891	G	T	downstream_gene_variant	MODIFIER				BOH78_0736	transcript	ONH76819	protein_coding	c.*285G>T	285	,T	downstream_gene_variant	MODIFIER	BOH78_0737	BOH78_0737	transcript	ONH76820	protein_coding	c.*60C>A	60	,T	intergenic_region	MODIFIER	BOH78_0736-BOH78_0737	BOH78_0736-BOH78_0737	intergenic_region	BOH78_0736-BOH78_0737	n.71891G>T
BOH78_Sc003	81064	A	T	downstream_gene_variant	MODIFIER				BOH78_0743	transcript	ONH76706	protein_coding	c.*123A>T	123	,T	downstream_gene_variant	MODIFIER	BOH78_0744	BOH78_0744	transcript	ONH76713	protein_coding	c.*16T>A	16	,T	intergenic_region	MODIFIER	BOH78_0743-BOH78_0744	BOH78_0743-BOH78_0744	intergenic_region	BOH78_0743-BOH78_0744	n.81064A>T
BOH78_Sc003	86204	A	C	downstream_gene_variant	MODIFIER				BOH78_0745	transcript	ONH76712	protein_coding	c.*55A>C	55	,C	intergenic_region	MODIFIER	BOH78_0745-BOH78_0746	BOH78_0745-BOH78_0746	intergenic_region	BOH78_0745-BOH78_0746	n.86204A>C
BOH78_Sc003	99042	G	A	downstream_gene_variant	MODIFIER				BOH78_0751	transcript	ONH76890	protein_coding	c.*367C>T	367	,A	intergenic_region	MODIFIER	BOH78_0750-BOH78_0751	BOH78_0750-BOH78_0751	intergenic_region	BOH78_0750-BOH78_0751	n.99042G>A
BOH78_Sc003	99002	C	T	downstream_gene_variant	MODIFIER				BOH78_0751	transcript	ONH76890	protein_coding	c.*407G>A	407	,T	intergenic_region	MODIFIER	BOH78_0750-BOH78_0751	BOH78_0750-BOH78_0751	intergenic_region	BOH78_0750-BOH78_0751	n.99002C>T
BOH78_Sc003	99295	C	G	downstream_gene_variant	MODIFIER				BOH78_0751	transcript	ONH76890	protein_coding	c.*114G>C	114	,G	intergenic_region	MODIFIER	BOH78_0750-BOH78_0751	BOH78_0750-BOH78_0751	intergenic_region	BOH78_0750-BOH78_0751	n.99295C>G
BOH78_Sc003	102304	T	G	downstream_gene_variant	MODIFIER				BOH78_0752	transcript	ONH76891	protein_coding	c.*283T>G	283	,G	intergenic_region	MODIFIER	BOH78_0752-BOH78_0753	BOH78_0752-BOH78_0753	intergenic_region	BOH78_0752-BOH78_0753	n.102304T>G
BOH78_Sc003	102242	C	T	downstream_gene_variant	MODIFIER				BOH78_0752	transcript	ONH76891	protein_coding	c.*221C>T	221	,T	intergenic_region	MODIFIER	BOH78_0752-BOH78_0753	BOH78_0752-BOH78_0753	intergenic_region	BOH78_0752-BOH78_0753	n.102242C>T
BOH78_Sc003	102322	C	T	downstream_gene_variant	MODIFIER				BOH78_0752	transcript	ONH76891	protein_coding	c.*301C>T	301	,T	intergenic_region	MODIFIER	BOH78_0752-BOH78_0753	BOH78_0752-BOH78_0753	intergenic_region	BOH78_0752-BOH78_0753	n.102322C>T
BOH78_Sc003	104463	G	A	downstream_gene_variant	MODIFIER				BOH78_0753	transcript	ONH76892	protein_coding	c.*190G>A	190	,A	downstream_gene_variant	MODIFIER	BOH78_0754	BOH78_0754	transcript	ONH76885	protein_coding	c.*45C>T	45	,A	intergenic_region	MODIFIER	BOH78_0753-BOH78_0754	BOH78_0753-BOH78_0754	intergenic_region	BOH78_0753-BOH78_0754	n.104463G>A
BOH78_Sc003	110576	A	G	downstream_gene_variant	MODIFIER				BOH78_0755	transcript	ONH76886	protein_coding	c.*63A>G	63	,G	intergenic_region	MODIFIER	BOH78_0755-BOH78_0756	BOH78_0755-BOH78_0756	intergenic_region	BOH78_0755-BOH78_0756	n.110576A>G
BOH78_Sc003	110572	G	T	downstream_gene_variant	MODIFIER				BOH78_0755	transcript	ONH76886	protein_coding	c.*59G>T	59	,T	intergenic_region	MODIFIER	BOH78_0755-BOH78_0756	BOH78_0755-BOH78_0756	intergenic_region	BOH78_0755-BOH78_0756	n.110572G>T
BOH78_Sc003	110835	A	G	downstream_gene_variant	MODIFIER				BOH78_0755	transcript	ONH76886	protein_coding	c.*322A>G	322	,G	intergenic_region	MODIFIER	BOH78_0755-BOH78_0756	BOH78_0755-BOH78_0756	intergenic_region	BOH78_0755-BOH78_0756	n.110835A>G
BOH78_Sc003	110947	A	C	downstream_gene_variant	MODIFIER				BOH78_0755	transcript	ONH76886	protein_coding	c.*434A>C	434	,C	intergenic_region	MODIFIER	BOH78_0755-BOH78_0756	BOH78_0755-BOH78_0756	intergenic_region	BOH78_0755-BOH78_0756	n.110947A>C
BOH78_Sc003	110974	A	T	downstream_gene_variant	MODIFIER				BOH78_0755	transcript	ONH76886	protein_coding	c.*461A>T	461	,T	intergenic_region	MODIFIER	BOH78_0755-BOH78_0756	BOH78_0755-BOH78_0756	intergenic_region	BOH78_0755-BOH78_0756	n.110974A>T
BOH78_Sc003	110592	A	G	downstream_gene_variant	MODIFIER				BOH78_0755	transcript	ONH76886	protein_coding	c.*79A>G	79	,G	intergenic_region	MODIFIER	BOH78_0755-BOH78_0756	BOH78_0755-BOH78_0756	intergenic_region	BOH78_0755-BOH78_0756	n.110592A>G
BOH78_Sc003	111640	T	C,A	downstream_gene_variant	MODIFIER				BOH78_0756	transcript	ONH76887	protein_coding	c.*320A>T	320	,C	downstream_gene_variant	MODIFIER	BOH78_0756	BOH78_0756	transcript	ONH76887	protein_coding	c.*320A>G	320	,A	intergenic_region	MODIFIER	BOH78_0755-BOH78_0756	BOH78_0755-BOH78_0756	intergenic_region	BOH78_0755-BOH78_0756	n.111640T>A	,C	intergenic_region	MODIFIER	BOH78_0755-BOH78_0756	BOH78_0755-BOH78_0756	intergenic_region	BOH78_0755-BOH78_0756	n.111640T>C
BOH78_Sc003	111822	T	C	downstream_gene_variant	MODIFIER				BOH78_0756	transcript	ONH76887	protein_coding	c.*138A>G	138	,C	intergenic_region	MODIFIER	BOH78_0755-BOH78_0756	BOH78_0755-BOH78_0756	intergenic_region	BOH78_0755-BOH78_0756	n.111822T>C
BOH78_Sc003	111652	T	C	downstream_gene_variant	MODIFIER				BOH78_0756	transcript	ONH76887	protein_coding	c.*308A>G	308	,C	intergenic_region	MODIFIER	BOH78_0755-BOH78_0756	BOH78_0755-BOH78_0756	intergenic_region	BOH78_0755-BOH78_0756	n.111652T>C
BOH78_Sc003	111851	A	G	downstream_gene_variant	MODIFIER				BOH78_0756	transcript	ONH76887	protein_coding	c.*109T>C	109	,G	intergenic_region	MODIFIER	BOH78_0755-BOH78_0756	BOH78_0755-BOH78_0756	intergenic_region	BOH78_0755-BOH78_0756	n.111851A>G
BOH78_Sc003	111836	C	T	downstream_gene_variant	MODIFIER				BOH78_0756	transcript	ONH76887	protein_coding	c.*124G>A	124	,T	intergenic_region	MODIFIER	BOH78_0755-BOH78_0756	BOH78_0755-BOH78_0756	intergenic_region	BOH78_0755-BOH78_0756	n.111836C>T
BOH78_Sc003	111467	A	T	downstream_gene_variant	MODIFIER				BOH78_0756	transcript	ONH76887	protein_coding	c.*493T>A	493	,T	intergenic_region	MODIFIER	BOH78_0755-BOH78_0756	BOH78_0755-BOH78_0756	intergenic_region	BOH78_0755-BOH78_0756	n.111467A>T
BOH78_Sc003	111887	A	T	downstream_gene_variant	MODIFIER				BOH78_0756	transcript	ONH76887	protein_coding	c.*73T>A	73	,T	intergenic_region	MODIFIER	BOH78_0755-BOH78_0756	BOH78_0755-BOH78_0756	intergenic_region	BOH78_0755-BOH78_0756	n.111887A>T
BOH78_Sc003	111556	G	A	downstream_gene_variant	MODIFIER				BOH78_0756	transcript	ONH76887	protein_coding	c.*404C>T	404	,A	intergenic_region	MODIFIER	BOH78_0755-BOH78_0756	BOH78_0755-BOH78_0756	intergenic_region	BOH78_0755-BOH78_0756	n.111556G>A
BOH78_Sc003	111854	G	A	downstream_gene_variant	MODIFIER				BOH78_0756	transcript	ONH76887	protein_coding	c.*106C>T	106	,A	intergenic_region	MODIFIER	BOH78_0755-BOH78_0756	BOH78_0755-BOH78_0756	intergenic_region	BOH78_0755-BOH78_0756	n.111854G>A
BOH78_Sc003	111770	T	A	downstream_gene_variant	MODIFIER				BOH78_0756	transcript	ONH76887	protein_coding	c.*190A>T	190	,A	intergenic_region	MODIFIER	BOH78_0755-BOH78_0756	BOH78_0755-BOH78_0756	intergenic_region	BOH78_0755-BOH78_0756	n.111770T>A
BOH78_Sc003	111596	C	T	downstream_gene_variant	MODIFIER				BOH78_0756	transcript	ONH76887	protein_coding	c.*364G>A	364	,T	intergenic_region	MODIFIER	BOH78_0755-BOH78_0756	BOH78_0755-BOH78_0756	intergenic_region	BOH78_0755-BOH78_0756	n.111596C>T
BOH78_Sc003	111603	G	A	downstream_gene_variant	MODIFIER				BOH78_0756	transcript	ONH76887	protein_coding	c.*357C>T	357	,A	intergenic_region	MODIFIER	BOH78_0755-BOH78_0756	BOH78_0755-BOH78_0756	intergenic_region	BOH78_0755-BOH78_0756	n.111603G>A
BOH78_Sc003	111663	C	A	downstream_gene_variant	MODIFIER				BOH78_0756	transcript	ONH76887	protein_coding	c.*297G>T	297	,A	intergenic_region	MODIFIER	BOH78_0755-BOH78_0756	BOH78_0755-BOH78_0756	intergenic_region	BOH78_0755-BOH78_0756	n.111663C>A
BOH78_Sc003	111616	G	T	downstream_gene_variant	MODIFIER				BOH78_0756	transcript	ONH76887	protein_coding	c.*344C>A	344	,T	intergenic_region	MODIFIER	BOH78_0755-BOH78_0756	BOH78_0755-BOH78_0756	intergenic_region	BOH78_0755-BOH78_0756	n.111616G>T
BOH78_Sc003	111723	T	A	downstream_gene_variant	MODIFIER				BOH78_0756	transcript	ONH76887	protein_coding	c.*237A>T	237	,A	intergenic_region	MODIFIER	BOH78_0755-BOH78_0756	BOH78_0755-BOH78_0756	intergenic_region	BOH78_0755-BOH78_0756	n.111723T>A
BOH78_Sc003	111655	T	C	downstream_gene_variant	MODIFIER				BOH78_0756	transcript	ONH76887	protein_coding	c.*305A>G	305	,C	intergenic_region	MODIFIER	BOH78_0755-BOH78_0756	BOH78_0755-BOH78_0756	intergenic_region	BOH78_0755-BOH78_0756	n.111655T>C
BOH78_Sc003	111649	A	G	downstream_gene_variant	MODIFIER				BOH78_0756	transcript	ONH76887	protein_coding	c.*311T>C	311	,G	intergenic_region	MODIFIER	BOH78_0755-BOH78_0756	BOH78_0755-BOH78_0756	intergenic_region	BOH78_0755-BOH78_0756	n.111649A>G
BOH78_Sc003	118038	C	T	downstream_gene_variant	MODIFIER				BOH78_0759	transcript	ONH76884	protein_coding	c.*132C>T	132	,T	downstream_gene_variant	MODIFIER	BOH78_0760	BOH78_0760	transcript	ONH76689	protein_coding	c.*49G>A	49	,T	intergenic_region	MODIFIER	BOH78_0759-BOH78_0760	BOH78_0759-BOH78_0760	intergenic_region	BOH78_0759-BOH78_0760	n.118038C>T
BOH78_Sc003	121105	T	C	downstream_gene_variant	MODIFIER				BOH78_0761	transcript	ONH76688	protein_coding	c.*226T>C	226	,C	downstream_gene_variant	MODIFIER	BOH78_0762	BOH78_0762	transcript	ONH76691	protein_coding	c.*52A>G	52	,C	intergenic_region	MODIFIER	BOH78_0761-BOH78_0762	BOH78_0761-BOH78_0762	intergenic_region	BOH78_0761-BOH78_0762	n.121105T>C
BOH78_Sc003	125391	T	C	downstream_gene_variant	MODIFIER				BOH78_0763	transcript	ONH76690	protein_coding	c.*29T>C	29	,C	downstream_gene_variant	MODIFIER	BOH78_0764	BOH78_0764	transcript	ONH76685	protein_coding	c.*105A>G	105	,C	intergenic_region	MODIFIER	BOH78_0763-BOH78_0764	BOH78_0763-BOH78_0764	intergenic_region	BOH78_0763-BOH78_0764	n.125391T>C
BOH78_Sc003	136329	T	C	downstream_gene_variant	MODIFIER				BOH78_0766	transcript	ONH76687	protein_coding	c.*40T>C	40	,C	downstream_gene_variant	MODIFIER	BOH78_0767	BOH78_0767	transcript	ONH76686	protein_coding	c.*6A>G	6	,C	intergenic_region	MODIFIER	BOH78_0766-BOH78_0767	BOH78_0766-BOH78_0767	intergenic_region	BOH78_0766-BOH78_0767	n.136329T>C
BOH78_Sc003	144813	G	A	downstream_gene_variant	MODIFIER				BOH78_0770	transcript	ONH76869	protein_coding	c.*4G>A	4	,A	downstream_gene_variant	MODIFIER	BOH78_0771	BOH78_0771	transcript	ONH76870	protein_coding	c.*58C>T	58	,A	intergenic_region	MODIFIER	BOH78_0770-BOH78_0771	BOH78_0770-BOH78_0771	intergenic_region	BOH78_0770-BOH78_0771	n.144813G>A
BOH78_Sc003	148283	A	G	downstream_gene_variant	MODIFIER				BOH78_0772	transcript	ONH76867	protein_coding	c.*120A>G	120	,G	downstream_gene_variant	MODIFIER	BOH78_0773	BOH78_0773	transcript	ONH76868	protein_coding	c.*3T>C	3	,G	intergenic_region	MODIFIER	BOH78_0772-BOH78_0773	BOH78_0772-BOH78_0773	intergenic_region	BOH78_0772-BOH78_0773	n.148283A>G
BOH78_Sc003	148284	G	A	downstream_gene_variant	MODIFIER				BOH78_0772	transcript	ONH76867	protein_coding	c.*121G>A	121	,A	downstream_gene_variant	MODIFIER	BOH78_0773	BOH78_0773	transcript	ONH76868	protein_coding	c.*2C>T	2	,A	intergenic_region	MODIFIER	BOH78_0772-BOH78_0773	BOH78_0772-BOH78_0773	intergenic_region	BOH78_0772-BOH78_0773	n.148284G>A
BOH78_Sc003	148223	C	T	downstream_gene_variant	MODIFIER				BOH78_0772	transcript	ONH76867	protein_coding	c.*60C>T	60	,T	downstream_gene_variant	MODIFIER	BOH78_0773	BOH78_0773	transcript	ONH76868	protein_coding	c.*63G>A	63	,T	intergenic_region	MODIFIER	BOH78_0772-BOH78_0773	BOH78_0772-BOH78_0773	intergenic_region	BOH78_0772-BOH78_0773	n.148223C>T
BOH78_Sc003	148217	C	T	downstream_gene_variant	MODIFIER				BOH78_0772	transcript	ONH76867	protein_coding	c.*54C>T	54	,T	downstream_gene_variant	MODIFIER	BOH78_0773	BOH78_0773	transcript	ONH76868	protein_coding	c.*69G>A	69	,T	intergenic_region	MODIFIER	BOH78_0772-BOH78_0773	BOH78_0772-BOH78_0773	intergenic_region	BOH78_0772-BOH78_0773	n.148217C>T
BOH78_Sc003	152018	T	G	downstream_gene_variant	MODIFIER				BOH78_0774	transcript	ONH76865	protein_coding	c.*3T>G	3	,G	intergenic_region	MODIFIER	BOH78_0774-BOH78_0775	BOH78_0774-BOH78_0775	intergenic_region	BOH78_0774-BOH78_0775	n.152018T>G
BOH78_Sc003	156363	C	T	downstream_gene_variant	MODIFIER				BOH78_0777	transcript	ONH76864	protein_coding	c.*84G>A	84	,T	intergenic_region	MODIFIER	BOH78_0776-BOH78_0777	BOH78_0776-BOH78_0777	intergenic_region	BOH78_0776-BOH78_0777	n.156363C>T
BOH78_Sc003	156352	C	T	downstream_gene_variant	MODIFIER				BOH78_0777	transcript	ONH76864	protein_coding	c.*95G>A	95	,T	intergenic_region	MODIFIER	BOH78_0776-BOH78_0777	BOH78_0776-BOH78_0777	intergenic_region	BOH78_0776-BOH78_0777	n.156352C>T
BOH78_Sc003	179179	G	A	downstream_gene_variant	MODIFIER				BOH78_0784	transcript	ONH76742	protein_coding	c.*194G>A	194	,A	intergenic_region	MODIFIER	BOH78_0784-BOH78_0785	BOH78_0784-BOH78_0785	intergenic_region	BOH78_0784-BOH78_0785	n.179179G>A
BOH78_Sc003	179355	C	G	downstream_gene_variant	MODIFIER				BOH78_0784	transcript	ONH76742	protein_coding	c.*370C>G	370	,G	intergenic_region	MODIFIER	BOH78_0784-BOH78_0785	BOH78_0784-BOH78_0785	intergenic_region	BOH78_0784-BOH78_0785	n.179355C>G
BOH78_Sc003	179433	A	G	downstream_gene_variant	MODIFIER				BOH78_0784	transcript	ONH76742	protein_coding	c.*448A>G	448	,G	intergenic_region	MODIFIER	BOH78_0784-BOH78_0785	BOH78_0784-BOH78_0785	intergenic_region	BOH78_0784-BOH78_0785	n.179433A>G
BOH78_Sc003	198291	A	G	downstream_gene_variant	MODIFIER				BOH78_0791	transcript	ONH76912	protein_coding	c.*268A>G	268	,G	intergenic_region	MODIFIER	BOH78_0791-BOH78_0792	BOH78_0791-BOH78_0792	intergenic_region	BOH78_0791-BOH78_0792	n.198291A>G
BOH78_Sc003	198450	C	T	downstream_gene_variant	MODIFIER				BOH78_0791	transcript	ONH76912	protein_coding	c.*427C>T	427	,T	intergenic_region	MODIFIER	BOH78_0791-BOH78_0792	BOH78_0791-BOH78_0792	intergenic_region	BOH78_0791-BOH78_0792	n.198450C>T
BOH78_Sc003	198430	T	C	downstream_gene_variant	MODIFIER				BOH78_0791	transcript	ONH76912	protein_coding	c.*407T>C	407	,C	intergenic_region	MODIFIER	BOH78_0791-BOH78_0792	BOH78_0791-BOH78_0792	intergenic_region	BOH78_0791-BOH78_0792	n.198430T>C
BOH78_Sc003	198493	A	G	downstream_gene_variant	MODIFIER				BOH78_0791	transcript	ONH76912	protein_coding	c.*470A>G	470	,G	intergenic_region	MODIFIER	BOH78_0791-BOH78_0792	BOH78_0791-BOH78_0792	intergenic_region	BOH78_0791-BOH78_0792	n.198493A>G
BOH78_Sc003	198462	A	G	downstream_gene_variant	MODIFIER				BOH78_0791	transcript	ONH76912	protein_coding	c.*439A>G	439	,G	intergenic_region	MODIFIER	BOH78_0791-BOH78_0792	BOH78_0791-BOH78_0792	intergenic_region	BOH78_0791-BOH78_0792	n.198462A>G
BOH78_Sc003	198235	T	A	downstream_gene_variant	MODIFIER				BOH78_0791	transcript	ONH76912	protein_coding	c.*212T>A	212	,A	intergenic_region	MODIFIER	BOH78_0791-BOH78_0792	BOH78_0791-BOH78_0792	intergenic_region	BOH78_0791-BOH78_0792	n.198235T>A
BOH78_Sc003	199773	G	A	downstream_gene_variant	MODIFIER				BOH78_0792	transcript	ONH76913	protein_coding	c.*254C>T	254	,A	intergenic_region	MODIFIER	BOH78_0791-BOH78_0792	BOH78_0791-BOH78_0792	intergenic_region	BOH78_0791-BOH78_0792	n.199773G>A
BOH78_Sc003	199827	T	C	downstream_gene_variant	MODIFIER				BOH78_0792	transcript	ONH76913	protein_coding	c.*200A>G	200	,C	intergenic_region	MODIFIER	BOH78_0791-BOH78_0792	BOH78_0791-BOH78_0792	intergenic_region	BOH78_0791-BOH78_0792	n.199827T>C
BOH78_Sc003	199818	T	C	downstream_gene_variant	MODIFIER				BOH78_0792	transcript	ONH76913	protein_coding	c.*209A>G	209	,C	intergenic_region	MODIFIER	BOH78_0791-BOH78_0792	BOH78_0791-BOH78_0792	intergenic_region	BOH78_0791-BOH78_0792	n.199818T>C
BOH78_Sc003	199879	A	G	downstream_gene_variant	MODIFIER				BOH78_0792	transcript	ONH76913	protein_coding	c.*148T>C	148	,G	intergenic_region	MODIFIER	BOH78_0791-BOH78_0792	BOH78_0791-BOH78_0792	intergenic_region	BOH78_0791-BOH78_0792	n.199879A>G
BOH78_Sc003	199747	A	G	downstream_gene_variant	MODIFIER				BOH78_0792	transcript	ONH76913	protein_coding	c.*280T>C	280	,G	intergenic_region	MODIFIER	BOH78_0791-BOH78_0792	BOH78_0791-BOH78_0792	intergenic_region	BOH78_0791-BOH78_0792	n.199747A>G
BOH78_Sc003	202710	C	A	downstream_gene_variant	MODIFIER				BOH78_0794	transcript	ONH76915	protein_coding	c.*179G>T	179	,A	intergenic_region	MODIFIER	BOH78_0793-BOH78_0794	BOH78_0793-BOH78_0794	intergenic_region	BOH78_0793-BOH78_0794	n.202710C>A
BOH78_Sc003	202665	G	T	downstream_gene_variant	MODIFIER				BOH78_0794	transcript	ONH76915	protein_coding	c.*224C>A	224	,T	intergenic_region	MODIFIER	BOH78_0793-BOH78_0794	BOH78_0793-BOH78_0794	intergenic_region	BOH78_0793-BOH78_0794	n.202665G>T
BOH78_Sc003	202670	T	C	downstream_gene_variant	MODIFIER				BOH78_0794	transcript	ONH76915	protein_coding	c.*219A>G	219	,C	intergenic_region	MODIFIER	BOH78_0793-BOH78_0794	BOH78_0793-BOH78_0794	intergenic_region	BOH78_0793-BOH78_0794	n.202670T>C
BOH78_Sc003	218681	G	A	downstream_gene_variant	MODIFIER				BOH78_0803	transcript	ONH76923	protein_coding	c.*173G>A	173	,A	intergenic_region	MODIFIER	BOH78_0803-BOH78_0804	BOH78_0803-BOH78_0804	intergenic_region	BOH78_0803-BOH78_0804	n.218681G>A
BOH78_Sc003	218625	A	G	downstream_gene_variant	MODIFIER				BOH78_0803	transcript	ONH76923	protein_coding	c.*117A>G	117	,G	intergenic_region	MODIFIER	BOH78_0803-BOH78_0804	BOH78_0803-BOH78_0804	intergenic_region	BOH78_0803-BOH78_0804	n.218625A>G
BOH78_Sc003	218894	G	A	downstream_gene_variant	MODIFIER				BOH78_0803	transcript	ONH76923	protein_coding	c.*386G>A	386	,A	intergenic_region	MODIFIER	BOH78_0803-BOH78_0804	BOH78_0803-BOH78_0804	intergenic_region	BOH78_0803-BOH78_0804	n.218894G>A
BOH78_Sc003	218926	C	T	downstream_gene_variant	MODIFIER				BOH78_0803	transcript	ONH76923	protein_coding	c.*418C>T	418	,T	intergenic_region	MODIFIER	BOH78_0803-BOH78_0804	BOH78_0803-BOH78_0804	intergenic_region	BOH78_0803-BOH78_0804	n.218926C>T
BOH78_Sc003	218984	C	T	downstream_gene_variant	MODIFIER				BOH78_0803	transcript	ONH76923	protein_coding	c.*476C>T	476	,T	intergenic_region	MODIFIER	BOH78_0803-BOH78_0804	BOH78_0803-BOH78_0804	intergenic_region	BOH78_0803-BOH78_0804	n.218984C>T
BOH78_Sc003	221986	G	T	downstream_gene_variant	MODIFIER				BOH78_0804	transcript	ONH76924	protein_coding	c.*30G>T	30	,T	intergenic_region	MODIFIER	BOH78_0804-BOH78_0805	BOH78_0804-BOH78_0805	intergenic_region	BOH78_0804-BOH78_0805	n.221986G>T
BOH78_Sc003	222121	A	T	downstream_gene_variant	MODIFIER				BOH78_0804	transcript	ONH76924	protein_coding	c.*165A>T	165	,T	intergenic_region	MODIFIER	BOH78_0804-BOH78_0805	BOH78_0804-BOH78_0805	intergenic_region	BOH78_0804-BOH78_0805	n.222121A>T
BOH78_Sc003	227244	G	T	downstream_gene_variant	MODIFIER				BOH78_0806	transcript	ONH76926	protein_coding	c.*63G>T	63	,T	intergenic_region	MODIFIER	BOH78_0806-BOH78_0807	BOH78_0806-BOH78_0807	intergenic_region	BOH78_0806-BOH78_0807	n.227244G>T
BOH78_Sc003	227273	A	G	downstream_gene_variant	MODIFIER				BOH78_0806	transcript	ONH76926	protein_coding	c.*92A>G	92	,G	intergenic_region	MODIFIER	BOH78_0806-BOH78_0807	BOH78_0806-BOH78_0807	intergenic_region	BOH78_0806-BOH78_0807	n.227273A>G
BOH78_Sc003	233640	T	A	downstream_gene_variant	MODIFIER				BOH78_0809	transcript	ONH76919	protein_coding	c.*172T>A	172	,A	downstream_gene_variant	MODIFIER	BOH78_0810	BOH78_0810	transcript	ONH76758	protein_coding	c.*108A>T	108	,A	intergenic_region	MODIFIER	BOH78_0809-BOH78_0810	BOH78_0809-BOH78_0810	intergenic_region	BOH78_0809-BOH78_0810	n.233640T>A
BOH78_Sc003	233673	T	C	downstream_gene_variant	MODIFIER				BOH78_0809	transcript	ONH76919	protein_coding	c.*205T>C	205	,C	downstream_gene_variant	MODIFIER	BOH78_0810	BOH78_0810	transcript	ONH76758	protein_coding	c.*75A>G	75	,C	intergenic_region	MODIFIER	BOH78_0809-BOH78_0810	BOH78_0809-BOH78_0810	intergenic_region	BOH78_0809-BOH78_0810	n.233673T>C
BOH78_Sc003	233693	A	G	downstream_gene_variant	MODIFIER				BOH78_0809	transcript	ONH76919	protein_coding	c.*225A>G	225	,G	downstream_gene_variant	MODIFIER	BOH78_0810	BOH78_0810	transcript	ONH76758	protein_coding	c.*55T>C	55	,G	intergenic_region	MODIFIER	BOH78_0809-BOH78_0810	BOH78_0809-BOH78_0810	intergenic_region	BOH78_0809-BOH78_0810	n.233693A>G
BOH78_Sc003	241005	T	A	downstream_gene_variant	MODIFIER				BOH78_0812	transcript	ONH76756	protein_coding	c.*398T>A	398	,A	intergenic_region	MODIFIER	BOH78_0812-BOH78_0813	BOH78_0812-BOH78_0813	intergenic_region	BOH78_0812-BOH78_0813	n.241005T>A
BOH78_Sc003	240926	T	C	downstream_gene_variant	MODIFIER				BOH78_0812	transcript	ONH76756	protein_coding	c.*319T>C	319	,C	intergenic_region	MODIFIER	BOH78_0812-BOH78_0813	BOH78_0812-BOH78_0813	intergenic_region	BOH78_0812-BOH78_0813	n.240926T>C
BOH78_Sc003	240935	A	G	downstream_gene_variant	MODIFIER				BOH78_0812	transcript	ONH76756	protein_coding	c.*328A>G	328	,G	intergenic_region	MODIFIER	BOH78_0812-BOH78_0813	BOH78_0812-BOH78_0813	intergenic_region	BOH78_0812-BOH78_0813	n.240935A>G
BOH78_Sc003	240718	T	A	downstream_gene_variant	MODIFIER				BOH78_0812	transcript	ONH76756	protein_coding	c.*111T>A	111	,A	intergenic_region	MODIFIER	BOH78_0812-BOH78_0813	BOH78_0812-BOH78_0813	intergenic_region	BOH78_0812-BOH78_0813	n.240718T>A
BOH78_Sc003	241020	C	T	downstream_gene_variant	MODIFIER				BOH78_0812	transcript	ONH76756	protein_coding	c.*413C>T	413	,T	intergenic_region	MODIFIER	BOH78_0812-BOH78_0813	BOH78_0812-BOH78_0813	intergenic_region	BOH78_0812-BOH78_0813	n.241020C>T
BOH78_Sc003	240815	G	A	downstream_gene_variant	MODIFIER				BOH78_0812	transcript	ONH76756	protein_coding	c.*208G>A	208	,A	intergenic_region	MODIFIER	BOH78_0812-BOH78_0813	BOH78_0812-BOH78_0813	intergenic_region	BOH78_0812-BOH78_0813	n.240815G>A
BOH78_Sc003	240686	C	T	downstream_gene_variant	MODIFIER				BOH78_0812	transcript	ONH76756	protein_coding	c.*79C>T	79	,T	intergenic_region	MODIFIER	BOH78_0812-BOH78_0813	BOH78_0812-BOH78_0813	intergenic_region	BOH78_0812-BOH78_0813	n.240686C>T
BOH78_Sc003	240999	A	G	downstream_gene_variant	MODIFIER				BOH78_0812	transcript	ONH76756	protein_coding	c.*392A>G	392	,G	intergenic_region	MODIFIER	BOH78_0812-BOH78_0813	BOH78_0812-BOH78_0813	intergenic_region	BOH78_0812-BOH78_0813	n.240999A>G
BOH78_Sc003	241006	T	A	downstream_gene_variant	MODIFIER				BOH78_0812	transcript	ONH76756	protein_coding	c.*399T>A	399	,A	intergenic_region	MODIFIER	BOH78_0812-BOH78_0813	BOH78_0812-BOH78_0813	intergenic_region	BOH78_0812-BOH78_0813	n.241006T>A
BOH78_Sc003	242621	T	A	downstream_gene_variant	MODIFIER				BOH78_0813	transcript	ONH76755	protein_coding	c.*411A>T	411	,A	intergenic_region	MODIFIER	BOH78_0812-BOH78_0813	BOH78_0812-BOH78_0813	intergenic_region	BOH78_0812-BOH78_0813	n.242621T>A
BOH78_Sc003	242710	T	C	downstream_gene_variant	MODIFIER				BOH78_0813	transcript	ONH76755	protein_coding	c.*322A>G	322	,C	intergenic_region	MODIFIER	BOH78_0812-BOH78_0813	BOH78_0812-BOH78_0813	intergenic_region	BOH78_0812-BOH78_0813	n.242710T>C
BOH78_Sc003	245547	G	C	downstream_gene_variant	MODIFIER				BOH78_0814	transcript	ONH76754	protein_coding	c.*56G>C	56	,C	intergenic_region	MODIFIER	BOH78_0814-BOH78_0815	BOH78_0814-BOH78_0815	intergenic_region	BOH78_0814-BOH78_0815	n.245547G>C
BOH78_Sc003	245908	C	T	downstream_gene_variant	MODIFIER				BOH78_0814	transcript	ONH76754	protein_coding	c.*417C>T	417	,T	intergenic_region	MODIFIER	BOH78_0814-BOH78_0815	BOH78_0814-BOH78_0815	intergenic_region	BOH78_0814-BOH78_0815	n.245908C>T
BOH78_Sc003	245955	C	T	downstream_gene_variant	MODIFIER				BOH78_0814	transcript	ONH76754	protein_coding	c.*464C>T	464	,T	intergenic_region	MODIFIER	BOH78_0814-BOH78_0815	BOH78_0814-BOH78_0815	intergenic_region	BOH78_0814-BOH78_0815	n.245955C>T
BOH78_Sc003	245958	C	T	downstream_gene_variant	MODIFIER				BOH78_0814	transcript	ONH76754	protein_coding	c.*467C>T	467	,T	intergenic_region	MODIFIER	BOH78_0814-BOH78_0815	BOH78_0814-BOH78_0815	intergenic_region	BOH78_0814-BOH78_0815	n.245958C>T
BOH78_Sc003	245584	A	G	downstream_gene_variant	MODIFIER				BOH78_0814	transcript	ONH76754	protein_coding	c.*93A>G	93	,G	intergenic_region	MODIFIER	BOH78_0814-BOH78_0815	BOH78_0814-BOH78_0815	intergenic_region	BOH78_0814-BOH78_0815	n.245584A>G
BOH78_Sc003	245598	C	A	downstream_gene_variant	MODIFIER				BOH78_0814	transcript	ONH76754	protein_coding	c.*107C>A	107	,A	intergenic_region	MODIFIER	BOH78_0814-BOH78_0815	BOH78_0814-BOH78_0815	intergenic_region	BOH78_0814-BOH78_0815	n.245598C>A
BOH78_Sc003	266184	G	A	downstream_gene_variant	MODIFIER				BOH78_0820	transcript	ONH76901	protein_coding	c.*13G>A	13	,A	downstream_gene_variant	MODIFIER	BOH78_0821	BOH78_0821	transcript	ONH76902	protein_coding	c.*253C>T	253	,A	intergenic_region	MODIFIER	BOH78_0820-BOH78_0821	BOH78_0820-BOH78_0821	intergenic_region	BOH78_0820-BOH78_0821	n.266184G>A
BOH78_Sc003	266431	G	A	downstream_gene_variant	MODIFIER				BOH78_0820	transcript	ONH76901	protein_coding	c.*260G>A	260	,A	downstream_gene_variant	MODIFIER	BOH78_0821	BOH78_0821	transcript	ONH76902	protein_coding	c.*6C>T	6	,A	intergenic_region	MODIFIER	BOH78_0820-BOH78_0821	BOH78_0820-BOH78_0821	intergenic_region	BOH78_0820-BOH78_0821	n.266431G>A
BOH78_Sc003	270997	T	C	downstream_gene_variant	MODIFIER				BOH78_0823	transcript	ONH76900	protein_coding	c.*228T>C	228	,C	intergenic_region	MODIFIER	BOH78_0823-BOH78_0824	BOH78_0823-BOH78_0824	intergenic_region	BOH78_0823-BOH78_0824	n.270997T>C
BOH78_Sc003	270998	C	T	downstream_gene_variant	MODIFIER				BOH78_0823	transcript	ONH76900	protein_coding	c.*229C>T	229	,T	intergenic_region	MODIFIER	BOH78_0823-BOH78_0824	BOH78_0823-BOH78_0824	intergenic_region	BOH78_0823-BOH78_0824	n.270998C>T
BOH78_Sc003	285098	G	A	downstream_gene_variant	MODIFIER				BOH78_0829	transcript	ONH76908	protein_coding	c.*102G>A	102	,A	intergenic_region	MODIFIER	BOH78_0829-BOH78_0830	BOH78_0829-BOH78_0830	intergenic_region	BOH78_0829-BOH78_0830	n.285098G>A
BOH78_Sc003	285295	A	G	downstream_gene_variant	MODIFIER				BOH78_0829	transcript	ONH76908	protein_coding	c.*299A>G	299	,G	intergenic_region	MODIFIER	BOH78_0829-BOH78_0830	BOH78_0829-BOH78_0830	intergenic_region	BOH78_0829-BOH78_0830	n.285295A>G
BOH78_Sc003	285299	T	A	downstream_gene_variant	MODIFIER				BOH78_0829	transcript	ONH76908	protein_coding	c.*303T>A	303	,A	intergenic_region	MODIFIER	BOH78_0829-BOH78_0830	BOH78_0829-BOH78_0830	intergenic_region	BOH78_0829-BOH78_0830	n.285299T>A
BOH78_Sc003	285297	A	G	downstream_gene_variant	MODIFIER				BOH78_0829	transcript	ONH76908	protein_coding	c.*301A>G	301	,G	intergenic_region	MODIFIER	BOH78_0829-BOH78_0830	BOH78_0829-BOH78_0830	intergenic_region	BOH78_0829-BOH78_0830	n.285297A>G
BOH78_Sc003	285289	A	C	downstream_gene_variant	MODIFIER				BOH78_0829	transcript	ONH76908	protein_coding	c.*293A>C	293	,C	intergenic_region	MODIFIER	BOH78_0829-BOH78_0830	BOH78_0829-BOH78_0830	intergenic_region	BOH78_0829-BOH78_0830	n.285289A>C
BOH78_Sc003	287528	A	G	downstream_gene_variant	MODIFIER				BOH78_0830	transcript	ONH76731	protein_coding	c.*262A>G	262	,G	downstream_gene_variant	MODIFIER	BOH78_0831	BOH78_0831	transcript	ONH76730	protein_coding	c.*24T>C	24	,G	intergenic_region	MODIFIER	BOH78_0830-BOH78_0831	BOH78_0830-BOH78_0831	intergenic_region	BOH78_0830-BOH78_0831	n.287528A>G
BOH78_Sc003	289811	G	A	downstream_gene_variant	MODIFIER				BOH78_0832	transcript	ONH76733	protein_coding	c.*449C>T	449	,A	intergenic_region	MODIFIER	BOH78_0831-BOH78_0832	BOH78_0831-BOH78_0832	intergenic_region	BOH78_0831-BOH78_0832	n.289811G>A
BOH78_Sc003	290173	G	T	downstream_gene_variant	MODIFIER				BOH78_0832	transcript	ONH76733	protein_coding	c.*87C>A	87	,T	intergenic_region	MODIFIER	BOH78_0831-BOH78_0832	BOH78_0831-BOH78_0832	intergenic_region	BOH78_0831-BOH78_0832	n.290173G>T
BOH78_Sc003	290148	C	T	downstream_gene_variant	MODIFIER				BOH78_0832	transcript	ONH76733	protein_coding	c.*112G>A	112	,T	intergenic_region	MODIFIER	BOH78_0831-BOH78_0832	BOH78_0831-BOH78_0832	intergenic_region	BOH78_0831-BOH78_0832	n.290148C>T
BOH78_Sc003	290218	A	G	downstream_gene_variant	MODIFIER				BOH78_0832	transcript	ONH76733	protein_coding	c.*42T>C	42	,G	intergenic_region	MODIFIER	BOH78_0831-BOH78_0832	BOH78_0831-BOH78_0832	intergenic_region	BOH78_0831-BOH78_0832	n.290218A>G
BOH78_Sc003	290233	C	T	downstream_gene_variant	MODIFIER				BOH78_0832	transcript	ONH76733	protein_coding	c.*27G>A	27	,T	intergenic_region	MODIFIER	BOH78_0831-BOH78_0832	BOH78_0831-BOH78_0832	intergenic_region	BOH78_0831-BOH78_0832	n.290233C>T
BOH78_Sc003	293488	G	C	downstream_gene_variant	MODIFIER				BOH78_0833	transcript	ONH76732	protein_coding	c.*469C>G	469	,C	intergenic_region	MODIFIER	BOH78_0832-BOH78_0833	BOH78_0832-BOH78_0833	intergenic_region	BOH78_0832-BOH78_0833	n.293488G>C
BOH78_Sc003	293587	T	C	downstream_gene_variant	MODIFIER				BOH78_0833	transcript	ONH76732	protein_coding	c.*370A>G	370	,C	intergenic_region	MODIFIER	BOH78_0832-BOH78_0833	BOH78_0832-BOH78_0833	intergenic_region	BOH78_0832-BOH78_0833	n.293587T>C
BOH78_Sc003	299138	G	C	downstream_gene_variant	MODIFIER				BOH78_0835	transcript	ONH76734	protein_coding	c.*420C>G	420	,C	intergenic_region	MODIFIER	BOH78_0834-BOH78_0835	BOH78_0834-BOH78_0835	intergenic_region	BOH78_0834-BOH78_0835	n.299138G>C
BOH78_Sc003	299096	T	C	downstream_gene_variant	MODIFIER				BOH78_0835	transcript	ONH76734	protein_coding	c.*462A>G	462	,C	intergenic_region	MODIFIER	BOH78_0834-BOH78_0835	BOH78_0834-BOH78_0835	intergenic_region	BOH78_0834-BOH78_0835	n.299096T>C
BOH78_Sc003	299104	A	G	downstream_gene_variant	MODIFIER				BOH78_0835	transcript	ONH76734	protein_coding	c.*454T>C	454	,G	intergenic_region	MODIFIER	BOH78_0834-BOH78_0835	BOH78_0834-BOH78_0835	intergenic_region	BOH78_0834-BOH78_0835	n.299104A>G
BOH78_Sc003	299458	C	T	downstream_gene_variant	MODIFIER				BOH78_0835	transcript	ONH76734	protein_coding	c.*100G>A	100	,T	intergenic_region	MODIFIER	BOH78_0834-BOH78_0835	BOH78_0834-BOH78_0835	intergenic_region	BOH78_0834-BOH78_0835	n.299458C>T
BOH78_Sc003	299392	A	T	downstream_gene_variant	MODIFIER				BOH78_0835	transcript	ONH76734	protein_coding	c.*166T>A	166	,T	intergenic_region	MODIFIER	BOH78_0834-BOH78_0835	BOH78_0834-BOH78_0835	intergenic_region	BOH78_0834-BOH78_0835	n.299392A>T
BOH78_Sc003	299095	C	T	downstream_gene_variant	MODIFIER				BOH78_0835	transcript	ONH76734	protein_coding	c.*463G>A	463	,T	intergenic_region	MODIFIER	BOH78_0834-BOH78_0835	BOH78_0834-BOH78_0835	intergenic_region	BOH78_0834-BOH78_0835	n.299095C>T
BOH78_Sc003	301017	A	G	downstream_gene_variant	MODIFIER				BOH78_0836	transcript	ONH76737	protein_coding	c.*147A>G	147	,G	intergenic_region	MODIFIER	BOH78_0836-BOH78_0837	BOH78_0836-BOH78_0837	intergenic_region	BOH78_0836-BOH78_0837	n.301017A>G
BOH78_Sc003	300941	A	G	downstream_gene_variant	MODIFIER				BOH78_0836	transcript	ONH76737	protein_coding	c.*71A>G	71	,G	intergenic_region	MODIFIER	BOH78_0836-BOH78_0837	BOH78_0836-BOH78_0837	intergenic_region	BOH78_0836-BOH78_0837	n.300941A>G
BOH78_Sc003	303937	T	G	downstream_gene_variant	MODIFIER				BOH78_0838	transcript	ONH76739	protein_coding	c.*224T>G	224	,G	downstream_gene_variant	MODIFIER	BOH78_0839	BOH78_0839	transcript	ONH76738	protein_coding	c.*37A>C	37	,G	intergenic_region	MODIFIER	BOH78_0838-BOH78_0839	BOH78_0838-BOH78_0839	intergenic_region	BOH78_0838-BOH78_0839	n.303937T>G
BOH78_Sc003	303953	A	G	downstream_gene_variant	MODIFIER				BOH78_0838	transcript	ONH76739	protein_coding	c.*240A>G	240	,G	downstream_gene_variant	MODIFIER	BOH78_0839	BOH78_0839	transcript	ONH76738	protein_coding	c.*21T>C	21	,G	intergenic_region	MODIFIER	BOH78_0838-BOH78_0839	BOH78_0838-BOH78_0839	intergenic_region	BOH78_0838-BOH78_0839	n.303953A>G
BOH78_Sc003	306420	T	C	downstream_gene_variant	MODIFIER				BOH78_0841	transcript	ONH76620	protein_coding	c.*40T>C	40	,C	intergenic_region	MODIFIER	BOH78_0841-BOH78_0842	BOH78_0841-BOH78_0842	intergenic_region	BOH78_0841-BOH78_0842	n.306420T>C
BOH78_Sc003	310349	G	C	downstream_gene_variant	MODIFIER				BOH78_0843	transcript	ONH76622	protein_coding	c.*189G>C	189	,C	intergenic_region	MODIFIER	BOH78_0843-BOH78_0844	BOH78_0843-BOH78_0844	intergenic_region	BOH78_0843-BOH78_0844	n.310349G>C
BOH78_Sc003	317799	T	C	downstream_gene_variant	MODIFIER				BOH78_0846	transcript	ONH76617	protein_coding	c.*226T>C	226	,C	downstream_gene_variant	MODIFIER	BOH78_0847	BOH78_0847	transcript	ONH76618	protein_coding	c.*199A>G	199	,C	intergenic_region	MODIFIER	BOH78_0846-BOH78_0847	BOH78_0846-BOH78_0847	intergenic_region	BOH78_0846-BOH78_0847	n.317799T>C
BOH78_Sc003	317854	A	G	downstream_gene_variant	MODIFIER				BOH78_0846	transcript	ONH76617	protein_coding	c.*281A>G	281	,G	downstream_gene_variant	MODIFIER	BOH78_0847	BOH78_0847	transcript	ONH76618	protein_coding	c.*144T>C	144	,G	intergenic_region	MODIFIER	BOH78_0846-BOH78_0847	BOH78_0846-BOH78_0847	intergenic_region	BOH78_0846-BOH78_0847	n.317854A>G
BOH78_Sc003	330258	A	T	downstream_gene_variant	MODIFIER				BOH78_0852	transcript	ONH76785	protein_coding	c.*200T>A	200	,T	intergenic_region	MODIFIER	BOH78_0851-BOH78_0852	BOH78_0851-BOH78_0852	intergenic_region	BOH78_0851-BOH78_0852	n.330258A>T
BOH78_Sc003	330361	C	A	downstream_gene_variant	MODIFIER				BOH78_0852	transcript	ONH76785	protein_coding	c.*97G>T	97	,A	intergenic_region	MODIFIER	BOH78_0851-BOH78_0852	BOH78_0851-BOH78_0852	intergenic_region	BOH78_0851-BOH78_0852	n.330361C>A
BOH78_Sc003	338123	T	G	downstream_gene_variant	MODIFIER				BOH78_0854	transcript	ONH76625	protein_coding	c.*7T>G	7	,G	downstream_gene_variant	MODIFIER	BOH78_0855	BOH78_0855	transcript	ONH76790	protein_coding	c.*53A>C	53	,G	intergenic_region	MODIFIER	BOH78_0854-BOH78_0855	BOH78_0854-BOH78_0855	intergenic_region	BOH78_0854-BOH78_0855	n.338123T>G
BOH78_Sc003	338120	C	T	downstream_gene_variant	MODIFIER				BOH78_0854	transcript	ONH76625	protein_coding	c.*4C>T	4	,T	downstream_gene_variant	MODIFIER	BOH78_0855	BOH78_0855	transcript	ONH76790	protein_coding	c.*56G>A	56	,T	intergenic_region	MODIFIER	BOH78_0854-BOH78_0855	BOH78_0854-BOH78_0855	intergenic_region	BOH78_0854-BOH78_0855	n.338120C>T
BOH78_Sc003	339415	G	A	downstream_gene_variant	MODIFIER				BOH78_0856	transcript	ONH76789	protein_coding	c.*293C>T	293	,A	intergenic_region	MODIFIER	BOH78_0855-BOH78_0856	BOH78_0855-BOH78_0856	intergenic_region	BOH78_0855-BOH78_0856	n.339415G>A
BOH78_Sc003	339364	T	A	downstream_gene_variant	MODIFIER				BOH78_0856	transcript	ONH76789	protein_coding	c.*344A>T	344	,A	intergenic_region	MODIFIER	BOH78_0855-BOH78_0856	BOH78_0855-BOH78_0856	intergenic_region	BOH78_0855-BOH78_0856	n.339364T>A
BOH78_Sc003	339632	C	T	downstream_gene_variant	MODIFIER				BOH78_0856	transcript	ONH76789	protein_coding	c.*76G>A	76	,T	intergenic_region	MODIFIER	BOH78_0855-BOH78_0856	BOH78_0855-BOH78_0856	intergenic_region	BOH78_0855-BOH78_0856	n.339632C>T
BOH78_Sc003	339270	G	C	downstream_gene_variant	MODIFIER				BOH78_0856	transcript	ONH76789	protein_coding	c.*438C>G	438	,C	intergenic_region	MODIFIER	BOH78_0855-BOH78_0856	BOH78_0855-BOH78_0856	intergenic_region	BOH78_0855-BOH78_0856	n.339270G>C
BOH78_Sc003	345799	T	C	downstream_gene_variant	MODIFIER				BOH78_0857	transcript	ONH76788	protein_coding	c.*118T>C	118	,C	intergenic_region	MODIFIER	BOH78_0857-BOH78_0858	BOH78_0857-BOH78_0858	intergenic_region	BOH78_0857-BOH78_0858	n.345799T>C
BOH78_Sc003	345813	T	C	downstream_gene_variant	MODIFIER				BOH78_0857	transcript	ONH76788	protein_coding	c.*132T>C	132	,C	intergenic_region	MODIFIER	BOH78_0857-BOH78_0858	BOH78_0857-BOH78_0858	intergenic_region	BOH78_0857-BOH78_0858	n.345813T>C
BOH78_Sc003	345740	C	G	downstream_gene_variant	MODIFIER				BOH78_0857	transcript	ONH76788	protein_coding	c.*59C>G	59	,G	intergenic_region	MODIFIER	BOH78_0857-BOH78_0858	BOH78_0857-BOH78_0858	intergenic_region	BOH78_0857-BOH78_0858	n.345740C>G
BOH78_Sc003	345803	C	T	downstream_gene_variant	MODIFIER				BOH78_0857	transcript	ONH76788	protein_coding	c.*122C>T	122	,T	intergenic_region	MODIFIER	BOH78_0857-BOH78_0858	BOH78_0857-BOH78_0858	intergenic_region	BOH78_0857-BOH78_0858	n.345803C>T
BOH78_Sc003	345817	C	T	downstream_gene_variant	MODIFIER				BOH78_0857	transcript	ONH76788	protein_coding	c.*136C>T	136	,T	intergenic_region	MODIFIER	BOH78_0857-BOH78_0858	BOH78_0857-BOH78_0858	intergenic_region	BOH78_0857-BOH78_0858	n.345817C>T
BOH78_Sc003	345705	C	T	downstream_gene_variant	MODIFIER				BOH78_0857	transcript	ONH76788	protein_coding	c.*24C>T	24	,T	intergenic_region	MODIFIER	BOH78_0857-BOH78_0858	BOH78_0857-BOH78_0858	intergenic_region	BOH78_0857-BOH78_0858	n.345705C>T
BOH78_Sc003	350593	G	A	downstream_gene_variant	MODIFIER				BOH78_0860	transcript	ONH76936	protein_coding	c.*347G>A	347	,A	intergenic_region	MODIFIER	BOH78_0860-BOH78_0861	BOH78_0860-BOH78_0861	intergenic_region	BOH78_0860-BOH78_0861	n.350593G>A
BOH78_Sc003	350701	T	A	downstream_gene_variant	MODIFIER				BOH78_0860	transcript	ONH76936	protein_coding	c.*455T>A	455	,A	intergenic_region	MODIFIER	BOH78_0860-BOH78_0861	BOH78_0860-BOH78_0861	intergenic_region	BOH78_0860-BOH78_0861	n.350701T>A
BOH78_Sc003	350548	C	G	downstream_gene_variant	MODIFIER				BOH78_0860	transcript	ONH76936	protein_coding	c.*302C>G	302	,G	intergenic_region	MODIFIER	BOH78_0860-BOH78_0861	BOH78_0860-BOH78_0861	intergenic_region	BOH78_0860-BOH78_0861	n.350548C>G
BOH78_Sc003	350716	A	T	downstream_gene_variant	MODIFIER				BOH78_0860	transcript	ONH76936	protein_coding	c.*470A>T	470	,T	intergenic_region	MODIFIER	BOH78_0860-BOH78_0861	BOH78_0860-BOH78_0861	intergenic_region	BOH78_0860-BOH78_0861	n.350716A>T
BOH78_Sc003	351034	G	A	downstream_gene_variant	MODIFIER				BOH78_0861	transcript	ONH76937	protein_coding	c.*260C>T	260	,A	intergenic_region	MODIFIER	BOH78_0860-BOH78_0861	BOH78_0860-BOH78_0861	intergenic_region	BOH78_0860-BOH78_0861	n.351034G>A
BOH78_Sc003	351273	G	A	downstream_gene_variant	MODIFIER				BOH78_0861	transcript	ONH76937	protein_coding	c.*21C>T	21	,A	intergenic_region	MODIFIER	BOH78_0860-BOH78_0861	BOH78_0860-BOH78_0861	intergenic_region	BOH78_0860-BOH78_0861	n.351273G>A
BOH78_Sc003	351161	A	G	downstream_gene_variant	MODIFIER				BOH78_0861	transcript	ONH76937	protein_coding	c.*133T>C	133	,G	intergenic_region	MODIFIER	BOH78_0860-BOH78_0861	BOH78_0860-BOH78_0861	intergenic_region	BOH78_0860-BOH78_0861	n.351161A>G
BOH78_Sc003	352151	C	T	downstream_gene_variant	MODIFIER				BOH78_0862	transcript	ONH76934	protein_coding	c.*6G>A	6	,T	intergenic_region	MODIFIER	BOH78_0861-BOH78_0862	BOH78_0861-BOH78_0862	intergenic_region	BOH78_0861-BOH78_0862	n.352151C>T
BOH78_Sc003	354518	A	G	downstream_gene_variant	MODIFIER				BOH78_0863	transcript	ONH76935	protein_coding	c.*233A>G	233	,G	downstream_gene_variant	MODIFIER	BOH78_0864	BOH78_0864	transcript	ONH76932	protein_coding	c.*28T>C	28	,G	intergenic_region	MODIFIER	BOH78_0863-BOH78_0864	BOH78_0863-BOH78_0864	intergenic_region	BOH78_0863-BOH78_0864	n.354518A>G
BOH78_Sc003	354297	A	G	downstream_gene_variant	MODIFIER				BOH78_0863	transcript	ONH76935	protein_coding	c.*12A>G	12	,G	downstream_gene_variant	MODIFIER	BOH78_0864	BOH78_0864	transcript	ONH76932	protein_coding	c.*249T>C	249	,G	intergenic_region	MODIFIER	BOH78_0863-BOH78_0864	BOH78_0863-BOH78_0864	intergenic_region	BOH78_0863-BOH78_0864	n.354297A>G
BOH78_Sc003	369149	A	G	downstream_gene_variant	MODIFIER				BOH78_0869	transcript	ONH76929	protein_coding	c.*116A>G	116	,G	downstream_gene_variant	MODIFIER	BOH78_0870	BOH78_0870	transcript	ONH76780	protein_coding	c.*66T>C	66	,G	intergenic_region	MODIFIER	BOH78_0869-BOH78_0870	BOH78_0869-BOH78_0870	intergenic_region	BOH78_0869-BOH78_0870	n.369149A>G
BOH78_Sc003	369158	C	T	downstream_gene_variant	MODIFIER				BOH78_0869	transcript	ONH76929	protein_coding	c.*125C>T	125	,T	downstream_gene_variant	MODIFIER	BOH78_0870	BOH78_0870	transcript	ONH76780	protein_coding	c.*57G>A	57	,T	intergenic_region	MODIFIER	BOH78_0869-BOH78_0870	BOH78_0869-BOH78_0870	intergenic_region	BOH78_0869-BOH78_0870	n.369158C>T
BOH78_Sc003	371871	T	A	downstream_gene_variant	MODIFIER				BOH78_0872	transcript	ONH76782	protein_coding	c.*274A>T	274	,A	intergenic_region	MODIFIER	BOH78_0871-BOH78_0872	BOH78_0871-BOH78_0872	intergenic_region	BOH78_0871-BOH78_0872	n.371871T>A
BOH78_Sc003	372010	A	G	downstream_gene_variant	MODIFIER				BOH78_0872	transcript	ONH76782	protein_coding	c.*135T>C	135	,G	intergenic_region	MODIFIER	BOH78_0871-BOH78_0872	BOH78_0871-BOH78_0872	intergenic_region	BOH78_0871-BOH78_0872	n.372010A>G
BOH78_Sc003	372125	C	T	downstream_gene_variant	MODIFIER				BOH78_0872	transcript	ONH76782	protein_coding	c.*20G>A	20	,T	intergenic_region	MODIFIER	BOH78_0871-BOH78_0872	BOH78_0871-BOH78_0872	intergenic_region	BOH78_0871-BOH78_0872	n.372125C>T
BOH78_Sc003	372085	C	*,T	downstream_gene_variant	MODIFIER				BOH78_0872	transcript	ONH76782	protein_coding	c.*60G>A	60	,T	intergenic_region	MODIFIER	BOH78_0871-BOH78_0872	BOH78_0871-BOH78_0872	intergenic_region	BOH78_0871-BOH78_0872	n.372085C>T
BOH78_Sc003	371914	C	T	downstream_gene_variant	MODIFIER				BOH78_0872	transcript	ONH76782	protein_coding	c.*231G>A	231	,T	intergenic_region	MODIFIER	BOH78_0871-BOH78_0872	BOH78_0871-BOH78_0872	intergenic_region	BOH78_0871-BOH78_0872	n.371914C>T
BOH78_Sc003	380937	T	C	downstream_gene_variant	MODIFIER				BOH78_0876	transcript	ONH76778	protein_coding	c.*76T>C	76	,C	downstream_gene_variant	MODIFIER	BOH78_0877	BOH78_0877	transcript	ONH76777	protein_coding	c.*86A>G	86	,C	intergenic_region	MODIFIER	BOH78_0876-BOH78_0877	BOH78_0876-BOH78_0877	intergenic_region	BOH78_0876-BOH78_0877	n.380937T>C
BOH78_Sc003	383555	T	C	downstream_gene_variant	MODIFIER				BOH78_0878	transcript	ONH76774	protein_coding	c.*224T>C	224	,C	intergenic_region	MODIFIER	BOH78_0878-BOH78_0879	BOH78_0878-BOH78_0879	intergenic_region	BOH78_0878-BOH78_0879	n.383555T>C
BOH78_Sc003	383801	T	A	downstream_gene_variant	MODIFIER				BOH78_0878	transcript	ONH76774	protein_coding	c.*470T>A	470	,A	intergenic_region	MODIFIER	BOH78_0878-BOH78_0879	BOH78_0878-BOH78_0879	intergenic_region	BOH78_0878-BOH78_0879	n.383801T>A
BOH78_Sc003	386603	T	C	downstream_gene_variant	MODIFIER				BOH78_0879	transcript	ONH76773	protein_coding	c.*370T>C	370	,C	intergenic_region	MODIFIER	BOH78_0879-BOH78_0880	BOH78_0879-BOH78_0880	intergenic_region	BOH78_0879-BOH78_0880	n.386603T>C
BOH78_Sc003	386281	A	G	downstream_gene_variant	MODIFIER				BOH78_0879	transcript	ONH76773	protein_coding	c.*48A>G	48	,G	intergenic_region	MODIFIER	BOH78_0879-BOH78_0880	BOH78_0879-BOH78_0880	intergenic_region	BOH78_0879-BOH78_0880	n.386281A>G
BOH78_Sc003	386471	T	C	downstream_gene_variant	MODIFIER				BOH78_0879	transcript	ONH76773	protein_coding	c.*238T>C	238	,C	intergenic_region	MODIFIER	BOH78_0879-BOH78_0880	BOH78_0879-BOH78_0880	intergenic_region	BOH78_0879-BOH78_0880	n.386471T>C
BOH78_Sc003	387543	T	C	downstream_gene_variant	MODIFIER				BOH78_0880	transcript	ONH76853	protein_coding	c.*91T>C	91	,C	downstream_gene_variant	MODIFIER	BOH78_0881	BOH78_0881	transcript	ONH76854	protein_coding	c.*72A>G	72	,C	intergenic_region	MODIFIER	BOH78_0880-BOH78_0881	BOH78_0880-BOH78_0881	intergenic_region	BOH78_0880-BOH78_0881	n.387543T>C
BOH78_Sc003	390608	G	A	downstream_gene_variant	MODIFIER				BOH78_0882	transcript	ONH76855	protein_coding	c.*22C>T	22	,A	intergenic_region	MODIFIER	BOH78_0881-BOH78_0882	BOH78_0881-BOH78_0882	intergenic_region	BOH78_0881-BOH78_0882	n.390608G>A
BOH78_Sc003	390286	G	A	downstream_gene_variant	MODIFIER				BOH78_0882	transcript	ONH76855	protein_coding	c.*344C>T	344	,A	intergenic_region	MODIFIER	BOH78_0881-BOH78_0882	BOH78_0881-BOH78_0882	intergenic_region	BOH78_0881-BOH78_0882	n.390286G>A
BOH78_Sc003	390457	T	A	downstream_gene_variant	MODIFIER				BOH78_0882	transcript	ONH76855	protein_coding	c.*173A>T	173	,A	intergenic_region	MODIFIER	BOH78_0881-BOH78_0882	BOH78_0881-BOH78_0882	intergenic_region	BOH78_0881-BOH78_0882	n.390457T>A
BOH78_Sc003	390474	G	A	downstream_gene_variant	MODIFIER				BOH78_0882	transcript	ONH76855	protein_coding	c.*156C>T	156	,A	intergenic_region	MODIFIER	BOH78_0881-BOH78_0882	BOH78_0881-BOH78_0882	intergenic_region	BOH78_0881-BOH78_0882	n.390474G>A
BOH78_Sc003	397056	C	A	downstream_gene_variant	MODIFIER				BOH78_0883	transcript	ONH76856	protein_coding	c.*403C>A	403	,A	intergenic_region	MODIFIER	BOH78_0883-BOH78_0884	BOH78_0883-BOH78_0884	intergenic_region	BOH78_0883-BOH78_0884	n.397056C>A
BOH78_Sc003	396674	G	A	downstream_gene_variant	MODIFIER				BOH78_0883	transcript	ONH76856	protein_coding	c.*21G>A	21	,A	intergenic_region	MODIFIER	BOH78_0883-BOH78_0884	BOH78_0883-BOH78_0884	intergenic_region	BOH78_0883-BOH78_0884	n.396674G>A
BOH78_Sc003	396855	A	G	downstream_gene_variant	MODIFIER				BOH78_0883	transcript	ONH76856	protein_coding	c.*202A>G	202	,G	intergenic_region	MODIFIER	BOH78_0883-BOH78_0884	BOH78_0883-BOH78_0884	intergenic_region	BOH78_0883-BOH78_0884	n.396855A>G
BOH78_Sc003	399012	C	T	downstream_gene_variant	MODIFIER				BOH78_0884	transcript	ONH76857	protein_coding	c.*191C>T	191	,T	intergenic_region	MODIFIER	BOH78_0884-BOH78_0885	BOH78_0884-BOH78_0885	intergenic_region	BOH78_0884-BOH78_0885	n.399012C>T
BOH78_Sc003	403599	T	A	downstream_gene_variant	MODIFIER				BOH78_0886	transcript	ONH76859	protein_coding	c.*129T>A	129	,A	intergenic_region	MODIFIER	BOH78_0886-BOH78_0887	BOH78_0886-BOH78_0887	intergenic_region	BOH78_0886-BOH78_0887	n.403599T>A
BOH78_Sc003	403728	C	T	downstream_gene_variant	MODIFIER				BOH78_0886	transcript	ONH76859	protein_coding	c.*258C>T	258	,T	intergenic_region	MODIFIER	BOH78_0886-BOH78_0887	BOH78_0886-BOH78_0887	intergenic_region	BOH78_0886-BOH78_0887	n.403728C>T
BOH78_Sc003	403847	C	T	downstream_gene_variant	MODIFIER				BOH78_0886	transcript	ONH76859	protein_coding	c.*377C>T	377	,T	intergenic_region	MODIFIER	BOH78_0886-BOH78_0887	BOH78_0886-BOH78_0887	intergenic_region	BOH78_0886-BOH78_0887	n.403847C>T
BOH78_Sc003	403814	C	T	downstream_gene_variant	MODIFIER				BOH78_0886	transcript	ONH76859	protein_coding	c.*344C>T	344	,T	intergenic_region	MODIFIER	BOH78_0886-BOH78_0887	BOH78_0886-BOH78_0887	intergenic_region	BOH78_0886-BOH78_0887	n.403814C>T
BOH78_Sc003	410238	C	A	downstream_gene_variant	MODIFIER				BOH78_0891	transcript	ONH76682	protein_coding	c.*33C>A	33	,A	downstream_gene_variant	MODIFIER	BOH78_0892	BOH78_0892	transcript	ONH76681	protein_coding	c.*41G>T	41	,A	intergenic_region	MODIFIER	BOH78_0891-BOH78_0892	BOH78_0891-BOH78_0892	intergenic_region	BOH78_0891-BOH78_0892	n.410238C>A
BOH78_Sc003	416166	C	T	downstream_gene_variant	MODIFIER				BOH78_0893	transcript	ONH76680	protein_coding	c.*107C>T	107	,T	downstream_gene_variant	MODIFIER	BOH78_0894	BOH78_0894	transcript	ONH76679	protein_coding	c.*49G>A	49	,T	intergenic_region	MODIFIER	BOH78_0893-BOH78_0894	BOH78_0893-BOH78_0894	intergenic_region	BOH78_0893-BOH78_0894	n.416166C>T
BOH78_Sc003	417241	T	C	downstream_gene_variant	MODIFIER				BOH78_0895	transcript	ONH76678	protein_coding	c.*14A>G	14	,C	intergenic_region	MODIFIER	BOH78_0894-BOH78_0895	BOH78_0894-BOH78_0895	intergenic_region	BOH78_0894-BOH78_0895	n.417241T>C
BOH78_Sc003	422393	A	G	downstream_gene_variant	MODIFIER				BOH78_0898	transcript	ONH76675	protein_coding	c.*5A>G	5	,G	downstream_gene_variant	MODIFIER	BOH78_0899	BOH78_0899	transcript	ONH76674	protein_coding	c.*4T>C	4	,G	intergenic_region	MODIFIER	BOH78_0898-BOH78_0899	BOH78_0898-BOH78_0899	intergenic_region	BOH78_0898-BOH78_0899	n.422393A>G
BOH78_Sc003	431949	G	A	downstream_gene_variant	MODIFIER				BOH78_0903	transcript	ONH76805	protein_coding	c.*142G>A	142	,A	downstream_gene_variant	MODIFIER	BOH78_0904	BOH78_0904	transcript	ONH76808	protein_coding	c.*187C>T	187	,A	intergenic_region	MODIFIER	BOH78_0903-BOH78_0904	BOH78_0903-BOH78_0904	intergenic_region	BOH78_0903-BOH78_0904	n.431949G>A
BOH78_Sc003	439884	C	T	downstream_gene_variant	MODIFIER				BOH78_0907	transcript	ONH76809	protein_coding	c.*326C>T	326	WARNING_TRANSCRIPT_NO_STOP_CODON,T	downstream_gene_variant	MODIFIER	BOH78_0908	BOH78_0908	transcript	ONH76812	protein_coding	c.*225G>A	225	,T	intergenic_region	MODIFIER	BOH78_0907-BOH78_0908	BOH78_0907-BOH78_0908	intergenic_region	BOH78_0907-BOH78_0908	n.439884C>T
BOH78_Sc003	439765	T	A	downstream_gene_variant	MODIFIER				BOH78_0907	transcript	ONH76809	protein_coding	c.*207T>A	207	WARNING_TRANSCRIPT_NO_STOP_CODON,A	downstream_gene_variant	MODIFIER	BOH78_0908	BOH78_0908	transcript	ONH76812	protein_coding	c.*344A>T	344	,A	intergenic_region	MODIFIER	BOH78_0907-BOH78_0908	BOH78_0907-BOH78_0908	intergenic_region	BOH78_0907-BOH78_0908	n.439765T>A
BOH78_Sc003	439816	C	T	downstream_gene_variant	MODIFIER				BOH78_0907	transcript	ONH76809	protein_coding	c.*258C>T	258	WARNING_TRANSCRIPT_NO_STOP_CODON,T	downstream_gene_variant	MODIFIER	BOH78_0908	BOH78_0908	transcript	ONH76812	protein_coding	c.*293G>A	293	,T	intergenic_region	MODIFIER	BOH78_0907-BOH78_0908	BOH78_0907-BOH78_0908	intergenic_region	BOH78_0907-BOH78_0908	n.439816C>T
BOH78_Sc003	439560	T	A	downstream_gene_variant	MODIFIER				BOH78_0907	transcript	ONH76809	protein_coding	c.*2T>A	2	WARNING_TRANSCRIPT_NO_STOP_CODON,A	intergenic_region	MODIFIER	BOH78_0907-BOH78_0908	BOH78_0907-BOH78_0908	intergenic_region	BOH78_0907-BOH78_0908	n.439560T>A
BOH78_Sc003	439964	A	C	downstream_gene_variant	MODIFIER				BOH78_0907	transcript	ONH76809	protein_coding	c.*406A>C	406	WARNING_TRANSCRIPT_NO_STOP_CODON,C	downstream_gene_variant	MODIFIER	BOH78_0908	BOH78_0908	transcript	ONH76812	protein_coding	c.*145T>G	145	,C	intergenic_region	MODIFIER	BOH78_0907-BOH78_0908	BOH78_0907-BOH78_0908	intergenic_region	BOH78_0907-BOH78_0908	n.439964A>C
BOH78_Sc003	439727	T	C	downstream_gene_variant	MODIFIER				BOH78_0907	transcript	ONH76809	protein_coding	c.*169T>C	169	WARNING_TRANSCRIPT_NO_STOP_CODON,C	downstream_gene_variant	MODIFIER	BOH78_0908	BOH78_0908	transcript	ONH76812	protein_coding	c.*382A>G	382	,C	intergenic_region	MODIFIER	BOH78_0907-BOH78_0908	BOH78_0907-BOH78_0908	intergenic_region	BOH78_0907-BOH78_0908	n.439727T>C
BOH78_Sc003	439736	A	G	downstream_gene_variant	MODIFIER				BOH78_0907	transcript	ONH76809	protein_coding	c.*178A>G	178	WARNING_TRANSCRIPT_NO_STOP_CODON,G	downstream_gene_variant	MODIFIER	BOH78_0908	BOH78_0908	transcript	ONH76812	protein_coding	c.*373T>C	373	,G	intergenic_region	MODIFIER	BOH78_0907-BOH78_0908	BOH78_0907-BOH78_0908	intergenic_region	BOH78_0907-BOH78_0908	n.439736A>G
BOH78_Sc003	439740	C	T	downstream_gene_variant	MODIFIER				BOH78_0907	transcript	ONH76809	protein_coding	c.*182C>T	182	WARNING_TRANSCRIPT_NO_STOP_CODON,T	downstream_gene_variant	MODIFIER	BOH78_0908	BOH78_0908	transcript	ONH76812	protein_coding	c.*369G>A	369	,T	intergenic_region	MODIFIER	BOH78_0907-BOH78_0908	BOH78_0907-BOH78_0908	intergenic_region	BOH78_0907-BOH78_0908	n.439740C>T
BOH78_Sc003	439924	A	G	downstream_gene_variant	MODIFIER				BOH78_0907	transcript	ONH76809	protein_coding	c.*366A>G	366	WARNING_TRANSCRIPT_NO_STOP_CODON,G	downstream_gene_variant	MODIFIER	BOH78_0908	BOH78_0908	transcript	ONH76812	protein_coding	c.*185T>C	185	,G	intergenic_region	MODIFIER	BOH78_0907-BOH78_0908	BOH78_0907-BOH78_0908	intergenic_region	BOH78_0907-BOH78_0908	n.439924A>G
BOH78_Sc003	439920	A	G	downstream_gene_variant	MODIFIER				BOH78_0907	transcript	ONH76809	protein_coding	c.*362A>G	362	WARNING_TRANSCRIPT_NO_STOP_CODON,G	downstream_gene_variant	MODIFIER	BOH78_0908	BOH78_0908	transcript	ONH76812	protein_coding	c.*189T>C	189	,G	intergenic_region	MODIFIER	BOH78_0907-BOH78_0908	BOH78_0907-BOH78_0908	intergenic_region	BOH78_0907-BOH78_0908	n.439920A>G
BOH78_Sc003	443441	A	G	downstream_gene_variant	MODIFIER				BOH78_0911	transcript	ONH76750	protein_coding	c.*463A>G	463	,G	intergenic_region	MODIFIER	BOH78_0911-BOH78_0912	BOH78_0911-BOH78_0912	intergenic_region	BOH78_0911-BOH78_0912	n.443441A>G
BOH78_Sc003	443450	T	C	downstream_gene_variant	MODIFIER				BOH78_0911	transcript	ONH76750	protein_coding	c.*472T>C	472	,C	intergenic_region	MODIFIER	BOH78_0911-BOH78_0912	BOH78_0911-BOH78_0912	intergenic_region	BOH78_0911-BOH78_0912	n.443450T>C
BOH78_Sc003	443348	C	T	downstream_gene_variant	MODIFIER				BOH78_0911	transcript	ONH76750	protein_coding	c.*370C>T	370	,T	intergenic_region	MODIFIER	BOH78_0911-BOH78_0912	BOH78_0911-BOH78_0912	intergenic_region	BOH78_0911-BOH78_0912	n.443348C>T
BOH78_Sc003	443363	C	T	downstream_gene_variant	MODIFIER				BOH78_0911	transcript	ONH76750	protein_coding	c.*385C>T	385	,T	intergenic_region	MODIFIER	BOH78_0911-BOH78_0912	BOH78_0911-BOH78_0912	intergenic_region	BOH78_0911-BOH78_0912	n.443363C>T
BOH78_Sc003	449148	T	C	downstream_gene_variant	MODIFIER				BOH78_0912	transcript	ONH76646	protein_coding	c.*484T>C	484	,C	intergenic_region	MODIFIER	BOH78_0912-BOH78_0913	BOH78_0912-BOH78_0913	intergenic_region	BOH78_0912-BOH78_0913	n.449148T>C
BOH78_Sc003	449121	C	T	downstream_gene_variant	MODIFIER				BOH78_0912	transcript	ONH76646	protein_coding	c.*457C>T	457	,T	intergenic_region	MODIFIER	BOH78_0912-BOH78_0913	BOH78_0912-BOH78_0913	intergenic_region	BOH78_0912-BOH78_0913	n.449121C>T
BOH78_Sc003	448675	T	C	downstream_gene_variant	MODIFIER				BOH78_0912	transcript	ONH76646	protein_coding	c.*11T>C	11	,C	intergenic_region	MODIFIER	BOH78_0912-BOH78_0913	BOH78_0912-BOH78_0913	intergenic_region	BOH78_0912-BOH78_0913	n.448675T>C
BOH78_Sc003	448893	G	A	downstream_gene_variant	MODIFIER				BOH78_0912	transcript	ONH76646	protein_coding	c.*229G>A	229	,A	intergenic_region	MODIFIER	BOH78_0912-BOH78_0913	BOH78_0912-BOH78_0913	intergenic_region	BOH78_0912-BOH78_0913	n.448893G>A
BOH78_Sc003	451506	C	T	downstream_gene_variant	MODIFIER				BOH78_0913	transcript	ONH76647	protein_coding	c.*42C>T	42	,T	downstream_gene_variant	MODIFIER	BOH78_0914	BOH78_0914	transcript	ONH76651	protein_coding	c.*50G>A	50	,T	intergenic_region	MODIFIER	BOH78_0913-BOH78_0914	BOH78_0913-BOH78_0914	intergenic_region	BOH78_0913-BOH78_0914	n.451506C>T
BOH78_Sc003	465254	C	A	downstream_gene_variant	MODIFIER				BOH78_0920	transcript	ONH76830	protein_coding	c.*115G>T	115	,A	intergenic_region	MODIFIER	BOH78_0919-BOH78_0920	BOH78_0919-BOH78_0920	intergenic_region	BOH78_0919-BOH78_0920	n.465254C>A
BOH78_Sc003	465050	C	A	downstream_gene_variant	MODIFIER				BOH78_0920	transcript	ONH76830	protein_coding	c.*319G>T	319	,A	intergenic_region	MODIFIER	BOH78_0919-BOH78_0920	BOH78_0919-BOH78_0920	intergenic_region	BOH78_0919-BOH78_0920	n.465050C>A
BOH78_Sc003	464881	A	C	downstream_gene_variant	MODIFIER				BOH78_0920	transcript	ONH76830	protein_coding	c.*488T>G	488	,C	intergenic_region	MODIFIER	BOH78_0919-BOH78_0920	BOH78_0919-BOH78_0920	intergenic_region	BOH78_0919-BOH78_0920	n.464881A>C
BOH78_Sc003	465195	A	G	downstream_gene_variant	MODIFIER				BOH78_0920	transcript	ONH76830	protein_coding	c.*174T>C	174	,G	intergenic_region	MODIFIER	BOH78_0919-BOH78_0920	BOH78_0919-BOH78_0920	intergenic_region	BOH78_0919-BOH78_0920	n.465195A>G
BOH78_Sc003	465291	A	G	downstream_gene_variant	MODIFIER				BOH78_0920	transcript	ONH76830	protein_coding	c.*78T>C	78	,G	intergenic_region	MODIFIER	BOH78_0919-BOH78_0920	BOH78_0919-BOH78_0920	intergenic_region	BOH78_0919-BOH78_0920	n.465291A>G
BOH78_Sc003	465156	G	A	downstream_gene_variant	MODIFIER				BOH78_0920	transcript	ONH76830	protein_coding	c.*213C>T	213	,A	intergenic_region	MODIFIER	BOH78_0919-BOH78_0920	BOH78_0919-BOH78_0920	intergenic_region	BOH78_0919-BOH78_0920	n.465156G>A
BOH78_Sc003	465149	G	A	downstream_gene_variant	MODIFIER				BOH78_0920	transcript	ONH76830	protein_coding	c.*220C>T	220	,A	intergenic_region	MODIFIER	BOH78_0919-BOH78_0920	BOH78_0919-BOH78_0920	intergenic_region	BOH78_0919-BOH78_0920	n.465149G>A
BOH78_Sc003	465067	A	T	downstream_gene_variant	MODIFIER				BOH78_0920	transcript	ONH76830	protein_coding	c.*302T>A	302	,T	intergenic_region	MODIFIER	BOH78_0919-BOH78_0920	BOH78_0919-BOH78_0920	intergenic_region	BOH78_0919-BOH78_0920	n.465067A>T
BOH78_Sc003	464979	T	A	downstream_gene_variant	MODIFIER				BOH78_0920	transcript	ONH76830	protein_coding	c.*390A>T	390	,A	intergenic_region	MODIFIER	BOH78_0919-BOH78_0920	BOH78_0919-BOH78_0920	intergenic_region	BOH78_0919-BOH78_0920	n.464979T>A
BOH78_Sc003	464955	C	A	downstream_gene_variant	MODIFIER				BOH78_0920	transcript	ONH76830	protein_coding	c.*414G>T	414	,A	intergenic_region	MODIFIER	BOH78_0919-BOH78_0920	BOH78_0919-BOH78_0920	intergenic_region	BOH78_0919-BOH78_0920	n.464955C>A
BOH78_Sc003	473827	T	C	downstream_gene_variant	MODIFIER				BOH78_0922	transcript	ONH76828	protein_coding	c.*42T>C	42	,C	downstream_gene_variant	MODIFIER	BOH78_0923	BOH78_0923	transcript	ONH76827	protein_coding	c.*82A>G	82	,C	intergenic_region	MODIFIER	BOH78_0922-BOH78_0923	BOH78_0922-BOH78_0923	intergenic_region	BOH78_0922-BOH78_0923	n.473827T>C
BOH78_Sc003	473847	T	C	downstream_gene_variant	MODIFIER				BOH78_0922	transcript	ONH76828	protein_coding	c.*62T>C	62	,C	downstream_gene_variant	MODIFIER	BOH78_0923	BOH78_0923	transcript	ONH76827	protein_coding	c.*62A>G	62	,C	intergenic_region	MODIFIER	BOH78_0922-BOH78_0923	BOH78_0922-BOH78_0923	intergenic_region	BOH78_0922-BOH78_0923	n.473847T>C
BOH78_Sc003	473805	C	T	downstream_gene_variant	MODIFIER				BOH78_0922	transcript	ONH76828	protein_coding	c.*20C>T	20	,T	downstream_gene_variant	MODIFIER	BOH78_0923	BOH78_0923	transcript	ONH76827	protein_coding	c.*104G>A	104	,T	intergenic_region	MODIFIER	BOH78_0922-BOH78_0923	BOH78_0922-BOH78_0923	intergenic_region	BOH78_0922-BOH78_0923	n.473805C>T
BOH78_Sc003	483662	T	C	downstream_gene_variant	MODIFIER				BOH78_0928	transcript	ONH76832	protein_coding	c.*468T>C	468	,C	intron_variant	MODIFIER	BOH78_0929	BOH78_0929	transcript	ONH76831	protein_coding	2023-01-01	c.193+32T>C
BOH78_Sc003	483665	C	T	downstream_gene_variant	MODIFIER				BOH78_0928	transcript	ONH76832	protein_coding	c.*471C>T	471	,T	intron_variant	MODIFIER	BOH78_0929	BOH78_0929	transcript	ONH76831	protein_coding	2023-01-01	c.193+35C>T
BOH78_Sc003	489740	T	C	downstream_gene_variant	MODIFIER				BOH78_0932	transcript	ONH76668	protein_coding	c.*21T>C	21	,C	downstream_gene_variant	MODIFIER	BOH78_0933	BOH78_0933	transcript	ONH76669	protein_coding	c.*167A>G	167	,C	intergenic_region	MODIFIER	BOH78_0932-BOH78_0933	BOH78_0932-BOH78_0933	intergenic_region	BOH78_0932-BOH78_0933	n.489740T>C
BOH78_Sc003	489876	T	C	downstream_gene_variant	MODIFIER				BOH78_0932	transcript	ONH76668	protein_coding	c.*157T>C	157	,C	downstream_gene_variant	MODIFIER	BOH78_0933	BOH78_0933	transcript	ONH76669	protein_coding	c.*31A>G	31	,C	intergenic_region	MODIFIER	BOH78_0932-BOH78_0933	BOH78_0932-BOH78_0933	intergenic_region	BOH78_0932-BOH78_0933	n.489876T>C
BOH78_Sc003	491248	C	T	downstream_gene_variant	MODIFIER				BOH78_0934	transcript	ONH76670	protein_coding	c.*495G>A	495	,T	intergenic_region	MODIFIER	BOH78_0933-BOH78_0934	BOH78_0933-BOH78_0934	intergenic_region	BOH78_0933-BOH78_0934	n.491248C>T
BOH78_Sc003	513446	T	C	downstream_gene_variant	MODIFIER				BOH78_0943	transcript	ONH76851	protein_coding	c.*323A>G	323	,C	intron_variant	MODIFIER	BOH78_0942	BOH78_0942	transcript	ONH76852	protein_coding	2023-01-01	c.1236-43T>C
BOH78_Sc003	513394	A	G	downstream_gene_variant	MODIFIER				BOH78_0943	transcript	ONH76851	protein_coding	c.*375T>C	375	,G	intron_variant	MODIFIER	BOH78_0942	BOH78_0942	transcript	ONH76852	protein_coding	2023-01-01	c.1236-95A>G
BOH78_Sc003	513346	C	G	downstream_gene_variant	MODIFIER				BOH78_0943	transcript	ONH76851	protein_coding	c.*423G>C	423	,G	intron_variant	MODIFIER	BOH78_0942	BOH78_0942	transcript	ONH76852	protein_coding	2023-01-01	c.1235+142C>G
BOH78_Sc003	513330	T	G	downstream_gene_variant	MODIFIER				BOH78_0943	transcript	ONH76851	protein_coding	c.*439A>C	439	,G	intron_variant	MODIFIER	BOH78_0942	BOH78_0942	transcript	ONH76852	protein_coding	2023-01-01	c.1235+126T>G
BOH78_Sc003	513331	C	A	downstream_gene_variant	MODIFIER				BOH78_0943	transcript	ONH76851	protein_coding	c.*438G>T	438	,A	intron_variant	MODIFIER	BOH78_0942	BOH78_0942	transcript	ONH76852	protein_coding	2023-01-01	c.1235+127C>A
BOH78_Sc003	544542	A	C	downstream_gene_variant	MODIFIER				BOH78_0957	transcript	ONH76697	protein_coding	c.*117A>C	117	,C	downstream_gene_variant	MODIFIER	BOH78_0958	BOH78_0958	transcript	ONH76694	protein_coding	c.*3T>G	3	,C	intergenic_region	MODIFIER	BOH78_0957-BOH78_0958	BOH78_0957-BOH78_0958	intergenic_region	BOH78_0957-BOH78_0958	n.544542A>C
BOH78_Sc003	548221	G	C	downstream_gene_variant	MODIFIER				BOH78_0959	transcript	ONH76695	protein_coding	c.*381C>G	381	,C	intergenic_region	MODIFIER	BOH78_0958-BOH78_0959	BOH78_0958-BOH78_0959	intergenic_region	BOH78_0958-BOH78_0959	n.548221G>C
BOH78_Sc003	605349	T	G	downstream_gene_variant	MODIFIER				BOH78_0982	transcript	ONH76798	protein_coding	c.*100T>G	100	WARNING_TRANSCRIPT_NO_START_CODON,G	downstream_gene_variant	MODIFIER	BOH78_0983	BOH78_0983	transcript	ONH76797	protein_coding	c.*14A>C	14	,G	intergenic_region	MODIFIER	BOH78_0982-BOH78_0983	BOH78_0982-BOH78_0983	intergenic_region	BOH78_0982-BOH78_0983	n.605349T>G
BOH78_Sc003	612297	T	C	downstream_gene_variant	MODIFIER				BOH78_0985	transcript	ONH76799	protein_coding	c.*21T>C	21	,C	downstream_gene_variant	MODIFIER	BOH78_0986	BOH78_0986	transcript	ONH76802	protein_coding	c.*199A>G	199	,C	intergenic_region	MODIFIER	BOH78_0985-BOH78_0986	BOH78_0985-BOH78_0986	intergenic_region	BOH78_0985-BOH78_0986	n.612297T>C
BOH78_Sc003	615754	C	T	downstream_gene_variant	MODIFIER				BOH78_0987	transcript	ONH76801	protein_coding	c.*26C>T	26	,T	downstream_gene_variant	MODIFIER	BOH78_0988	BOH78_0988	transcript	ONH76794	protein_coding	c.*74G>A	74	,T	intergenic_region	MODIFIER	BOH78_0987-BOH78_0988	BOH78_0987-BOH78_0988	intergenic_region	BOH78_0987-BOH78_0988	n.615754C>T
BOH78_Sc003	620470	G	A	downstream_gene_variant	MODIFIER				BOH78_0989	transcript	ONH76793	protein_coding	c.*93G>A	93	,A	downstream_gene_variant	MODIFIER	BOH78_0990	BOH78_0990	transcript	ONH76630	protein_coding	c.*36C>T	36	,A	intergenic_region	MODIFIER	BOH78_0989-BOH78_0990	BOH78_0989-BOH78_0990	intergenic_region	BOH78_0989-BOH78_0990	n.620470G>A
BOH78_Sc003	626881	C	T	downstream_gene_variant	MODIFIER				BOH78_0991	transcript	ONH76631	protein_coding	c.*98C>T	98	,T	downstream_gene_variant	MODIFIER	BOH78_0992	BOH78_0992	transcript	ONH76628	protein_coding	c.*273G>A	273	,T	intergenic_region	MODIFIER	BOH78_0991-BOH78_0992	BOH78_0991-BOH78_0992	intergenic_region	BOH78_0991-BOH78_0992	n.626881C>T
BOH78_Sc003	627126	C	A	downstream_gene_variant	MODIFIER				BOH78_0991	transcript	ONH76631	protein_coding	c.*343C>A	343	,A	downstream_gene_variant	MODIFIER	BOH78_0992	BOH78_0992	transcript	ONH76628	protein_coding	c.*28G>T	28	,A	downstream_gene_variant	MODIFIER	BOH78_0993	BOH78_0993	transcript	ONH76629	protein_coding	c.*361G>T	361	,A	intergenic_region	MODIFIER	BOH78_0991-BOH78_0992	BOH78_0991-BOH78_0992	intergenic_region	BOH78_0991-BOH78_0992	n.627126C>A
BOH78_Sc003	635178	G	T	downstream_gene_variant	MODIFIER				BOH78_0996	transcript	ONH76632	protein_coding	c.*140G>T	140	,T	downstream_gene_variant	MODIFIER	BOH78_0997	BOH78_0997	transcript	ONH76633	protein_coding	c.*460C>A	460	,T	intergenic_region	MODIFIER	BOH78_0996-BOH78_0997	BOH78_0996-BOH78_0997	intergenic_region	BOH78_0996-BOH78_0997	n.635178G>T
BOH78_Sc003	635202	C	T	downstream_gene_variant	MODIFIER				BOH78_0996	transcript	ONH76632	protein_coding	c.*164C>T	164	,T	downstream_gene_variant	MODIFIER	BOH78_0997	BOH78_0997	transcript	ONH76633	protein_coding	c.*436G>A	436	,T	intergenic_region	MODIFIER	BOH78_0996-BOH78_0997	BOH78_0996-BOH78_0997	intergenic_region	BOH78_0996-BOH78_0997	n.635202C>T
BOH78_Sc003	642928	A	G	downstream_gene_variant	MODIFIER				BOH78_1000	transcript	ONH76772	protein_coding	c.*26A>G	26	,G	downstream_gene_variant	MODIFIER	BOH78_1001	BOH78_1001	transcript	ONH76771	protein_coding	c.*159T>C	159	,G	intergenic_region	MODIFIER	BOH78_1000-BOH78_1001	BOH78_1000-BOH78_1001	intergenic_region	BOH78_1000-BOH78_1001	n.642928A>G
BOH78_Sc003	642929	A	C	downstream_gene_variant	MODIFIER				BOH78_1000	transcript	ONH76772	protein_coding	c.*27A>C	27	,C	downstream_gene_variant	MODIFIER	BOH78_1001	BOH78_1001	transcript	ONH76771	protein_coding	c.*158T>G	158	,C	intergenic_region	MODIFIER	BOH78_1000-BOH78_1001	BOH78_1000-BOH78_1001	intergenic_region	BOH78_1000-BOH78_1001	n.642929A>C
BOH78_Sc003	652901	C	A,T	downstream_gene_variant	MODIFIER				BOH78_1006	transcript	ONH76762	protein_coding	c.*197C>A	197	,T	downstream_gene_variant	MODIFIER	BOH78_1006	BOH78_1006	transcript	ONH76762	protein_coding	c.*197C>T	197	,A	downstream_gene_variant	MODIFIER	BOH78_1007	BOH78_1007	transcript	ONH76761	protein_coding	c.*252G>T	252	,T	downstream_gene_variant	MODIFIER	BOH78_1007	BOH78_1007	transcript	ONH76761	protein_coding	c.*252G>A	252	,A	intergenic_region	MODIFIER	BOH78_1006-BOH78_1007	BOH78_1006-BOH78_1007
BOH78_Sc003	652920	C	A	downstream_gene_variant	MODIFIER				BOH78_1006	transcript	ONH76762	protein_coding	c.*216C>A	216	,A	downstream_gene_variant	MODIFIER	BOH78_1007	BOH78_1007	transcript	ONH76761	protein_coding	c.*233G>T	233	,A	intergenic_region	MODIFIER	BOH78_1006-BOH78_1007	BOH78_1006-BOH78_1007	intergenic_region	BOH78_1006-BOH78_1007	n.652920C>A
BOH78_Sc003	652760	G	A	downstream_gene_variant	MODIFIER				BOH78_1006	transcript	ONH76762	protein_coding	c.*56G>A	56	,A	downstream_gene_variant	MODIFIER	BOH78_1007	BOH78_1007	transcript	ONH76761	protein_coding	c.*393C>T	393	,A	intergenic_region	MODIFIER	BOH78_1006-BOH78_1007	BOH78_1006-BOH78_1007	intergenic_region	BOH78_1006-BOH78_1007	n.652760G>A
BOH78_Sc003	652956	C	T	downstream_gene_variant	MODIFIER				BOH78_1006	transcript	ONH76762	protein_coding	c.*252C>T	252	,T	downstream_gene_variant	MODIFIER	BOH78_1007	BOH78_1007	transcript	ONH76761	protein_coding	c.*197G>A	197	,T	intergenic_region	MODIFIER	BOH78_1006-BOH78_1007	BOH78_1006-BOH78_1007	intergenic_region	BOH78_1006-BOH78_1007	n.652956C>T
BOH78_Sc003	652936	T	C	downstream_gene_variant	MODIFIER				BOH78_1006	transcript	ONH76762	protein_coding	c.*232T>C	232	,C	downstream_gene_variant	MODIFIER	BOH78_1007	BOH78_1007	transcript	ONH76761	protein_coding	c.*217A>G	217	,C	intergenic_region	MODIFIER	BOH78_1006-BOH78_1007	BOH78_1006-BOH78_1007	intergenic_region	BOH78_1006-BOH78_1007	n.652936T>C
BOH78_Sc003	660136	T	C	downstream_gene_variant	MODIFIER				BOH78_1010	transcript	ONH76764	protein_coding	c.*292T>C	292	,C	intergenic_region	MODIFIER	BOH78_1010-BOH78_1011	BOH78_1010-BOH78_1011	intergenic_region	BOH78_1010-BOH78_1011	n.660136T>C
BOH78_Sc003	660041	A	G	downstream_gene_variant	MODIFIER				BOH78_1010	transcript	ONH76764	protein_coding	c.*197A>G	197	,G	intergenic_region	MODIFIER	BOH78_1010-BOH78_1011	BOH78_1010-BOH78_1011	intergenic_region	BOH78_1010-BOH78_1011	n.660041A>G
BOH78_Sc003	660274	T	G	downstream_gene_variant	MODIFIER				BOH78_1010	transcript	ONH76764	protein_coding	c.*430T>G	430	,G	intergenic_region	MODIFIER	BOH78_1010-BOH78_1011	BOH78_1010-BOH78_1011	intergenic_region	BOH78_1010-BOH78_1011	n.660274T>G
BOH78_Sc003	666444	G	A	downstream_gene_variant	MODIFIER				BOH78_1012	transcript	ONH76896	protein_coding	c.*32G>A	32	,A	intergenic_region	MODIFIER	BOH78_1012-BOH78_1013	BOH78_1012-BOH78_1013	intergenic_region	BOH78_1012-BOH78_1013	n.666444G>A
BOH78_Sc003	666705	A	T	downstream_gene_variant	MODIFIER				BOH78_1012	transcript	ONH76896	protein_coding	c.*293A>T	293	,T	intergenic_region	MODIFIER	BOH78_1012-BOH78_1013	BOH78_1012-BOH78_1013	intergenic_region	BOH78_1012-BOH78_1013	n.666705A>T
BOH78_Sc003	669975	T	A	downstream_gene_variant	MODIFIER				BOH78_1013	transcript	ONH76898	protein_coding	c.*72T>A	72	,A	intergenic_region	MODIFIER	BOH78_1013-BOH78_1014	BOH78_1013-BOH78_1014	intergenic_region	BOH78_1013-BOH78_1014	n.669975T>A
BOH78_Sc003	675023	T	C	downstream_gene_variant	MODIFIER				BOH78_1014	transcript	ONH76897	protein_coding	c.*99T>C	99	,C	intergenic_region	MODIFIER	BOH78_1014-BOH78_1015	BOH78_1014-BOH78_1015	intergenic_region	BOH78_1014-BOH78_1015	n.675023T>C
BOH78_Sc003	679029	T	C	downstream_gene_variant	MODIFIER				BOH78_1015	transcript	ONH76766	protein_coding	c.*306T>C	306	,C	intergenic_region	MODIFIER	BOH78_1015-BOH78_1016	BOH78_1015-BOH78_1016	intergenic_region	BOH78_1015-BOH78_1016	n.679029T>C
BOH78_Sc003	678741	A	T	downstream_gene_variant	MODIFIER				BOH78_1015	transcript	ONH76766	protein_coding	c.*18A>T	18	,T	intergenic_region	MODIFIER	BOH78_1015-BOH78_1016	BOH78_1015-BOH78_1016	intergenic_region	BOH78_1015-BOH78_1016	n.678741A>T
BOH78_Sc003	678935	C	T	downstream_gene_variant	MODIFIER				BOH78_1015	transcript	ONH76766	protein_coding	c.*212C>T	212	,T	intergenic_region	MODIFIER	BOH78_1015-BOH78_1016	BOH78_1015-BOH78_1016	intergenic_region	BOH78_1015-BOH78_1016	n.678935C>T
BOH78_Sc003	684302	A	G	downstream_gene_variant	MODIFIER				BOH78_1019	transcript	ONH76894	protein_coding	c.*48T>C	48	,G	downstream_gene_variant	MODIFIER	BOH78_1020	BOH78_1020	transcript	ONH76727	protein_coding	c.*487T>C	487	,G	intergenic_region	MODIFIER	BOH78_1018-BOH78_1019	BOH78_1018-BOH78_1019	intergenic_region	BOH78_1018-BOH78_1019	n.684302A>G
BOH78_Sc003	684336	A	G	downstream_gene_variant	MODIFIER				BOH78_1019	transcript	ONH76894	protein_coding	c.*14T>C	14	,G	downstream_gene_variant	MODIFIER	BOH78_1020	BOH78_1020	transcript	ONH76727	protein_coding	c.*453T>C	453	,G	intergenic_region	MODIFIER	BOH78_1018-BOH78_1019	BOH78_1018-BOH78_1019	intergenic_region	BOH78_1018-BOH78_1019	n.684336A>G
BOH78_Sc003	686894	G	A	downstream_gene_variant	MODIFIER				BOH78_1021	transcript	ONH76726	protein_coding	c.*3C>T	3	,A	intergenic_region	MODIFIER	BOH78_1020-BOH78_1021	BOH78_1020-BOH78_1021	intergenic_region	BOH78_1020-BOH78_1021	n.686894G>A
BOH78_Sc003	686890	A	C	downstream_gene_variant	MODIFIER				BOH78_1021	transcript	ONH76726	protein_coding	c.*7T>G	7	,C	intergenic_region	MODIFIER	BOH78_1020-BOH78_1021	BOH78_1020-BOH78_1021	intergenic_region	BOH78_1020-BOH78_1021	n.686890A>C
BOH78_Sc003	689660	G	A	downstream_gene_variant	MODIFIER				BOH78_1022	transcript	ONH76783	protein_coding	c.*376C>T	376	,A	intergenic_region	MODIFIER	BOH78_1021-BOH78_1022	BOH78_1021-BOH78_1022	intergenic_region	BOH78_1021-BOH78_1022	n.689660G>A
BOH78_Sc003	689813	A	G	downstream_gene_variant	MODIFIER				BOH78_1022	transcript	ONH76783	protein_coding	c.*223T>C	223	,G	intergenic_region	MODIFIER	BOH78_1021-BOH78_1022	BOH78_1021-BOH78_1022	intergenic_region	BOH78_1021-BOH78_1022	n.689813A>G
BOH78_Sc003	689720	A	G	downstream_gene_variant	MODIFIER				BOH78_1022	transcript	ONH76783	protein_coding	c.*316T>C	316	,G	intergenic_region	MODIFIER	BOH78_1021-BOH78_1022	BOH78_1021-BOH78_1022	intergenic_region	BOH78_1021-BOH78_1022	n.689720A>G
BOH78_Sc003	692005	C	G	downstream_gene_variant	MODIFIER				BOH78_1023	transcript	ONH76728	protein_coding	c.*289G>C	289	,G	intergenic_region	MODIFIER	BOH78_1022-BOH78_1023	BOH78_1022-BOH78_1023	intergenic_region	BOH78_1022-BOH78_1023	n.692005C>G
BOH78_Sc003	691910	C	T	downstream_gene_variant	MODIFIER				BOH78_1023	transcript	ONH76728	protein_coding	c.*384G>A	384	,T	intergenic_region	MODIFIER	BOH78_1022-BOH78_1023	BOH78_1022-BOH78_1023	intergenic_region	BOH78_1022-BOH78_1023	n.691910C>T
BOH78_Sc004	3016	G	T	downstream_gene_variant	MODIFIER				BOH78_1026	transcript	ONH76224	protein_coding	c.*126C>A	126	,T	intergenic_region	MODIFIER	BOH78_1025-BOH78_1026	BOH78_1025-BOH78_1026	intergenic_region	BOH78_1025-BOH78_1026	n.3016G>T
BOH78_Sc004	2858	G	A	downstream_gene_variant	MODIFIER				BOH78_1026	transcript	ONH76224	protein_coding	c.*284C>T	284	,A	intergenic_region	MODIFIER	BOH78_1025-BOH78_1026	BOH78_1025-BOH78_1026	intergenic_region	BOH78_1025-BOH78_1026	n.2858G>A
BOH78_Sc004	7812	T	G	downstream_gene_variant	MODIFIER				BOH78_1028	transcript	ONH76193	protein_coding	c.*96T>G	96	,G	downstream_gene_variant	MODIFIER	BOH78_1029	BOH78_1029	transcript	ONH76192	protein_coding	c.*57A>C	57	,G	intergenic_region	MODIFIER	BOH78_1028-BOH78_1029	BOH78_1028-BOH78_1029	intergenic_region	BOH78_1028-BOH78_1029	n.7812T>G
BOH78_Sc004	19831	A	G	downstream_gene_variant	MODIFIER				BOH78_1036	transcript	ONH76401	protein_coding	c.*127A>G	127	,G	downstream_gene_variant	MODIFIER	BOH78_1037	BOH78_1037	transcript	ONH76211	protein_coding	c.*33T>C	33	,G	intergenic_region	MODIFIER	BOH78_1036-BOH78_1037	BOH78_1036-BOH78_1037	intergenic_region	BOH78_1036-BOH78_1037	n.19831A>G
BOH78_Sc004	27993	C	A	downstream_gene_variant	MODIFIER				BOH78_1040	transcript	ONH76277	protein_coding	c.*135C>A	135	,A	downstream_gene_variant	MODIFIER	BOH78_1041	BOH78_1041	transcript	ONH76276	protein_coding	c.*103G>T	103	WARNING_TRANSCRIPT_NO_STOP_CODON,A	intergenic_region	MODIFIER	BOH78_1040-BOH78_1041	BOH78_1040-BOH78_1041	intergenic_region	BOH78_1040-BOH78_1041	n.27993C>A
BOH78_Sc004	34895	A	T	downstream_gene_variant	MODIFIER				BOH78_1043	transcript	ONH76274	protein_coding	c.*198A>T	198	,T	downstream_gene_variant	MODIFIER	BOH78_1044	BOH78_1044	transcript	ONH76281	protein_coding	c.*214T>A	214	,T	intergenic_region	MODIFIER	BOH78_1043-BOH78_1044	BOH78_1043-BOH78_1044	intergenic_region	BOH78_1043-BOH78_1044	n.34895A>T
BOH78_Sc004	35013	A	G	downstream_gene_variant	MODIFIER				BOH78_1043	transcript	ONH76274	protein_coding	c.*316A>G	316	,G	downstream_gene_variant	MODIFIER	BOH78_1044	BOH78_1044	transcript	ONH76281	protein_coding	c.*96T>C	96	,G	intergenic_region	MODIFIER	BOH78_1043-BOH78_1044	BOH78_1043-BOH78_1044	intergenic_region	BOH78_1043-BOH78_1044	n.35013A>G
BOH78_Sc004	35087	A	G	downstream_gene_variant	MODIFIER				BOH78_1043	transcript	ONH76274	protein_coding	c.*390A>G	390	,G	downstream_gene_variant	MODIFIER	BOH78_1044	BOH78_1044	transcript	ONH76281	protein_coding	c.*22T>C	22	,G	intergenic_region	MODIFIER	BOH78_1043-BOH78_1044	BOH78_1043-BOH78_1044	intergenic_region	BOH78_1043-BOH78_1044	n.35087A>G
BOH78_Sc004	34783	T	A	downstream_gene_variant	MODIFIER				BOH78_1043	transcript	ONH76274	protein_coding	c.*86T>A	86	,A	downstream_gene_variant	MODIFIER	BOH78_1044	BOH78_1044	transcript	ONH76281	protein_coding	c.*326A>T	326	,A	intergenic_region	MODIFIER	BOH78_1043-BOH78_1044	BOH78_1043-BOH78_1044	intergenic_region	BOH78_1043-BOH78_1044	n.34783T>A
BOH78_Sc004	38019	A	G	downstream_gene_variant	MODIFIER				BOH78_1045	transcript	ONH76280	protein_coding	c.*110A>G	110	,G	downstream_gene_variant	MODIFIER	BOH78_1046	BOH78_1046	transcript	ONH76279	protein_coding	c.*31T>C	31	,G	intergenic_region	MODIFIER	BOH78_1045-BOH78_1046	BOH78_1045-BOH78_1046	intergenic_region	BOH78_1045-BOH78_1046	n.38019A>G
BOH78_Sc004	48656	T	C	downstream_gene_variant	MODIFIER				BOH78_1050	transcript	ONH76465	protein_coding	c.*143T>C	143	,C	downstream_gene_variant	MODIFIER	BOH78_1051	BOH78_1051	transcript	ONH76466	protein_coding	c.*19A>G	19	,C	intergenic_region	MODIFIER	BOH78_1050-BOH78_1051	BOH78_1050-BOH78_1051	intergenic_region	BOH78_1050-BOH78_1051	n.48656T>C
BOH78_Sc004	50328	C	T	downstream_gene_variant	MODIFIER				BOH78_1052	transcript	ONH76467	protein_coding	c.*134C>T	134	,T	downstream_gene_variant	MODIFIER	BOH78_1053	BOH78_1053	transcript	ONH76468	protein_coding	c.*3G>A	3	,T	intergenic_region	MODIFIER	BOH78_1052-BOH78_1053	BOH78_1052-BOH78_1053	intergenic_region	BOH78_1052-BOH78_1053	n.50328C>T
BOH78_Sc004	55916	G	A	downstream_gene_variant	MODIFIER				BOH78_1055	transcript	ONH76462	protein_coding	c.*375C>T	375	,A	intergenic_region	MODIFIER	BOH78_1054-BOH78_1055	BOH78_1054-BOH78_1055	intergenic_region	BOH78_1054-BOH78_1055	n.55916G>A
BOH78_Sc004	55910	G	A	downstream_gene_variant	MODIFIER				BOH78_1055	transcript	ONH76462	protein_coding	c.*381C>T	381	,A	intergenic_region	MODIFIER	BOH78_1054-BOH78_1055	BOH78_1054-BOH78_1055	intergenic_region	BOH78_1054-BOH78_1055	n.55910G>A
BOH78_Sc004	56280	T	C	downstream_gene_variant	MODIFIER				BOH78_1055	transcript	ONH76462	protein_coding	c.*11A>G	11	,C	intergenic_region	MODIFIER	BOH78_1054-BOH78_1055	BOH78_1054-BOH78_1055	intergenic_region	BOH78_1054-BOH78_1055	n.56280T>C
BOH78_Sc004	56141	C	G	downstream_gene_variant	MODIFIER				BOH78_1055	transcript	ONH76462	protein_coding	c.*150G>C	150	,G	intergenic_region	MODIFIER	BOH78_1054-BOH78_1055	BOH78_1054-BOH78_1055	intergenic_region	BOH78_1054-BOH78_1055	n.56141C>G
BOH78_Sc004	56247	A	G	downstream_gene_variant	MODIFIER				BOH78_1055	transcript	ONH76462	protein_coding	c.*44T>C	44	,G	intergenic_region	MODIFIER	BOH78_1054-BOH78_1055	BOH78_1054-BOH78_1055	intergenic_region	BOH78_1054-BOH78_1055	n.56247A>G
BOH78_Sc004	55821	C	G	downstream_gene_variant	MODIFIER				BOH78_1055	transcript	ONH76462	protein_coding	c.*470G>C	470	,G	intergenic_region	MODIFIER	BOH78_1054-BOH78_1055	BOH78_1054-BOH78_1055	intergenic_region	BOH78_1054-BOH78_1055	n.55821C>G
BOH78_Sc004	56112	C	T	downstream_gene_variant	MODIFIER				BOH78_1055	transcript	ONH76462	protein_coding	c.*179G>A	179	,T	intergenic_region	MODIFIER	BOH78_1054-BOH78_1055	BOH78_1054-BOH78_1055	intergenic_region	BOH78_1054-BOH78_1055	n.56112C>T
BOH78_Sc004	59499	A	G	downstream_gene_variant	MODIFIER				BOH78_1056	transcript	ONH76463	protein_coding	c.*158T>C	158	,G	intergenic_region	MODIFIER	BOH78_1055-BOH78_1056	BOH78_1055-BOH78_1056	intergenic_region	BOH78_1055-BOH78_1056	n.59499A>G
BOH78_Sc004	71588	C	T	downstream_gene_variant	MODIFIER				BOH78_1061	transcript	ONH76262	protein_coding	c.*76C>T	76	,T	downstream_gene_variant	MODIFIER	BOH78_1062	BOH78_1062	transcript	ONH76329	protein_coding	c.*106G>A	106	,T	intergenic_region	MODIFIER	BOH78_1061-BOH78_1062	BOH78_1061-BOH78_1062	intergenic_region	BOH78_1061-BOH78_1062	n.71588C>T
BOH78_Sc004	71528	T	A	downstream_gene_variant	MODIFIER				BOH78_1061	transcript	ONH76262	protein_coding	c.*16T>A	16	,A	downstream_gene_variant	MODIFIER	BOH78_1062	BOH78_1062	transcript	ONH76329	protein_coding	c.*166A>T	166	,A	intergenic_region	MODIFIER	BOH78_1061-BOH78_1062	BOH78_1061-BOH78_1062	intergenic_region	BOH78_1061-BOH78_1062	n.71528T>A
BOH78_Sc004	80139	T	A	downstream_gene_variant	MODIFIER				BOH78_1065	transcript	ONH76324	protein_coding	c.*73T>A	73	,A	downstream_gene_variant	MODIFIER	BOH78_1066	BOH78_1066	transcript	ONH76326	protein_coding	c.*74A>T	74	,A	intergenic_region	MODIFIER	BOH78_1065-BOH78_1066	BOH78_1065-BOH78_1066	intergenic_region	BOH78_1065-BOH78_1066	n.80139T>A
BOH78_Sc004	84326	C	A	downstream_gene_variant	MODIFIER				BOH78_1067	transcript	ONH76325	protein_coding	c.*370G>T	370	,A	intron_variant	MODIFIER	BOH78_1066	BOH78_1066	transcript	ONH76326	protein_coding	2023-01-01	c.74+23G>T
BOH78_Sc004	84306	G	A	downstream_gene_variant	MODIFIER				BOH78_1067	transcript	ONH76325	protein_coding	c.*390C>T	390	,A	intron_variant	MODIFIER	BOH78_1066	BOH78_1066	transcript	ONH76326	protein_coding	2023-01-01	c.74+43C>T
BOH78_Sc004	84196	G	A	downstream_gene_variant	MODIFIER				BOH78_1067	transcript	ONH76325	protein_coding	c.*500C>T	500	,A	intron_variant	MODIFIER	BOH78_1066	BOH78_1066	transcript	ONH76326	protein_coding	2023-01-01	c.74+153C>T
BOH78_Sc004	85977	G	A	downstream_gene_variant	MODIFIER				BOH78_1068	transcript	ONH76260	protein_coding	c.*237C>T	237	,A	intergenic_region	MODIFIER	BOH78_1067-BOH78_1068	BOH78_1067-BOH78_1068	intergenic_region	BOH78_1067-BOH78_1068	n.85977G>A
BOH78_Sc004	85907	C	A	downstream_gene_variant	MODIFIER				BOH78_1068	transcript	ONH76260	protein_coding	c.*307G>T	307	,A	intergenic_region	MODIFIER	BOH78_1067-BOH78_1068	BOH78_1067-BOH78_1068	intergenic_region	BOH78_1067-BOH78_1068	n.85907C>A
BOH78_Sc004	85807	T	C	downstream_gene_variant	MODIFIER				BOH78_1068	transcript	ONH76260	protein_coding	c.*407A>G	407	,C	intergenic_region	MODIFIER	BOH78_1067-BOH78_1068	BOH78_1067-BOH78_1068	intergenic_region	BOH78_1067-BOH78_1068	n.85807T>C
BOH78_Sc004	86210	A	G	downstream_gene_variant	MODIFIER				BOH78_1068	transcript	ONH76260	protein_coding	c.*4T>C	4	,G	intergenic_region	MODIFIER	BOH78_1067-BOH78_1068	BOH78_1067-BOH78_1068	intergenic_region	BOH78_1067-BOH78_1068	n.86210A>G
BOH78_Sc004	85942	C	T	downstream_gene_variant	MODIFIER				BOH78_1068	transcript	ONH76260	protein_coding	c.*272G>A	272	,T	intergenic_region	MODIFIER	BOH78_1067-BOH78_1068	BOH78_1067-BOH78_1068	intergenic_region	BOH78_1067-BOH78_1068	n.85942C>T
BOH78_Sc004	86067	C	A	downstream_gene_variant	MODIFIER				BOH78_1068	transcript	ONH76260	protein_coding	c.*147G>T	147	,A	intergenic_region	MODIFIER	BOH78_1067-BOH78_1068	BOH78_1067-BOH78_1068	intergenic_region	BOH78_1067-BOH78_1068	n.86067C>A
BOH78_Sc004	86062	T	A	downstream_gene_variant	MODIFIER				BOH78_1068	transcript	ONH76260	protein_coding	c.*152A>T	152	,A	intergenic_region	MODIFIER	BOH78_1067-BOH78_1068	BOH78_1067-BOH78_1068	intergenic_region	BOH78_1067-BOH78_1068	n.86062T>A
BOH78_Sc004	100660	C	T	downstream_gene_variant	MODIFIER				BOH78_1076	transcript	ONH76432	protein_coding	c.*13C>T	13	,T	downstream_gene_variant	MODIFIER	BOH78_1077	BOH78_1077	transcript	ONH76355	protein_coding	c.*206G>A	206	,T	intergenic_region	MODIFIER	BOH78_1076-BOH78_1077	BOH78_1076-BOH78_1077	intergenic_region	BOH78_1076-BOH78_1077	n.100660C>T
BOH78_Sc004	100841	T	C	downstream_gene_variant	MODIFIER				BOH78_1076	transcript	ONH76432	protein_coding	c.*194T>C	194	,C	downstream_gene_variant	MODIFIER	BOH78_1077	BOH78_1077	transcript	ONH76355	protein_coding	c.*25A>G	25	,C	intergenic_region	MODIFIER	BOH78_1076-BOH78_1077	BOH78_1076-BOH78_1077	intergenic_region	BOH78_1076-BOH78_1077	n.100841T>C
BOH78_Sc004	113242	T	C	downstream_gene_variant	MODIFIER				BOH78_1079	transcript	ONH76431	protein_coding	c.*11T>C	11	,C	downstream_gene_variant	MODIFIER	BOH78_1080	BOH78_1080	transcript	ONH76222	protein_coding	c.*237A>G	237	,C	intergenic_region	MODIFIER	BOH78_1079-BOH78_1080	BOH78_1079-BOH78_1080	intergenic_region	BOH78_1079-BOH78_1080	n.113242T>C
BOH78_Sc004	113330	A	T	downstream_gene_variant	MODIFIER				BOH78_1079	transcript	ONH76431	protein_coding	c.*99A>T	99	,T	downstream_gene_variant	MODIFIER	BOH78_1080	BOH78_1080	transcript	ONH76222	protein_coding	c.*149T>A	149	,T	intergenic_region	MODIFIER	BOH78_1079-BOH78_1080	BOH78_1079-BOH78_1080	intergenic_region	BOH78_1079-BOH78_1080	n.113330A>T
BOH78_Sc004	115279	T	C	downstream_gene_variant	MODIFIER				BOH78_1081	transcript	ONH76221	protein_coding	c.*269A>G	269	,C	intergenic_region	MODIFIER	BOH78_1080-BOH78_1081	BOH78_1080-BOH78_1081	intergenic_region	BOH78_1080-BOH78_1081	n.115279T>C
BOH78_Sc004	115435	A	C	downstream_gene_variant	MODIFIER				BOH78_1081	transcript	ONH76221	protein_coding	c.*113T>G	113	,C	intergenic_region	MODIFIER	BOH78_1080-BOH78_1081	BOH78_1080-BOH78_1081	intergenic_region	BOH78_1080-BOH78_1081	n.115435A>C
BOH78_Sc004	115459	A	G	downstream_gene_variant	MODIFIER				BOH78_1081	transcript	ONH76221	protein_coding	c.*89T>C	89	,G	intergenic_region	MODIFIER	BOH78_1080-BOH78_1081	BOH78_1080-BOH78_1081	intergenic_region	BOH78_1080-BOH78_1081	n.115459A>G
BOH78_Sc004	135535	C	T	downstream_gene_variant	MODIFIER				BOH78_1085	transcript	ONH76217	protein_coding	c.*76C>T	76	,T	downstream_gene_variant	MODIFIER	BOH78_1086	BOH78_1086	transcript	ONH76216	protein_coding	c.*186G>A	186	,T	intergenic_region	MODIFIER	BOH78_1085-BOH78_1086	BOH78_1085-BOH78_1086	intergenic_region	BOH78_1085-BOH78_1086	n.135535C>T
BOH78_Sc004	135501	C	T	downstream_gene_variant	MODIFIER				BOH78_1085	transcript	ONH76217	protein_coding	c.*42C>T	42	,T	downstream_gene_variant	MODIFIER	BOH78_1086	BOH78_1086	transcript	ONH76216	protein_coding	c.*220G>A	220	,T	intergenic_region	MODIFIER	BOH78_1085-BOH78_1086	BOH78_1085-BOH78_1086	intergenic_region	BOH78_1085-BOH78_1086	n.135501C>T
BOH78_Sc004	145473	A	C	downstream_gene_variant	MODIFIER				BOH78_1090	transcript	ONH76372	protein_coding	c.*240T>G	240	,C	intergenic_region	MODIFIER	BOH78_1089-BOH78_1090	BOH78_1089-BOH78_1090	intergenic_region	BOH78_1089-BOH78_1090	n.145473A>C
BOH78_Sc004	145372	A	G	downstream_gene_variant	MODIFIER				BOH78_1090	transcript	ONH76372	protein_coding	c.*341T>C	341	,G	intergenic_region	MODIFIER	BOH78_1089-BOH78_1090	BOH78_1089-BOH78_1090	intergenic_region	BOH78_1089-BOH78_1090	n.145372A>G
BOH78_Sc004	145353	C	T	downstream_gene_variant	MODIFIER				BOH78_1090	transcript	ONH76372	protein_coding	c.*360G>A	360	,T	intergenic_region	MODIFIER	BOH78_1089-BOH78_1090	BOH78_1089-BOH78_1090	intergenic_region	BOH78_1089-BOH78_1090	n.145353C>T
BOH78_Sc004	145316	C	T	downstream_gene_variant	MODIFIER				BOH78_1090	transcript	ONH76372	protein_coding	c.*397G>A	397	,T	intergenic_region	MODIFIER	BOH78_1089-BOH78_1090	BOH78_1089-BOH78_1090	intergenic_region	BOH78_1089-BOH78_1090	n.145316C>T
BOH78_Sc004	145607	T	C	downstream_gene_variant	MODIFIER				BOH78_1090	transcript	ONH76372	protein_coding	c.*106A>G	106	,C	intergenic_region	MODIFIER	BOH78_1089-BOH78_1090	BOH78_1089-BOH78_1090	intergenic_region	BOH78_1089-BOH78_1090	n.145607T>C
BOH78_Sc004	145301	C	T	downstream_gene_variant	MODIFIER				BOH78_1090	transcript	ONH76372	protein_coding	c.*412G>A	412	,T	intergenic_region	MODIFIER	BOH78_1089-BOH78_1090	BOH78_1089-BOH78_1090	intergenic_region	BOH78_1089-BOH78_1090	n.145301C>T
BOH78_Sc004	145696	G	A	downstream_gene_variant	MODIFIER				BOH78_1090	transcript	ONH76372	protein_coding	c.*17C>T	17	,A	intergenic_region	MODIFIER	BOH78_1089-BOH78_1090	BOH78_1089-BOH78_1090	intergenic_region	BOH78_1089-BOH78_1090	n.145696G>A
BOH78_Sc004	147250	A	T	downstream_gene_variant	MODIFIER				BOH78_1091	transcript	ONH76373	protein_coding	c.*251T>A	251	,T	intron_variant	MODIFIER	BOH78_1090	BOH78_1090	transcript	ONH76372	protein_coding	2023-01-01	c.47+45T>A
BOH78_Sc004	153102	G	T	downstream_gene_variant	MODIFIER				BOH78_1093	transcript	ONH76375	protein_coding	c.*68G>T	68	,T	downstream_gene_variant	MODIFIER	BOH78_1094	BOH78_1094	transcript	ONH76376	protein_coding	c.*17C>A	17	,T	intergenic_region	MODIFIER	BOH78_1093-BOH78_1094	BOH78_1093-BOH78_1094	intergenic_region	BOH78_1093-BOH78_1094	n.153102G>T
BOH78_Sc004	173970	A	T	downstream_gene_variant	MODIFIER				BOH78_1104	transcript	ONH76367	protein_coding	c.*173A>T	173	,T	downstream_gene_variant	MODIFIER	BOH78_1105	BOH78_1105	transcript	ONH76368	protein_coding	c.*43T>A	43	,T	intergenic_region	MODIFIER	BOH78_1104-BOH78_1105	BOH78_1104-BOH78_1105	intergenic_region	BOH78_1104-BOH78_1105	n.173970A>T
BOH78_Sc004	173971	G	T	downstream_gene_variant	MODIFIER				BOH78_1104	transcript	ONH76367	protein_coding	c.*174G>T	174	,T	downstream_gene_variant	MODIFIER	BOH78_1105	BOH78_1105	transcript	ONH76368	protein_coding	c.*42C>A	42	,T	intergenic_region	MODIFIER	BOH78_1104-BOH78_1105	BOH78_1104-BOH78_1105	intergenic_region	BOH78_1104-BOH78_1105	n.173971G>T
BOH78_Sc004	177795	C	T	downstream_gene_variant	MODIFIER				BOH78_1106	transcript	ONH76365	protein_coding	c.*87C>T	87	,T	intergenic_region	MODIFIER	BOH78_1106-BOH78_1107	BOH78_1106-BOH78_1107	intergenic_region	BOH78_1106-BOH78_1107	n.177795C>T
BOH78_Sc004	179682	A	T	downstream_gene_variant	MODIFIER				BOH78_1107	transcript	ONH76366	protein_coding	c.*130A>T	130	,T	downstream_gene_variant	MODIFIER	BOH78_1108	BOH78_1108	transcript	ONH76363	protein_coding	c.*8T>A	8	,T	intergenic_region	MODIFIER	BOH78_1107-BOH78_1108	BOH78_1107-BOH78_1108	intergenic_region	BOH78_1107-BOH78_1108	n.179682A>T
BOH78_Sc004	179645	C	T	downstream_gene_variant	MODIFIER				BOH78_1107	transcript	ONH76366	protein_coding	c.*93C>T	93	,T	downstream_gene_variant	MODIFIER	BOH78_1108	BOH78_1108	transcript	ONH76363	protein_coding	c.*45G>A	45	,T	intergenic_region	MODIFIER	BOH78_1107-BOH78_1108	BOH78_1107-BOH78_1108	intergenic_region	BOH78_1107-BOH78_1108	n.179645C>T
BOH78_Sc004	179659	T	A	downstream_gene_variant	MODIFIER				BOH78_1107	transcript	ONH76366	protein_coding	c.*107T>A	107	,A	downstream_gene_variant	MODIFIER	BOH78_1108	BOH78_1108	transcript	ONH76363	protein_coding	c.*31A>T	31	,A	intergenic_region	MODIFIER	BOH78_1107-BOH78_1108	BOH78_1107-BOH78_1108	intergenic_region	BOH78_1107-BOH78_1108	n.179659T>A
BOH78_Sc004	190733	T	C	downstream_gene_variant	MODIFIER				BOH78_1112	transcript	ONH76346	protein_coding	c.*1A>G	1	,C	intergenic_region	MODIFIER	BOH78_1111-BOH78_1112	BOH78_1111-BOH78_1112	intergenic_region	BOH78_1111-BOH78_1112	n.190733T>C
BOH78_Sc004	190492	T	C	downstream_gene_variant	MODIFIER				BOH78_1112	transcript	ONH76346	protein_coding	c.*242A>G	242	,C	intergenic_region	MODIFIER	BOH78_1111-BOH78_1112	BOH78_1111-BOH78_1112	intergenic_region	BOH78_1111-BOH78_1112	n.190492T>C
BOH78_Sc004	190251	C	A	downstream_gene_variant	MODIFIER				BOH78_1112	transcript	ONH76346	protein_coding	c.*483G>T	483	,A	intergenic_region	MODIFIER	BOH78_1111-BOH78_1112	BOH78_1111-BOH78_1112	intergenic_region	BOH78_1111-BOH78_1112	n.190251C>A
BOH78_Sc004	193149	C	T	downstream_gene_variant	MODIFIER				BOH78_1113	transcript	ONH76345	protein_coding	c.*27C>T	27	,T	intergenic_region	MODIFIER	BOH78_1113-BOH78_1114	BOH78_1113-BOH78_1114	intergenic_region	BOH78_1113-BOH78_1114	n.193149C>T
BOH78_Sc004	193290	A	G	downstream_gene_variant	MODIFIER				BOH78_1113	transcript	ONH76345	protein_coding	c.*168A>G	168	,G	intergenic_region	MODIFIER	BOH78_1113-BOH78_1114	BOH78_1113-BOH78_1114	intergenic_region	BOH78_1113-BOH78_1114	n.193290A>G
BOH78_Sc004	193754	G	A	downstream_gene_variant	MODIFIER				BOH78_1114	transcript	ONH76340	protein_coding	c.*384C>T	384	,A	intergenic_region	MODIFIER	BOH78_1113-BOH78_1114	BOH78_1113-BOH78_1114	intergenic_region	BOH78_1113-BOH78_1114	n.193754G>A
BOH78_Sc004	193770	A	G	downstream_gene_variant	MODIFIER				BOH78_1114	transcript	ONH76340	protein_coding	c.*368T>C	368	,G	intergenic_region	MODIFIER	BOH78_1113-BOH78_1114	BOH78_1113-BOH78_1114	intergenic_region	BOH78_1113-BOH78_1114	n.193770A>G
BOH78_Sc004	194128	T	C	downstream_gene_variant	MODIFIER				BOH78_1114	transcript	ONH76340	protein_coding	c.*10A>G	10	,C	intergenic_region	MODIFIER	BOH78_1113-BOH78_1114	BOH78_1113-BOH78_1114	intergenic_region	BOH78_1113-BOH78_1114	n.194128T>C
BOH78_Sc004	204321	T	C	downstream_gene_variant	MODIFIER				BOH78_1119	transcript	ONH76338	protein_coding	c.*218T>C	218	,C	intergenic_region	MODIFIER	BOH78_1119-BOH78_1120	BOH78_1119-BOH78_1120	intergenic_region	BOH78_1119-BOH78_1120	n.204321T>C
BOH78_Sc004	204126	T	C	downstream_gene_variant	MODIFIER				BOH78_1119	transcript	ONH76338	protein_coding	c.*23T>C	23	,C	intergenic_region	MODIFIER	BOH78_1119-BOH78_1120	BOH78_1119-BOH78_1120	intergenic_region	BOH78_1119-BOH78_1120	n.204126T>C
BOH78_Sc004	206148	G	A	downstream_gene_variant	MODIFIER				BOH78_1120	transcript	ONH76360	protein_coding	c.*56G>A	56	,A	downstream_gene_variant	MODIFIER	BOH78_1121	BOH78_1121	transcript	ONH76418	protein_coding	c.*90C>T	90	,A	intergenic_region	MODIFIER	BOH78_1120-BOH78_1121	BOH78_1120-BOH78_1121	intergenic_region	BOH78_1120-BOH78_1121	n.206148G>A
BOH78_Sc004	215578	G	A	downstream_gene_variant	MODIFIER				BOH78_1125	transcript	ONH76357	protein_coding	c.*3G>A	3	,A	intergenic_region	MODIFIER	BOH78_1125-BOH78_1126	BOH78_1125-BOH78_1126	intergenic_region	BOH78_1125-BOH78_1126	n.215578G>A
BOH78_Sc004	238776	T	A	downstream_gene_variant	MODIFIER				BOH78_1131	transcript	ONH76384	protein_coding	c.*233T>A	233	,A	downstream_gene_variant	MODIFIER	BOH78_1132	BOH78_1132	transcript	ONH76194	protein_coding	c.*17A>T	17	,A	intergenic_region	MODIFIER	BOH78_1131-BOH78_1132	BOH78_1131-BOH78_1132	intergenic_region	BOH78_1131-BOH78_1132	n.238776T>A
BOH78_Sc004	238313	C	T	downstream_gene_variant	MODIFIER				BOH78_1132	transcript	ONH76194	protein_coding	c.*480G>A	480	,T	intron_variant	MODIFIER	BOH78_1131	BOH78_1131	transcript	ONH76384	protein_coding	2023-01-01	c.2582-115C>T
BOH78_Sc004	248135	T	A	downstream_gene_variant	MODIFIER				BOH78_1136	transcript	ONH76398	protein_coding	c.*323T>A	323	,A	intergenic_region	MODIFIER	BOH78_1136-BOH78_1137	BOH78_1136-BOH78_1137	intergenic_region	BOH78_1136-BOH78_1137	n.248135T>A
BOH78_Sc004	248109	A	G	downstream_gene_variant	MODIFIER				BOH78_1136	transcript	ONH76398	protein_coding	c.*297A>G	297	,G	intergenic_region	MODIFIER	BOH78_1136-BOH78_1137	BOH78_1136-BOH78_1137	intergenic_region	BOH78_1136-BOH78_1137	n.248109A>G
BOH78_Sc004	247903	A	G	downstream_gene_variant	MODIFIER				BOH78_1136	transcript	ONH76398	protein_coding	c.*91A>G	91	,G	intergenic_region	MODIFIER	BOH78_1136-BOH78_1137	BOH78_1136-BOH78_1137	intergenic_region	BOH78_1136-BOH78_1137	n.247903A>G
BOH78_Sc004	254185	C	T	downstream_gene_variant	MODIFIER				BOH78_1137	transcript	ONH76196	protein_coding	c.*228C>T	228	,T	intergenic_region	MODIFIER	BOH78_1137-BOH78_1138	BOH78_1137-BOH78_1138	intergenic_region	BOH78_1137-BOH78_1138	n.254185C>T
BOH78_Sc004	254381	T	G	downstream_gene_variant	MODIFIER				BOH78_1137	transcript	ONH76196	protein_coding	c.*424T>G	424	,G	intergenic_region	MODIFIER	BOH78_1137-BOH78_1138	BOH78_1137-BOH78_1138	intergenic_region	BOH78_1137-BOH78_1138	n.254381T>G
BOH78_Sc004	270179	T	C	downstream_gene_variant	MODIFIER				BOH78_1145	transcript	ONH76292	protein_coding	c.*317T>C	317	,C	downstream_gene_variant	MODIFIER	BOH78_1146	BOH78_1146	transcript	ONH76289	protein_coding	c.*163A>G	163	,C	intergenic_region	MODIFIER	BOH78_1145-BOH78_1146	BOH78_1145-BOH78_1146	intergenic_region	BOH78_1145-BOH78_1146	n.270179T>C
BOH78_Sc004	270134	C	T	downstream_gene_variant	MODIFIER				BOH78_1145	transcript	ONH76292	protein_coding	c.*272C>T	272	,T	downstream_gene_variant	MODIFIER	BOH78_1146	BOH78_1146	transcript	ONH76289	protein_coding	c.*208G>A	208	,T	intergenic_region	MODIFIER	BOH78_1145-BOH78_1146	BOH78_1145-BOH78_1146	intergenic_region	BOH78_1145-BOH78_1146	n.270134C>T
BOH78_Sc004	280815	G	A	downstream_gene_variant	MODIFIER				BOH78_1151	transcript	ONH76202	protein_coding	c.*190G>A	190	,A	intergenic_region	MODIFIER	BOH78_1151-BOH78_1152	BOH78_1151-BOH78_1152	intergenic_region	BOH78_1151-BOH78_1152	n.280815G>A
BOH78_Sc004	280883	G	A	downstream_gene_variant	MODIFIER				BOH78_1151	transcript	ONH76202	protein_coding	c.*258G>A	258	,A	intergenic_region	MODIFIER	BOH78_1151-BOH78_1152	BOH78_1151-BOH78_1152	intergenic_region	BOH78_1151-BOH78_1152	n.280883G>A
BOH78_Sc004	280747	C	T	downstream_gene_variant	MODIFIER				BOH78_1151	transcript	ONH76202	protein_coding	c.*122C>T	122	,T	intergenic_region	MODIFIER	BOH78_1151-BOH78_1152	BOH78_1151-BOH78_1152	intergenic_region	BOH78_1151-BOH78_1152	n.280747C>T
BOH78_Sc004	280791	A	G	downstream_gene_variant	MODIFIER				BOH78_1151	transcript	ONH76202	protein_coding	c.*166A>G	166	,G	intergenic_region	MODIFIER	BOH78_1151-BOH78_1152	BOH78_1151-BOH78_1152	intergenic_region	BOH78_1151-BOH78_1152	n.280791A>G
BOH78_Sc004	294653	C	T	downstream_gene_variant	MODIFIER				BOH78_1160	transcript	ONH76315	protein_coding	c.*5G>A	5	,T	intergenic_region	MODIFIER	BOH78_1159-BOH78_1160	BOH78_1159-BOH78_1160	intergenic_region	BOH78_1159-BOH78_1160	n.294653C>T
BOH78_Sc004	298730	A	G	downstream_gene_variant	MODIFIER				BOH78_1163	transcript	ONH76317	protein_coding	c.*60T>C	60	,G	intergenic_region	MODIFIER	BOH78_1162-BOH78_1163	BOH78_1162-BOH78_1163	intergenic_region	BOH78_1162-BOH78_1163	n.298730A>G
BOH78_Sc004	301188	T	C	downstream_gene_variant	MODIFIER				BOH78_1164	transcript	ONH76331	protein_coding	c.*108T>C	108	,C	downstream_gene_variant	MODIFIER	BOH78_1165	BOH78_1165	transcript	ONH76332	protein_coding	c.*101A>G	101	,C	intergenic_region	MODIFIER	BOH78_1164-BOH78_1165	BOH78_1164-BOH78_1165	intergenic_region	BOH78_1164-BOH78_1165	n.301188T>C
BOH78_Sc004	309653	T	C	downstream_gene_variant	MODIFIER				BOH78_1170	transcript	ONH76240	protein_coding	c.*41T>C	41	,C	downstream_gene_variant	MODIFIER	BOH78_1171	BOH78_1171	transcript	ONH76239	protein_coding	c.*125A>G	125	,C	intergenic_region	MODIFIER	BOH78_1170-BOH78_1171	BOH78_1170-BOH78_1171	intergenic_region	BOH78_1170-BOH78_1171	n.309653T>C
BOH78_Sc004	316412	A	G	downstream_gene_variant	MODIFIER				BOH78_1174	transcript	ONH76437	protein_coding	c.*136A>G	136	,G	intergenic_region	MODIFIER	BOH78_1174-BOH78_1175	BOH78_1174-BOH78_1175	intergenic_region	BOH78_1174-BOH78_1175	n.316412A>G
BOH78_Sc004	316385	C	A	downstream_gene_variant	MODIFIER				BOH78_1174	transcript	ONH76437	protein_coding	c.*109C>A	109	,A	intergenic_region	MODIFIER	BOH78_1174-BOH78_1175	BOH78_1174-BOH78_1175	intergenic_region	BOH78_1174-BOH78_1175	n.316385C>A
BOH78_Sc004	316511	A	G	downstream_gene_variant	MODIFIER				BOH78_1174	transcript	ONH76437	protein_coding	c.*235A>G	235	,G	intergenic_region	MODIFIER	BOH78_1174-BOH78_1175	BOH78_1174-BOH78_1175	intergenic_region	BOH78_1174-BOH78_1175	n.316511A>G
BOH78_Sc004	316545	C	A	downstream_gene_variant	MODIFIER				BOH78_1174	transcript	ONH76437	protein_coding	c.*269C>A	269	,A	intergenic_region	MODIFIER	BOH78_1174-BOH78_1175	BOH78_1174-BOH78_1175	intergenic_region	BOH78_1174-BOH78_1175	n.316545C>A
BOH78_Sc004	322414	A	G	downstream_gene_variant	MODIFIER				BOH78_1175	transcript	ONH76236	protein_coding	c.*284A>G	284	WARNING_TRANSCRIPT_NO_STOP_CODON,G	intergenic_region	MODIFIER	BOH78_1175-BOH78_1176	BOH78_1175-BOH78_1176	intergenic_region	BOH78_1175-BOH78_1176	n.322414A>G
BOH78_Sc004	322544	C	T	downstream_gene_variant	MODIFIER				BOH78_1175	transcript	ONH76236	protein_coding	c.*414C>T	414	WARNING_TRANSCRIPT_NO_STOP_CODON,T	intergenic_region	MODIFIER	BOH78_1175-BOH78_1176	BOH78_1175-BOH78_1176	intergenic_region	BOH78_1175-BOH78_1176	n.322544C>T
BOH78_Sc004	322629	C	T	downstream_gene_variant	MODIFIER				BOH78_1175	transcript	ONH76236	protein_coding	c.*499C>T	499	WARNING_TRANSCRIPT_NO_STOP_CODON,T	intergenic_region	MODIFIER	BOH78_1175-BOH78_1176	BOH78_1175-BOH78_1176	intergenic_region	BOH78_1175-BOH78_1176	n.322629C>T
BOH78_Sc004	322172	T	C	downstream_gene_variant	MODIFIER				BOH78_1175	transcript	ONH76236	protein_coding	c.*42T>C	42	WARNING_TRANSCRIPT_NO_STOP_CODON,C	intergenic_region	MODIFIER	BOH78_1175-BOH78_1176	BOH78_1175-BOH78_1176	intergenic_region	BOH78_1175-BOH78_1176	n.322172T>C
BOH78_Sc004	322208	G	C	downstream_gene_variant	MODIFIER				BOH78_1175	transcript	ONH76236	protein_coding	c.*78G>C	78	WARNING_TRANSCRIPT_NO_STOP_CODON,C	intergenic_region	MODIFIER	BOH78_1175-BOH78_1176	BOH78_1175-BOH78_1176	intergenic_region	BOH78_1175-BOH78_1176	n.322208G>C
BOH78_Sc004	322398	G	A	downstream_gene_variant	MODIFIER				BOH78_1175	transcript	ONH76236	protein_coding	c.*268G>A	268	WARNING_TRANSCRIPT_NO_STOP_CODON,A	intergenic_region	MODIFIER	BOH78_1175-BOH78_1176	BOH78_1175-BOH78_1176	intergenic_region	BOH78_1175-BOH78_1176	n.322398G>A
BOH78_Sc004	322397	T	C	downstream_gene_variant	MODIFIER				BOH78_1175	transcript	ONH76236	protein_coding	c.*267T>C	267	WARNING_TRANSCRIPT_NO_STOP_CODON,C	intergenic_region	MODIFIER	BOH78_1175-BOH78_1176	BOH78_1175-BOH78_1176	intergenic_region	BOH78_1175-BOH78_1176	n.322397T>C
BOH78_Sc004	330071	G	T	downstream_gene_variant	MODIFIER				BOH78_1180	transcript	ONH76300	protein_coding	c.*41G>T	41	,T	downstream_gene_variant	MODIFIER	BOH78_1181	BOH78_1181	transcript	ONH76301	protein_coding	c.*47C>A	47	,T	intergenic_region	MODIFIER	BOH78_1180-BOH78_1181	BOH78_1180-BOH78_1181	intergenic_region	BOH78_1180-BOH78_1181	n.330071G>T
BOH78_Sc004	342387	G	A	downstream_gene_variant	MODIFIER				BOH78_1184	transcript	ONH76296	protein_coding	c.*184G>A	184	,A	intergenic_region	MODIFIER	BOH78_1184-BOH78_1185	BOH78_1184-BOH78_1185	intergenic_region	BOH78_1184-BOH78_1185	n.342387G>A
BOH78_Sc004	342616	T	C	downstream_gene_variant	MODIFIER				BOH78_1184	transcript	ONH76296	protein_coding	c.*413T>C	413	,C	downstream_gene_variant	MODIFIER	BOH78_1185	BOH78_1185	transcript	ONH76297	protein_coding	c.*344A>G	344	,C	intergenic_region	MODIFIER	BOH78_1184-BOH78_1185	BOH78_1184-BOH78_1185	intergenic_region	BOH78_1184-BOH78_1185	n.342616T>C
BOH78_Sc004	342334	G	A	downstream_gene_variant	MODIFIER				BOH78_1184	transcript	ONH76296	protein_coding	c.*131G>A	131	,A	intergenic_region	MODIFIER	BOH78_1184-BOH78_1185	BOH78_1184-BOH78_1185	intergenic_region	BOH78_1184-BOH78_1185	n.342334G>A
BOH78_Sc004	342833	T	C	downstream_gene_variant	MODIFIER				BOH78_1185	transcript	ONH76297	protein_coding	c.*127A>G	127	,C	intergenic_region	MODIFIER	BOH78_1184-BOH78_1185	BOH78_1184-BOH78_1185	intergenic_region	BOH78_1184-BOH78_1185	n.342833T>C
BOH78_Sc004	342749	T	C	downstream_gene_variant	MODIFIER				BOH78_1185	transcript	ONH76297	protein_coding	c.*211A>G	211	,C	intergenic_region	MODIFIER	BOH78_1184-BOH78_1185	BOH78_1184-BOH78_1185	intergenic_region	BOH78_1184-BOH78_1185	n.342749T>C
BOH78_Sc004	347902	A	G	downstream_gene_variant	MODIFIER				BOH78_1186	transcript	ONH76294	protein_coding	c.*408A>G	408	,G	intergenic_region	MODIFIER	BOH78_1186-BOH78_1187	BOH78_1186-BOH78_1187	intergenic_region	BOH78_1186-BOH78_1187	n.347902A>G
BOH78_Sc004	347505	A	G	downstream_gene_variant	MODIFIER				BOH78_1186	transcript	ONH76294	protein_coding	c.*11A>G	11	,G	intergenic_region	MODIFIER	BOH78_1186-BOH78_1187	BOH78_1186-BOH78_1187	intergenic_region	BOH78_1186-BOH78_1187	n.347505A>G
BOH78_Sc004	347802	C	T	downstream_gene_variant	MODIFIER				BOH78_1186	transcript	ONH76294	protein_coding	c.*308C>T	308	,T	intergenic_region	MODIFIER	BOH78_1186-BOH78_1187	BOH78_1186-BOH78_1187	intergenic_region	BOH78_1186-BOH78_1187	n.347802C>T
BOH78_Sc004	347769	T	C	downstream_gene_variant	MODIFIER				BOH78_1186	transcript	ONH76294	protein_coding	c.*275T>C	275	,C	intergenic_region	MODIFIER	BOH78_1186-BOH78_1187	BOH78_1186-BOH78_1187	intergenic_region	BOH78_1186-BOH78_1187	n.347769T>C
BOH78_Sc004	347572	T	A	downstream_gene_variant	MODIFIER				BOH78_1186	transcript	ONH76294	protein_coding	c.*78T>A	78	,A	intergenic_region	MODIFIER	BOH78_1186-BOH78_1187	BOH78_1186-BOH78_1187	intergenic_region	BOH78_1186-BOH78_1187	n.347572T>A
BOH78_Sc004	347578	T	C	downstream_gene_variant	MODIFIER				BOH78_1186	transcript	ONH76294	protein_coding	c.*84T>C	84	,C	intergenic_region	MODIFIER	BOH78_1186-BOH78_1187	BOH78_1186-BOH78_1187	intergenic_region	BOH78_1186-BOH78_1187	n.347578T>C
BOH78_Sc004	347722	C	T	downstream_gene_variant	MODIFIER				BOH78_1186	transcript	ONH76294	protein_coding	c.*228C>T	228	,T	intergenic_region	MODIFIER	BOH78_1186-BOH78_1187	BOH78_1186-BOH78_1187	intergenic_region	BOH78_1186-BOH78_1187	n.347722C>T
BOH78_Sc004	347698	G	A	downstream_gene_variant	MODIFIER				BOH78_1186	transcript	ONH76294	protein_coding	c.*204G>A	204	,A	intergenic_region	MODIFIER	BOH78_1186-BOH78_1187	BOH78_1186-BOH78_1187	intergenic_region	BOH78_1186-BOH78_1187	n.347698G>A
BOH78_Sc004	347652	T	C	downstream_gene_variant	MODIFIER				BOH78_1186	transcript	ONH76294	protein_coding	c.*158T>C	158	,C	intergenic_region	MODIFIER	BOH78_1186-BOH78_1187	BOH78_1186-BOH78_1187	intergenic_region	BOH78_1186-BOH78_1187	n.347652T>C
BOH78_Sc004	347691	A	G	downstream_gene_variant	MODIFIER				BOH78_1186	transcript	ONH76294	protein_coding	c.*197A>G	197	,G	intergenic_region	MODIFIER	BOH78_1186-BOH78_1187	BOH78_1186-BOH78_1187	intergenic_region	BOH78_1186-BOH78_1187	n.347691A>G
BOH78_Sc004	347664	A	T	downstream_gene_variant	MODIFIER				BOH78_1186	transcript	ONH76294	protein_coding	c.*170A>T	170	,T	intergenic_region	MODIFIER	BOH78_1186-BOH78_1187	BOH78_1186-BOH78_1187	intergenic_region	BOH78_1186-BOH78_1187	n.347664A>T
BOH78_Sc004	347668	T	G	downstream_gene_variant	MODIFIER				BOH78_1186	transcript	ONH76294	protein_coding	c.*174T>G	174	,G	intergenic_region	MODIFIER	BOH78_1186-BOH78_1187	BOH78_1186-BOH78_1187	intergenic_region	BOH78_1186-BOH78_1187	n.347668T>G
BOH78_Sc004	347738	C	A	downstream_gene_variant	MODIFIER				BOH78_1186	transcript	ONH76294	protein_coding	c.*244C>A	244	,A	intergenic_region	MODIFIER	BOH78_1186-BOH78_1187	BOH78_1186-BOH78_1187	intergenic_region	BOH78_1186-BOH78_1187	n.347738C>A
BOH78_Sc004	348987	T	C	downstream_gene_variant	MODIFIER				BOH78_1187	transcript	ONH76295	protein_coding	c.*385A>G	385	,C	intergenic_region	MODIFIER	BOH78_1186-BOH78_1187	BOH78_1186-BOH78_1187	intergenic_region	BOH78_1186-BOH78_1187	n.348987T>C
BOH78_Sc004	349343	C	T	downstream_gene_variant	MODIFIER				BOH78_1187	transcript	ONH76295	protein_coding	c.*29G>A	29	,T	intergenic_region	MODIFIER	BOH78_1186-BOH78_1187	BOH78_1186-BOH78_1187	intergenic_region	BOH78_1186-BOH78_1187	n.349343C>T
BOH78_Sc004	348991	G	A	downstream_gene_variant	MODIFIER				BOH78_1187	transcript	ONH76295	protein_coding	c.*381C>T	381	,A	intergenic_region	MODIFIER	BOH78_1186-BOH78_1187	BOH78_1186-BOH78_1187	intergenic_region	BOH78_1186-BOH78_1187	n.348991G>A
BOH78_Sc004	349350	C	T	downstream_gene_variant	MODIFIER				BOH78_1187	transcript	ONH76295	protein_coding	c.*22G>A	22	,T	intergenic_region	MODIFIER	BOH78_1186-BOH78_1187	BOH78_1186-BOH78_1187	intergenic_region	BOH78_1186-BOH78_1187	n.349350C>T
BOH78_Sc004	354024	C	T	downstream_gene_variant	MODIFIER				BOH78_1189	transcript	ONH76303	protein_coding	c.*157G>A	157	,T	intergenic_region	MODIFIER	BOH78_1188-BOH78_1189	BOH78_1188-BOH78_1189	intergenic_region	BOH78_1188-BOH78_1189	n.354024C>T
BOH78_Sc004	353744	T	C	downstream_gene_variant	MODIFIER				BOH78_1189	transcript	ONH76303	protein_coding	c.*437A>G	437	,C	intergenic_region	MODIFIER	BOH78_1188-BOH78_1189	BOH78_1188-BOH78_1189	intergenic_region	BOH78_1188-BOH78_1189	n.353744T>C
BOH78_Sc004	353855	G	C	downstream_gene_variant	MODIFIER				BOH78_1189	transcript	ONH76303	protein_coding	c.*326C>G	326	,C	intergenic_region	MODIFIER	BOH78_1188-BOH78_1189	BOH78_1188-BOH78_1189	intergenic_region	BOH78_1188-BOH78_1189	n.353855G>C
BOH78_Sc004	353908	A	G	downstream_gene_variant	MODIFIER				BOH78_1189	transcript	ONH76303	protein_coding	c.*273T>C	273	,G	intergenic_region	MODIFIER	BOH78_1188-BOH78_1189	BOH78_1188-BOH78_1189	intergenic_region	BOH78_1188-BOH78_1189	n.353908A>G
BOH78_Sc004	353987	G	A	downstream_gene_variant	MODIFIER				BOH78_1189	transcript	ONH76303	protein_coding	c.*194C>T	194	,A	intergenic_region	MODIFIER	BOH78_1188-BOH78_1189	BOH78_1188-BOH78_1189	intergenic_region	BOH78_1188-BOH78_1189	n.353987G>A
BOH78_Sc004	361427	G	A	downstream_gene_variant	MODIFIER				BOH78_1191	transcript	ONH76446	protein_coding	c.*352G>A	352	,A	intergenic_region	MODIFIER	BOH78_1191-BOH78_1192	BOH78_1191-BOH78_1192	intergenic_region	BOH78_1191-BOH78_1192	n.361427G>A
BOH78_Sc004	361245	A	C	downstream_gene_variant	MODIFIER				BOH78_1191	transcript	ONH76446	protein_coding	c.*170A>C	170	,C	intergenic_region	MODIFIER	BOH78_1191-BOH78_1192	BOH78_1191-BOH78_1192	intergenic_region	BOH78_1191-BOH78_1192	n.361245A>C
BOH78_Sc004	361384	G	T	downstream_gene_variant	MODIFIER				BOH78_1191	transcript	ONH76446	protein_coding	c.*309G>T	309	,T	intergenic_region	MODIFIER	BOH78_1191-BOH78_1192	BOH78_1191-BOH78_1192	intergenic_region	BOH78_1191-BOH78_1192	n.361384G>T
BOH78_Sc004	361270	A	C	downstream_gene_variant	MODIFIER				BOH78_1191	transcript	ONH76446	protein_coding	c.*195A>C	195	,C	intergenic_region	MODIFIER	BOH78_1191-BOH78_1192	BOH78_1191-BOH78_1192	intergenic_region	BOH78_1191-BOH78_1192	n.361270A>C
BOH78_Sc004	361147	T	C	downstream_gene_variant	MODIFIER				BOH78_1191	transcript	ONH76446	protein_coding	c.*72T>C	72	,C	intergenic_region	MODIFIER	BOH78_1191-BOH78_1192	BOH78_1191-BOH78_1192	intergenic_region	BOH78_1191-BOH78_1192	n.361147T>C
BOH78_Sc004	361078	G	T	downstream_gene_variant	MODIFIER				BOH78_1191	transcript	ONH76446	protein_coding	c.*3G>T	3	,T	intergenic_region	MODIFIER	BOH78_1191-BOH78_1192	BOH78_1191-BOH78_1192	intergenic_region	BOH78_1191-BOH78_1192	n.361078G>T
BOH78_Sc004	372286	C	G	downstream_gene_variant	MODIFIER				BOH78_1195	transcript	ONH76442	protein_coding	c.*8C>G	8	,G	downstream_gene_variant	MODIFIER	BOH78_1196	BOH78_1196	transcript	ONH76445	protein_coding	c.*230G>C	230	,G	intergenic_region	MODIFIER	BOH78_1195-BOH78_1196	BOH78_1195-BOH78_1196	intergenic_region	BOH78_1195-BOH78_1196	n.372286C>G
BOH78_Sc004	372462	G	C	downstream_gene_variant	MODIFIER				BOH78_1195	transcript	ONH76442	protein_coding	c.*184G>C	184	,C	downstream_gene_variant	MODIFIER	BOH78_1196	BOH78_1196	transcript	ONH76445	protein_coding	c.*54C>G	54	,C	intergenic_region	MODIFIER	BOH78_1195-BOH78_1196	BOH78_1195-BOH78_1196	intergenic_region	BOH78_1195-BOH78_1196	n.372462G>C
BOH78_Sc004	381552	A	T	downstream_gene_variant	MODIFIER				BOH78_1199	transcript	ONH76450	protein_coding	c.*360A>T	360	,T	intergenic_region	MODIFIER	BOH78_1199-BOH78_1200	BOH78_1199-BOH78_1200	intergenic_region	BOH78_1199-BOH78_1200	n.381552A>T
BOH78_Sc004	381227	C	T	downstream_gene_variant	MODIFIER				BOH78_1199	transcript	ONH76450	protein_coding	c.*35C>T	35	,T	intergenic_region	MODIFIER	BOH78_1199-BOH78_1200	BOH78_1199-BOH78_1200	intergenic_region	BOH78_1199-BOH78_1200	n.381227C>T
BOH78_Sc004	381407	C	A	downstream_gene_variant	MODIFIER				BOH78_1199	transcript	ONH76450	protein_coding	c.*215C>A	215	,A	intergenic_region	MODIFIER	BOH78_1199-BOH78_1200	BOH78_1199-BOH78_1200	intergenic_region	BOH78_1199-BOH78_1200	n.381407C>A
BOH78_Sc004	381679	A	G	downstream_gene_variant	MODIFIER				BOH78_1199	transcript	ONH76450	protein_coding	c.*487A>G	487	,G	intergenic_region	MODIFIER	BOH78_1199-BOH78_1200	BOH78_1199-BOH78_1200	intergenic_region	BOH78_1199-BOH78_1200	n.381679A>G
BOH78_Sc004	394508	G	A	downstream_gene_variant	MODIFIER				BOH78_1207	transcript	ONH76423	protein_coding	c.*395C>T	395	,A	intergenic_region	MODIFIER	BOH78_1206-BOH78_1207	BOH78_1206-BOH78_1207	intergenic_region	BOH78_1206-BOH78_1207	n.394508G>A
BOH78_Sc004	394586	C	A	downstream_gene_variant	MODIFIER				BOH78_1207	transcript	ONH76423	protein_coding	c.*317G>T	317	,A	intergenic_region	MODIFIER	BOH78_1206-BOH78_1207	BOH78_1206-BOH78_1207	intergenic_region	BOH78_1206-BOH78_1207	n.394586C>A
BOH78_Sc004	402432	A	G	downstream_gene_variant	MODIFIER				BOH78_1208	transcript	ONH76430	protein_coding	c.*468A>G	468	,G	intergenic_region	MODIFIER	BOH78_1208-BOH78_1209	BOH78_1208-BOH78_1209	intergenic_region	BOH78_1208-BOH78_1209	n.402432A>G
BOH78_Sc004	402078	A	T	downstream_gene_variant	MODIFIER				BOH78_1208	transcript	ONH76430	protein_coding	c.*114A>T	114	,T	intergenic_region	MODIFIER	BOH78_1208-BOH78_1209	BOH78_1208-BOH78_1209	intergenic_region	BOH78_1208-BOH78_1209	n.402078A>T
BOH78_Sc004	402004	A	T	downstream_gene_variant	MODIFIER				BOH78_1208	transcript	ONH76430	protein_coding	c.*40A>T	40	,T	intergenic_region	MODIFIER	BOH78_1208-BOH78_1209	BOH78_1208-BOH78_1209	intergenic_region	BOH78_1208-BOH78_1209	n.402004A>T
BOH78_Sc004	402193	A	G	downstream_gene_variant	MODIFIER				BOH78_1208	transcript	ONH76430	protein_coding	c.*229A>G	229	,G	intergenic_region	MODIFIER	BOH78_1208-BOH78_1209	BOH78_1208-BOH78_1209	intergenic_region	BOH78_1208-BOH78_1209	n.402193A>G
BOH78_Sc004	402301	A	G	downstream_gene_variant	MODIFIER				BOH78_1208	transcript	ONH76430	protein_coding	c.*337A>G	337	,G	intergenic_region	MODIFIER	BOH78_1208-BOH78_1209	BOH78_1208-BOH78_1209	intergenic_region	BOH78_1208-BOH78_1209	n.402301A>G
BOH78_Sc004	402368	T	A	downstream_gene_variant	MODIFIER				BOH78_1208	transcript	ONH76430	protein_coding	c.*404T>A	404	,A	intergenic_region	MODIFIER	BOH78_1208-BOH78_1209	BOH78_1208-BOH78_1209	intergenic_region	BOH78_1208-BOH78_1209	n.402368T>A
BOH78_Sc004	402057	A	G	downstream_gene_variant	MODIFIER				BOH78_1208	transcript	ONH76430	protein_coding	c.*93A>G	93	,G	intergenic_region	MODIFIER	BOH78_1208-BOH78_1209	BOH78_1208-BOH78_1209	intergenic_region	BOH78_1208-BOH78_1209	n.402057A>G
BOH78_Sc004	415719	G	A	downstream_gene_variant	MODIFIER				BOH78_1215	transcript	ONH76267	protein_coding	c.*8G>A	8	,A	downstream_gene_variant	MODIFIER	BOH78_1216	BOH78_1216	transcript	ONH76264	protein_coding	c.*67C>T	67	,A	intergenic_region	MODIFIER	BOH78_1215-BOH78_1216	BOH78_1215-BOH78_1216	intergenic_region	BOH78_1215-BOH78_1216	n.415719G>A
BOH78_Sc004	415785	A	G	downstream_gene_variant	MODIFIER				BOH78_1215	transcript	ONH76267	protein_coding	c.*74A>G	74	,G	downstream_gene_variant	MODIFIER	BOH78_1216	BOH78_1216	transcript	ONH76264	protein_coding	c.*1T>C	1	,G	intergenic_region	MODIFIER	BOH78_1215-BOH78_1216	BOH78_1215-BOH78_1216	intergenic_region	BOH78_1215-BOH78_1216	n.415785A>G
BOH78_Sc004	416119	G	C	downstream_gene_variant	MODIFIER				BOH78_1215	transcript	ONH76267	protein_coding	c.*408G>C	408	,C	intron_variant	MODIFIER	BOH78_1216	BOH78_1216	transcript	ONH76264	protein_coding	2023-01-01	c.1535-68C>G
BOH78_Sc004	416148	T	C	downstream_gene_variant	MODIFIER				BOH78_1215	transcript	ONH76267	protein_coding	c.*437T>C	437	,C	intron_variant	MODIFIER	BOH78_1216	BOH78_1216	transcript	ONH76264	protein_coding	2023-01-01	c.1535-97A>G
BOH78_Sc004	419196	T	C	downstream_gene_variant	MODIFIER				BOH78_1217	transcript	ONH76265	protein_coding	c.*89T>C	89	,C	downstream_gene_variant	MODIFIER	BOH78_1218	BOH78_1218	transcript	ONH76272	protein_coding	c.*112A>G	112	,C	intergenic_region	MODIFIER	BOH78_1217-BOH78_1218	BOH78_1217-BOH78_1218	intergenic_region	BOH78_1217-BOH78_1218	n.419196T>C
BOH78_Sc004	421384	T	C	downstream_gene_variant	MODIFIER				BOH78_1220	transcript	ONH76382	protein_coding	c.*442A>G	442	,C	intron_variant	MODIFIER	BOH78_1219	BOH78_1219	transcript	ONH76273	protein_coding	2023-01-01	c.130-13T>C
BOH78_Sc004	433846	G	A	downstream_gene_variant	MODIFIER				BOH78_1223	transcript	ONH76454	protein_coding	c.*9G>A	9	,A	downstream_gene_variant	MODIFIER	BOH78_1224	BOH78_1224	transcript	ONH76460	protein_coding	c.*85C>T	85	,A	intergenic_region	MODIFIER	BOH78_1223-BOH78_1224	BOH78_1223-BOH78_1224	intergenic_region	BOH78_1223-BOH78_1224	n.433846G>A
BOH78_Sc004	449691	C	T	downstream_gene_variant	MODIFIER				BOH78_1228	transcript	ONH76453	protein_coding	c.*168C>T	168	,T	intergenic_region	MODIFIER	BOH78_1228-BOH78_1229	BOH78_1228-BOH78_1229	intergenic_region	BOH78_1228-BOH78_1229	n.449691C>T
BOH78_Sc004	468640	T	G	downstream_gene_variant	MODIFIER				BOH78_1235	transcript	ONH76308	protein_coding	c.*29T>G	29	,G	intergenic_region	MODIFIER	BOH78_1235-BOH78_1236	BOH78_1235-BOH78_1236	intergenic_region	BOH78_1235-BOH78_1236	n.468640T>G
BOH78_Sc004	469473	C	T	downstream_gene_variant	MODIFIER				BOH78_1236	transcript	ONH76309	protein_coding	c.*75C>T	75	,T	downstream_gene_variant	MODIFIER	BOH78_1237	BOH78_1237	transcript	ONH76310	protein_coding	c.*202G>A	202	,T	intergenic_region	MODIFIER	BOH78_1236-BOH78_1237	BOH78_1236-BOH78_1237	intergenic_region	BOH78_1236-BOH78_1237	n.469473C>T
BOH78_Sc004	469615	A	G	downstream_gene_variant	MODIFIER				BOH78_1236	transcript	ONH76309	protein_coding	c.*217A>G	217	,G	downstream_gene_variant	MODIFIER	BOH78_1237	BOH78_1237	transcript	ONH76310	protein_coding	c.*60T>C	60	,G	intergenic_region	MODIFIER	BOH78_1236-BOH78_1237	BOH78_1236-BOH78_1237	intergenic_region	BOH78_1236-BOH78_1237	n.469615A>G
BOH78_Sc004	469835	G	A	downstream_gene_variant	MODIFIER				BOH78_1236	transcript	ONH76309	protein_coding	c.*437G>A	437	,A	intron_variant	MODIFIER	BOH78_1237	BOH78_1237	transcript	ONH76310	protein_coding	2023-01-01	c.1005+105C>T
BOH78_Sc004	489614	A	G	downstream_gene_variant	MODIFIER				BOH78_1245	transcript	ONH76394	protein_coding	c.*222A>G	222	,G	intergenic_region	MODIFIER	BOH78_1245-BOH78_1246	BOH78_1245-BOH78_1246	intergenic_region	BOH78_1245-BOH78_1246	n.489614A>G
BOH78_Sc004	499534	A	G	downstream_gene_variant	MODIFIER				BOH78_1250	transcript	ONH76229	protein_coding	c.*86A>G	86	,G	intergenic_region	MODIFIER	BOH78_1250-BOH78_1251	BOH78_1250-BOH78_1251	intergenic_region	BOH78_1250-BOH78_1251	n.499534A>G
BOH78_Sc004	499514	A	G	downstream_gene_variant	MODIFIER				BOH78_1250	transcript	ONH76229	protein_coding	c.*66A>G	66	,G	intergenic_region	MODIFIER	BOH78_1250-BOH78_1251	BOH78_1250-BOH78_1251	intergenic_region	BOH78_1250-BOH78_1251	n.499514A>G
BOH78_Sc004	500591	A	G	downstream_gene_variant	MODIFIER				BOH78_1251	transcript	ONH76230	protein_coding	c.*75T>C	75	,G	intergenic_region	MODIFIER	BOH78_1250-BOH78_1251	BOH78_1250-BOH78_1251	intergenic_region	BOH78_1250-BOH78_1251	n.500591A>G
BOH78_Sc004	501695	C	G	downstream_gene_variant	MODIFIER				BOH78_1252	transcript	ONH76227	protein_coding	c.*58G>C	58	,G	intergenic_region	MODIFIER	BOH78_1251-BOH78_1252	BOH78_1251-BOH78_1252	intergenic_region	BOH78_1251-BOH78_1252	n.501695C>G
BOH78_Sc004	524064	C	A	downstream_gene_variant	MODIFIER				BOH78_1256	transcript	ONH76231	protein_coding	c.*4C>A	4	,A	intergenic_region	MODIFIER	BOH78_1256-BOH78_1257	BOH78_1256-BOH78_1257	intergenic_region	BOH78_1256-BOH78_1257	n.524064C>A
BOH78_Sc004	524148	G	A	downstream_gene_variant	MODIFIER				BOH78_1256	transcript	ONH76231	protein_coding	c.*88G>A	88	,A	intergenic_region	MODIFIER	BOH78_1256-BOH78_1257	BOH78_1256-BOH78_1257	intergenic_region	BOH78_1256-BOH78_1257	n.524148G>A
BOH78_Sc004	524364	C	T	downstream_gene_variant	MODIFIER				BOH78_1256	transcript	ONH76231	protein_coding	c.*304C>T	304	,T	intergenic_region	MODIFIER	BOH78_1256-BOH78_1257	BOH78_1256-BOH78_1257	intergenic_region	BOH78_1256-BOH78_1257	n.524364C>T
BOH78_Sc004	524547	A	T	downstream_gene_variant	MODIFIER				BOH78_1256	transcript	ONH76231	protein_coding	c.*487A>T	487	,T	intergenic_region	MODIFIER	BOH78_1256-BOH78_1257	BOH78_1256-BOH78_1257	intergenic_region	BOH78_1256-BOH78_1257	n.524547A>T
BOH78_Sc004	544504	C	T	downstream_gene_variant	MODIFIER				BOH78_1265	transcript	ONH76411	protein_coding	c.*39C>T	39	,T	downstream_gene_variant	MODIFIER	BOH78_1266	BOH78_1266	transcript	ONH76410	protein_coding	c.*7G>A	7	,T	intergenic_region	MODIFIER	BOH78_1265-BOH78_1266	BOH78_1265-BOH78_1266	intergenic_region	BOH78_1265-BOH78_1266	n.544504C>T
BOH78_Sc004	549511	G	T	downstream_gene_variant	MODIFIER				BOH78_1268	transcript	ONH76408	protein_coding	c.*185G>T	185	,T	downstream_gene_variant	MODIFIER	BOH78_1269	BOH78_1269	transcript	ONH76407	protein_coding	c.*17C>A	17	,T	intergenic_region	MODIFIER	BOH78_1268-BOH78_1269	BOH78_1268-BOH78_1269	intergenic_region	BOH78_1268-BOH78_1269	n.549511G>T
BOH78_Sc004	549351	G	A	downstream_gene_variant	MODIFIER				BOH78_1268	transcript	ONH76408	protein_coding	c.*25G>A	25	,A	downstream_gene_variant	MODIFIER	BOH78_1269	BOH78_1269	transcript	ONH76407	protein_coding	c.*177C>T	177	,A	intergenic_region	MODIFIER	BOH78_1268-BOH78_1269	BOH78_1268-BOH78_1269	intergenic_region	BOH78_1268-BOH78_1269	n.549351G>A
BOH78_Sc004	552258	G	A	downstream_gene_variant	MODIFIER				BOH78_1270	transcript	ONH76243	protein_coding	c.*133G>A	133	,A	intergenic_region	MODIFIER	BOH78_1270-BOH78_1271	BOH78_1270-BOH78_1271	intergenic_region	BOH78_1270-BOH78_1271	n.552258G>A
BOH78_Sc004	552509	G	T	downstream_gene_variant	MODIFIER				BOH78_1270	transcript	ONH76243	protein_coding	c.*384G>T	384	,T	intergenic_region	MODIFIER	BOH78_1270-BOH78_1271	BOH78_1270-BOH78_1271	intergenic_region	BOH78_1270-BOH78_1271	n.552509G>T
BOH78_Sc004	553405	C	T	downstream_gene_variant	MODIFIER				BOH78_1271	transcript	ONH76244	protein_coding	c.*25G>A	25	,T	intergenic_region	MODIFIER	BOH78_1270-BOH78_1271	BOH78_1270-BOH78_1271	intergenic_region	BOH78_1270-BOH78_1271	n.553405C>T
BOH78_Sc004	553365	T	A	downstream_gene_variant	MODIFIER				BOH78_1271	transcript	ONH76244	protein_coding	c.*65A>T	65	,A	intergenic_region	MODIFIER	BOH78_1270-BOH78_1271	BOH78_1270-BOH78_1271	intergenic_region	BOH78_1270-BOH78_1271	n.553365T>A
BOH78_Sc004	553218	T	A	downstream_gene_variant	MODIFIER				BOH78_1271	transcript	ONH76244	protein_coding	c.*212A>T	212	,A	intergenic_region	MODIFIER	BOH78_1270-BOH78_1271	BOH78_1270-BOH78_1271	intergenic_region	BOH78_1270-BOH78_1271	n.553218T>A
BOH78_Sc004	553341	A	G	downstream_gene_variant	MODIFIER				BOH78_1271	transcript	ONH76244	protein_coding	c.*89T>C	89	,G	intergenic_region	MODIFIER	BOH78_1270-BOH78_1271	BOH78_1270-BOH78_1271	intergenic_region	BOH78_1270-BOH78_1271	n.553341A>G
BOH78_Sc004	553204	T	C	downstream_gene_variant	MODIFIER				BOH78_1271	transcript	ONH76244	protein_coding	c.*226A>G	226	,C	intergenic_region	MODIFIER	BOH78_1270-BOH78_1271	BOH78_1270-BOH78_1271	intergenic_region	BOH78_1270-BOH78_1271	n.553204T>C
BOH78_Sc004	553241	A	G	downstream_gene_variant	MODIFIER				BOH78_1271	transcript	ONH76244	protein_coding	c.*189T>C	189	,G	intergenic_region	MODIFIER	BOH78_1270-BOH78_1271	BOH78_1270-BOH78_1271	intergenic_region	BOH78_1270-BOH78_1271	n.553241A>G
BOH78_Sc004	553245	G	T	downstream_gene_variant	MODIFIER				BOH78_1271	transcript	ONH76244	protein_coding	c.*185C>A	185	,T	intergenic_region	MODIFIER	BOH78_1270-BOH78_1271	BOH78_1270-BOH78_1271	intergenic_region	BOH78_1270-BOH78_1271	n.553245G>T
BOH78_Sc004	555478	A	G	downstream_gene_variant	MODIFIER				BOH78_1272	transcript	ONH76245	protein_coding	c.*16T>C	16	,G	intergenic_region	MODIFIER	BOH78_1271-BOH78_1272	BOH78_1271-BOH78_1272	intergenic_region	BOH78_1271-BOH78_1272	n.555478A>G
BOH78_Sc004	555483	C	T	downstream_gene_variant	MODIFIER				BOH78_1272	transcript	ONH76245	protein_coding	c.*11G>A	11	,T	intergenic_region	MODIFIER	BOH78_1271-BOH78_1272	BOH78_1271-BOH78_1272	intergenic_region	BOH78_1271-BOH78_1272	n.555483C>T
BOH78_Sc004	555155	G	T	downstream_gene_variant	MODIFIER				BOH78_1272	transcript	ONH76245	protein_coding	c.*339C>A	339	,T	intergenic_region	MODIFIER	BOH78_1271-BOH78_1272	BOH78_1271-BOH78_1272	intergenic_region	BOH78_1271-BOH78_1272	n.555155G>T
BOH78_Sc004	555446	A	G	downstream_gene_variant	MODIFIER				BOH78_1272	transcript	ONH76245	protein_coding	c.*48T>C	48	,G	intergenic_region	MODIFIER	BOH78_1271-BOH78_1272	BOH78_1271-BOH78_1272	intergenic_region	BOH78_1271-BOH78_1272	n.555446A>G
BOH78_Sc004	555191	G	A	downstream_gene_variant	MODIFIER				BOH78_1272	transcript	ONH76245	protein_coding	c.*303C>T	303	,A	intergenic_region	MODIFIER	BOH78_1271-BOH78_1272	BOH78_1271-BOH78_1272	intergenic_region	BOH78_1271-BOH78_1272	n.555191G>A
BOH78_Sc004	555453	G	T	downstream_gene_variant	MODIFIER				BOH78_1272	transcript	ONH76245	protein_coding	c.*41C>A	41	,T	intergenic_region	MODIFIER	BOH78_1271-BOH78_1272	BOH78_1271-BOH78_1272	intergenic_region	BOH78_1271-BOH78_1272	n.555453G>T
BOH78_Sc004	555457	A	G	downstream_gene_variant	MODIFIER				BOH78_1272	transcript	ONH76245	protein_coding	c.*37T>C	37	,G	intergenic_region	MODIFIER	BOH78_1271-BOH78_1272	BOH78_1271-BOH78_1272	intergenic_region	BOH78_1271-BOH78_1272	n.555457A>G
BOH78_Sc004	566174	A	G	downstream_gene_variant	MODIFIER				BOH78_1276	transcript	ONH76248	protein_coding	c.*207A>G	207	,G	downstream_gene_variant	MODIFIER	BOH78_1277	BOH78_1277	transcript	ONH76249	protein_coding	c.*28T>C	28	,G	intergenic_region	MODIFIER	BOH78_1276-BOH78_1277	BOH78_1276-BOH78_1277	intergenic_region	BOH78_1276-BOH78_1277	n.566174A>G
BOH78_Sc004	566092	G	A	downstream_gene_variant	MODIFIER				BOH78_1276	transcript	ONH76248	protein_coding	c.*125G>A	125	,A	downstream_gene_variant	MODIFIER	BOH78_1277	BOH78_1277	transcript	ONH76249	protein_coding	c.*110C>T	110	,A	intergenic_region	MODIFIER	BOH78_1276-BOH78_1277	BOH78_1276-BOH78_1277	intergenic_region	BOH78_1276-BOH78_1277	n.566092G>A
BOH78_Sc004	568088	T	C	downstream_gene_variant	MODIFIER				BOH78_1278	transcript	ONH76250	protein_coding	c.*415T>C	415	,C	intergenic_region	MODIFIER	BOH78_1278-BOH78_1279	BOH78_1278-BOH78_1279	intergenic_region	BOH78_1278-BOH78_1279	n.568088T>C
BOH78_Sc004	567682	C	T	downstream_gene_variant	MODIFIER				BOH78_1278	transcript	ONH76250	protein_coding	c.*9C>T	9	,T	intergenic_region	MODIFIER	BOH78_1278-BOH78_1279	BOH78_1278-BOH78_1279	intergenic_region	BOH78_1278-BOH78_1279	n.567682C>T
BOH78_Sc004	567839	C	A	downstream_gene_variant	MODIFIER				BOH78_1278	transcript	ONH76250	protein_coding	c.*166C>A	166	,A	intergenic_region	MODIFIER	BOH78_1278-BOH78_1279	BOH78_1278-BOH78_1279	intergenic_region	BOH78_1278-BOH78_1279	n.567839C>A
BOH78_Sc004	568058	C	T	downstream_gene_variant	MODIFIER				BOH78_1278	transcript	ONH76250	protein_coding	c.*385C>T	385	,T	intergenic_region	MODIFIER	BOH78_1278-BOH78_1279	BOH78_1278-BOH78_1279	intergenic_region	BOH78_1278-BOH78_1279	n.568058C>T
BOH78_Sc004	567876	T	C	downstream_gene_variant	MODIFIER				BOH78_1278	transcript	ONH76250	protein_coding	c.*203T>C	203	,C	intergenic_region	MODIFIER	BOH78_1278-BOH78_1279	BOH78_1278-BOH78_1279	intergenic_region	BOH78_1278-BOH78_1279	n.567876T>C
BOH78_Sc004	567999	T	G	downstream_gene_variant	MODIFIER				BOH78_1278	transcript	ONH76250	protein_coding	c.*326T>G	326	,G	intergenic_region	MODIFIER	BOH78_1278-BOH78_1279	BOH78_1278-BOH78_1279	intergenic_region	BOH78_1278-BOH78_1279	n.567999T>G
BOH78_Sc004	568409	T	G	downstream_gene_variant	MODIFIER				BOH78_1279	transcript	ONH76251	protein_coding	c.*329A>C	329	,G	intergenic_region	MODIFIER	BOH78_1278-BOH78_1279	BOH78_1278-BOH78_1279	intergenic_region	BOH78_1278-BOH78_1279	n.568409T>G
BOH78_Sc004	568449	G	A	downstream_gene_variant	MODIFIER				BOH78_1279	transcript	ONH76251	protein_coding	c.*289C>T	289	,A	intergenic_region	MODIFIER	BOH78_1278-BOH78_1279	BOH78_1278-BOH78_1279	intergenic_region	BOH78_1278-BOH78_1279	n.568449G>A
BOH78_Sc004	568466	C	G	downstream_gene_variant	MODIFIER				BOH78_1279	transcript	ONH76251	protein_coding	c.*272G>C	272	,G	intergenic_region	MODIFIER	BOH78_1278-BOH78_1279	BOH78_1278-BOH78_1279	intergenic_region	BOH78_1278-BOH78_1279	n.568466C>G
BOH78_Sc004	568479	A	G	downstream_gene_variant	MODIFIER				BOH78_1279	transcript	ONH76251	protein_coding	c.*259T>C	259	,G	intergenic_region	MODIFIER	BOH78_1278-BOH78_1279	BOH78_1278-BOH78_1279	intergenic_region	BOH78_1278-BOH78_1279	n.568479A>G
BOH78_Sc004	568616	A	T	downstream_gene_variant	MODIFIER				BOH78_1279	transcript	ONH76251	protein_coding	c.*122T>A	122	,T	intergenic_region	MODIFIER	BOH78_1278-BOH78_1279	BOH78_1278-BOH78_1279	intergenic_region	BOH78_1278-BOH78_1279	n.568616A>T
BOH78_Sc004	568430	T	A	downstream_gene_variant	MODIFIER				BOH78_1279	transcript	ONH76251	protein_coding	c.*308A>T	308	,A	intergenic_region	MODIFIER	BOH78_1278-BOH78_1279	BOH78_1278-BOH78_1279	intergenic_region	BOH78_1278-BOH78_1279	n.568430T>A
BOH78_Sc004	568397	T	C	downstream_gene_variant	MODIFIER				BOH78_1279	transcript	ONH76251	protein_coding	c.*341A>G	341	,C	intergenic_region	MODIFIER	BOH78_1278-BOH78_1279	BOH78_1278-BOH78_1279	intergenic_region	BOH78_1278-BOH78_1279	n.568397T>C
BOH78_Sc004	568382	C	G	downstream_gene_variant	MODIFIER				BOH78_1279	transcript	ONH76251	protein_coding	c.*356G>C	356	,G	intergenic_region	MODIFIER	BOH78_1278-BOH78_1279	BOH78_1278-BOH78_1279	intergenic_region	BOH78_1278-BOH78_1279	n.568382C>G
BOH78_Sc004	568245	A	G	downstream_gene_variant	MODIFIER				BOH78_1279	transcript	ONH76251	protein_coding	c.*493T>C	493	,G	intergenic_region	MODIFIER	BOH78_1278-BOH78_1279	BOH78_1278-BOH78_1279	intergenic_region	BOH78_1278-BOH78_1279	n.568245A>G
BOH78_Sc004	568271	A	T	downstream_gene_variant	MODIFIER				BOH78_1279	transcript	ONH76251	protein_coding	c.*467T>A	467	,T	intergenic_region	MODIFIER	BOH78_1278-BOH78_1279	BOH78_1278-BOH78_1279	intergenic_region	BOH78_1278-BOH78_1279	n.568271A>T
BOH78_Sc004	568273	A	G	downstream_gene_variant	MODIFIER				BOH78_1279	transcript	ONH76251	protein_coding	c.*465T>C	465	,G	intergenic_region	MODIFIER	BOH78_1278-BOH78_1279	BOH78_1278-BOH78_1279	intergenic_region	BOH78_1278-BOH78_1279	n.568273A>G
BOH78_Sc004	574078	C	G	downstream_gene_variant	MODIFIER				BOH78_1280	transcript	ONH76189	protein_coding	c.*372G>C	372	,G	intergenic_region	MODIFIER	BOH78_1279-BOH78_1280	BOH78_1279-BOH78_1280	intergenic_region	BOH78_1279-BOH78_1280	n.574078C>G
BOH78_Sc004	577158	G	A	downstream_gene_variant	MODIFIER				BOH78_1281	transcript	ONH76256	protein_coding	c.*86C>T	86	,A	intergenic_region	MODIFIER	BOH78_1280-BOH78_1281	BOH78_1280-BOH78_1281	intergenic_region	BOH78_1280-BOH78_1281	n.577158G>A
BOH78_Sc004	576807	A	G	downstream_gene_variant	MODIFIER				BOH78_1281	transcript	ONH76256	protein_coding	c.*437T>C	437	,G	intergenic_region	MODIFIER	BOH78_1280-BOH78_1281	BOH78_1280-BOH78_1281	intergenic_region	BOH78_1280-BOH78_1281	n.576807A>G
BOH78_Sc004	576885	C	T	downstream_gene_variant	MODIFIER				BOH78_1281	transcript	ONH76256	protein_coding	c.*359G>A	359	,T	intergenic_region	MODIFIER	BOH78_1280-BOH78_1281	BOH78_1280-BOH78_1281	intergenic_region	BOH78_1280-BOH78_1281	n.576885C>T
BOH78_Sc004	576872	G	T	downstream_gene_variant	MODIFIER				BOH78_1281	transcript	ONH76256	protein_coding	c.*372C>A	372	,T	intergenic_region	MODIFIER	BOH78_1280-BOH78_1281	BOH78_1280-BOH78_1281	intergenic_region	BOH78_1280-BOH78_1281	n.576872G>T
BOH78_Sc004	597045	A	G	downstream_gene_variant	MODIFIER				BOH78_1290	transcript	ONH76337	protein_coding	c.*26A>G	26	,G	downstream_gene_variant	MODIFIER	BOH78_1291	BOH78_1291	transcript	ONH76323	protein_coding	c.*230T>C	230	,G	intergenic_region	MODIFIER	BOH78_1290-BOH78_1291	BOH78_1290-BOH78_1291	intergenic_region	BOH78_1290-BOH78_1291	n.597045A>G
BOH78_Sc004	597082	C	T	downstream_gene_variant	MODIFIER				BOH78_1290	transcript	ONH76337	protein_coding	c.*63C>T	63	,T	downstream_gene_variant	MODIFIER	BOH78_1291	BOH78_1291	transcript	ONH76323	protein_coding	c.*193G>A	193	,T	intergenic_region	MODIFIER	BOH78_1290-BOH78_1291	BOH78_1290-BOH78_1291	intergenic_region	BOH78_1290-BOH78_1291	n.597082C>T
BOH78_Sc004	598993	T	C	downstream_gene_variant	MODIFIER				BOH78_1292	transcript	ONH76321	protein_coding	c.*146T>C	146	,C	downstream_gene_variant	MODIFIER	BOH78_1293	BOH78_1293	transcript	ONH76322	protein_coding	c.*45A>G	45	,C	intergenic_region	MODIFIER	BOH78_1292-BOH78_1293	BOH78_1292-BOH78_1293	intergenic_region	BOH78_1292-BOH78_1293	n.598993T>C
BOH78_Sc004	598980	T	C	downstream_gene_variant	MODIFIER				BOH78_1292	transcript	ONH76321	protein_coding	c.*133T>C	133	,C	downstream_gene_variant	MODIFIER	BOH78_1293	BOH78_1293	transcript	ONH76322	protein_coding	c.*58A>G	58	,C	intergenic_region	MODIFIER	BOH78_1292-BOH78_1293	BOH78_1292-BOH78_1293	intergenic_region	BOH78_1292-BOH78_1293	n.598980T>C
BOH78_Sc004	616884	G	A	downstream_gene_variant	MODIFIER				BOH78_1304	transcript	ONH76438	protein_coding	c.*117G>A	117	,A	downstream_gene_variant	MODIFIER	BOH78_1305	BOH78_1305	transcript	ONH76312	protein_coding	c.*53C>T	53	,A	intergenic_region	MODIFIER	BOH78_1304-BOH78_1305	BOH78_1304-BOH78_1305	intergenic_region	BOH78_1304-BOH78_1305	n.616884G>A
BOH78_Sc004	620971	C	T	downstream_gene_variant	MODIFIER				BOH78_1307	transcript	ONH76440	protein_coding	c.*298C>T	298	,T	intergenic_region	MODIFIER	BOH78_1307-BOH78_1308	BOH78_1307-BOH78_1308	intergenic_region	BOH78_1307-BOH78_1308	n.620971C>T
BOH78_Sc004	627769	G	A	downstream_gene_variant	MODIFIER				BOH78_1308	transcript	ONH76198	protein_coding	c.*48G>A	48	,A	intergenic_region	MODIFIER	BOH78_1308-BOH78_1309	BOH78_1308-BOH78_1309	intergenic_region	BOH78_1308-BOH78_1309	n.627769G>A
BOH78_Sc004	627758	T	C	downstream_gene_variant	MODIFIER				BOH78_1308	transcript	ONH76198	protein_coding	c.*37T>C	37	,C	intergenic_region	MODIFIER	BOH78_1308-BOH78_1309	BOH78_1308-BOH78_1309	intergenic_region	BOH78_1308-BOH78_1309	n.627758T>C
BOH78_Sc004	627849	T	C	downstream_gene_variant	MODIFIER				BOH78_1308	transcript	ONH76198	protein_coding	c.*128T>C	128	,C	intergenic_region	MODIFIER	BOH78_1308-BOH78_1309	BOH78_1308-BOH78_1309	intergenic_region	BOH78_1308-BOH78_1309	n.627849T>C
BOH78_Sc004	628110	C	G	downstream_gene_variant	MODIFIER				BOH78_1308	transcript	ONH76198	protein_coding	c.*389C>G	389	,G	intergenic_region	MODIFIER	BOH78_1308-BOH78_1309	BOH78_1308-BOH78_1309	intergenic_region	BOH78_1308-BOH78_1309	n.628110C>G
BOH78_Sc004	628030	A	C	downstream_gene_variant	MODIFIER				BOH78_1308	transcript	ONH76198	protein_coding	c.*309A>C	309	,C	intergenic_region	MODIFIER	BOH78_1308-BOH78_1309	BOH78_1308-BOH78_1309	intergenic_region	BOH78_1308-BOH78_1309	n.628030A>C
BOH78_Sc004	628048	C	T	downstream_gene_variant	MODIFIER				BOH78_1308	transcript	ONH76198	protein_coding	c.*327C>T	327	,T	intergenic_region	MODIFIER	BOH78_1308-BOH78_1309	BOH78_1308-BOH78_1309	intergenic_region	BOH78_1308-BOH78_1309	n.628048C>T
BOH78_Sc004	628052	T	C	downstream_gene_variant	MODIFIER				BOH78_1308	transcript	ONH76198	protein_coding	c.*331T>C	331	,C	intergenic_region	MODIFIER	BOH78_1308-BOH78_1309	BOH78_1308-BOH78_1309	intergenic_region	BOH78_1308-BOH78_1309	n.628052T>C
BOH78_Sc004	628117	T	C	downstream_gene_variant	MODIFIER				BOH78_1308	transcript	ONH76198	protein_coding	c.*396T>C	396	,C	intergenic_region	MODIFIER	BOH78_1308-BOH78_1309	BOH78_1308-BOH78_1309	intergenic_region	BOH78_1308-BOH78_1309	n.628117T>C
BOH78_Sc004	628080	G	A	downstream_gene_variant	MODIFIER				BOH78_1308	transcript	ONH76198	protein_coding	c.*359G>A	359	,A	intergenic_region	MODIFIER	BOH78_1308-BOH78_1309	BOH78_1308-BOH78_1309	intergenic_region	BOH78_1308-BOH78_1309	n.628080G>A
BOH78_Sc004	628070	G	A	downstream_gene_variant	MODIFIER				BOH78_1308	transcript	ONH76198	protein_coding	c.*349G>A	349	,A	intergenic_region	MODIFIER	BOH78_1308-BOH78_1309	BOH78_1308-BOH78_1309	intergenic_region	BOH78_1308-BOH78_1309	n.628070G>A
BOH78_Sc004	628071	T	C	downstream_gene_variant	MODIFIER				BOH78_1308	transcript	ONH76198	protein_coding	c.*350T>C	350	,C	intergenic_region	MODIFIER	BOH78_1308-BOH78_1309	BOH78_1308-BOH78_1309	intergenic_region	BOH78_1308-BOH78_1309	n.628071T>C
BOH78_Sc004	632937	C	G	downstream_gene_variant	MODIFIER				BOH78_1312	transcript	ONH76387	protein_coding	c.*50C>G	50	,G	downstream_gene_variant	MODIFIER	BOH78_1313	BOH78_1313	transcript	ONH76348	protein_coding	c.*99G>C	99	,G	intergenic_region	MODIFIER	BOH78_1312-BOH78_1313	BOH78_1312-BOH78_1313	intergenic_region	BOH78_1312-BOH78_1313	n.632937C>G
BOH78_Sc004	633906	C	T	downstream_gene_variant	MODIFIER				BOH78_1314	transcript	ONH76353	protein_coding	c.*313C>T	313	,T	downstream_gene_variant	MODIFIER	BOH78_1315	BOH78_1315	transcript	ONH76352	protein_coding	c.*129C>T	129	,T	intergenic_region	MODIFIER	BOH78_1315-BOH78_1316	BOH78_1315-BOH78_1316	intergenic_region	BOH78_1315-BOH78_1316	n.633906C>T
BOH78_Sc004	633987	T	C	downstream_gene_variant	MODIFIER				BOH78_1314	transcript	ONH76353	protein_coding	c.*394T>C	394	,C	downstream_gene_variant	MODIFIER	BOH78_1315	BOH78_1315	transcript	ONH76352	protein_coding	c.*210T>C	210	,C	intergenic_region	MODIFIER	BOH78_1315-BOH78_1316	BOH78_1315-BOH78_1316	intergenic_region	BOH78_1315-BOH78_1316	n.633987T>C
BOH78_Sc004	634053	A	C	downstream_gene_variant	MODIFIER				BOH78_1314	transcript	ONH76353	protein_coding	c.*460A>C	460	,C	downstream_gene_variant	MODIFIER	BOH78_1315	BOH78_1315	transcript	ONH76352	protein_coding	c.*276A>C	276	,C	intergenic_region	MODIFIER	BOH78_1315-BOH78_1316	BOH78_1315-BOH78_1316	intergenic_region	BOH78_1315-BOH78_1316	n.634053A>C
BOH78_Sc004	633802	C	G	downstream_gene_variant	MODIFIER				BOH78_1314	transcript	ONH76353	protein_coding	c.*209C>G	209	,G	downstream_gene_variant	MODIFIER	BOH78_1315	BOH78_1315	transcript	ONH76352	protein_coding	c.*25C>G	25	,G	intergenic_region	MODIFIER	BOH78_1315-BOH78_1316	BOH78_1315-BOH78_1316	intergenic_region	BOH78_1315-BOH78_1316	n.633802C>G
BOH78_Sc004	634067	T	C	downstream_gene_variant	MODIFIER				BOH78_1314	transcript	ONH76353	protein_coding	c.*474T>C	474	,C	downstream_gene_variant	MODIFIER	BOH78_1315	BOH78_1315	transcript	ONH76352	protein_coding	c.*290T>C	290	,C	intergenic_region	MODIFIER	BOH78_1315-BOH78_1316	BOH78_1315-BOH78_1316	intergenic_region	BOH78_1315-BOH78_1316	n.634067T>C
[truncated: 43,721 more rows]
[truncated: 23 more columns]

## Sheet: 3_Lipid related SNPS
Pk ref ID	Position	ref	V1	Type	Significance	Lipid	Scerevisiae ID	Pk ref ID (orthogroups)	PK ref genes	Type
[truncated: 327 more rows]

## Sheet: 4A_SNPS non-syn changes
BOH78_Sc002	218414	G	A	missense_variant	MODERATE	L	ELO1, ELO2, ELO3	BOH78_0456, BOH78_1875	BOH78_0456	transcript	ONH77331	protein_coding	2023-01-01	c.292G>A	p.Val98Ile	292/915	292/915	98/304
[truncated: 9,827 more rows]
[truncated: 10 more columns]

[truncated: 1 more sheets: 4B_GO non-syn changes]
